# Supplementary material
Source: PubMed Central journal article supplement (PMC9294068)

## Supplemental Materials for:

The impact of social distancing on early SARS-CoV-2 transmission in the United States

Jessica N. Sanchez<sup>1</sup>, Gabriel A. Reyes, Beatriz Martínez-López<sup>2</sup>, and Christine K. Johnson<sup>1\*</sup>

<sup>1</sup> EpiCenter for Disease Dynamics, One Health Institute, School of Veterinary Medicine, University of California at Davis, 1089 Veterinary Medicine Drive, Davis, CA, USA 95616

<sup>2</sup> Center for Animal Disease Modeling and Surveillance (CADMS), Department of Medicine and Epidemiology, School of Veterinary Medicine, University of California at Davis, 944 Garrod Drive, Davis, CA, USA 95616

\* Corresponding author: Christine K. Johnson

Address: EpiCenter for Disease Dynamics, One Health Institute, School of Veterinary Medicine, University of California at Davis, 1089 Veterinary Medicine Drive, Davis, CA, USA 95616

E-mail: ckjohnson@ucdavis.edu

Phone: (530) 752-7526

## Table of Contents

|                                                                                                                                                                                     |    |
|-------------------------------------------------------------------------------------------------------------------------------------------------------------------------------------|----|
| Supplemental Table 1: Changes in mobility by state.....                                                                                                                             | 2  |
| Supplemental Table 2: Results of cross-correlation between daily mobility and daily SARS-CoV-2 case count. 4                                                                        |    |
| Supplemental Table 3: Summary of regression models testing time invariant predictors of cumulative SARS-CoV-2 cases .....                                                           | 6  |
| Supplemental Table 4: Summary of regression models testing association between mobility and daily SARS-CoV-2 cases .....                                                            | 8  |
| Supplemental Figure 1: Daily number of SARS-CoV-2 cases and changes in mobility relative to baseline by state .....                                                                 | 10 |
| Supplemental Figure 2: Proportional change in mobility at the time of government-issued social distancing orders, relative to the maximum degree change over the study period ..... | 61 |
| Supplemental Figure 3: Cross-correlation between daily SARS-CoV-2 cases and mobility.....                                                                                           | 63 |
| Supplemental Figure 4: Plot of mobility model random effects.....                                                                                                                   | 70 |
| Supplemental Figure 5: Posterior predictive checks of mobility models .....                                                                                                         | 72 |

### Supplemental Table 1: Changes in mobility by state

Largest percent change in mobility compared to baseline (baseline = 0) for each state. Negative values represent reductions in mobility and positive values represent increases in mobility. Note: Residential mobility was calculated as the maximum (largest increase) in mobility since movement in this category increased during the study, whereas movement in all other categories were calculated as the minimum (largest decrease) in mobility since movement in these categories decreased during the study. Q1 = first quartile. Q3 = third quartile. SD = standard deviation.

| State          | Mobility category    |                       |                  |                  |                  |                  |
|----------------|----------------------|-----------------------|------------------|------------------|------------------|------------------|
|                | Grocery and Pharmacy | Retail and Recreation | Transit Stations | Workplace        | Residential      | Parks            |
|                | Maximum decrease     | Maximum decrease      | Maximum decrease | Maximum decrease | Maximum increase | Maximum decrease |
| Alabama        | -12.0%               | -40.6%                | -34.9%           | -41.6%           | 16.0%            | -7.0%            |
| Alaska         | -16.7%               | -42.0%                | -51.0%           | -41.3%           | 16.4%            | 7.7%             |
| Arizona        | -17.4%               | -41.6%                | -42.7%           | -45.7%           | 16.4%            | -25.4%           |
| Arkansas       | -8.1%                | -31.7%                | -28.7%           | -36.7%           | 12.4%            | 8.9%             |
| California     | -23.0%               | -55.4%                | -58.4%           | -51.4%           | 22.6%            | -50.1%           |
| Colorado       | -27.3%               | -49.7%                | -59.7%           | -51.9%           | 21.0%            | -36.3%           |
| Connecticut    | -25.1%               | -49.4%                | -57.7%           | -52.1%           | 21.7%            | -4.4%            |
| Delaware       | -25.0%               | -44.9%                | -53.6%           | -49.0%           | 19.3%            | -25.3%           |
| Florida        | -26.4%               | -49.6%                | -60.9%           | -48.4%           | 19.1%            | -54.9%           |
| Georgia        | -15.7%               | -42.3%                | -53.3%           | -49.0%           | 18.9%            | -12.3%           |
| Hawaii         | -32.6%               | -55.0%                | -71.1%           | -51.3%           | 22.1%            | -67.6%           |
| Idaho          | -13.3%               | -40.4%                | -32.1%           | -43.0%           | 15.3%            | 13.1%            |
| Illinois       | -18.7%               | -50.1%                | -53.1%           | -50.3%           | 19.9%            | -27.7%           |
| Indiana        | -19.7%               | -44.1%                | -30.4%           | -46.6%           | 17.6%            | 3.9%             |
| Iowa           | -7.0%                | -44.1%                | -29.7%           | -40.0%           | 16.1%            | 10.1%            |
| Kansas         | -17.0%               | -40.7%                | -27.9%           | -43.3%           | 16.1%            | 17.4%            |
| Kentucky       | -10.6%               | -39.3%                | -36.7%           | -45.3%           | 16.1%            | 10.4%            |
| Louisiana      | -14.4%               | -44.4%                | -49.6%           | -45.4%           | 17.6%            | -24.4%           |
| Maine          | -21.7%               | -49.0%                | -54.3%           | -45.9%           | 17.4%            | -15.0%           |
| Maryland       | -23.4%               | -45.4%                | -56.6%           | -53.3%           | 22.9%            | -4.4%            |
| Massachusetts  | -29.4%               | -53.6%                | -71.6%           | -56.6%           | 23.6%            | -18.6%           |
| Michigan       | -26.7%               | -57.4%                | -55.9%           | -58.6%           | 23.0%            | 0.1%             |
| Minnesota      | -23.7%               | -49.4%                | -59.1%           | -49.0%           | 21.0%            | -2.4%            |
| Mississippi    | -11.0%               | -36.9%                | -33.1%           | -41.6%           | 15.7%            | -15.3%           |
| Missouri       | -13.7%               | -42.0%                | -36.0%           | -44.0%           | 16.0%            | -1.1%            |
| Montana        | -18.4%               | -47.6%                | -38.9%           | -42.3%           | 15.6%            | -6.3%            |
| Nebraska       | -14.9%               | -40.3%                | -26.4%           | -40.1%           | 16.7%            | -3.0%            |
| Nevada         | -18.6%               | -46.6%                | -57.9%           | -55.0%           | 20.0%            | -45.3%           |
| New Hampshire  | -24.7%               | -45.9%                | -53.3%           | -47.6%           | 19.7%            | -14.1%           |
| New Jersey     | -28.0%               | -63.7%                | -69.9%           | -60.0%           | 26.0%            | -28.6%           |
| New Mexico     | -14.3%               | -42.7%                | -34.6%           | -45.4%           | 17.1%            | -20.6%           |
| New York       | -27.0%               | -65.6%                | -70.4%           | -60.0%           | 25.1%            | -38.6%           |
| North Carolina | -12.9%               | -40.4%                | -49.7%           | -46.1%           | 16.4%            | 4.9%             |

|                | Mobility category    |                       |                  |                  |                  |                  |
|----------------|----------------------|-----------------------|------------------|------------------|------------------|------------------|
|                | Grocery and Pharmacy | Retail and Recreation | Transit Stations | Workplace        | Residential      | Parks            |
| State          | Maximum decrease     | Maximum decrease      | Maximum decrease | Maximum decrease | Maximum increase | Maximum decrease |
| North Dakota   | -18.7%               | -47.0%                | -37.7%           | -37.7%           | 17.9%            | -14.4%           |
| Ohio           | -19.6%               | -45.1%                | -33.4%           | -48.1%           | 18.1%            | 19.7%            |
| Oklahoma       | -9.7%                | -35.0%                | -25.0%           | -41.6%           | 15.3%            | -5.4%            |
| Oregon         | -20.7%               | -48.3%                | -46.0%           | -46.0%           | 16.9%            | -15.7%           |
| Pennsylvania   | -23.7%               | -50.4%                | -55.7%           | -52.1%           | 20.3%            | -13.1%           |
| Rhode Island   | -23.9%               | -49.0%                | -66.1%           | -50.0%           | 20.7%            | -0.7%            |
| South Carolina | -12.4%               | -41.9%                | -38.1%           | -44.3%           | 15.7%            | -28.3%           |
| South Dakota   | -12.3%               | -44.1%                | -32.0%           | -38.3%           | 16.9%            | -2.0%            |
| Tennessee      | -11.0%               | -40.0%                | -37.6%           | -44.7%           | 15.9%            | -11.3%           |
| Texas          | -18.6%               | -42.4%                | -46.7%           | -47.3%           | 19.9%            | -35.1%           |
| Utah           | -14.7%               | -39.0%                | -46.1%           | -47.0%           | 17.4%            | 12.0%            |
| Vermont        | -31.9%               | -55.7%                | -61.0%           | -53.4%           | 20.6%            | -13.0%           |
| Virginia       | -17.1%               | -42.1%                | -53.4%           | -48.4%           | 19.1%            | 3.3%             |
| Washington     | -21.7%               | -47.7%                | -58.0%           | -53.1%           | 20.3%            | -13.3%           |
| West Virginia  | -18.4%               | -41.7%                | -34.4%           | -42.0%           | 14.6%            | -8.9%            |
| Wisconsin      | -24.1%               | -51.3%                | -40.4%           | -44.6%           | 18.9%            | 12.4%            |
| Wyoming        | -15.9%               | -40.3%                | -23.1%           | -37.1%           | 15.1%            | -25.4%           |
| minimum        | -32.6%               | -65.6%                | -71.6%           | -60.0%           | 12.4%            | -67.6%           |
| maximum        | -7.0%                | -31.7%                | -23.1%           | -36.7%           | 26.0%            | 19.7%            |
| median         | -18.6%               | -44.6%                | -48.1%           | -46.4%           | 17.7%            | -11.8%           |
| Q1             | -23.8%               | -49.4%                | -57.4%           | -51.0%           | 16.1%            | -25.1%           |
| Q3             | -14.3%               | -41.6%                | -34.6%           | -43.1%           | 20.3%            | -0.1%            |
| mean           | -19.1%               | -45.9%                | -46.7%           | -47.1%           | 18.5%            | -12.2%           |
| SD             | 6.3%                 | 6.7%                  | 13.5%            | 5.7%             | 2.9%             | 19.2%            |

## Supplemental Table 2: Results of cross-correlation between daily mobility and daily SARS-CoV-2 case count

Results of cross-correlation between daily mobility measurements (in six different lifestyle categories) and the daily case count of new severe acute respiratory syndrome coronavirus 2 (SARS-CoV-2) cases in the United States. The lag of mobility reflects the number of days until there was minimal correlation (correlation near zero as it switched from negative to positive, or vice versa), or maximum positive correlation. The days of data is the number of daily observations included in for each state. Q1 = first quartile. Q3 = third quartile. SD = standard deviation.

| State         | Days of data | Mobility category    |                              |                       |                              |                     |                              |                     |                              |                     |                              |                     |                              |
|---------------|--------------|----------------------|------------------------------|-----------------------|------------------------------|---------------------|------------------------------|---------------------|------------------------------|---------------------|------------------------------|---------------------|------------------------------|
|               |              | Grocery and Pharmacy |                              | Retail and Recreation |                              | Transit Stations    |                              | Workplace           |                              | Residential         |                              | Parks               |                              |
|               |              | Minimal correlation  | Maximum positive correlation | Minimal correlation   | Maximum positive correlation | Minimal correlation | Maximum positive correlation | Minimal correlation | Maximum positive correlation | Minimal correlation | Maximum positive correlation | Minimal correlation | Maximum positive correlation |
| Alabama       | 48           | -18                  | -25                          | -21                   | -26                          | -18                 | -26                          | -18                 | -26                          | -19                 | -1                           | -18                 | -26                          |
| Alaska        | 53           | -10                  | -22                          | -12                   | -26                          | -9                  | -20                          | -10                 | -20                          | -10                 | 0                            | -15                 | -24                          |
| Arizona       | 55           | -22                  | -42                          | -24                   | -44                          | -23                 | -43                          | -23                 | -44                          | -24                 | -2                           | -23                 | -43                          |
| Arkansas      | 53           | -32                  | -40                          | -33                   | -42                          | -28                 | -42                          | -29                 | -42                          | -31                 | -2                           | -15                 | -28                          |
| California    | 55           | -24                  | -42                          | -21                   | -43                          | -25                 | -43                          | -24                 | -43                          | -25                 | -5                           | -24                 | -43                          |
| Colorado      | 54           | -24                  | -43                          | -29                   | -45                          | -26                 | -45                          | -24                 | -45                          | -26                 | -5                           | -31                 | -46                          |
| Connecticut   | 51           | -19                  | -37                          | -22                   | -38                          | -21                 | -37                          | -20                 | -37                          | -21                 | -2                           | -24                 | -38                          |
| Delaware      | 53           | -27                  | -41                          | -27                   | -44                          | -27                 | -44                          | -26                 | -44                          | -27                 | -7                           | -21                 | -40                          |
| Florida       | 55           | -15                  | -24                          | -17                   | -26                          | -17                 | -26                          | -17                 | -26                          | -17                 | 0                            | -16                 | -25                          |
| Georgia       | 53           | -18                  | -29                          | -21                   | -36                          | -20                 | -36                          | -20                 | -36                          | -20                 | -2                           | -20                 | -30                          |
| Hawaii        | 45           | -6                   | -15                          | -5                    | -15                          | -4                  | -14                          | -5                  | -15                          | -6                  | 0                            | -7                  | -15                          |
| Idaho         | 52           | -11                  | -19                          | -12                   | -20                          | -11                 | -20                          | -12                 | -20                          | -12                 | 0                            | -12                 | -29                          |
| Illinois      | 55           | -29                  | -43                          | -31                   | -46                          | -29                 | -46                          | -28                 | -45                          | -29                 | -6                           | -39                 | -47                          |
| Indiana       | 52           | -26                  | -42                          | -32                   | -45                          | -23                 | -43                          | -22                 | -44                          | -23                 | -5                           | -19                 | 0                            |
| Iowa          | 53           | -34                  | -43                          | -36                   | -45                          | -33                 | -44                          | -33                 | -44                          | -34                 | -12                          | -12                 | 0                            |
| Kansas        | 53           | -32                  | -42                          | -35                   | -44                          | -33                 | -44                          | -33                 | -44                          | -34                 | -8                           | -21                 | 0                            |
| Kentucky      | 53           | -24                  | -41                          | -27                   | -44                          | -24                 | -42                          | -25                 | -42                          | -25                 | -4                           | -32                 | -21                          |
| Louisiana     | 51           | -12                  | -20                          | -14                   | -21                          | -12                 | -21                          | -12                 | -21                          | -13                 | 0                            | -14                 | -21                          |
| Maine         | 52           | -13                  | -30                          | -17                   | -31                          | -13                 | -20                          | -13                 | -31                          | -14                 | 0                            | -18                 | -21                          |
| Maryland      | 54           | -24                  | -42                          | -26                   | -44                          | -26                 | -45                          | -25                 | -45                          | -25                 | -5                           | -24                 | -42                          |
| Massachusetts | 47           | -20                  | -36                          | -22                   | -36                          | -22                 | -36                          | -21                 | -36                          | -22                 | -3                           | -20                 | -32                          |
| Michigan      | 58           | -9                   | -19                          | -11                   | -22                          | -10                 | -22                          | -10                 | -21                          | -10                 | 0                            | -16                 | -22                          |
| Minnesota     | 53           | -34                  | -43                          | -36                   | -45                          | -35                 | -45                          | -34                 | -45                          | -35                 | -15                          | -11                 | 0                            |
| Mississippi   | 48           | -23                  | -39                          | -27                   | -42                          | -23                 | -38                          | -23                 | -38                          | -24                 | -3                           | -21                 | -33                          |
| Missouri      | 50           | -14                  | -22                          | -16                   | -24                          | -15                 | -24                          | -15                 | -24                          | -16                 | -1                           | -12                 | 0                            |
| Montana       | 52           | -8                   | -17                          | -10                   | -19                          | -8                  | -17                          | -8                  | -17                          | -9                  | 0                            | -26                 | -43                          |
| Nebraska      | 54           | -35                  | -44                          | -37                   | -46                          | -36                 | -46                          | -33                 | -46                          | -36                 | -13                          | -10                 | 0                            |
| Nevada        | 54           | -15                  | -24                          | -16                   | -24                          | -16                 | -24                          | -16                 | -24                          | -16                 | -1                           | -17                 | -24                          |

|                |              | Mobility category    |                              |                       |                              |                     |                              |                     |                              |                     |                              |                     |                              |
|----------------|--------------|----------------------|------------------------------|-----------------------|------------------------------|---------------------|------------------------------|---------------------|------------------------------|---------------------|------------------------------|---------------------|------------------------------|
|                |              | Grocery and Pharmacy |                              | Retail and Recreation |                              | Transit Stations    |                              | Workplace           |                              | Residential         |                              | Parks               |                              |
| State          | Days of data | Minimal correlation  | Maximum positive correlation | Minimal correlation   | Maximum positive correlation | Minimal correlation | Maximum positive correlation | Minimal correlation | Maximum positive correlation | Minimal correlation | Maximum positive correlation | Minimal correlation | Maximum positive correlation |
| New Hampshire  | 55           | -21                  | -42                          | -26                   | -46                          | -22                 | -44                          | -22                 | -44                          | -23                 | -2                           | -35                 | -49                          |
| New Jersey     | 54           | -16                  | -36                          | -18                   | -36                          | -18                 | -36                          | -18                 | -36                          | -18                 | -2                           | -16                 | -27                          |
| New Mexico     | 53           | -26                  | -42                          | -28                   | -44                          | -25                 | -42                          | -26                 | -44                          | -27                 | -8                           | -26                 | -44                          |
| New York       | 55           | -14                  | -26                          | -15                   | -27                          | -15                 | -27                          | -15                 | -27                          | -15                 | 0                            | -16                 | -29                          |
| North Carolina | 50           | -25                  | -41                          | -28                   | -43                          | -24                 | -41                          | -23                 | -41                          | -24                 | -2                           | -21                 | -41                          |
| North Dakota   | 49           | -29                  | -41                          | -31                   | -42                          | -29                 | -42                          | -28                 | -42                          | -30                 | -12                          | -9                  | 0                            |
| Ohio           | 54           | -28                  | -37                          | -31                   | -39                          | -28                 | -39                          | -28                 | -39                          | -29                 | -5                           | -9                  | 0                            |
| Oklahoma       | 52           | -16                  | -22                          | -18                   | -23                          | -16                 | -23                          | -16                 | -23                          | -17                 | -1                           | 0                   | -49                          |
| Oregon         | 55           | -14                  | -21                          | -16                   | -22                          | -15                 | -22                          | -15                 | -22                          | -15                 | 0                            | -13                 | -37                          |
| Pennsylvania   | 53           | -19                  | -27                          | -20                   | -28                          | -20                 | -28                          | -20                 | -28                          | -20                 | -4                           | -21                 | -28                          |
| Rhode Island   | 58           | -25                  | -39                          | -28                   | -44                          | -27                 | -44                          | -27                 | -43                          | -28                 | -7                           | -22                 | -32                          |
| South Carolina | 55           | -16                  | -23                          | -19                   | -43                          | -18                 | -25                          | -18                 | -25                          | -18                 | 0                            | -18                 | -28                          |
| South Dakota   | 52           | -24                  | -33                          | -25                   | -34                          | -25                 | -33                          | -23                 | -33                          | -25                 | -8                           | -18                 | 0                            |
| Tennessee      | 51           | -32                  | -42                          | -35                   | -43                          | -30                 | -43                          | -30                 | -42                          | -32                 | -2                           | -21                 | -31                          |
| Texas          | 53           | -20                  | -40                          | -22                   | -44                          | -21                 | -43                          | -21                 | -30                          | -22                 | -4                           | -23                 | -45                          |
| Utah           | 50           | -29                  | -40                          | -32                   | -42                          | -20                 | -41                          | -20                 | -41                          | -31                 | -3                           | -4                  | 0                            |
| Vermont        | 52           | -8                   | -20                          | -9                    | -21                          | -8                  | -21                          | -8                  | -21                          | -8                  | 0                            | -14                 | -26                          |
| Virginia       | 54           | -27                  | -42                          | -29                   | -44                          | -28                 | -44                          | -28                 | -44                          | -28                 | -6                           | -27                 | -42                          |
| Washington     | 73           | -8                   | -24                          | -13                   | -27                          | -14                 | -28                          | -17                 | -27                          | -13                 | 0                            | -9                  | -37                          |
| West Virginia  | 49           | -16                  | -23                          | -18                   | -24                          | -16                 | -24                          | -15                 | -24                          | -16                 | 0                            | -9                  | -22                          |
| Wisconsin      | 55           | -22                  | -44                          | -23                   | -46                          | -22                 | -46                          | -22                 | -46                          | -22                 | -2                           | -10                 | 0                            |
| Wyoming        | 45           | -7                   | -40                          | -38                   | -40                          | -34                 | -40                          | -35                 | -40                          | -36                 | -28                          | -10                 | 0                            |
| minimum        | 45           | -35                  | -44                          | -38                   | -46                          | -36                 | -46                          | -35                 | -46                          | -36                 | -28                          | -39                 | -49                          |
| maximum        | 73           | -6                   | -15                          | -5                    | -15                          | -4                  | -14                          | -5                  | -15                          | -6                  | 0                            | 0                   | 0                            |
| median         | 53           | -21                  | -38                          | -23                   | -41                          | -22                 | -39                          | -22                 | -38                          | -23                 | -2                           | -18                 | -28                          |
| Q1             | 51           | -26                  | -42                          | -29                   | -44                          | -27                 | -43                          | -26                 | -44                          | -28                 | -5                           | -22                 | -40                          |
| Q3             | 54           | -14                  | -24                          | -17                   | -26                          | -16                 | -24                          | -16                 | -25                          | -16                 | 0                            | -12                 | -17                          |
| mean           | 53           | -20                  | -33                          | -23                   | -36                          | -21                 | -35                          | -21                 | -35                          | -22                 | -4                           | -18                 | -25                          |
| SD             | 4            | 8                    | 9                            | 8                     | 10                           | 8                   | 10                           | 7                   | 10                           | 8                   | 5                            | 8                   | 16                           |

**Supplemental Table 3: Summary of regression models testing time invariant predictors of cumulative SARS-CoV-2 cases**

Summary of Bayesian, negative binomial regression models testing non-time varying, state-level predictors of the total cumulative number of severe acute respiratory syndrome coronavirus 2 (SARS-CoV-2) cases per state at the end of the study period. IRR = Incidence Rate Ratios. CI = credible interval. n = number of observations in model. LOO IC = leave-one-out cross-validation information criterion. SE = standard error. \* 95% CI does not cross one.

| Predictors |                          |           |                         |    |                      |                |
|------------|--------------------------|-----------|-------------------------|----|----------------------|----------------|
| Model      | Variable                 | IRR       | 95% CI                  | n  | R <sup>2</sup> Bayes | LOO IC ± SE    |
| 0          | Intercept                | 21,571.81 | (15,152.51 – 32,132.44) | 50 | 0.00                 | 1,092.1 ± 27.8 |
| 1          | Intercept                | 13,047.48 | (9,945.00 – 17,657.83)  | 50 | 0.50                 | 1,055.1 ± 27.0 |
|            | Population size*         | 3.77      | (2.44 – 6.08)           |    |                      |                |
| 2          | Intercept                | 15,222.58 | (11,243.07 – 21,285.65) | 50 | 0.52                 | 1,070.0 ± 27.4 |
|            | Population density*      | 2.97      | (1.84 – 5.19)           |    |                      |                |
| 3          | Intercept                | 21,784.93 | (14,393.88 – 34,243.78) | 50 | 0.00                 | 1091.9 ± 27.6  |
|            | In poverty*              | 2.97      | (1.84 – 5.19)           |    |                      |                |
| 4          | Intercept                | 22,088.96 | (15,054.36 – 33,708.12) | 50 | 0.00                 | 1,091.8 ± 27.6 |
|            | Without health insurance | 0.72      | (0.10 – 5.25)           |    |                      |                |
| 5          | Intercept                | 24,392.73 | (9,328.74 – 64,157.17)  | 50 | 0.00                 | 1,091.7 ± 27.5 |
|            | Labor force: essential   | 0.77      | (0.11 – 5.59)           |    |                      |                |
| 6          | Intercept                | 21,535.80 | (14,971.78 – 32,458.07) | 50 | 0.00                 | 1,092.0 ± 27.8 |
|            | Labor force: health care | 1.01      | (0.14 – 6.92)           |    |                      |                |
| 7          | Intercept                | 1,851.35  | (453.21 – 8,750.64)     | 50 | 0.02                 | 1,074.2 ± 28.9 |
|            | Urban*                   | 19.12     | (3.04 – 106.43)         |    |                      |                |
| 8          | Intercept                | 1,171.95  | (503.56 – 3,278.89)     | 50 | 0.08                 | 1,052.8 ± 29.5 |
|            | Urban area*              | 53.22     | (12.77 – 180.82)        |    |                      |                |
| 9          | Intercept                | 25,051.45 | (17,200.56 – 37,136.16) | 50 | 0.00                 | 1,084.4 ± 28.9 |
|            | Urban cluster*           | 0.13      | (0.02 – 0.97)           |    |                      |                |
| 10         | Intercept                | 17,244.62 | (12,051.46 – 26,238.71) | 50 | 0.00                 | 1081.7 ± 24.6  |
|            | Population commuting*    | 8.29      | (1.41 – 49.34)          |    |                      |                |
| 11         | Intercept                | 14,237.04 | (10,731.18 – 19,591.39) | 50 | 0.52                 | 1,065.7 ± 25.0 |
|            | Transit ridership*       | 2.67      | (1.59 – 5.61)           |    |                      |                |
| 12         | Intercept                | 17,689.25 | (12,810.39 – 25,484.94) | 50 | 0.14                 | 1,083.3 ± 28.4 |
|            | Number of airports*      | 1.74      | (1.29 – 2.44)           |    |                      |                |
| 13         | Intercept                | 14,973.65 | (11,128.37 – 20,982.59) | 50 | 0.50                 | 1,067.0 ± 24.5 |
|            | Airline passenger count* | 2.86      | (1.87 – 4.62)           |    |                      |                |
| 14         | Intercept                | 13,416.74 | (7,157.39 – 25,842.78)  | 50 | 0.01                 | 1,086.5 ± 26.9 |
|            | Race: non-White          | 5.04      | (0.80 – 31.90)          |    |                      |                |
| 15         | Intercept                | 18,975.86 | (12,345.31 – 30,692.49) | 50 | 0.00                 | 1,090.0 ± 27.6 |
|            | Race: Black              | 2.54      | (0.38 – 16.73)          |    |                      |                |
| 16         | Intercept                | 17,983.16 | (11,546.89 – 29,186.62) | 50 | 0.00                 | 1,089.4 ± 27.7 |
|            | Race: Hispanic/Latino    | 3.12      | (0.51 – 18.24)          |    |                      |                |
| 17         | Intercept                | 21,627.19 | (15,259.14 – 32,059.77) | 50 | 0.00                 | 1,091.7 ± 27.8 |

| Predictors |                                |           |                         |    |                      |                |
|------------|--------------------------------|-----------|-------------------------|----|----------------------|----------------|
| Model      | Variable                       | IRR       | 95% CI                  | n  | R <sup>2</sup> Bayes | LOO IC ± SE    |
|            | Race: Indigenous American      | 0.66      | (0.10 – 4.66)           |    |                      |                |
| 18         | Intercept                      | 15,587.73 | (11,506.12 – 21,943.77) | 50 | 0.66                 | 1,067 ± 20.9   |
|            | Educational facilities*        | 1.99      | (1.44 – 3.31)           |    |                      |                |
| 19         | Intercept                      | 22,066.52 | (15,466.67 – 33,250.34) | 49 | 0.04                 | 1,074.1 ± 28.4 |
|            | Gathering restrictions         | 1.27      | (0.89 – 2.32)           |    |                      |                |
| 20         | Intercept                      | 17,523.44 | (12,493.48 – 25,766.35) | 38 | 0.68                 | 822.6 ± 20.7   |
|            | Stay-at-home order*            | 1.98      | (1.42 – 3.08)           |    |                      |                |
| 21         | Intercept                      | 18,543.75 | (13,309.80 – 26,924.58) | 47 | 0.47                 | 1,017.9 ± 22.7 |
|            | Business closure (any)*        | 2.25      | (1.43 – 4.03)           |    |                      |                |
| 22         | Intercept                      | 19,637.28 | (13,464.28 – 30,776.33) | 34 | 0.64                 | 741.1 ± 18     |
|            | Non-essential services closed* | 1.98      | (1.34 – 3.75)           |    |                      |                |
| 23         | Intercept                      | 1,142.79  | (460.62 – 3,295.88)     | 50 | 0.08                 | 1,017.9 ± 22.6 |
|            | Urban area*                    | 53.8      | (13.23 – 182.37)        |    |                      |                |
|            | In poverty                     | 1.22      | (0.18 – 8.56)           |    |                      |                |
| 24         | Intercept                      | 1,324.97  | (638.16 – 3,097.43)     | 50 | 0.30                 | 741.1 ± 18     |
|            | Urban area*                    | 36.47     | (10.83 – 107.26)        |    |                      |                |
|            | Number of airports*            | 1.68      | (1.30 – 2.22)           |    |                      |                |

**Supplemental Table 4: Summary of regression models testing association between mobility and daily SARS-CoV-2 cases**

Summary of negative binomial mixed effect regression models testing lagged, time-varying mobility measures as predictors of the daily count of severe acute respiratory syndrome coronavirus 2 (SARS-CoV-2) cases. Mobility predictors were lagged so that mobility and the number of daily cases were maximally correlated, resulting in individual lag times per state and per mobility category. Time invariant predictors included the proportion of the population living in an urban and the number of airports in each state. The state was used as a random intercept and the number of days since a state ran 10 tests was used as the random slope. IRR = Incidence Rate Ratios. CI = credible interval. ICC = intraclass correlation coefficient. N = number of states included as random intercepts. n = number of daily observations in model. LOO IC = leave-one-out cross-validation information criterion. SE = standard error. \* 95% CI does not cross one.

| Predictors |                      | Random Effects |                   |             |             |      |    |       |             |                |                      |
|------------|----------------------|----------------|-------------------|-------------|-------------|------|----|-------|-------------|----------------|----------------------|
| Model      | Variable             | IRR            | 95% HDI           | $\sigma^2$  | $\tau_{00}$ | ICC  | N  | n     | Marginal R2 | Conditional R2 | LOOIC $\pm$ SE       |
| 0          | Intercept            | 32.72          | (14.97 – 75.42)   | 3,299,469.5 | 546.7       | 1    | 50 | 2,655 | 0.00        | 0.69           | 29,548.9 $\pm$ 188.2 |
| 7          | Intercept            | 175.38         | (114.84 – 272.18) | 1,927,850.2 | 757.1       | 1    | 50 | 972   | 0.00        | 0.99           | 8,786.0 $\pm$ 107.4  |
|            | Grocery/ Pharmacy*   | 2.24           | (2.01 – 2.50)     |             |             |      |    |       |             |                |                      |
| 8          | Intercept            | 31.90          | (13.48 – 82.15)   | 1,913,665.0 | 13,699.6    | 0.99 | 50 | 972   | 0.01        | 0.99           | 8,786.7 $\pm$ 107.5  |
|            | Urban area*          | 17.80          | (4.00 – 69.45)    |             |             |      |    |       |             |                |                      |
|            | Grocery/ Pharmacy*   | 2.25           | (2.01 – 2.50)     |             |             |      |    |       |             |                |                      |
| 9          | Intercept            | 36.85          | (16.04 – 93.75)   | 1,866,772.7 | 49,070.1    | 0.97 | 50 | 972   | 0.03        | 0.99           | 8,787.2 $\pm$ 107.5  |
|            | Urban area*          | 14.18          | (3.28 – 53.18)    |             |             |      |    |       |             |                |                      |
|            | Number of airports*  | 1.44           | (1.04 – 2.04)     |             |             |      |    |       |             |                |                      |
|            | Grocery/ Pharmacy*   | 2.25           | (2.02 – 2.51)     |             |             |      |    |       |             |                |                      |
| 10         | Intercept            | 209.34         | (131.51 – 326.61) | 2,075,859.0 | 585.5       | 1    | 50 | 858   | 0.00        | 0.99           | 7,624.1 $\pm$ 99.3   |
|            | Retail/ Recreation * | 1.46           | (1.31 – 1.61)     |             |             |      |    |       |             |                |                      |
| 11         | Intercept            | 38.61          | (16.00 – 101.65)  | 2,060,046.6 | 14,609.2    | 0.99 | 50 | 858   | 0.01        | 0.99           | 7,623.6 $\pm$ 99.3   |
|            | Urban area*          | 16.52          | (3.70 – 64.10)    |             |             |      |    |       |             |                |                      |
|            | Retail/ Recreation*  | 1.46           | (1.32 – 1.61)     |             |             |      |    |       |             |                |                      |
| 12         | Intercept            | 44.15          | (17.93 – 115.94)  | 2,016,243.2 | 47,027.5    | 0.98 | 50 | 858   | 0.03        | 0.99           | 7,623.6 $\pm$ 99.3   |
|            | Urban area*          | 13.33          | (3.03 – 54.99)    |             |             |      |    |       |             |                |                      |
|            | Number of airports   | 1.40           | (0.99 – 1.99)     |             |             |      |    |       |             |                |                      |
|            | Retail/ Recreation*  | 1.46           | (1.32 – 1.62)     |             |             |      |    |       |             |                |                      |
| 13         | Intercept            | 210.74         | (135.24 – 327.67) | 1,967,749.3 | 615.5       | 1    | 50 | 914   | 0.00        | 0.99           | 8,105.4 $\pm$ 100.7  |
|            | Transit Stations*    | 1.46           | (1.28 – 1.66)     |             |             |      |    |       |             |                |                      |
| 14         | Intercept            | 38.17          | (15.92 – 100.03)  | 1,951,329.6 | 14,271.0    | 0.99 | 50 | 914   | 0.01        | 0.99           | 8,105.0 $\pm$ 100.7  |
|            | Urban area*          | 17.49          | (3.96 – 67.41)    |             |             |      |    |       |             |                |                      |



| Model | Predictors          |              |                                | Random Effects |             |      |    |       |             |                |                      |
|-------|---------------------|--------------|--------------------------------|----------------|-------------|------|----|-------|-------------|----------------|----------------------|
|       | Variable            | IRR          | 95% HDI                        | $\sigma^2$     | $\tau_{00}$ | ICC  | N  | n     | Marginal R2 | Conditional R2 | LOOIC $\pm$ SE       |
| 15    | Transit Stations*   | 1.46         | (1.28 – 1.66)                  | 1,910,585.1    | 44,880.9    | 0.98 | 50 | 914   | 0.03        | 0.99           | 8,106.4 $\pm$ 100.7  |
|       | Intercept           | 43.61        | (17.81 – 116.12)               |                |             |      |    |       |             |                |                      |
|       | Urban area*         | 14.19        | (3.11 – 56.05)                 |                |             |      |    |       |             |                |                      |
|       | Number of airports  | 1.39         | (0.97 – 1.99)                  |                |             |      |    |       |             |                |                      |
| 16    | Transit Stations*   | 1.46         | (1.28 – 1.66)                  | 1,959,394.8    | 649.8       | 1    | 50 | 916   | 0.00        | 0.99           | 8,179.0 $\pm$ 100.5  |
|       | Intercept           | 207.85       | (134.09 – 318.84)              |                |             |      |    |       |             |                |                      |
| 17    | Workplace*          | 1.72         | (1.51 – 1.96)                  | 1,943,803.0    | 13,775.1    | 0.99 | 50 | 916   | 0.01        | 0.99           | 8,178.9 $\pm$ 100.4  |
|       | Intercept           | 39.93        | (16.53 – 102.81)               |                |             |      |    |       |             |                |                      |
|       | Urban area*         | 16.24        | (3.73 – 64.12)                 |                |             |      |    |       |             |                |                      |
| 18    | Workplace*          | 1.72         | (1.51 – 1.96)                  | 1,893,857.0    | 53,098.6    | 0.97 | 50 | 916   | 0.03        | 0.99           | 8,178.4 $\pm$ 100.4  |
|       | Intercept           | 46.52        | (19.24 – 121.71)               |                |             |      |    |       |             |                |                      |
|       | Urban area*         | 12.54        | (2.84 – 50.29)                 |                |             |      |    |       |             |                |                      |
|       | Number of airports* | 1.45         | (1.02 – 2.08)                  |                |             |      |    |       |             |                |                      |
| 4     | Workplace*          | 1.72         | (1.51 – 1.97)                  | 1,158,622.1    | 8,552.5     | 0.99 | 50 | 2,445 | 0.01        | 0.95           | 24,600.7 $\pm$ 182   |
|       | Intercept           | 8.01         | (4.80 – 13.12)                 |                |             |      |    |       |             |                |                      |
| 5     | Residential *       | 8,182,226.08 | (5,525,456.16 – 11,957,313.16) | 1,129,295.2    | 32,371.6    | 0.97 | 50 | 2,445 | 0.03        | 0.95           | 24,600.5 $\pm$ 182   |
|       | Intercept           | 2.08         | (0.93 – 4.88)                  |                |             |      |    |       |             |                |                      |
|       | Urban area*         | 10.19        | (2.87 – 34.08)                 |                |             |      |    |       |             |                |                      |
| 6     | Residential*        | 8,124,185.58 | (5,486,830.03 – 11,883,576.39) | 1,082,365.3    | 71,067.8    | 0.94 | 50 | 2,445 | 0.07        | 0.95           | 24,601.4 $\pm$ 182   |
|       | Intercept           | 2.39         | (1.12 – 5.60)                  |                |             |      |    |       |             |                |                      |
|       | Urban area*         | 7.15         | (2.02 – 22.82)                 |                |             |      |    |       |             |                |                      |
|       | Number of airports* | 1.53         | (1.14 – 2.07)                  |                |             |      |    |       |             |                |                      |
| 1     | Residential*        | 8,051,575.63 | (5,488,097.66 – 11,874,990.68) | 1,493,708.6    | 4,090.8     | 1    | 50 | 1,383 | 0.00        | 0.98           | 14,547.8 $\pm$ 142.3 |
|       | Intercept           | 180.48       | (108.34 – 298.33)              |                |             |      |    |       |             |                |                      |
| 2     | Parks               | 1.04         | (0.90 – 1.19)                  | 1,462,541.9    | 21,176.1    | 0.99 | 50 | 1,383 | 0.01        | 0.98           | 14,547.3 $\pm$ 142.3 |
|       | Intercept           | 27.29        | (10.71 – 74.63)                |                |             |      |    |       |             |                |                      |
|       | Urban area*         | 23.39        | (4.85 – 97.00)                 |                |             |      |    |       |             |                |                      |
| 3     | Parks               | 1.04         | (0.90 – 1.20)                  | 1,398,805.2    | 61,954.5    | 0.96 | 50 | 1,383 | 0.04        | 0.98           | 14,547.1 $\pm$ 142.4 |
|       | Intercept           | 31.22        | (12.30 – 84.58)                |                |             |      |    |       |             |                |                      |
|       | Urban area*         | 18.42        | (3.93 – 76.49)                 |                |             |      |    |       |             |                |                      |
|       | Number of airports* | 1.52         | (1.04 – 2.27)                  |                |             |      |    |       |             |                |                      |
|       | Parks               | 1.04         | (0.90 – 1.20)                  |                |             |      |    |       |             |                |                      |

### **Supplemental Figure 1: Daily number of SARS-CoV-2 cases and changes in mobility relative to baseline by state**

Plots showing the daily number of severe acute respiratory syndrome coronavirus 2 (SARS-CoV-2) cases (seven-day centered means) and changes in mobility from baseline as measured by anonymized location data aggregated from mobile phones (seven-day centered means; non-lagged). The study period for each state began on the first date it reported results from  $\geq 10$  cumulative tests (as shown by the black line of each plot). Mobility data is shown prior to the start of the study period to demonstrate early behavior changes. Vertical lines denote the date on which government issued social distancing orders were put into place. These include the closure of educational facilities (“Educational”), restriction of large gatherings (“Gatherings”), closure of any businesses (“Businesses”), closure of all nonessential businesses (“Nonessential”), and stay-at-home orders (“Stay-at-home”). Note: The right-sided y-axis for cases varies by state to highlight the shape of the individual epidemic curves.

# Alabama

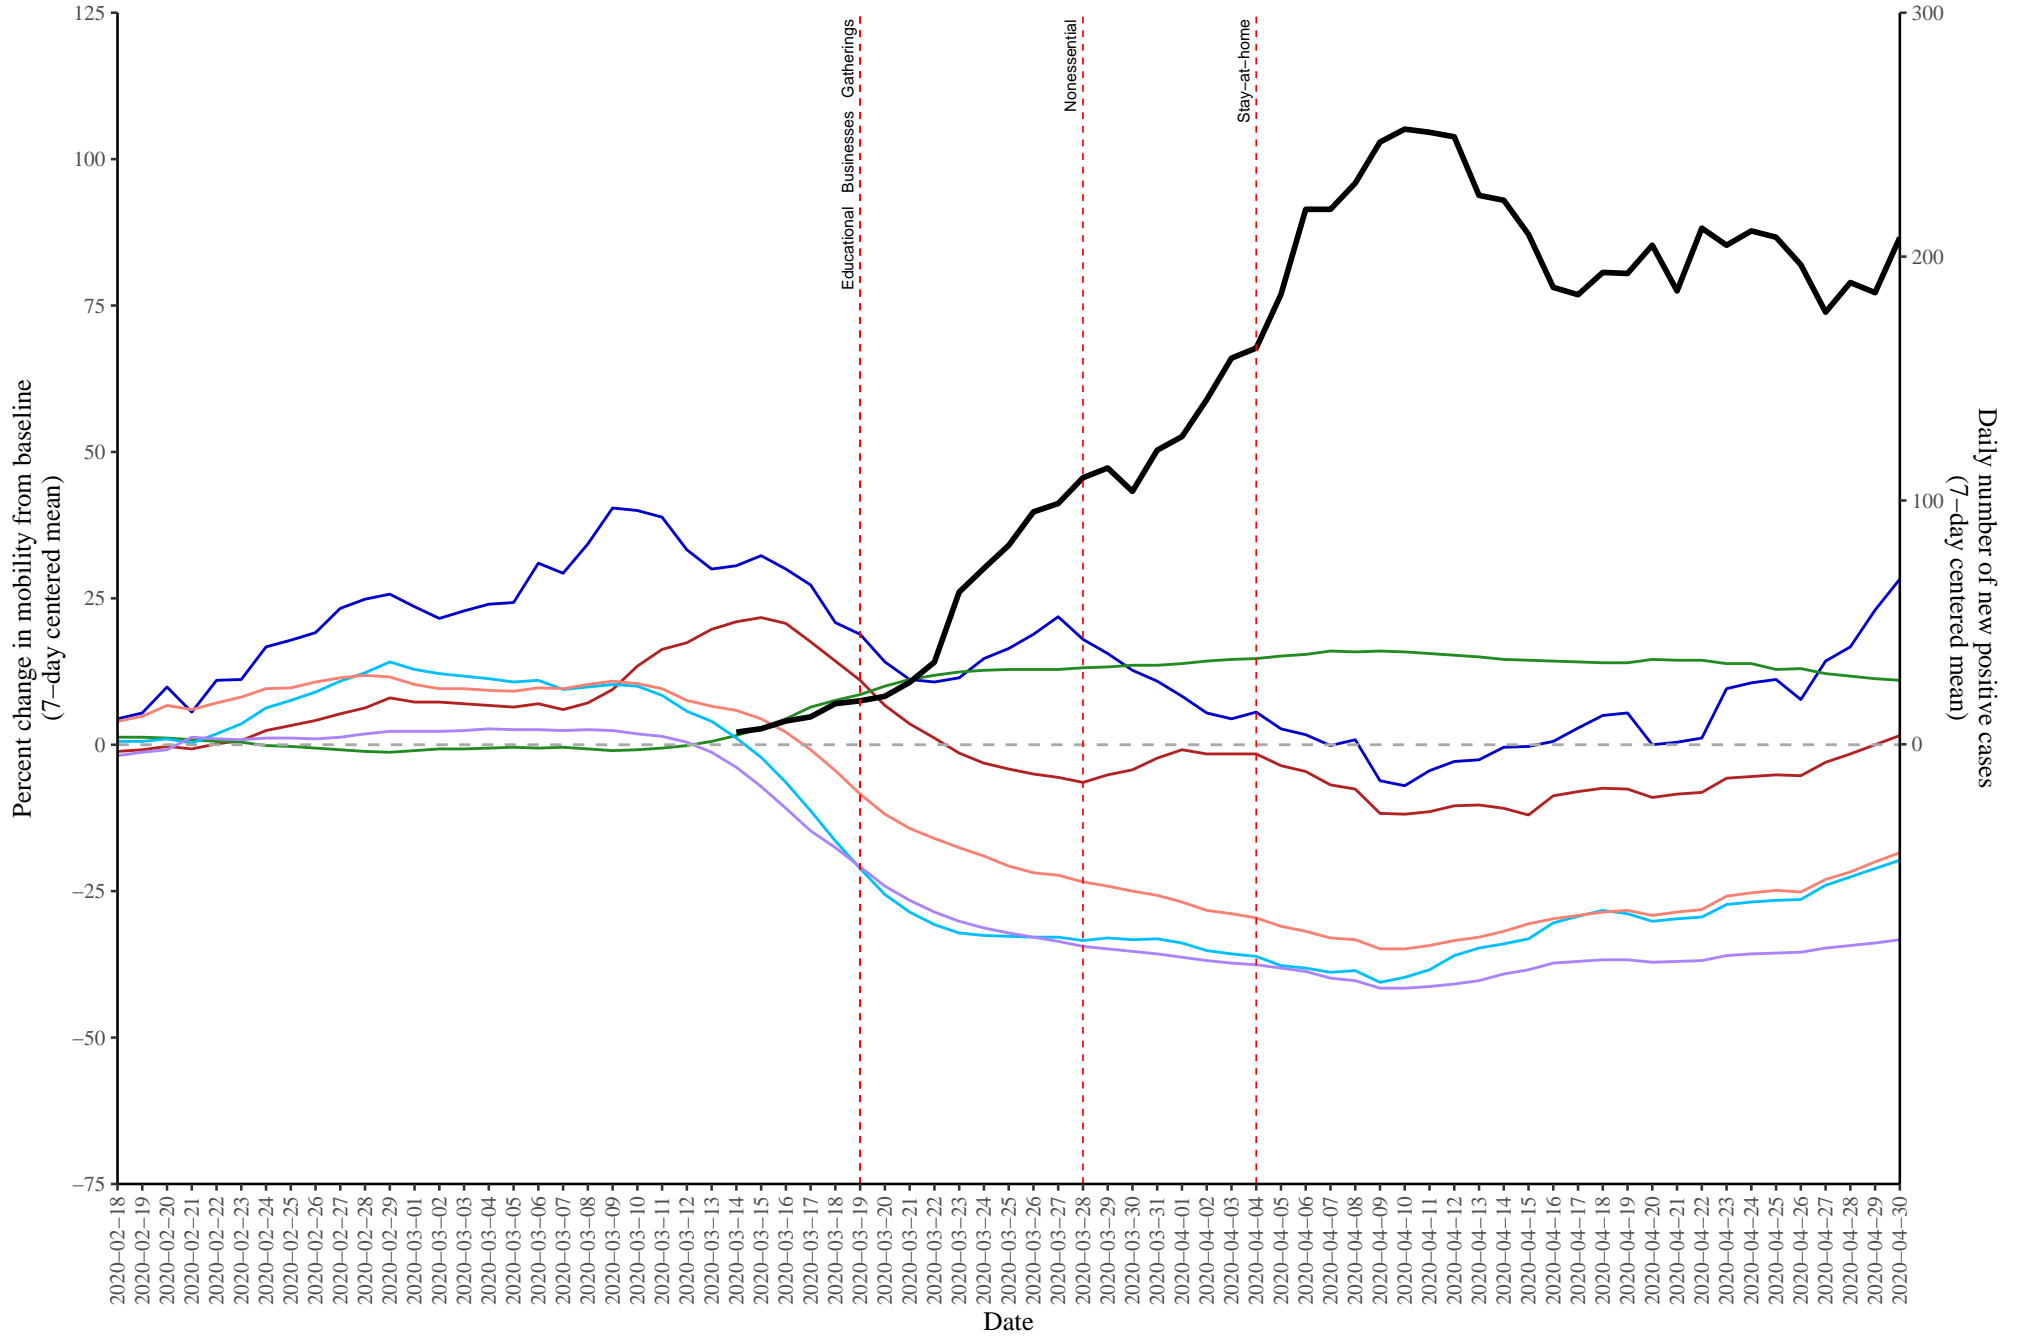

- Parks mobility
- Residential mobility
- Transit stations mobility
- SARS-CoV-2 Cases
- Grocery and pharmacy mobility
- Retail and recreation mobility
- Workplace mobility

# Alaska

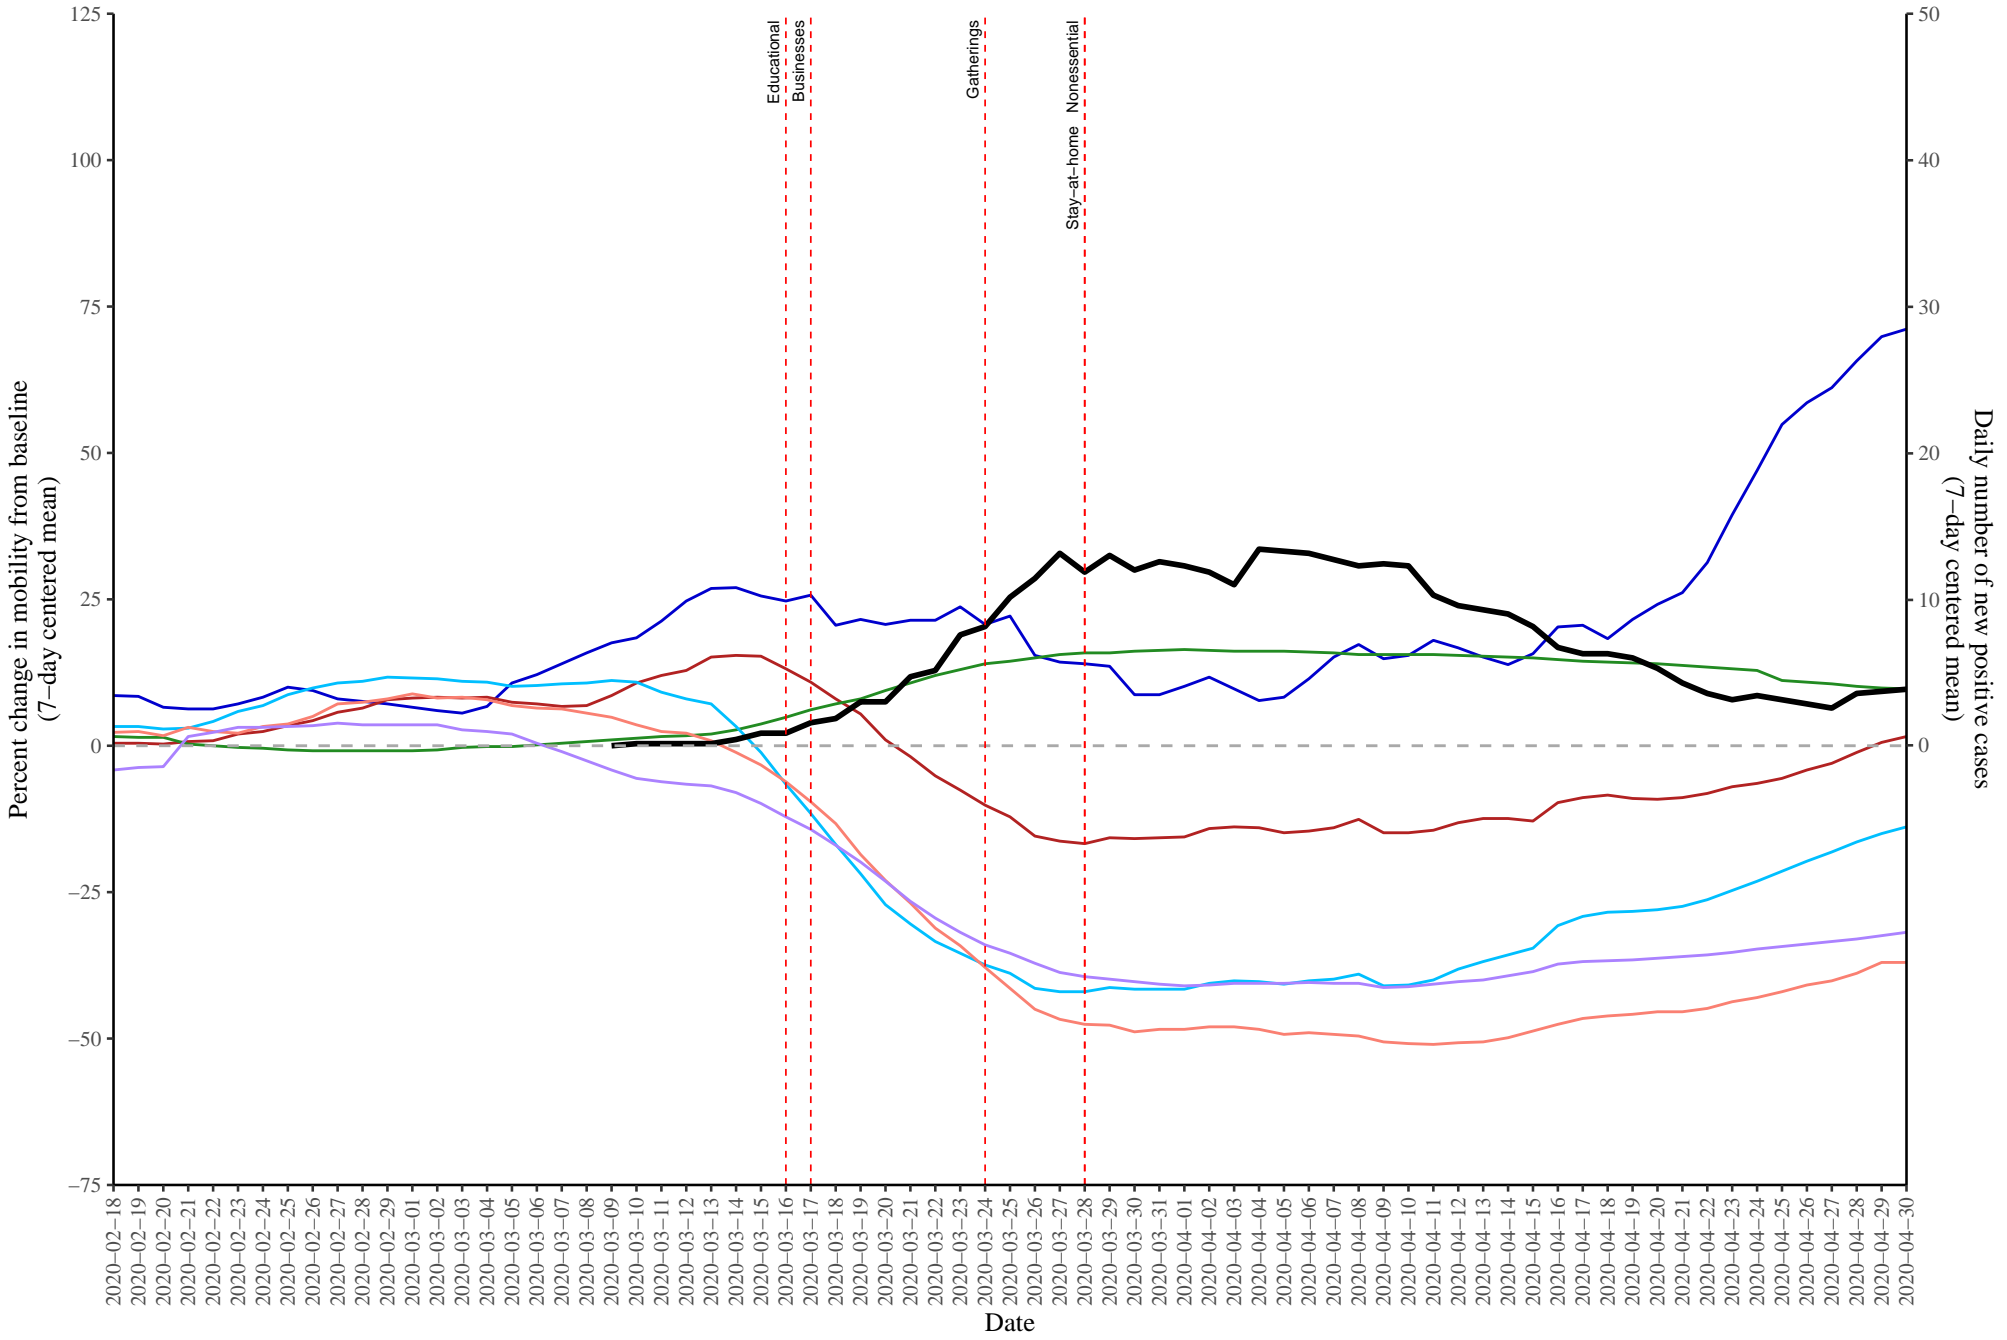

- Parks mobility
- Residential mobility
- Transit stations mobility
- SARS-CoV-2 Cases
- Grocery and pharmacy mobility
- Retail and recreation mobility
- Workplace mobility

# Arizona

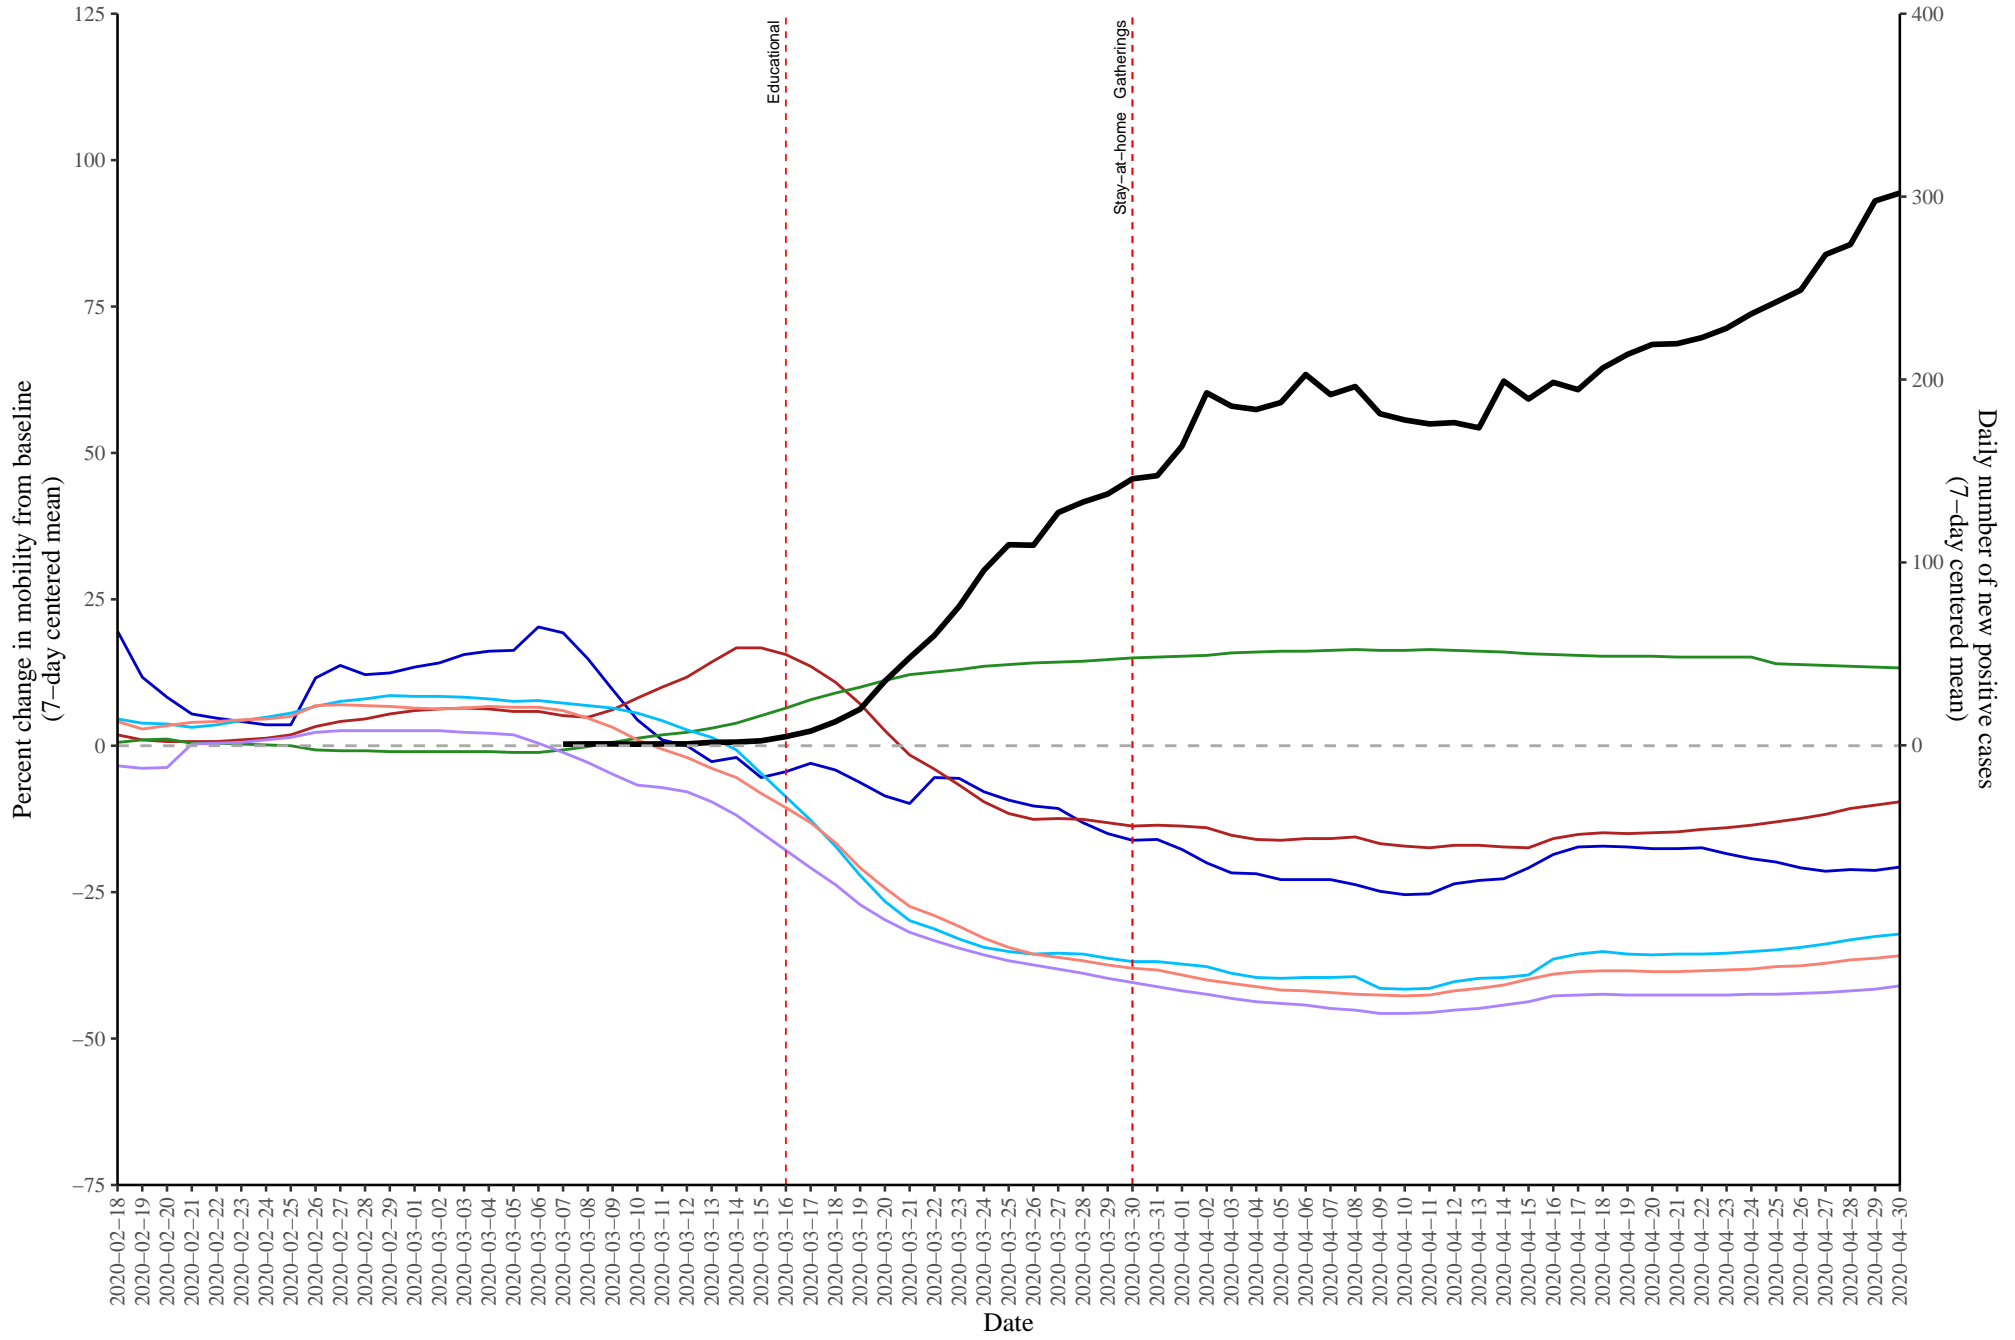

- Parks mobility
- Residential mobility
- Transit stations mobility
- SARS-CoV-2 Cases
- Grocery and pharmacy mobility
- Retail and recreation mobility
- Workplace mobility

# Arkansas

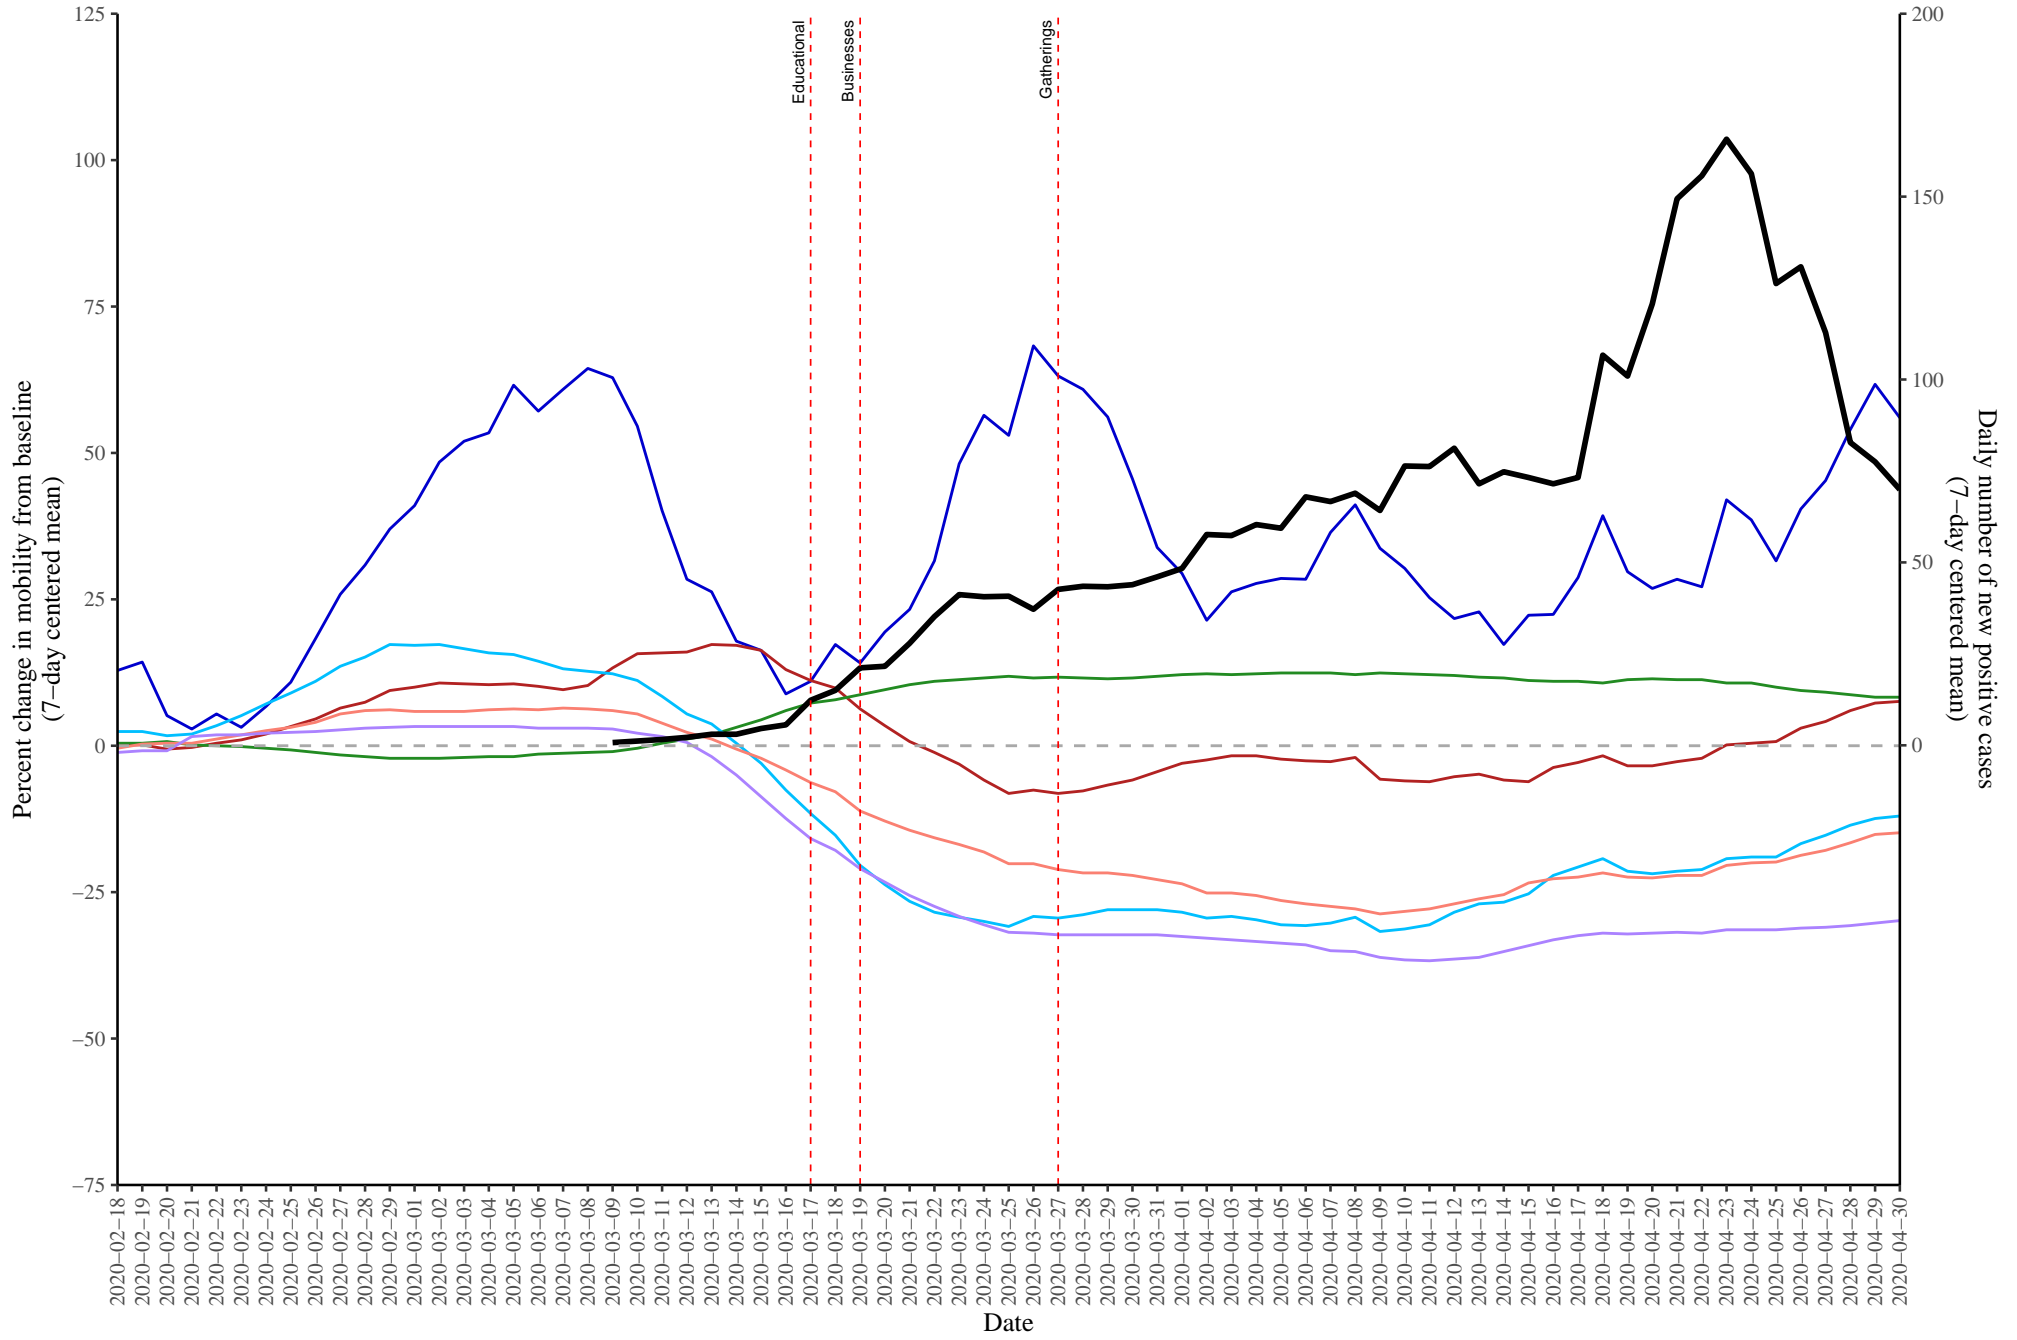

- Parks mobility
- Residential mobility
- Transit stations mobility
- SARS-CoV-2 Cases
- Grocery and pharmacy mobility
- Retail and recreation mobility
- Workplace mobility

# California

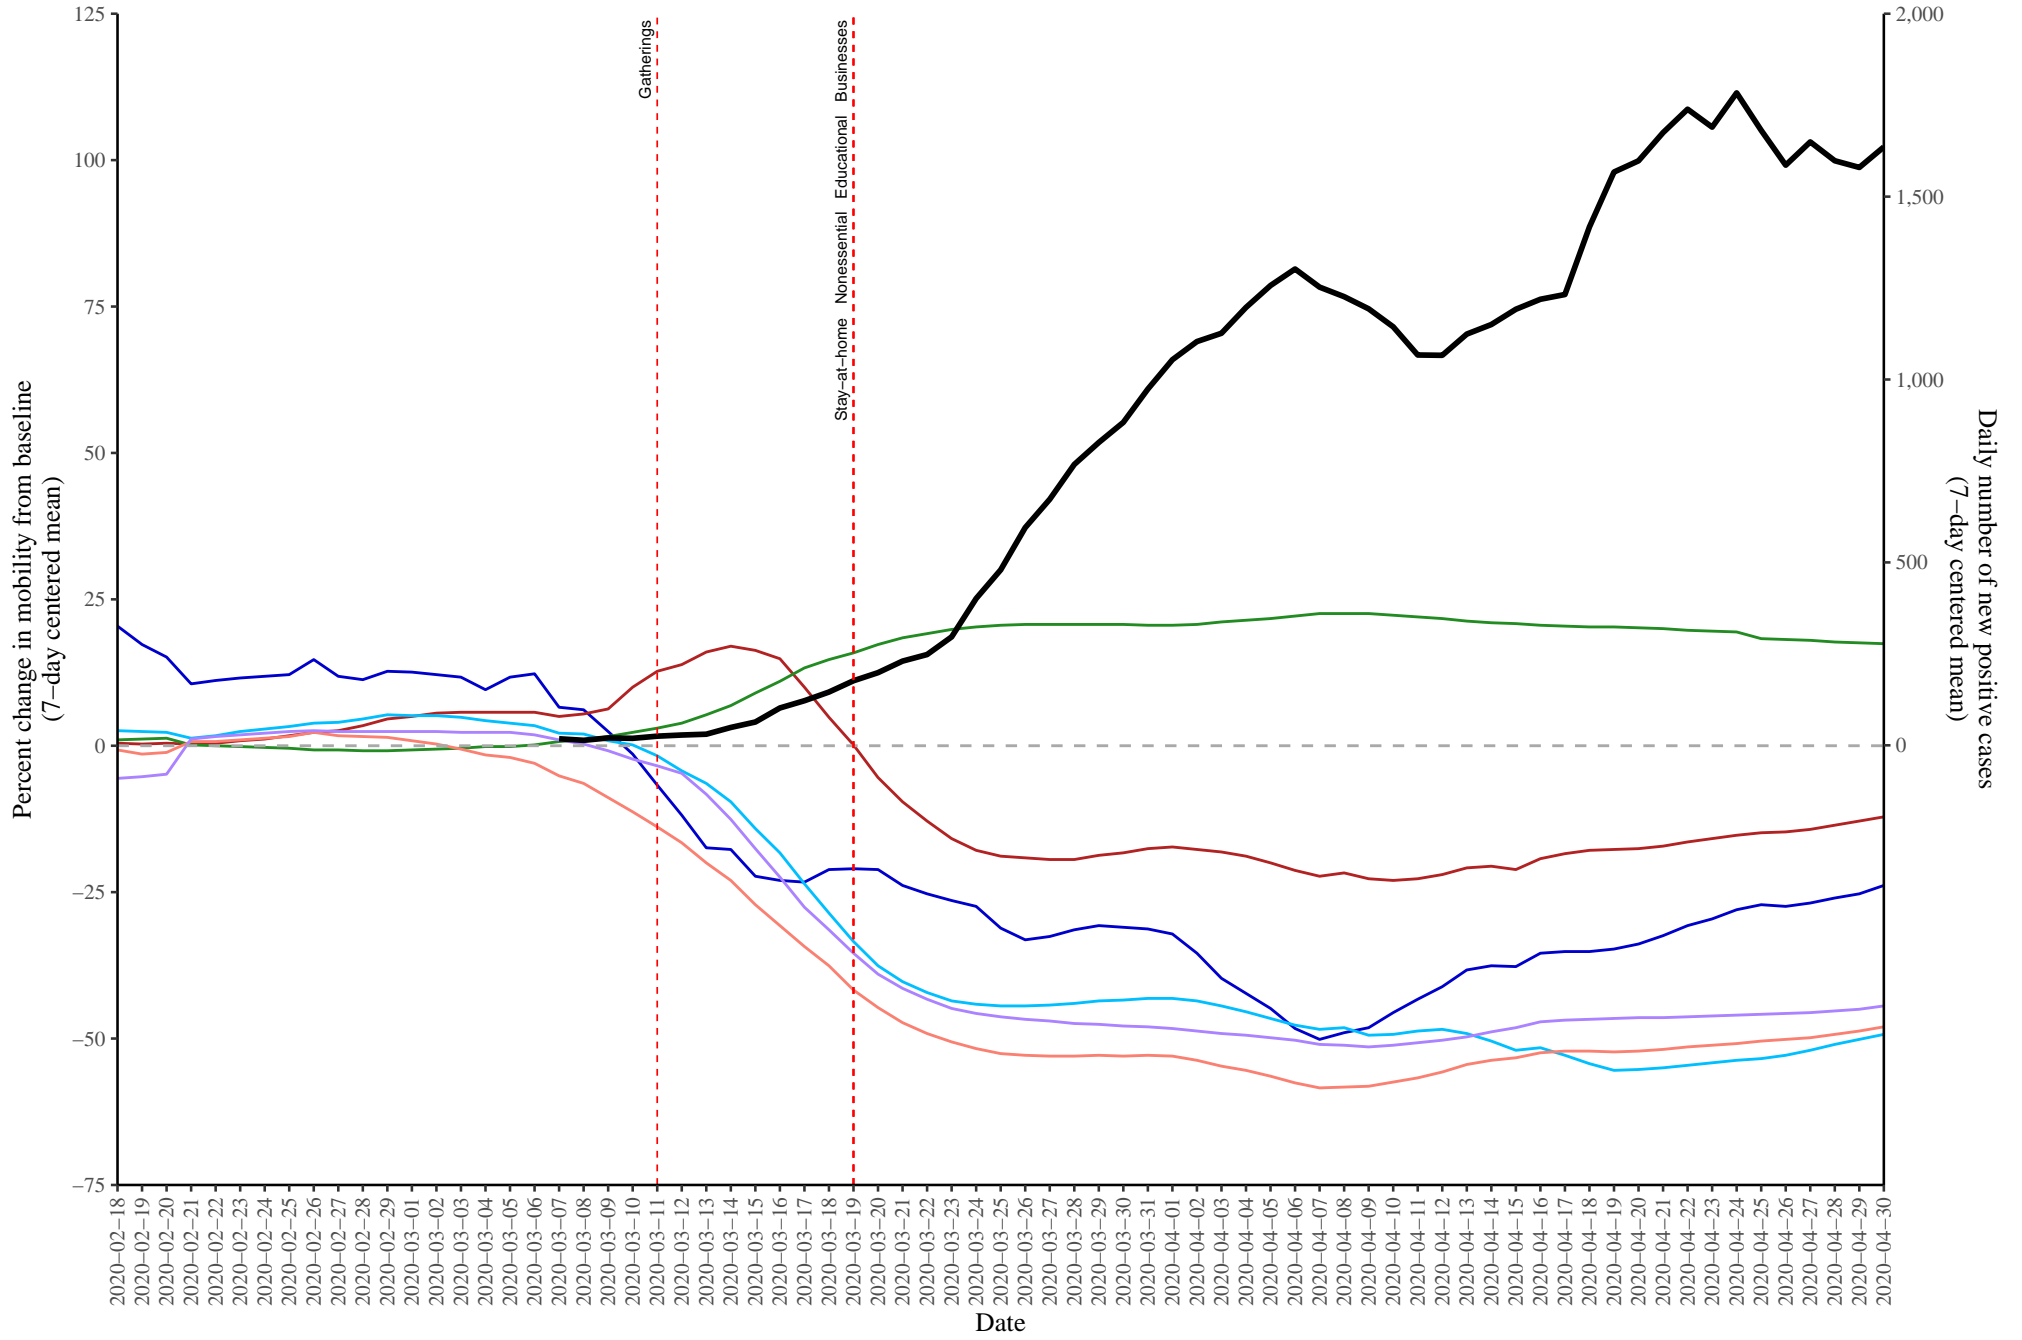

- Parks mobility
- Residential mobility
- Grocery and pharmacy mobility
- SARS-CoV-2 Cases
- Transit stations mobility
- Retail and recreation mobility
- Workplace mobility

# Colorado

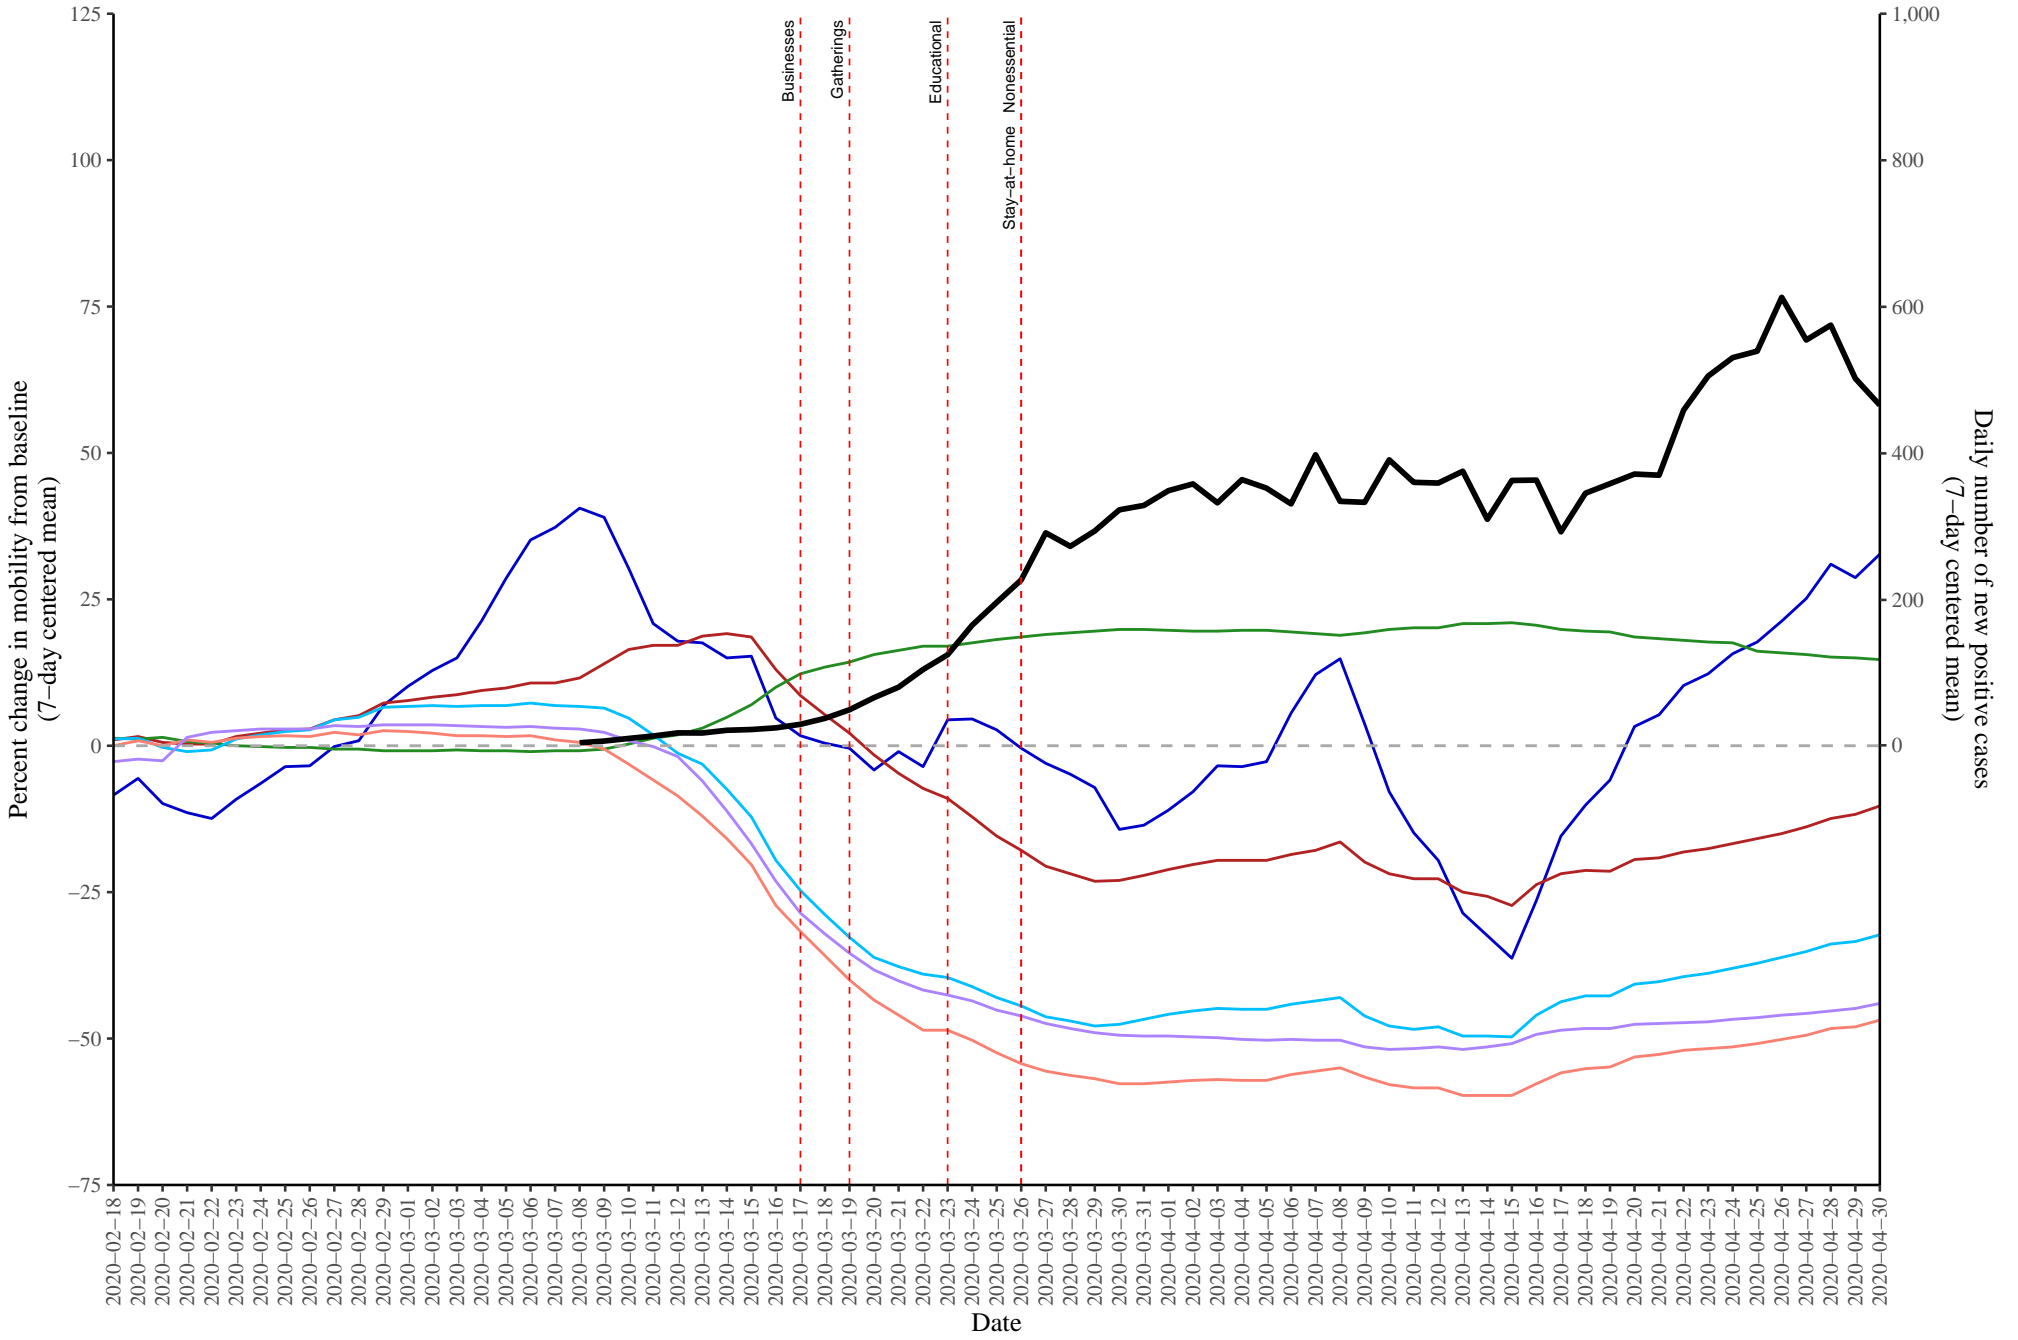

- Parks mobility
- Residential mobility
- Transit stations mobility
- SARS-CoV-2 Cases
- Grocery and pharmacy mobility
- Retail and recreation mobility
- Workplace mobility



# Connecticut

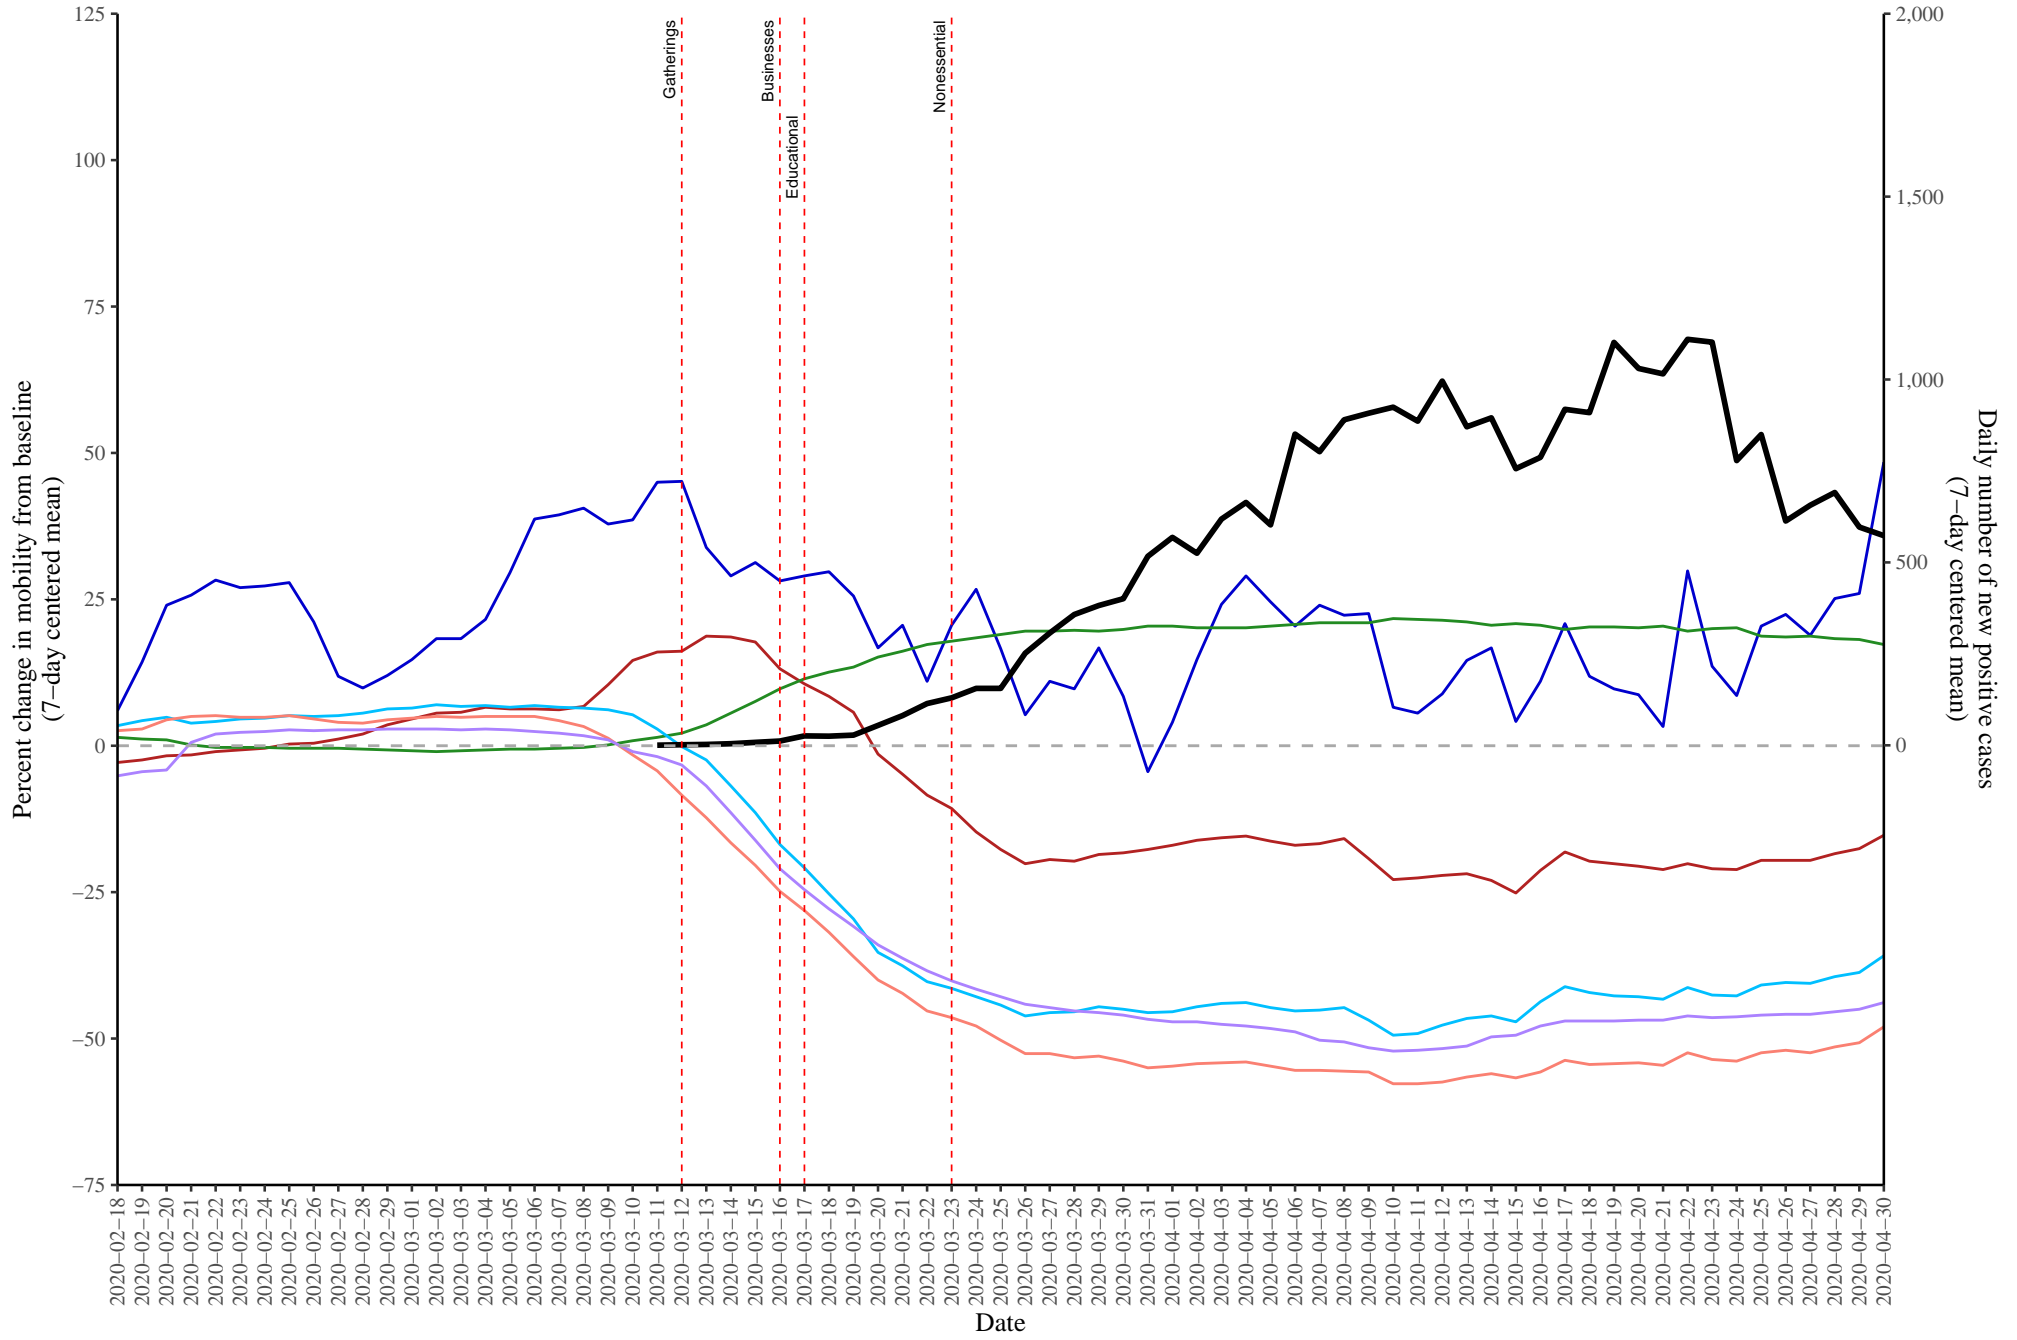

- Parks mobility
- Residential mobility
- Transit stations mobility
- SARS-CoV-2 Cases
- Grocery and pharmacy mobility
- Retail and recreation mobility
- Workplace mobility

# Delaware

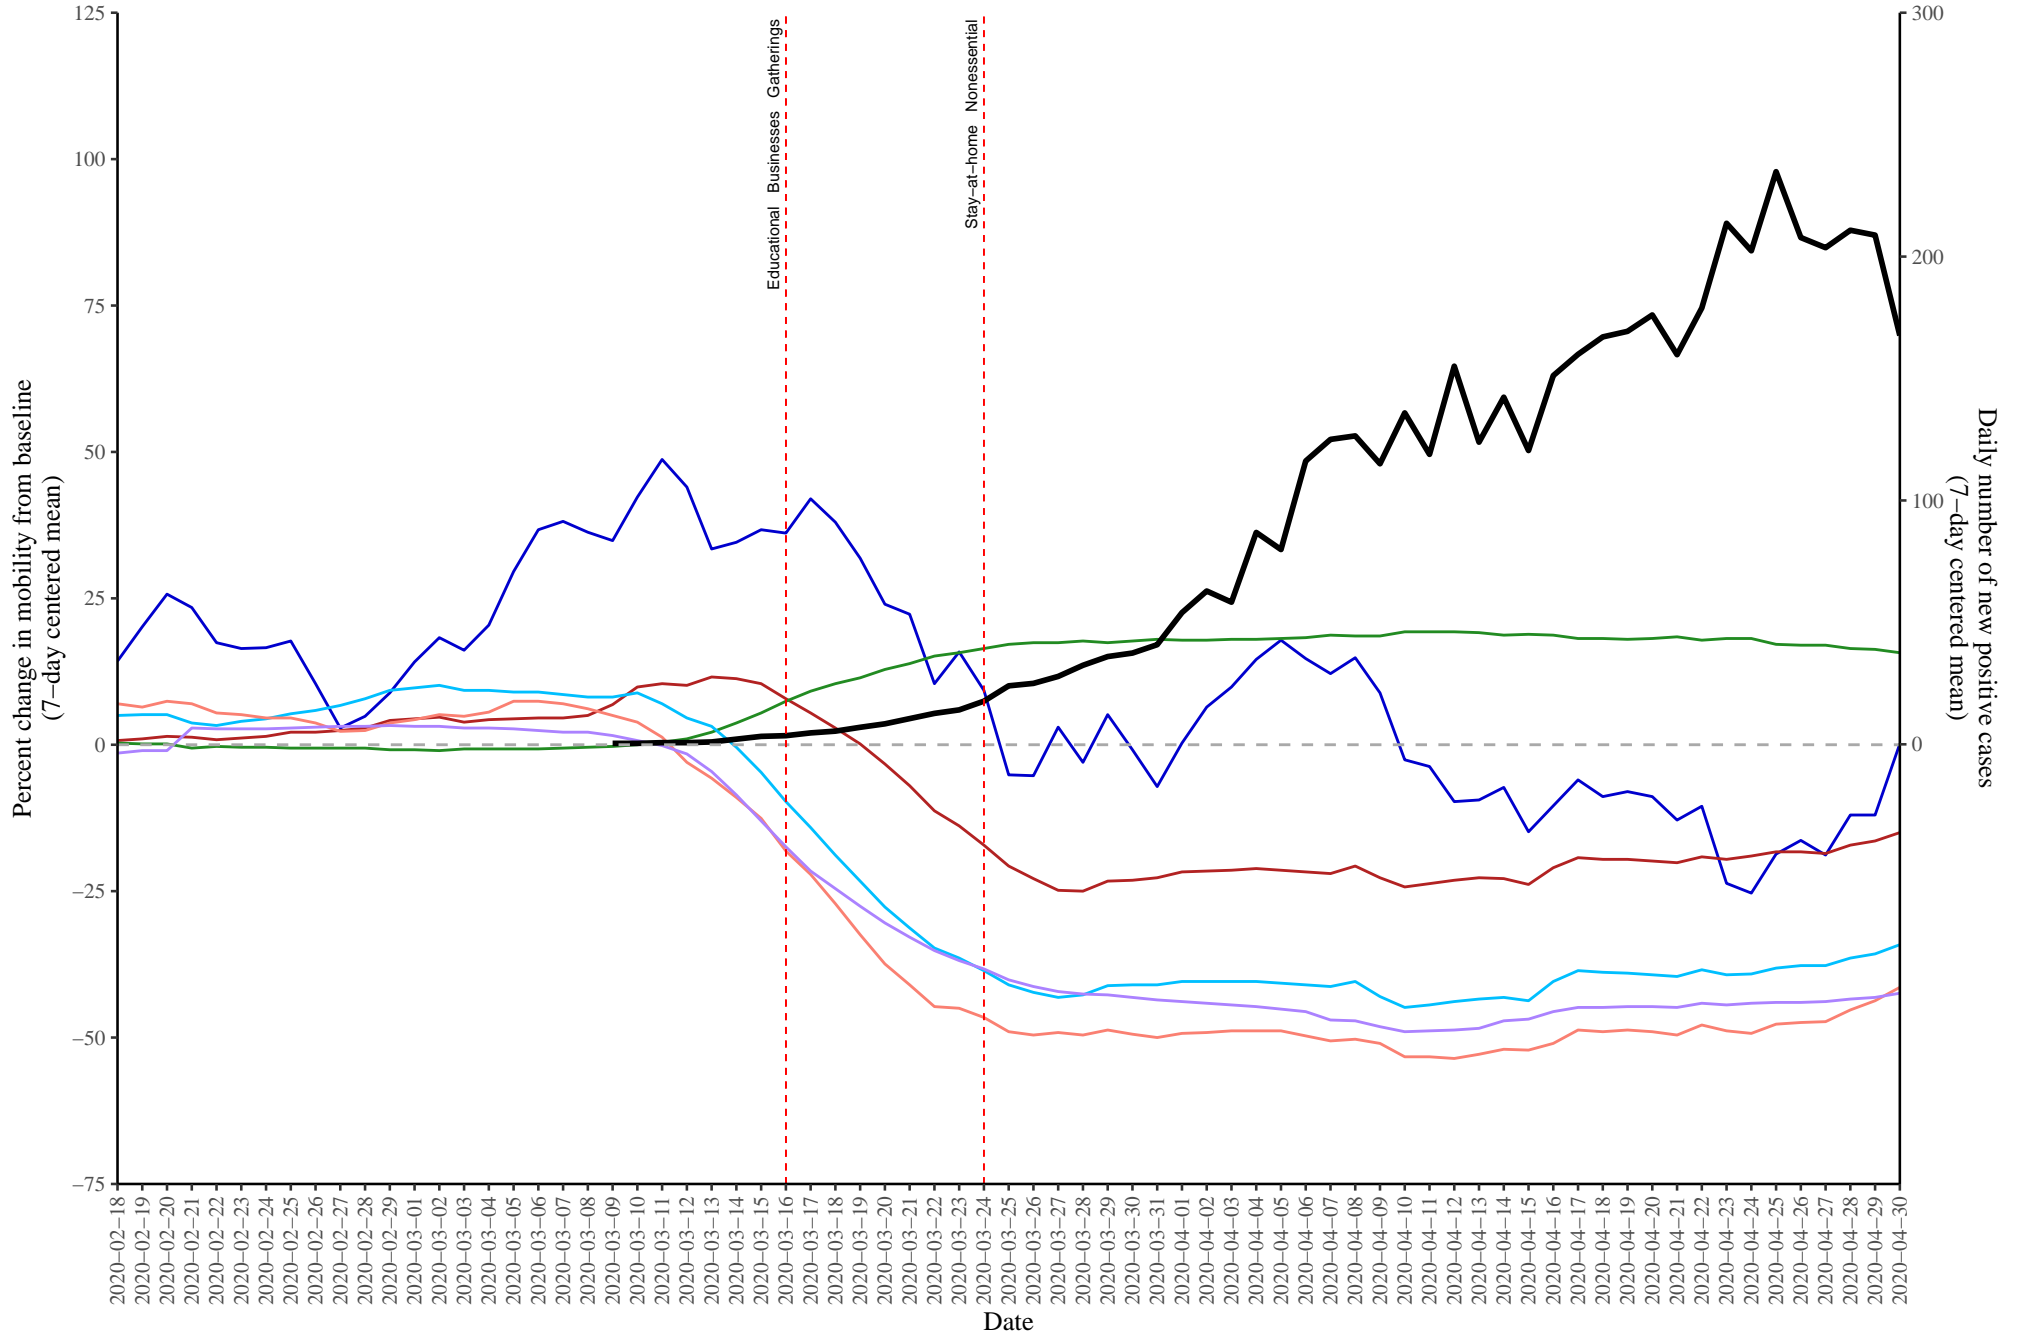

- Parks mobility
- Residential mobility
- Transit stations mobility
- SARS-CoV-2 Cases
- Grocery and pharmacy mobility
- Retail and recreation mobility
- Workplace mobility

# Florida

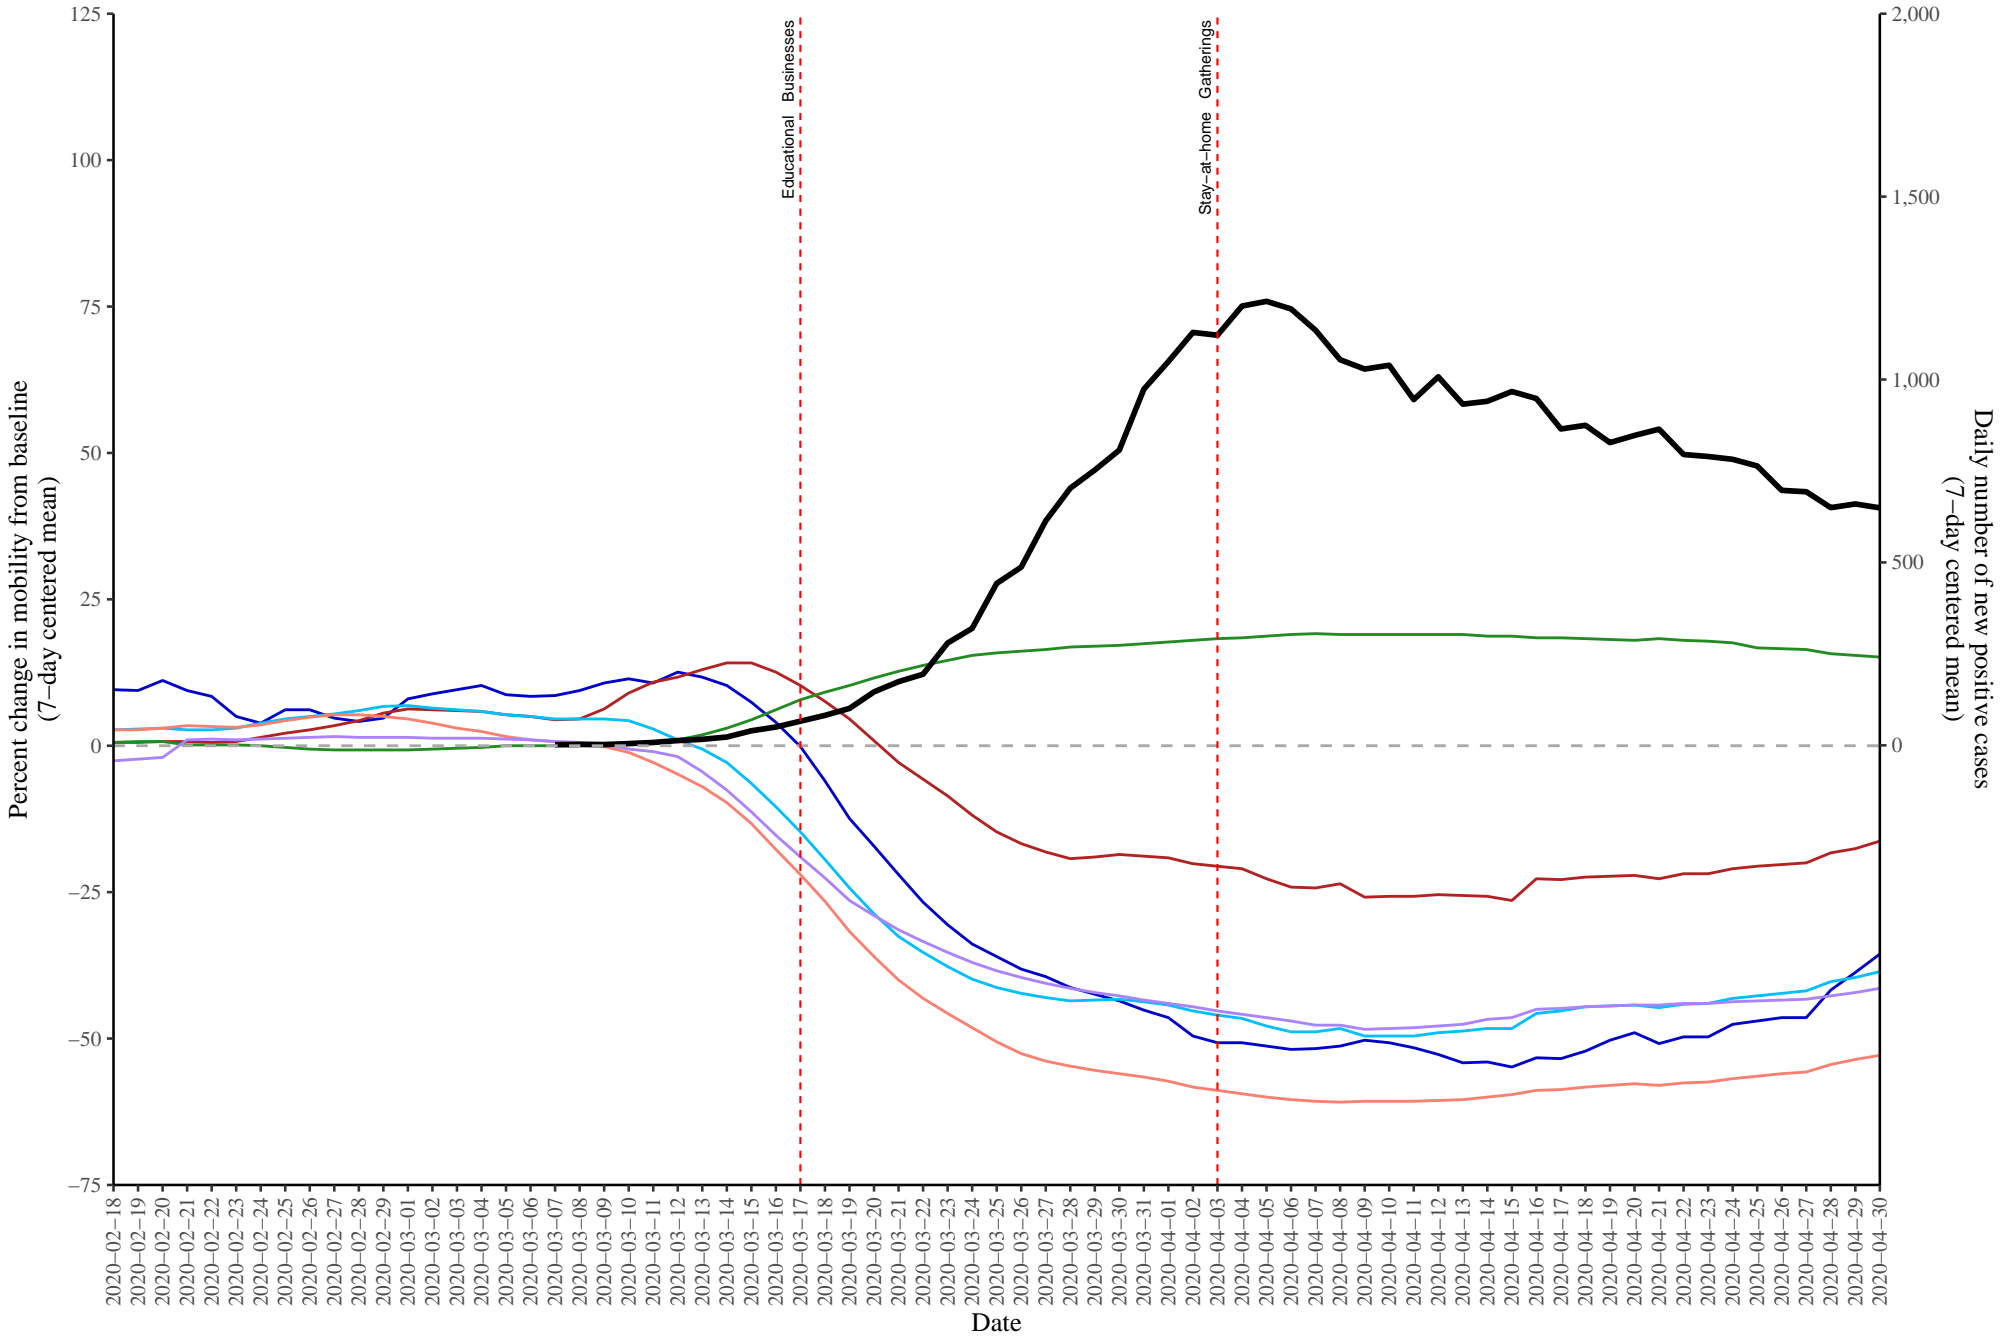

- Parks mobility
- Residential mobility
- Transit stations mobility
- SARS-CoV-2 Cases
- Grocery and pharmacy mobility
- Retail and recreation mobility
- Workplace mobility

# Georgia

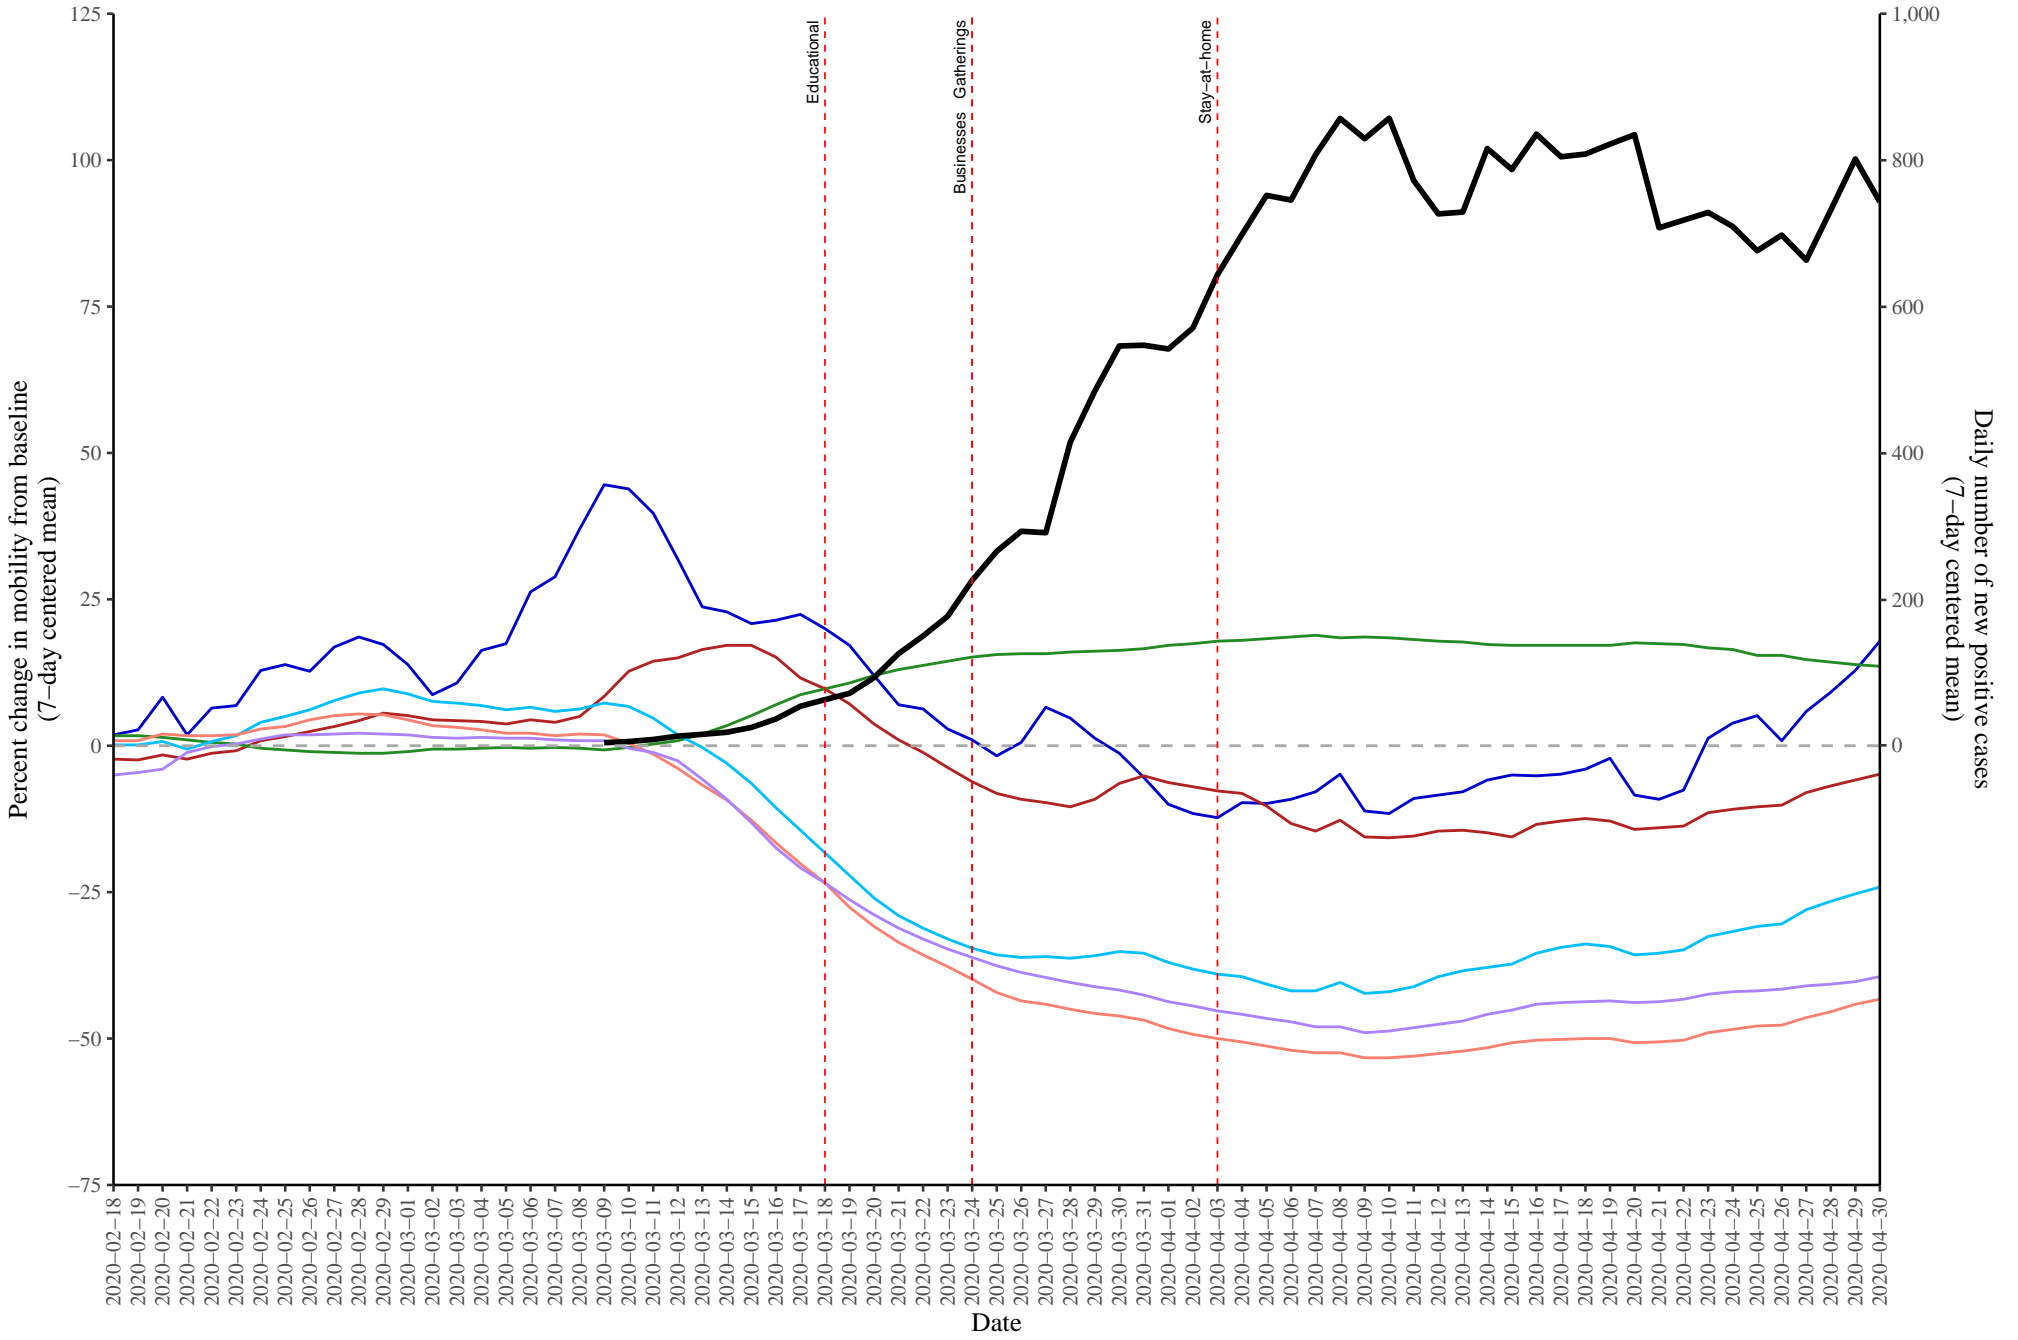

- Parks mobility
- Residential mobility
- Transit stations mobility
- SARS-CoV-2 Cases
- Grocery and pharmacy mobility
- Retail and recreation mobility
- Workplace mobility

# Hawaii

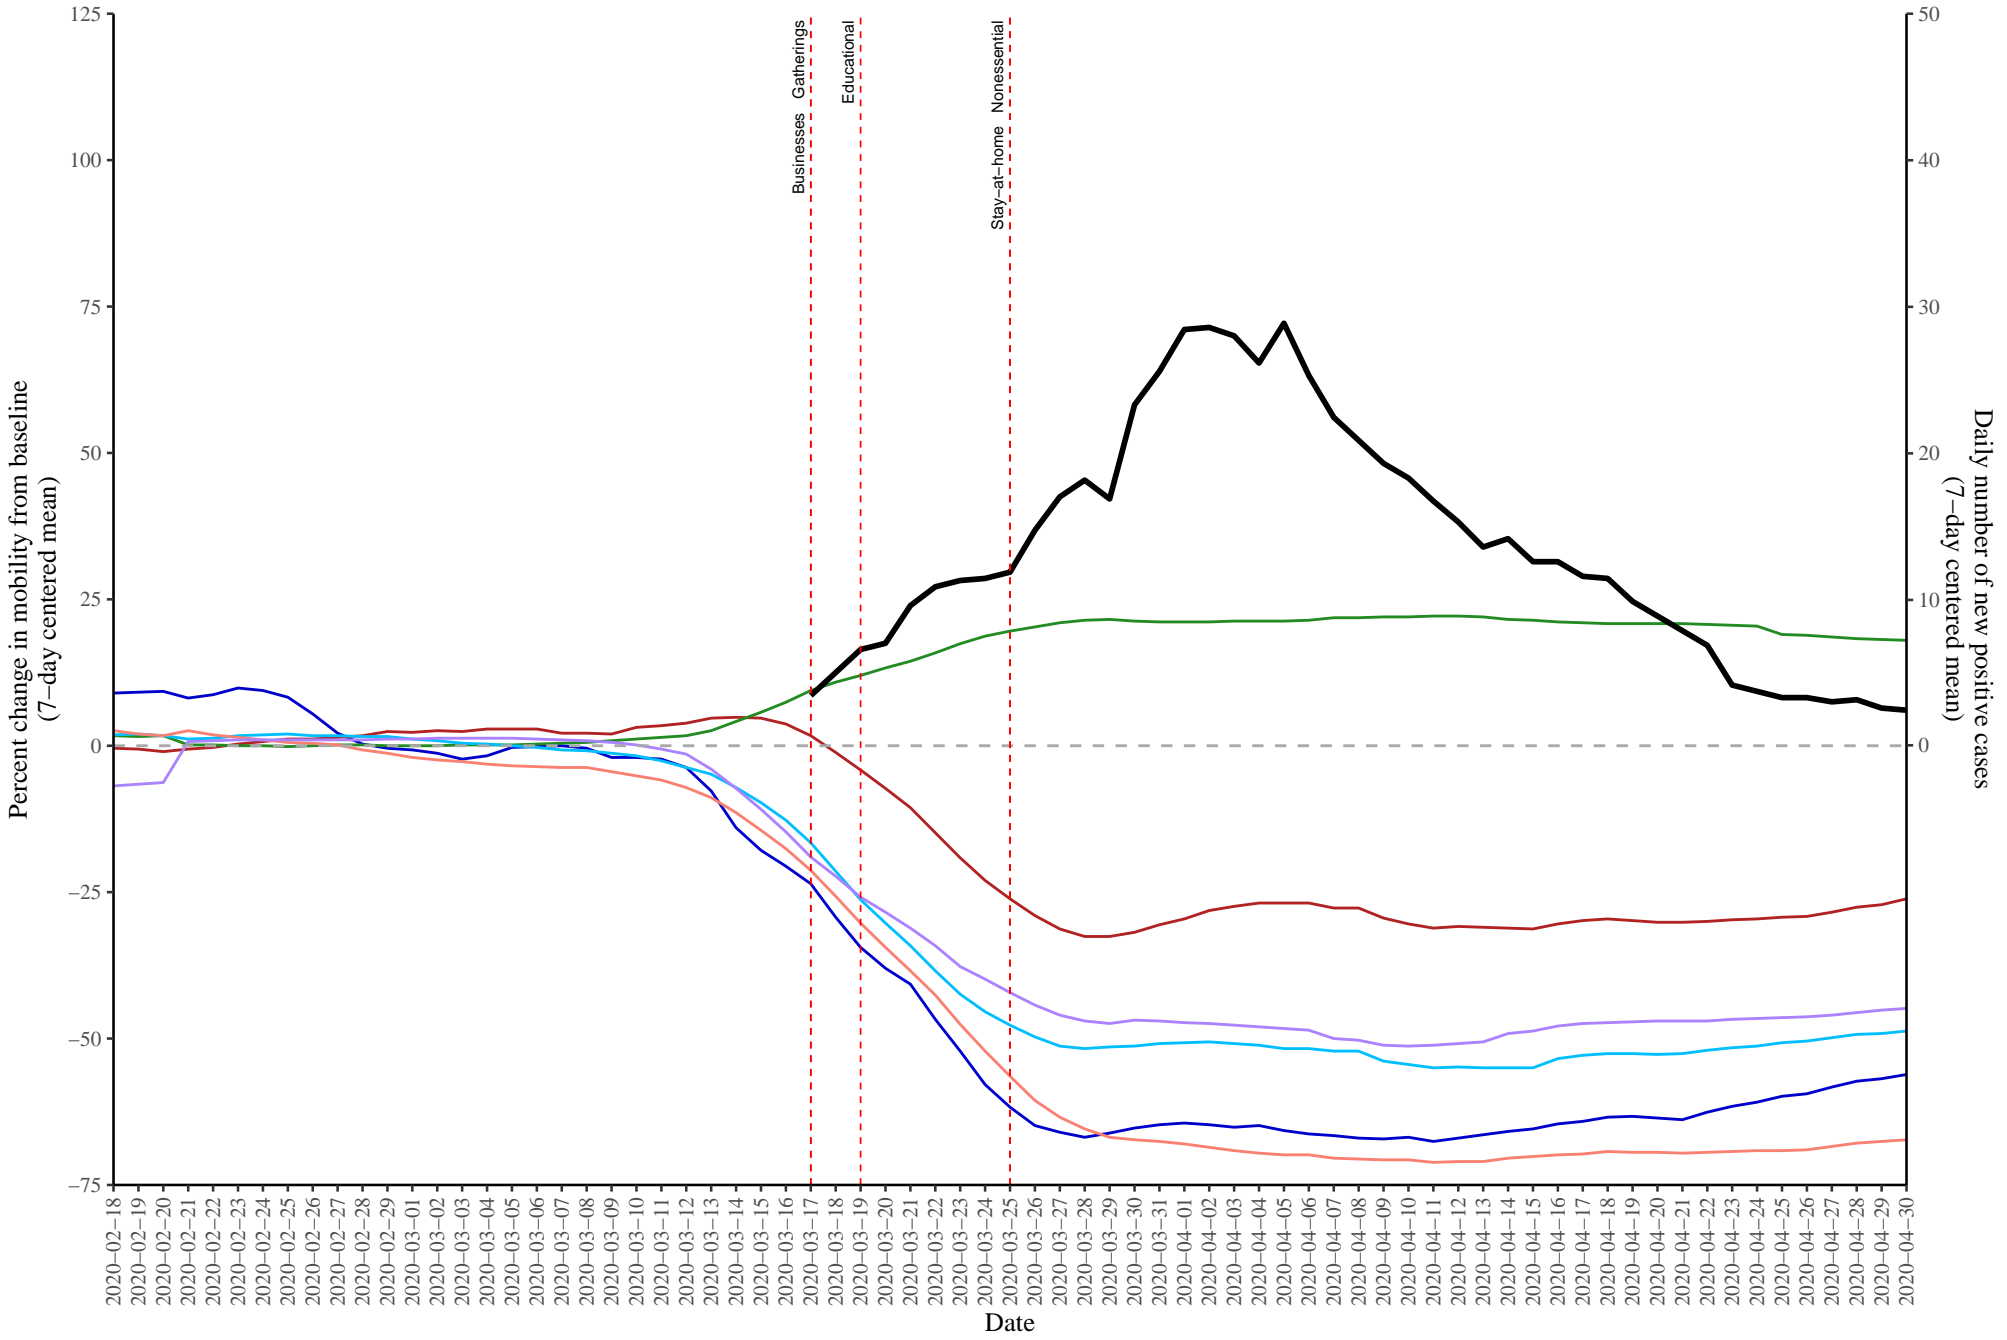

- Parks mobility
- Residential mobility
- Transit stations mobility
- SARS-CoV-2 Cases
- Grocery and pharmacy mobility
- Retail and recreation mobility
- Workplace mobility

# Idaho

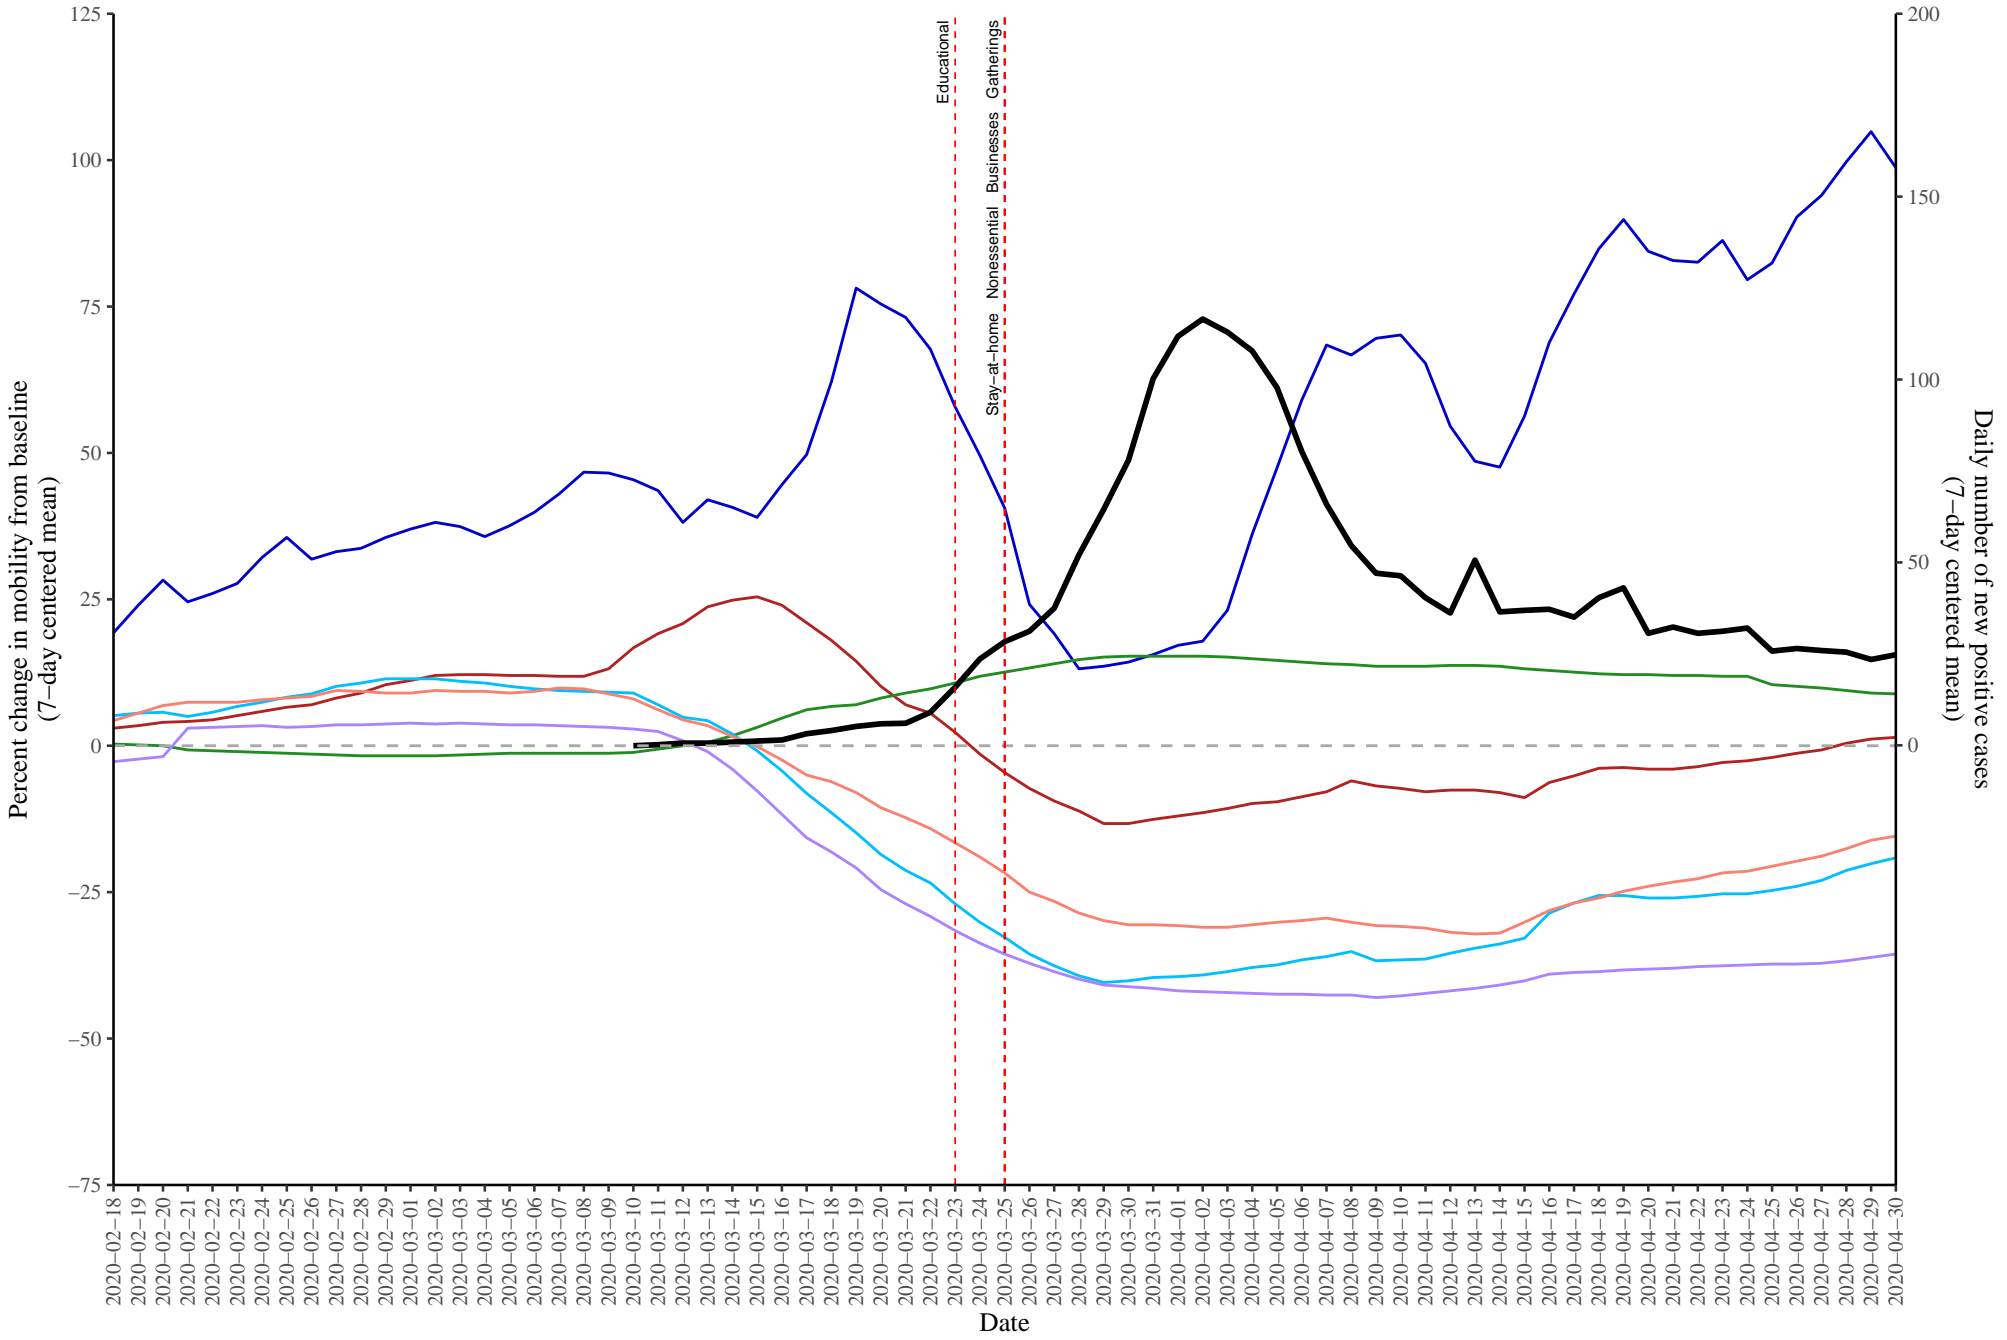

- Parks mobility
- Residential mobility
- Transit stations mobility
- SARS-CoV-2 Cases
- Grocery and pharmacy mobility
- Retail and recreation mobility
- Workplace mobility

# Illinois

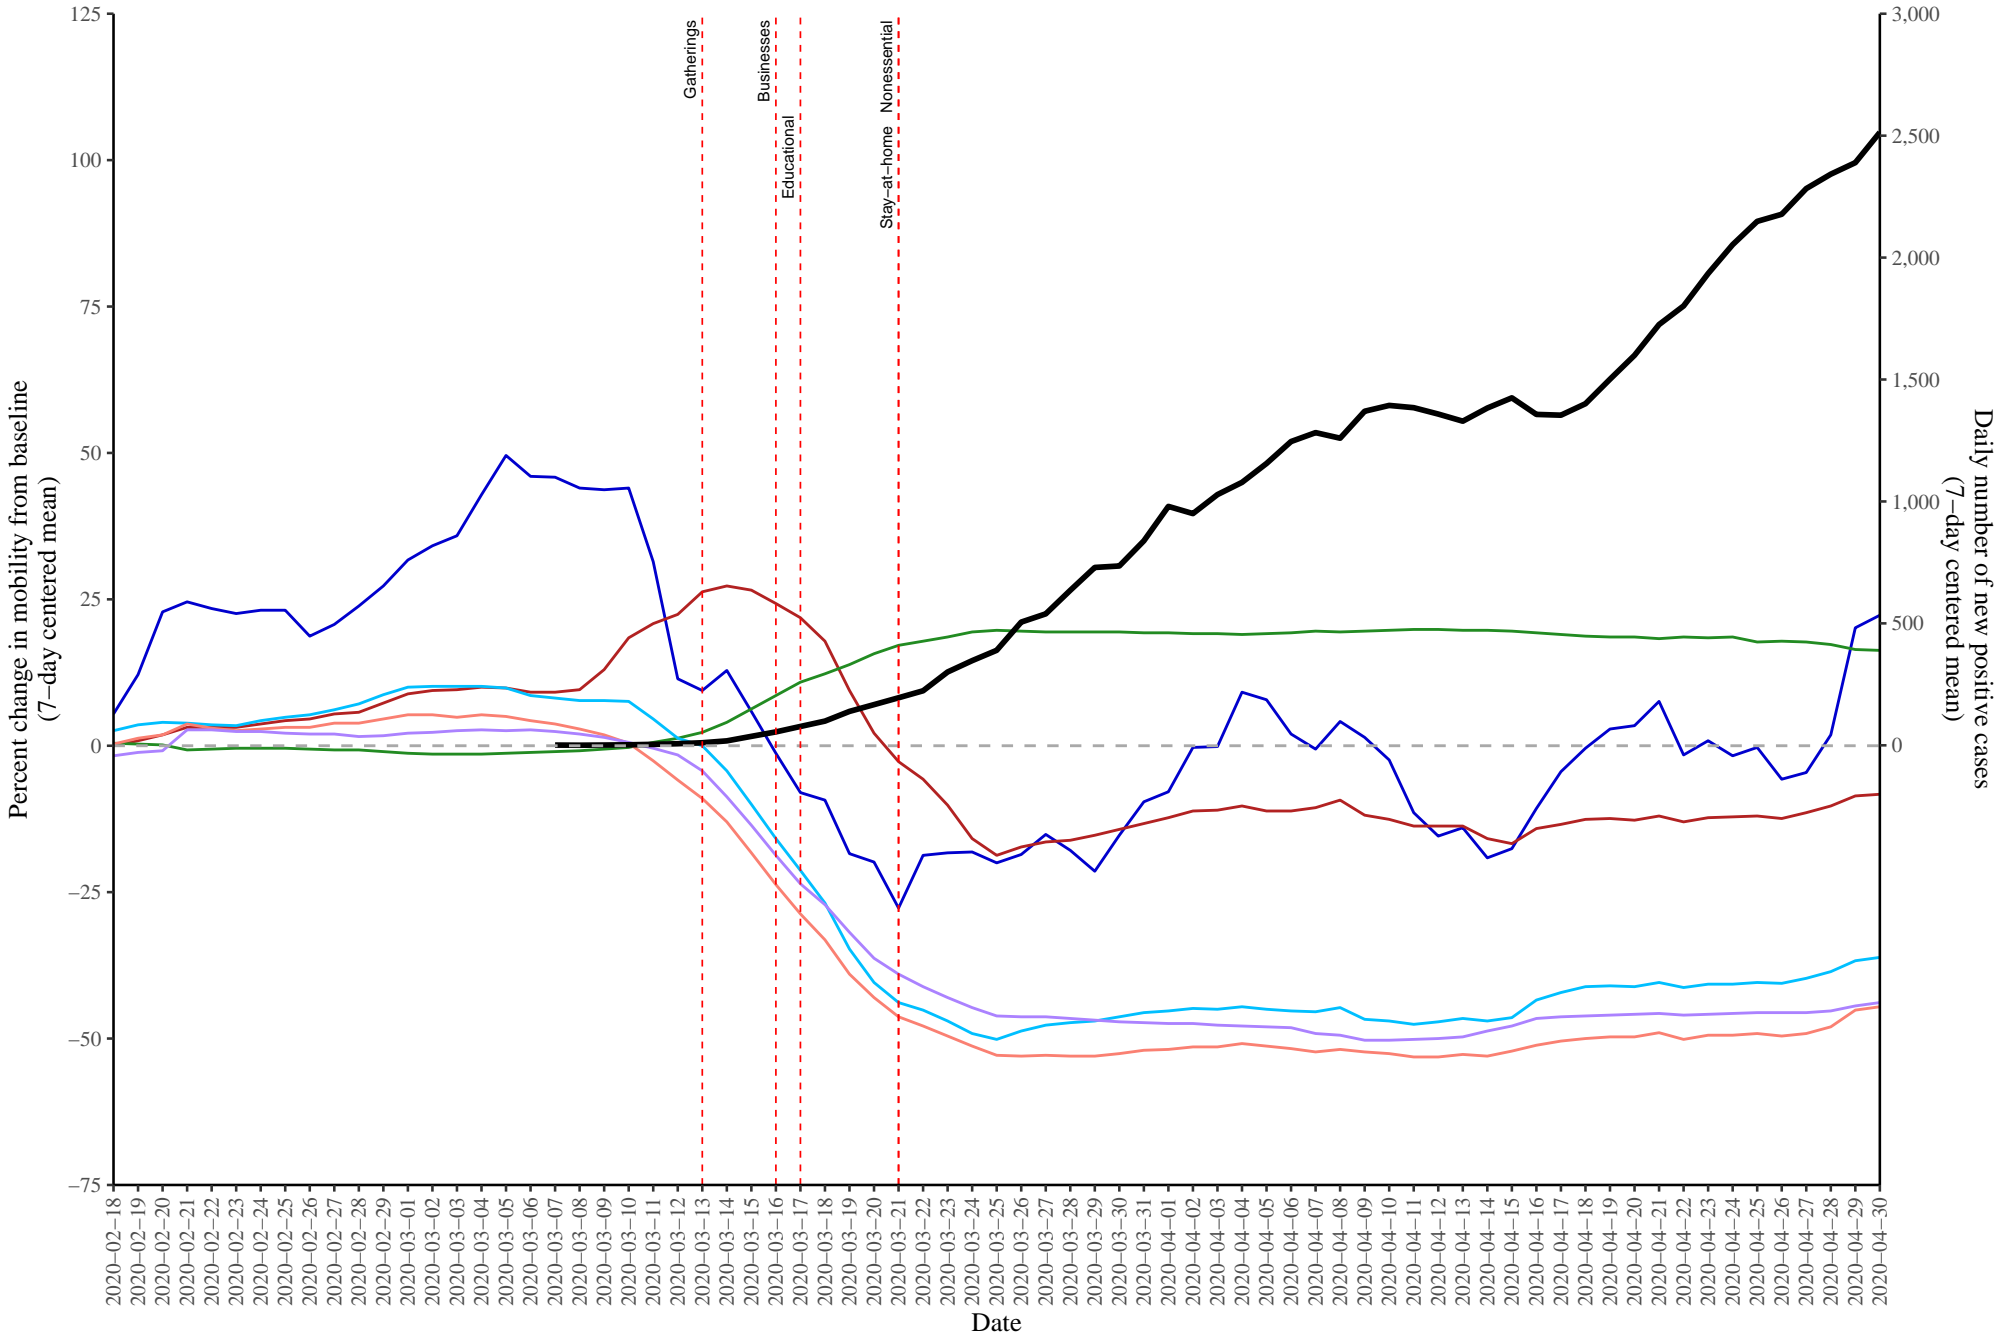

- Parks mobility
- Residential mobility
- Transit stations mobility
- SARS-CoV-2 Cases
- Grocery and pharmacy mobility
- Retail and recreation mobility
- Workplace mobility

# Indiana

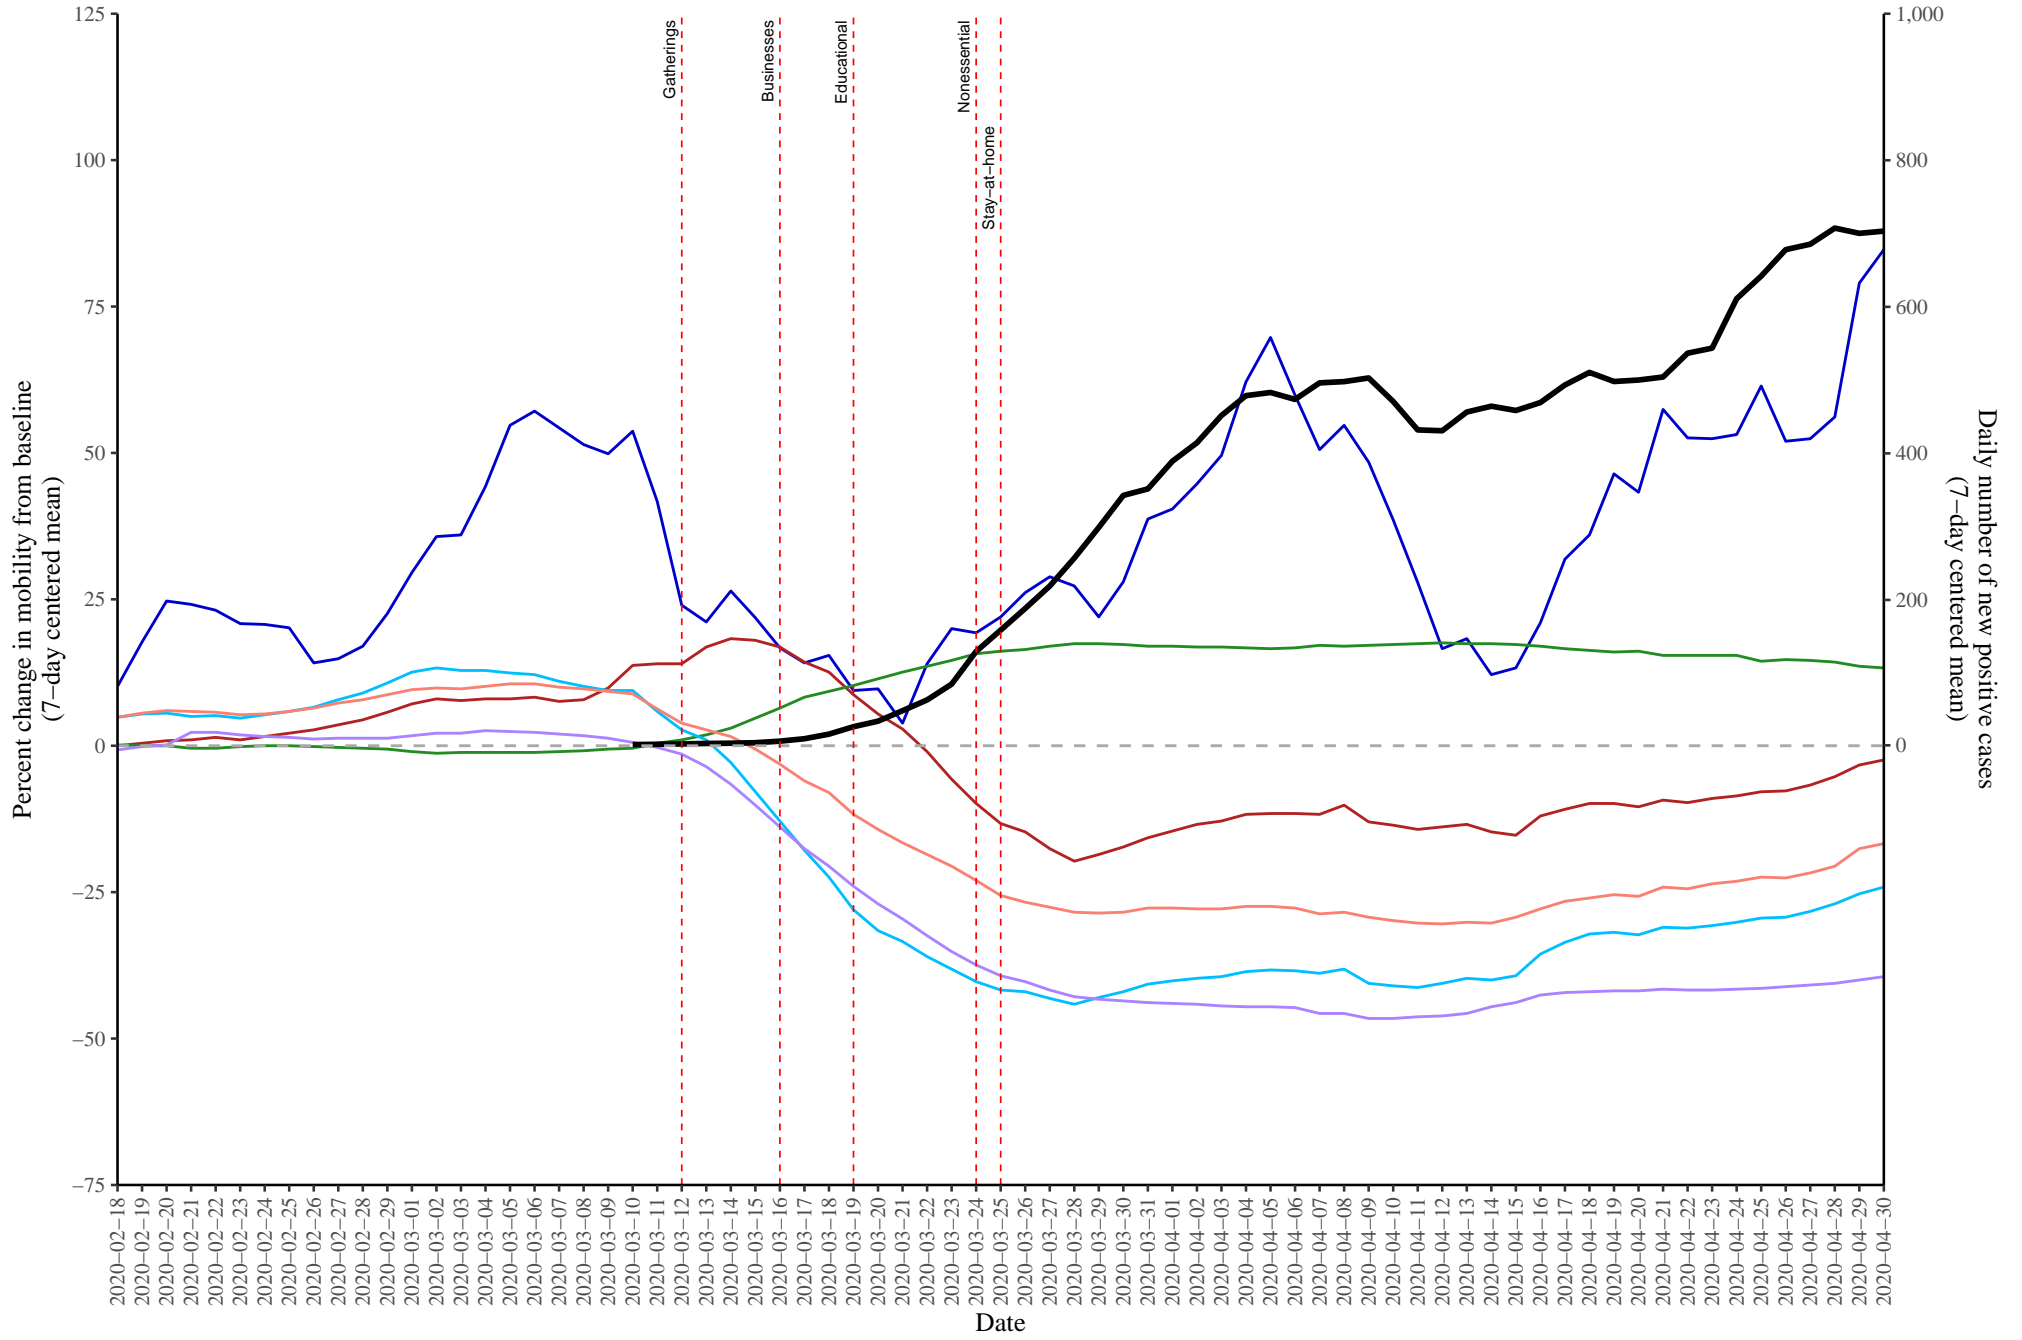

- Parks mobility
- Residential mobility
- Transit stations mobility
- SARS-CoV-2 Cases
- Grocery and pharmacy mobility
- Retail and recreation mobility
- Workplace mobility



# Iowa

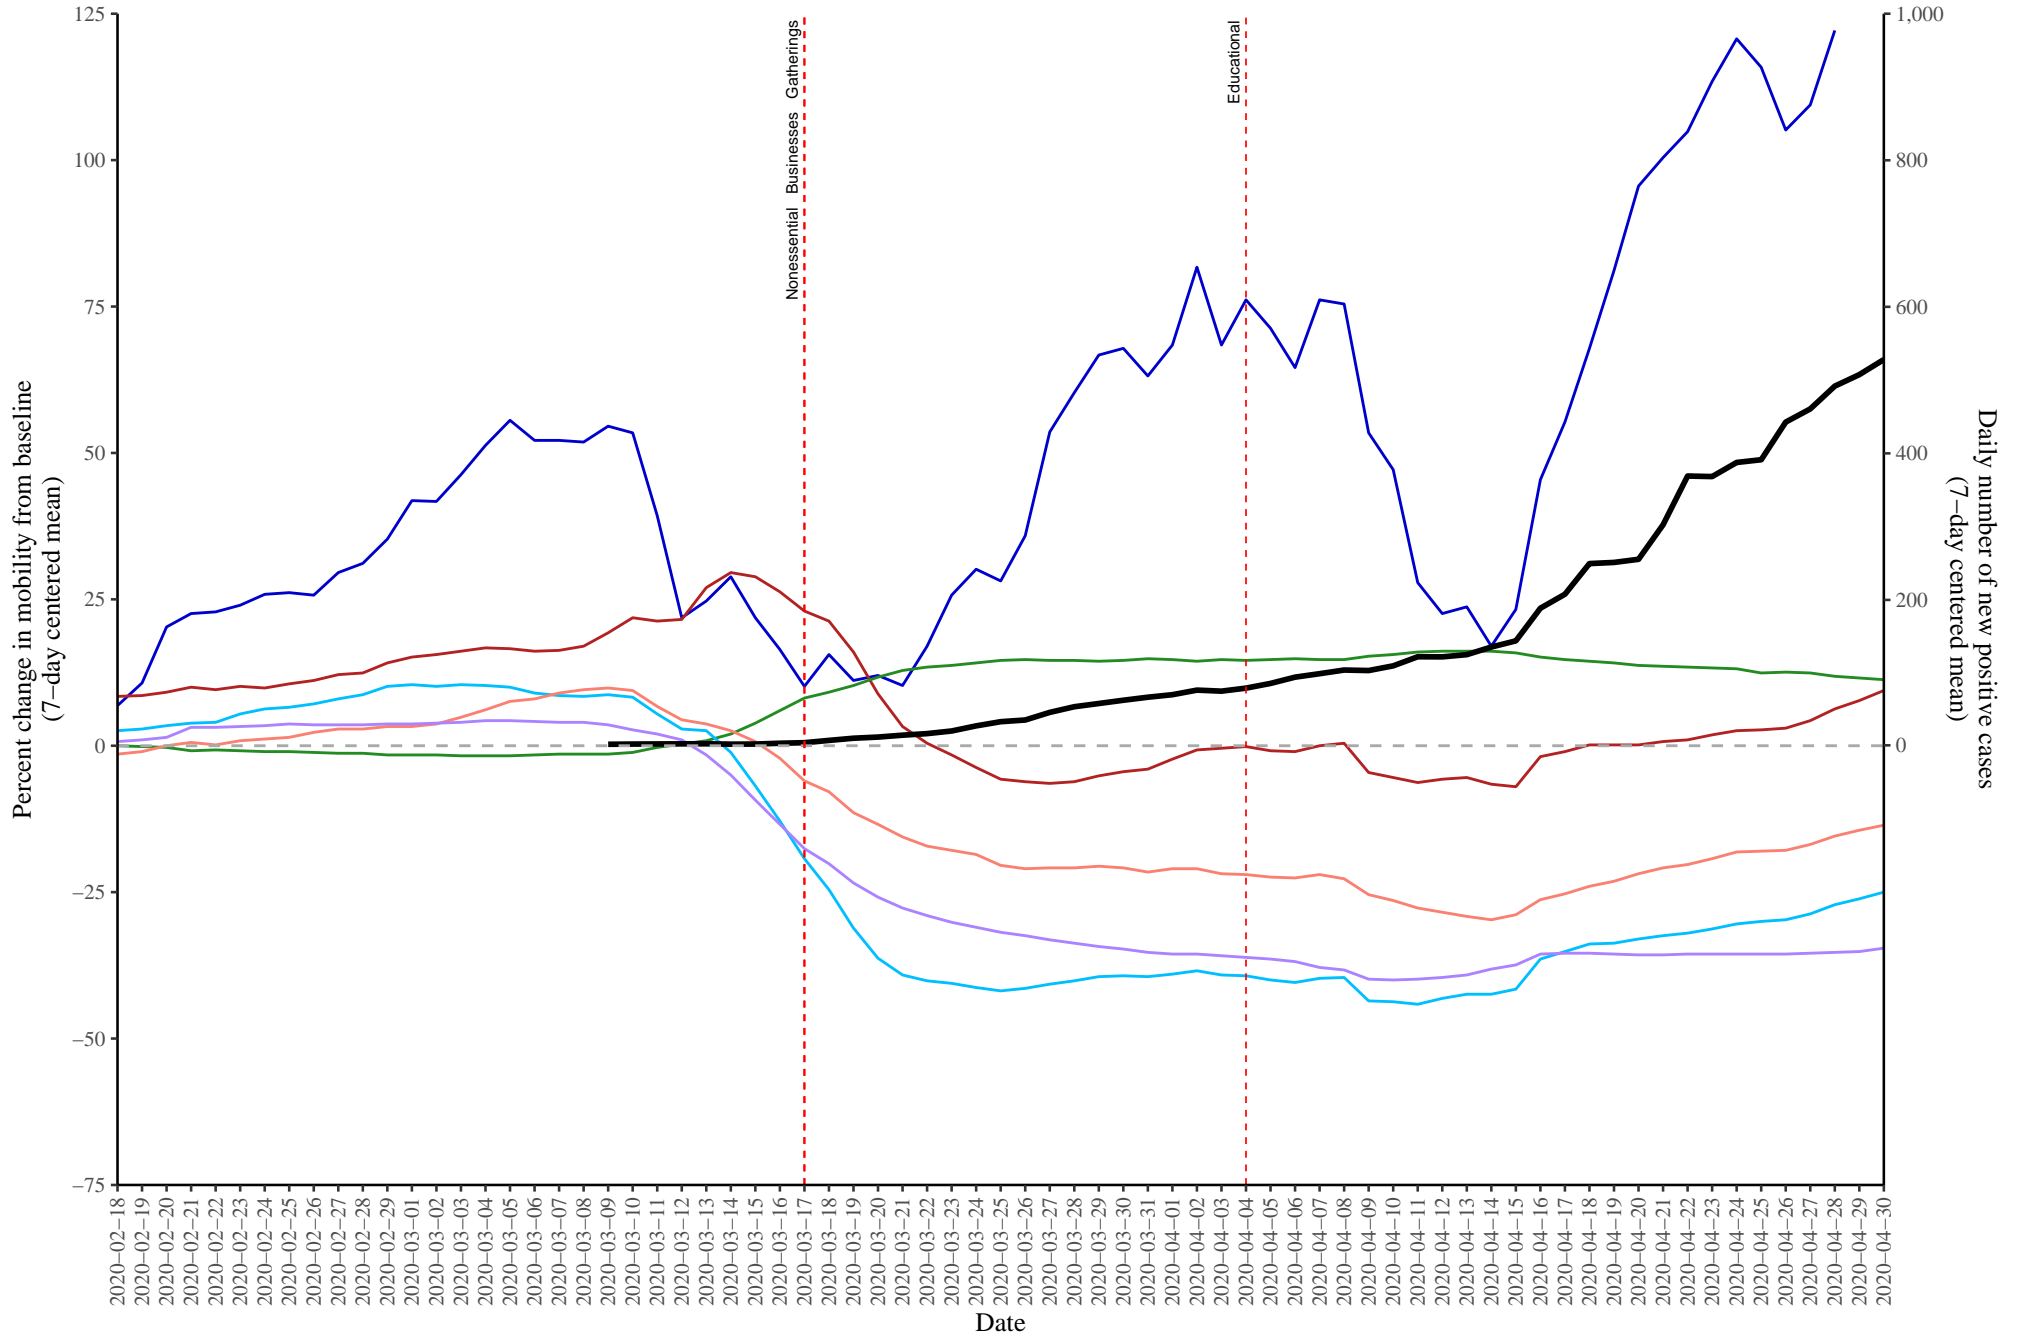

- Parks mobility
- Grocery and pharmacy mobility
- Residential mobility
- Retail and recreation mobility
- Transit stations mobility
- Workplace mobility
- SARS-CoV-2 Cases

# Kansas

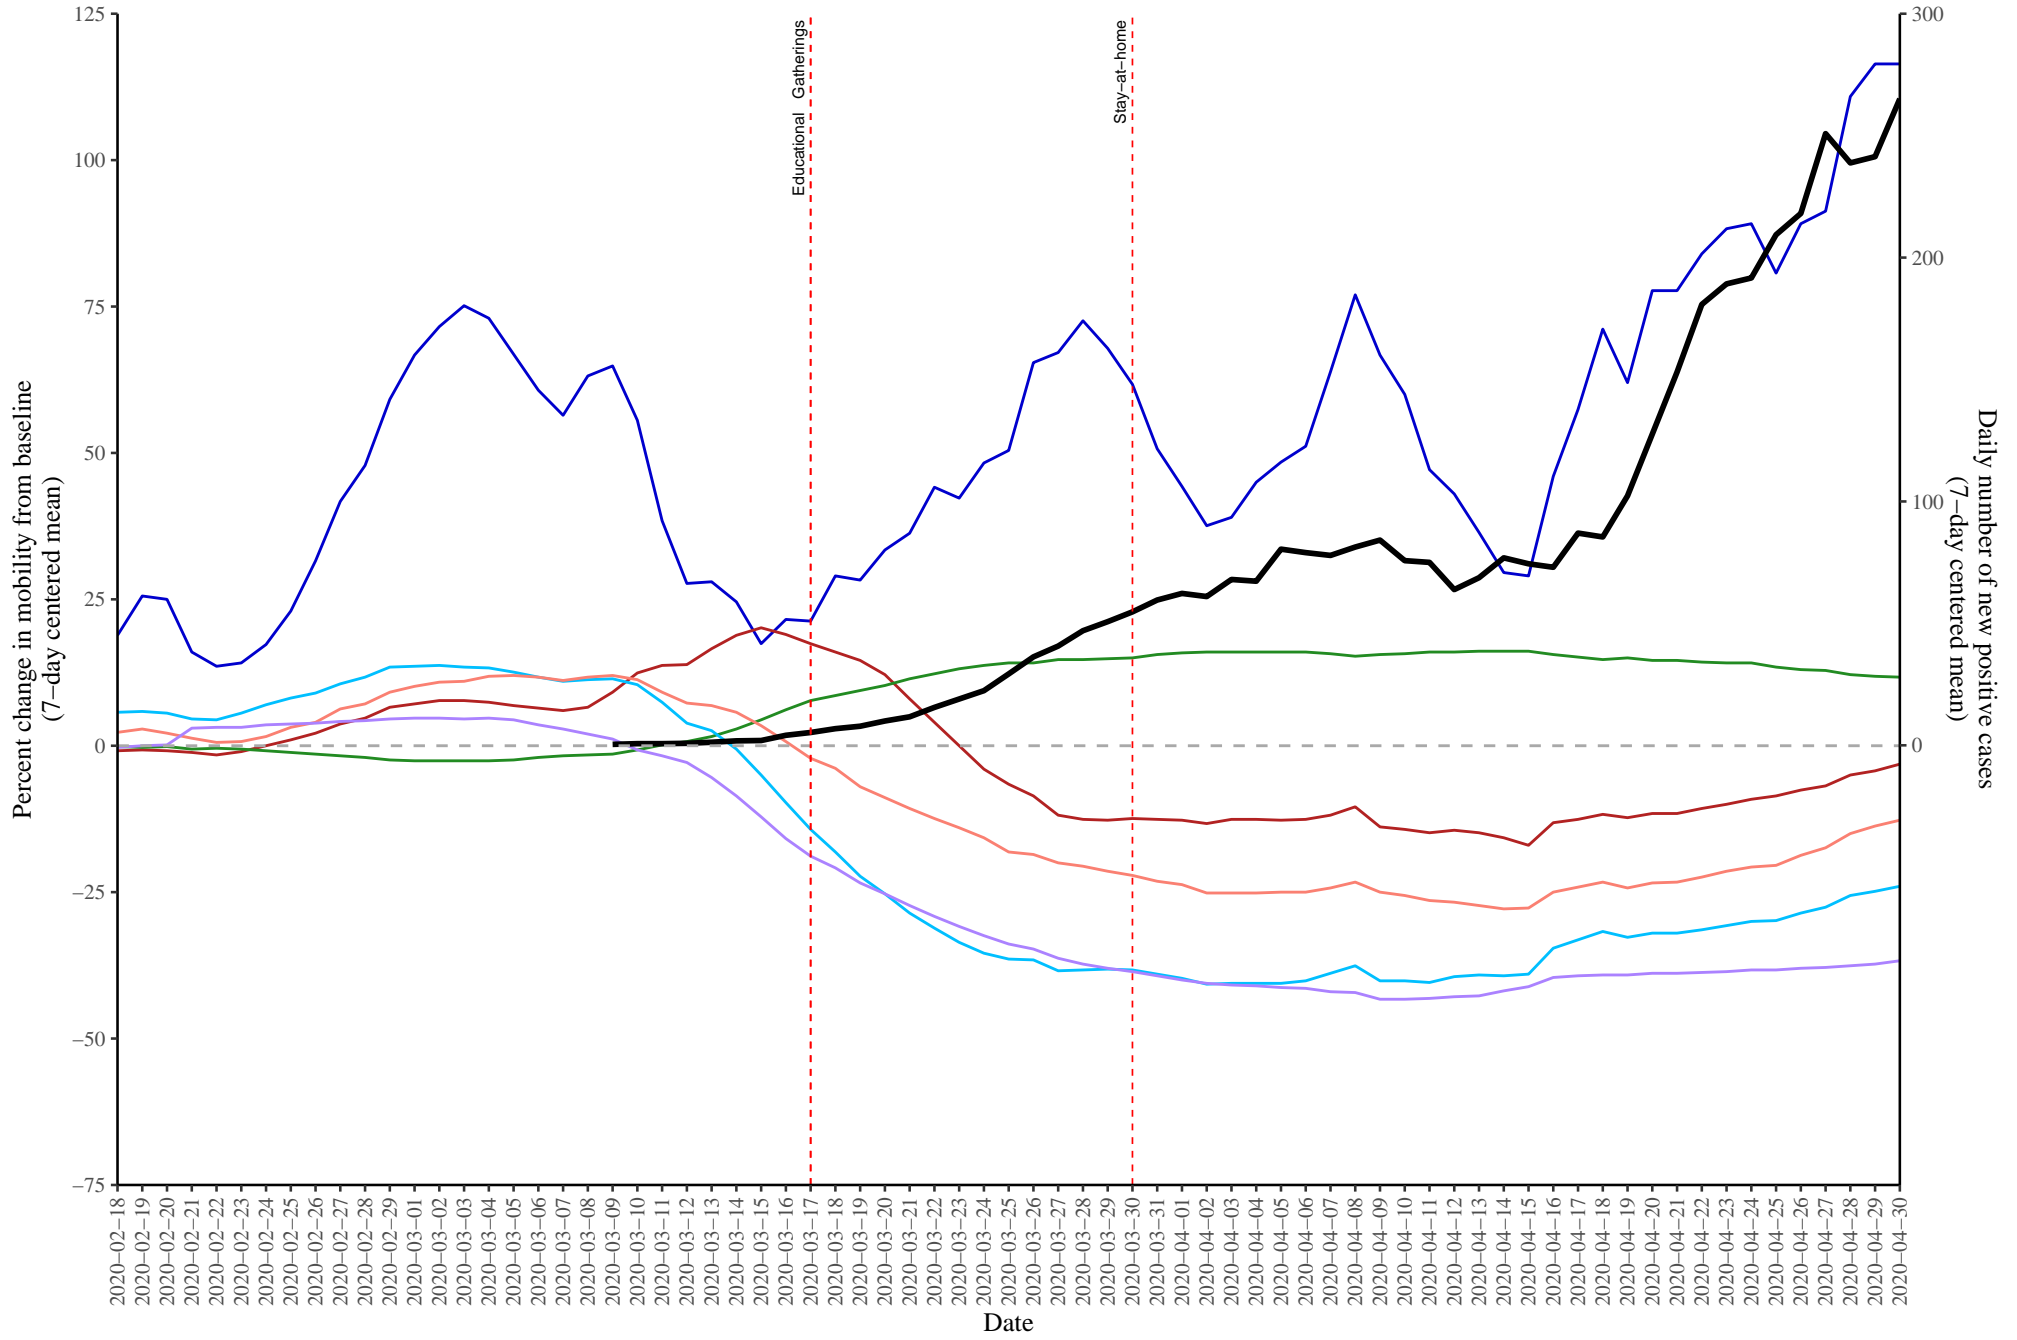

- Parks mobility
- Residential mobility
- Transit stations mobility
- SARS-CoV-2 Cases
- Grocery and pharmacy mobility
- Retail and recreation mobility
- Workplace mobility

# Kentucky

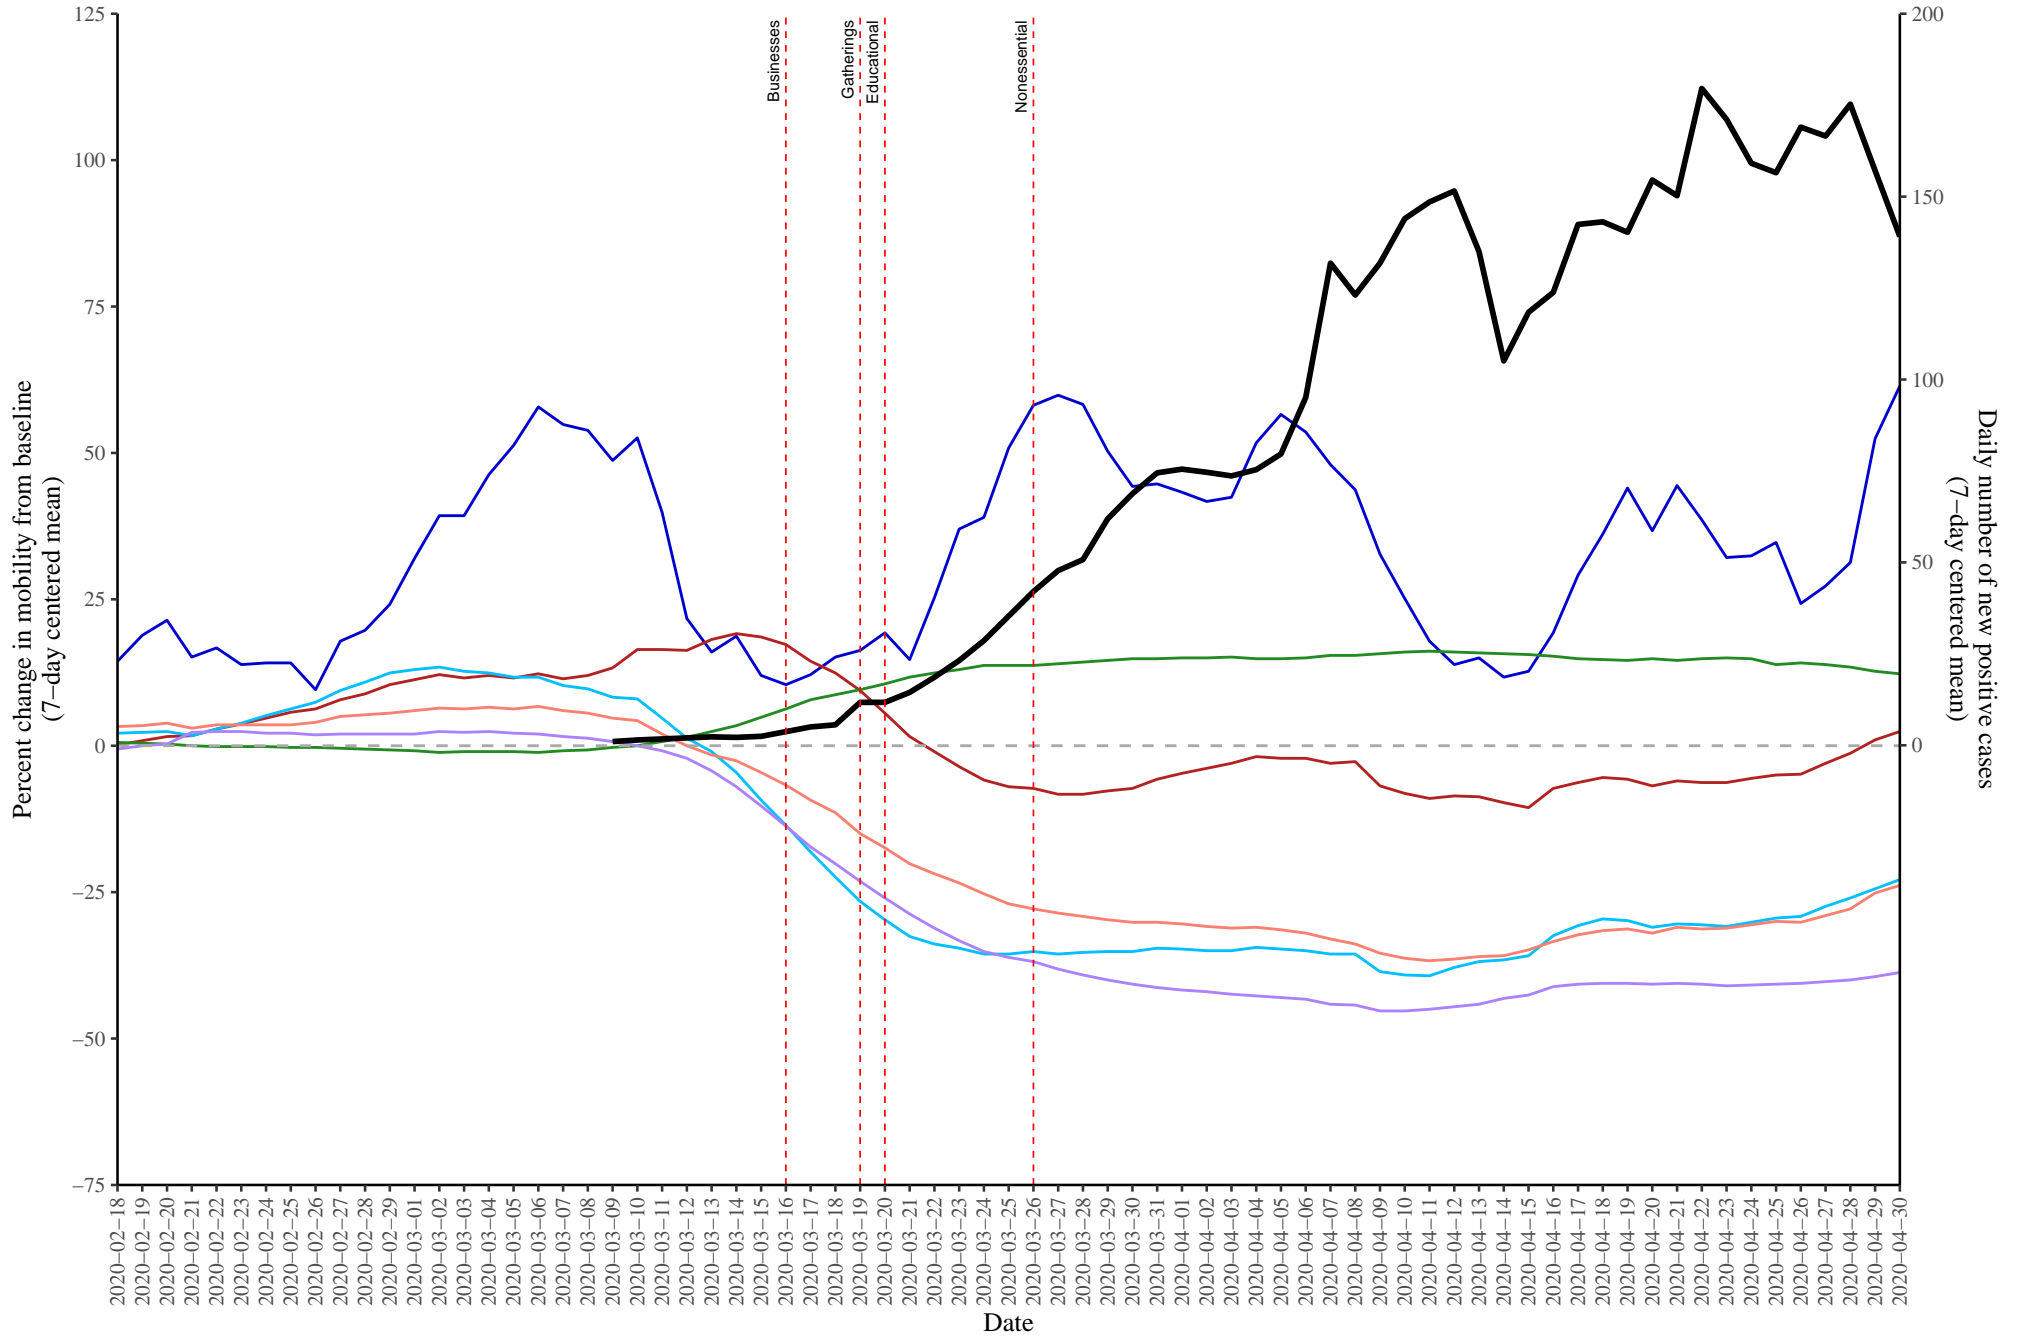

- Parks mobility
- Residential mobility
- Transit stations mobility
- SARS-CoV-2 Cases
- Grocery and pharmacy mobility
- Retail and recreation mobility
- Workplace mobility

# Louisiana

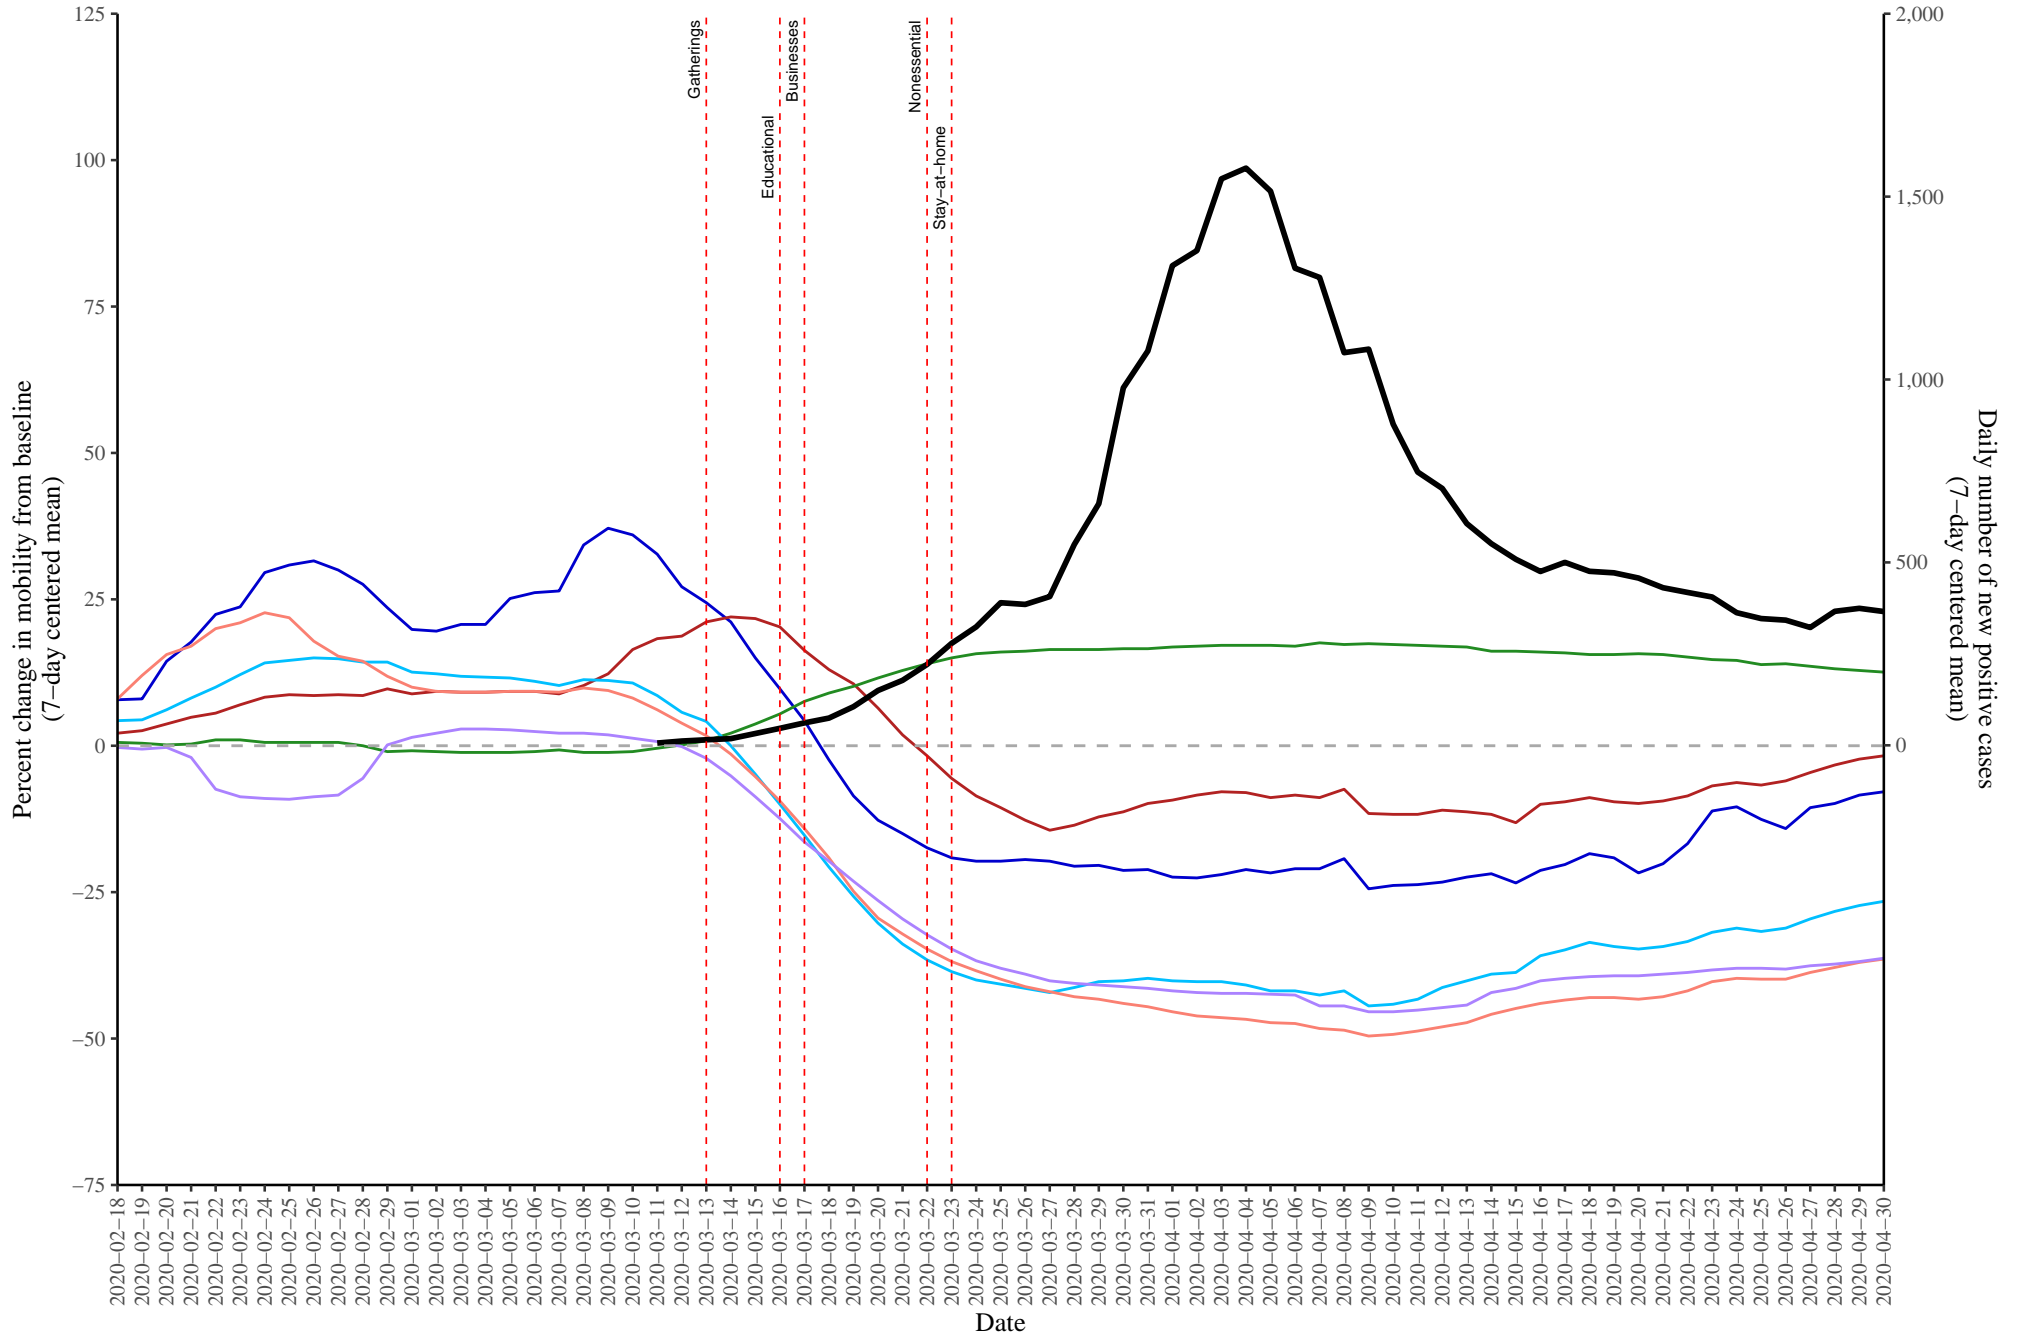

- Parks mobility
- Residential mobility
- Transit stations mobility
- SARS-CoV-2 Cases
- Grocery and pharmacy mobility
- Retail and recreation mobility
- Workplace mobility

# Maine

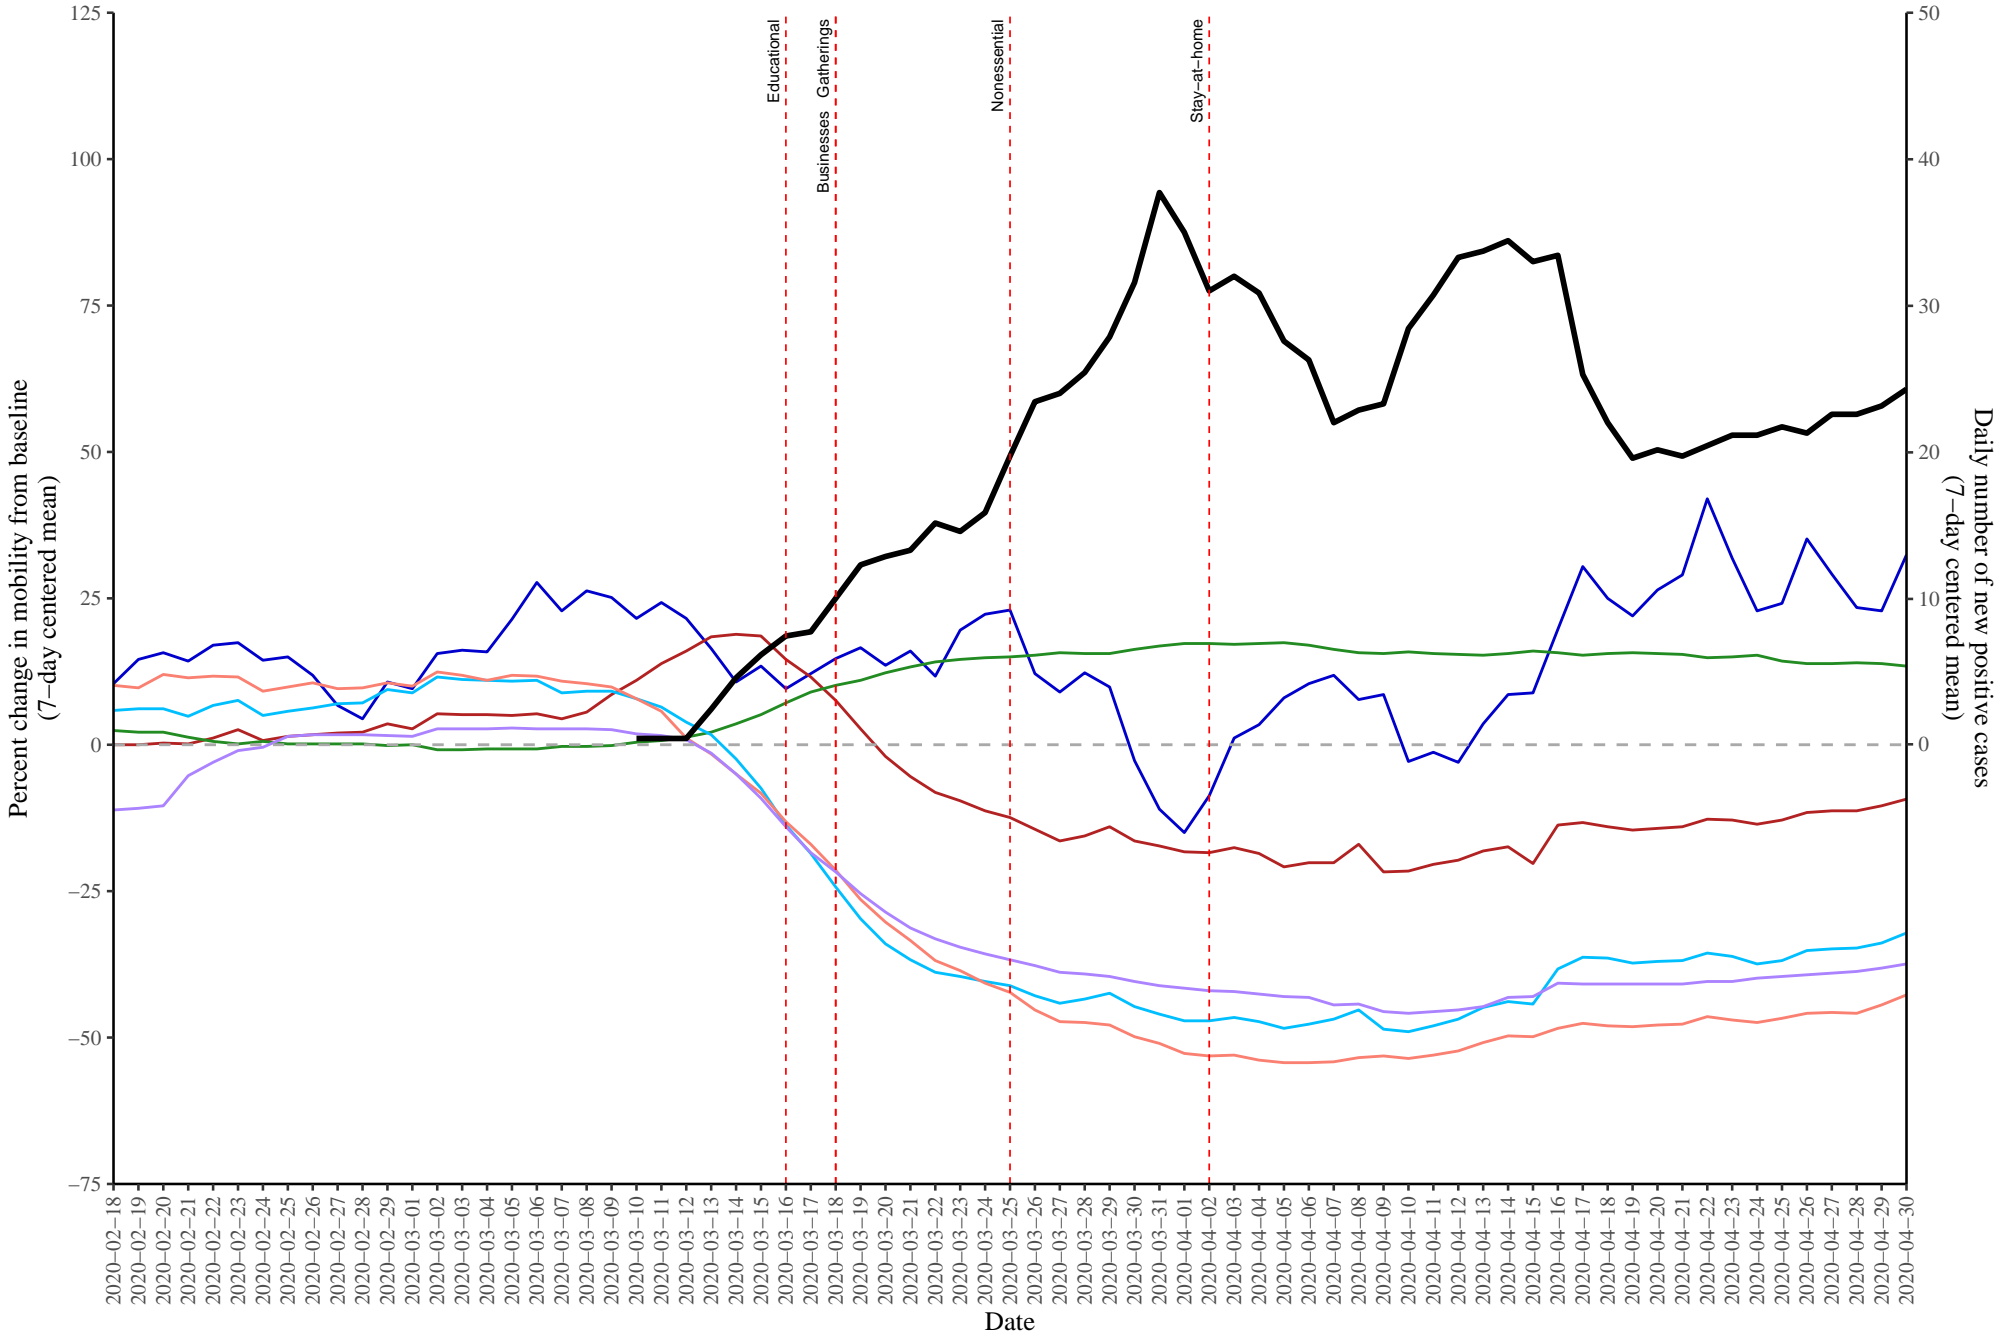

- Parks mobility
- Residential mobility
- Transit stations mobility
- SARS-CoV-2 Cases
- Grocery and pharmacy mobility
- Retail and recreation mobility
- Workplace mobility

# Maryland

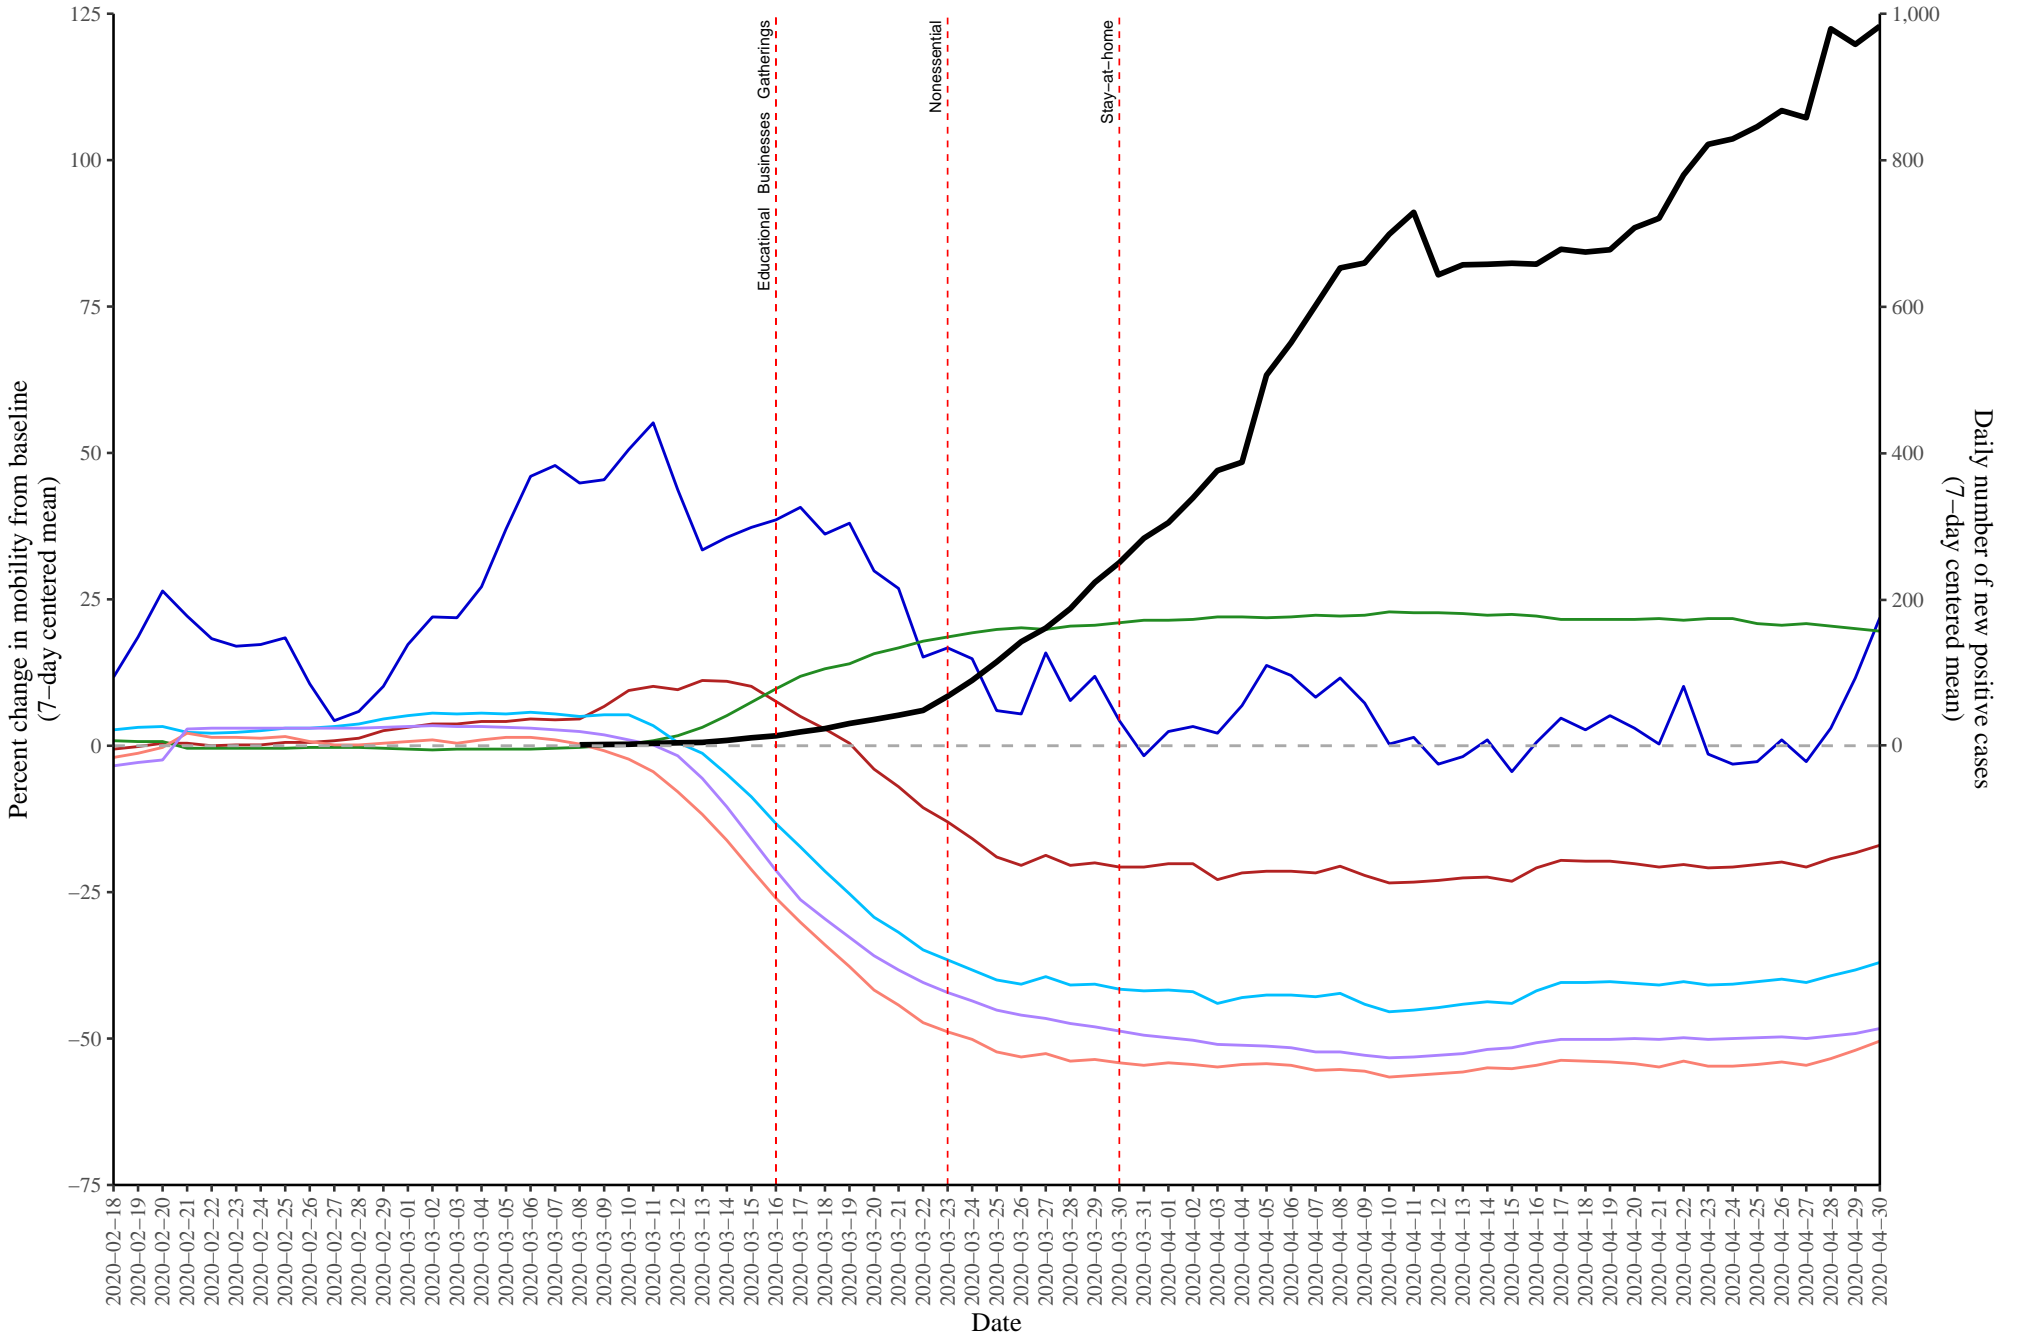

- Parks mobility
- Residential mobility
- Transit stations mobility
- SARS-CoV-2 Cases
- Grocery and pharmacy mobility
- Retail and recreation mobility
- Workplace mobility

# Massachusetts

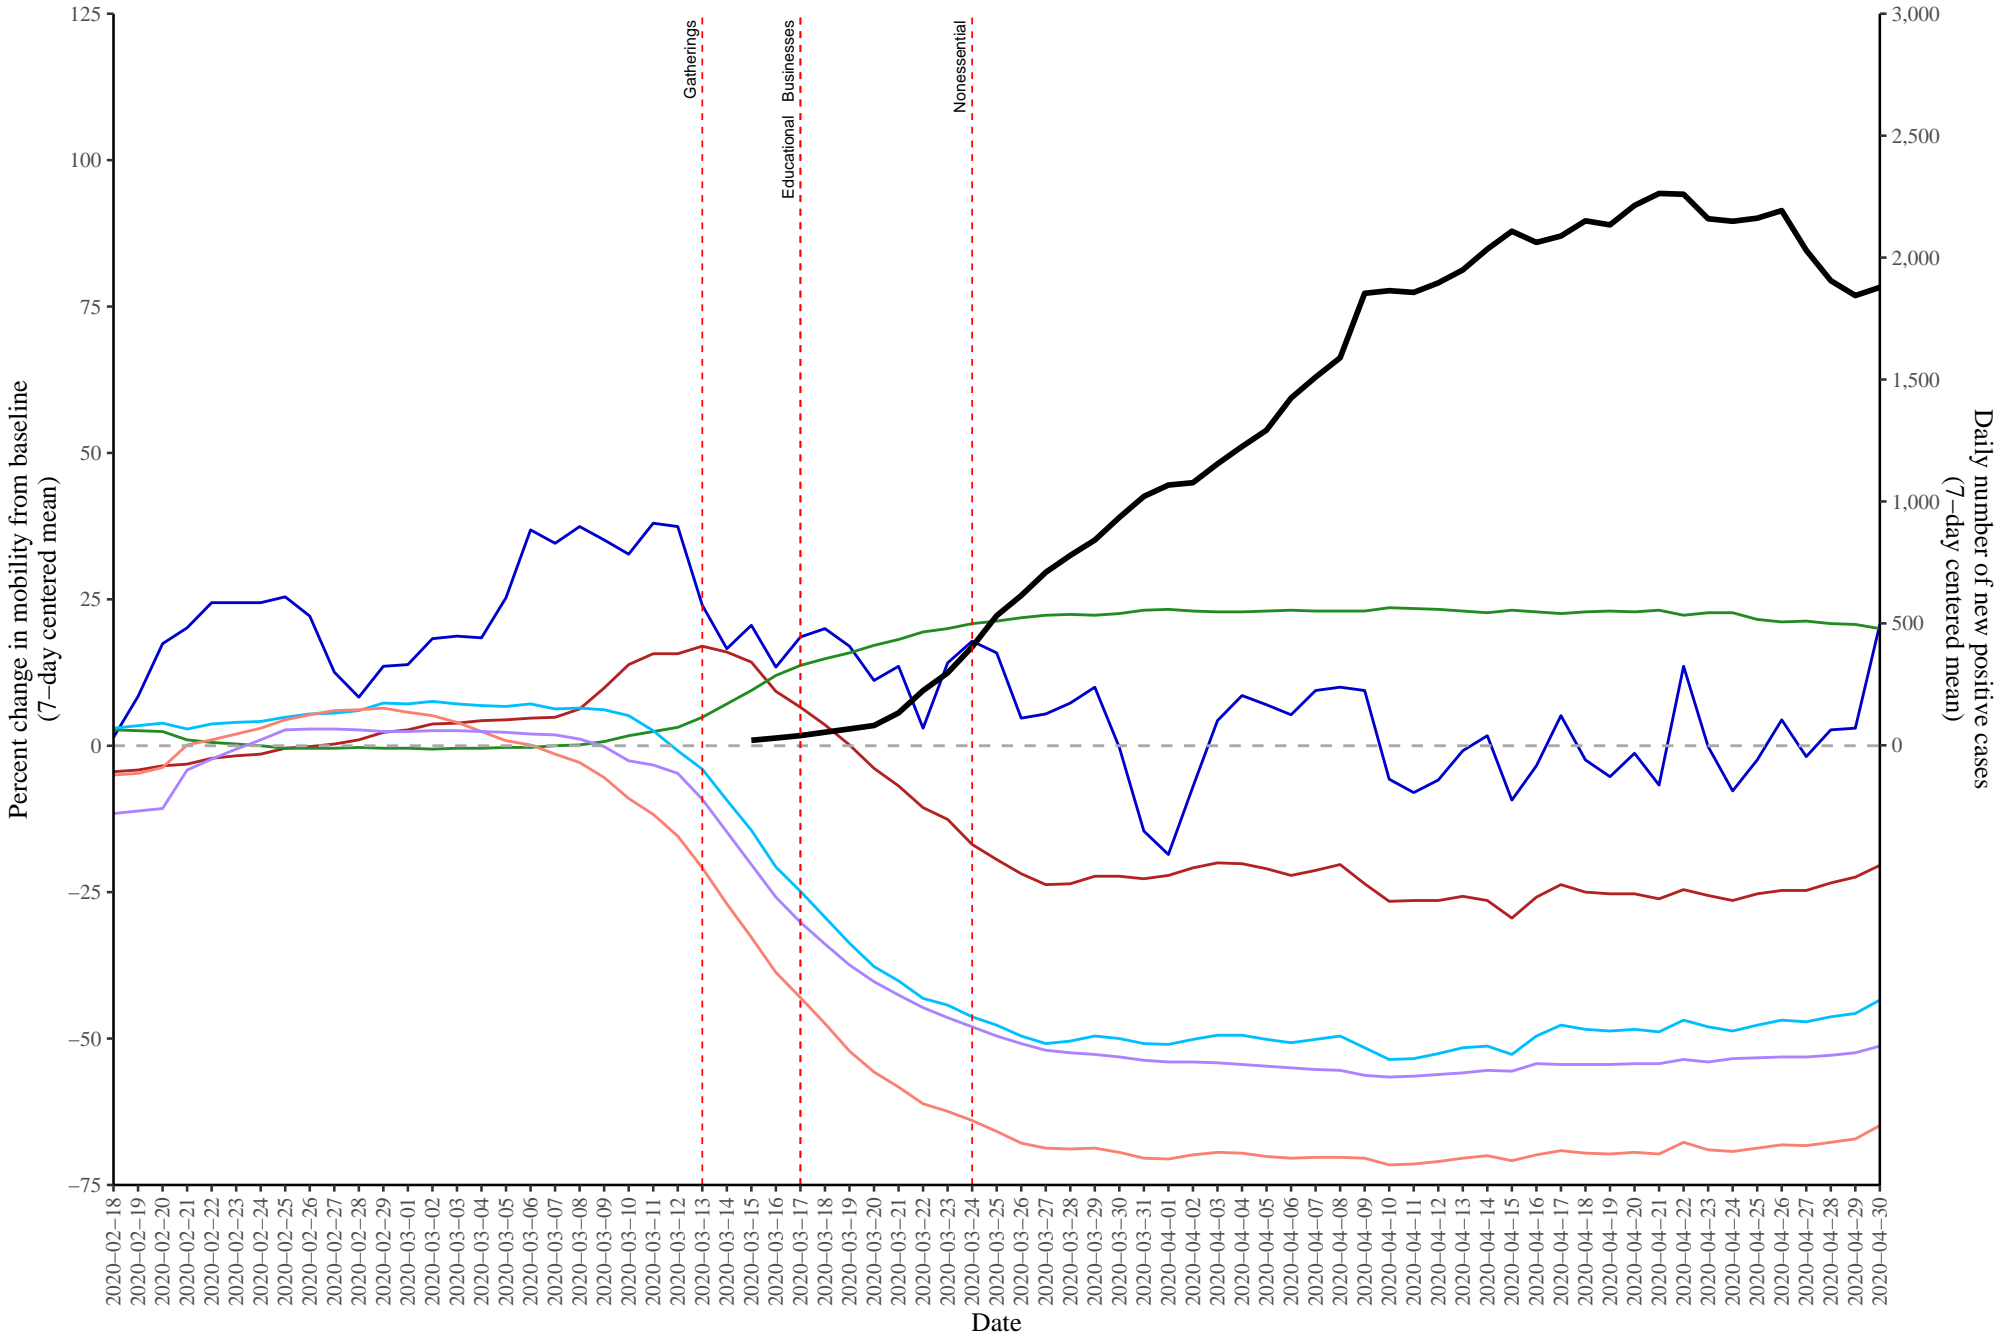

- Parks mobility
- Residential mobility
- Transit stations mobility
- SARS-CoV-2 Cases
- Grocery and pharmacy mobility
- Retail and recreation mobility
- Workplace mobility

# Michigan

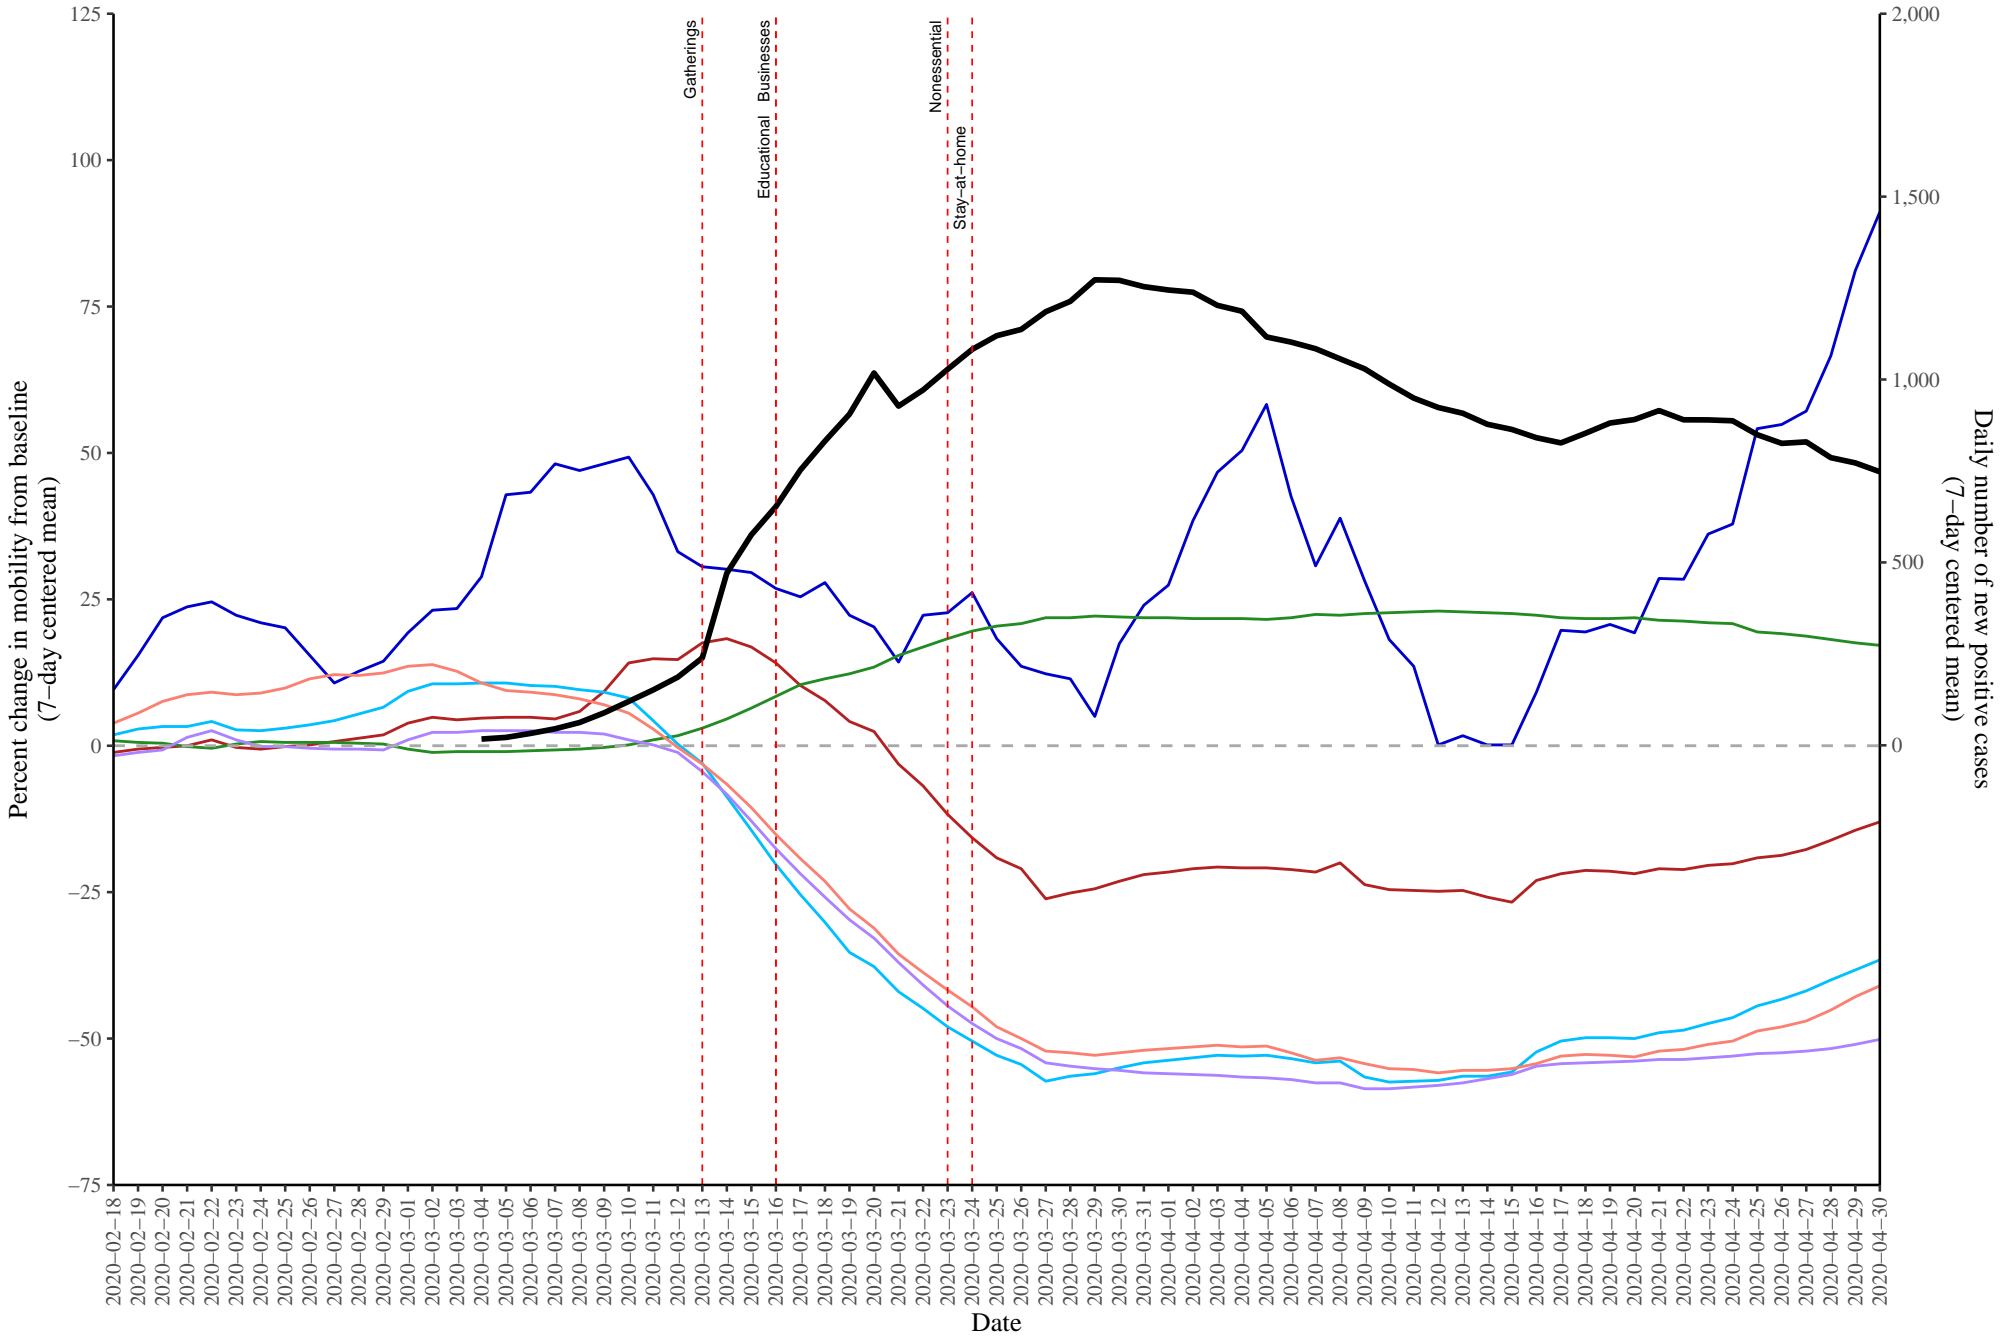

- Parks mobility
- Residential mobility
- Transit stations mobility
- SARS-CoV-2 Cases
- Grocery and pharmacy mobility
- Retail and recreation mobility
- Workplace mobility



# Minnesota

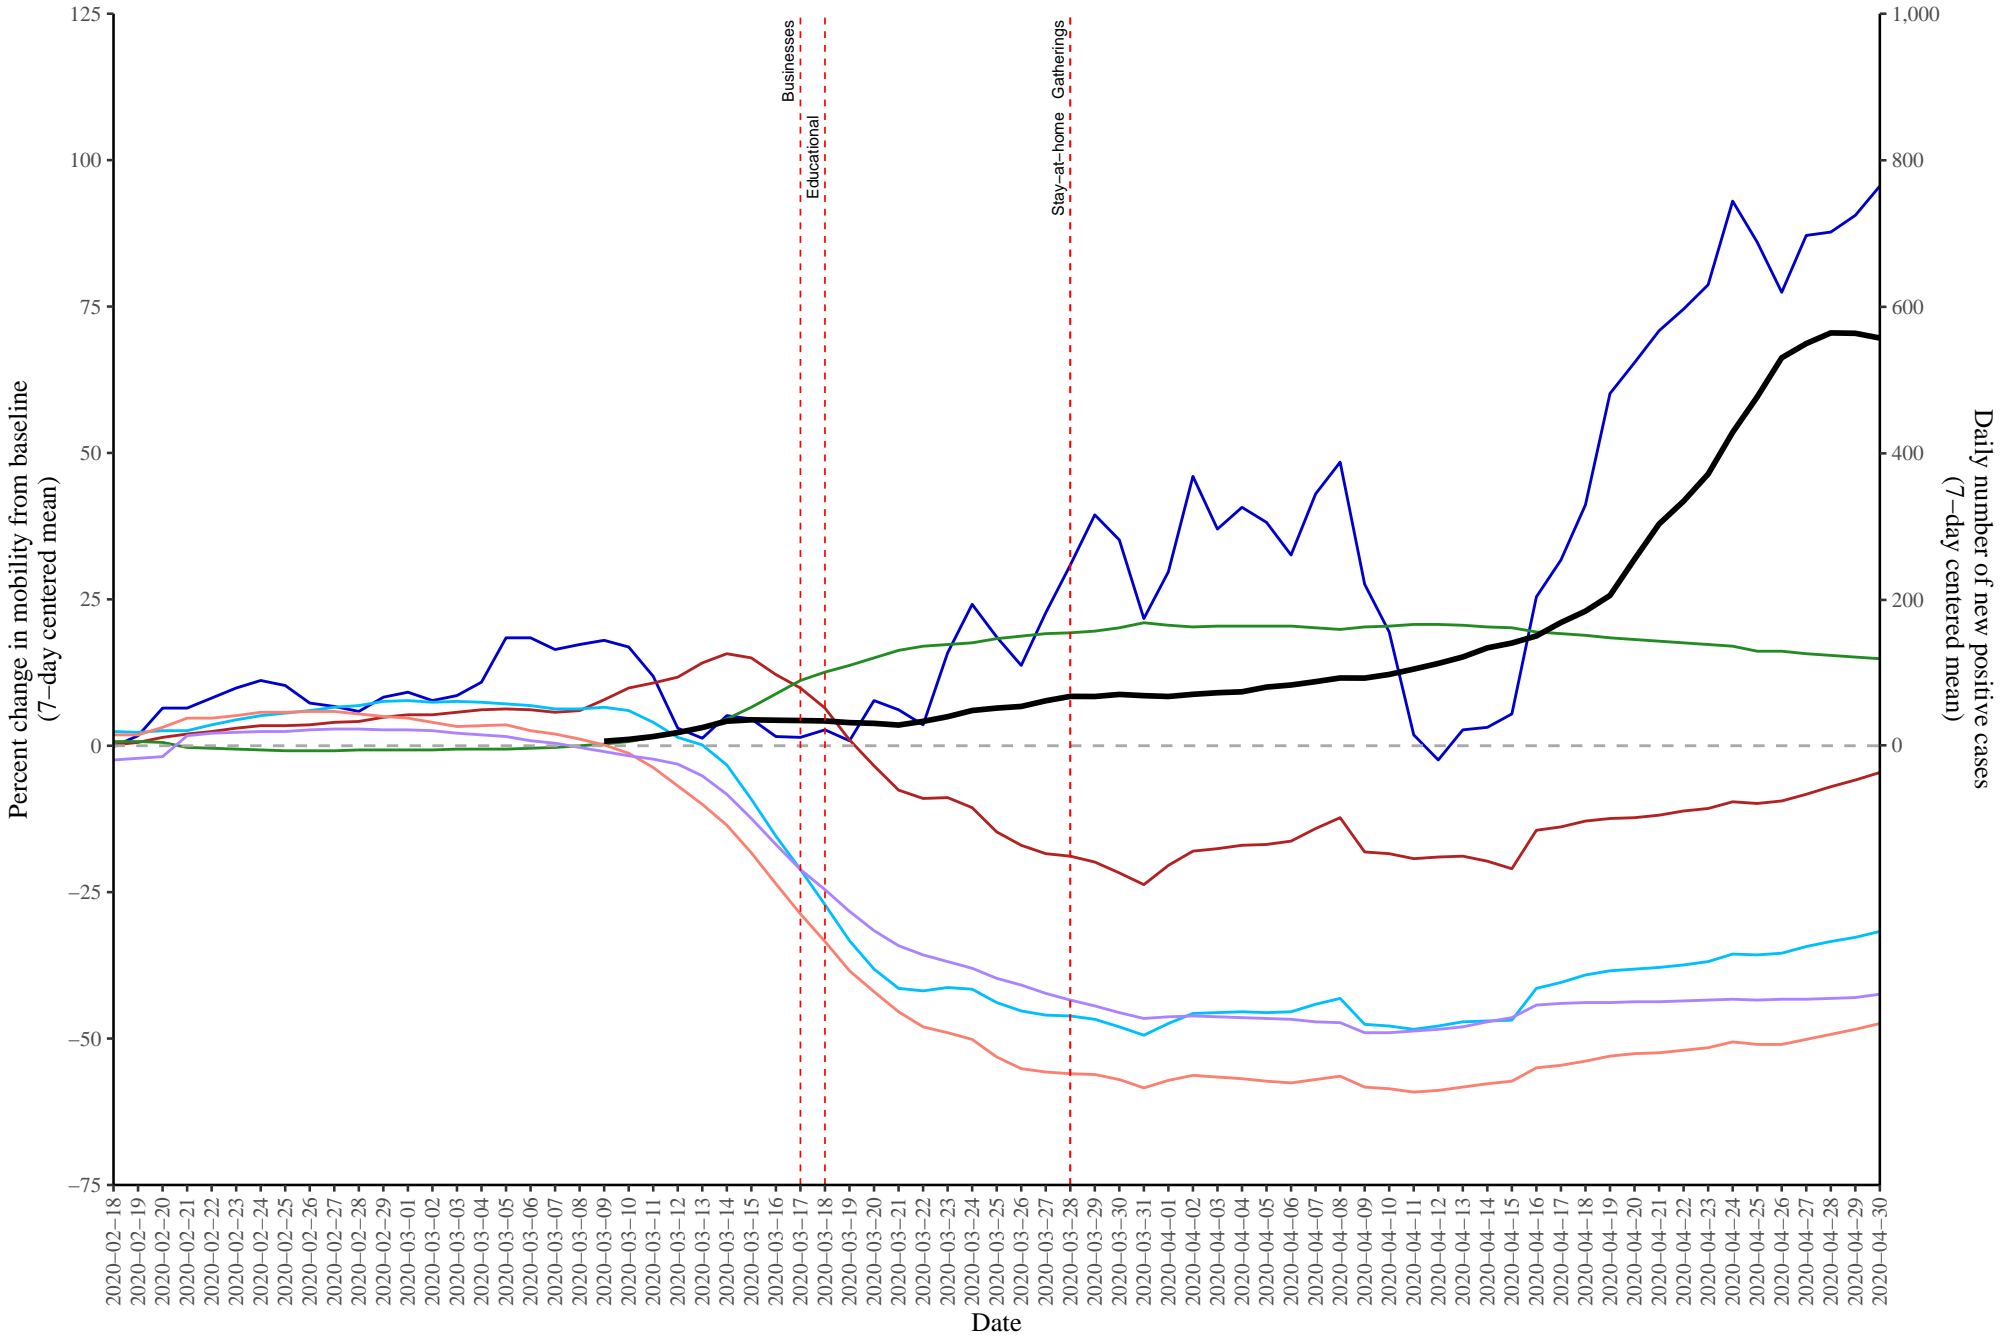

- Parks mobility
- Residential mobility
- Transit stations mobility
- SARS-CoV-2 Cases
- Grocery and pharmacy mobility
- Retail and recreation mobility
- Workplace mobility

# Mississippi

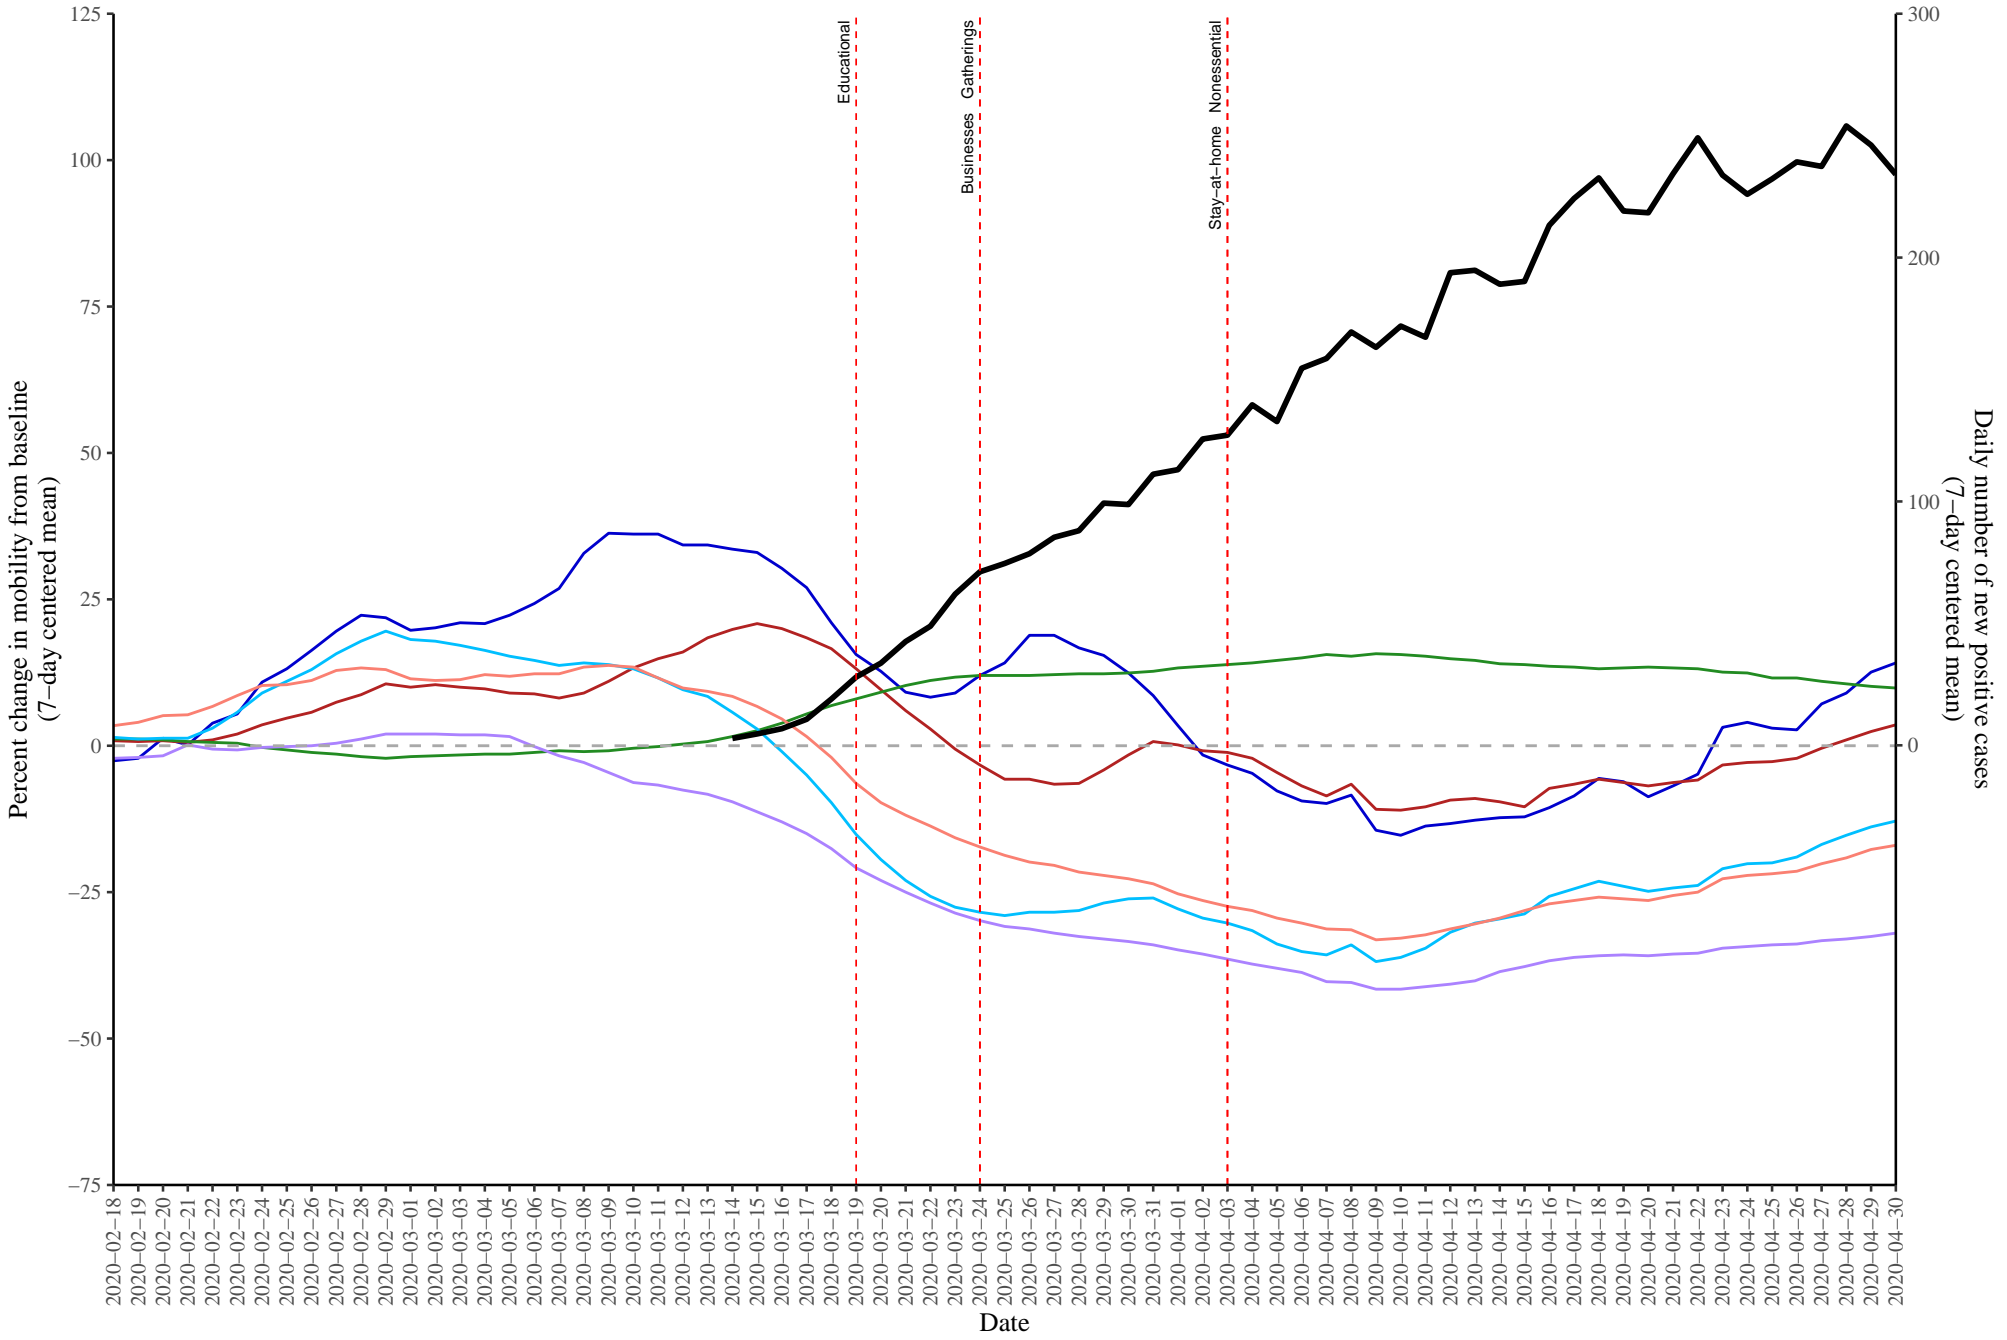

- Parks mobility
- Residential mobility
- Transit stations mobility
- SARS-CoV-2 Cases
- Grocery and pharmacy mobility
- Retail and recreation mobility
- Workplace mobility

# Missouri

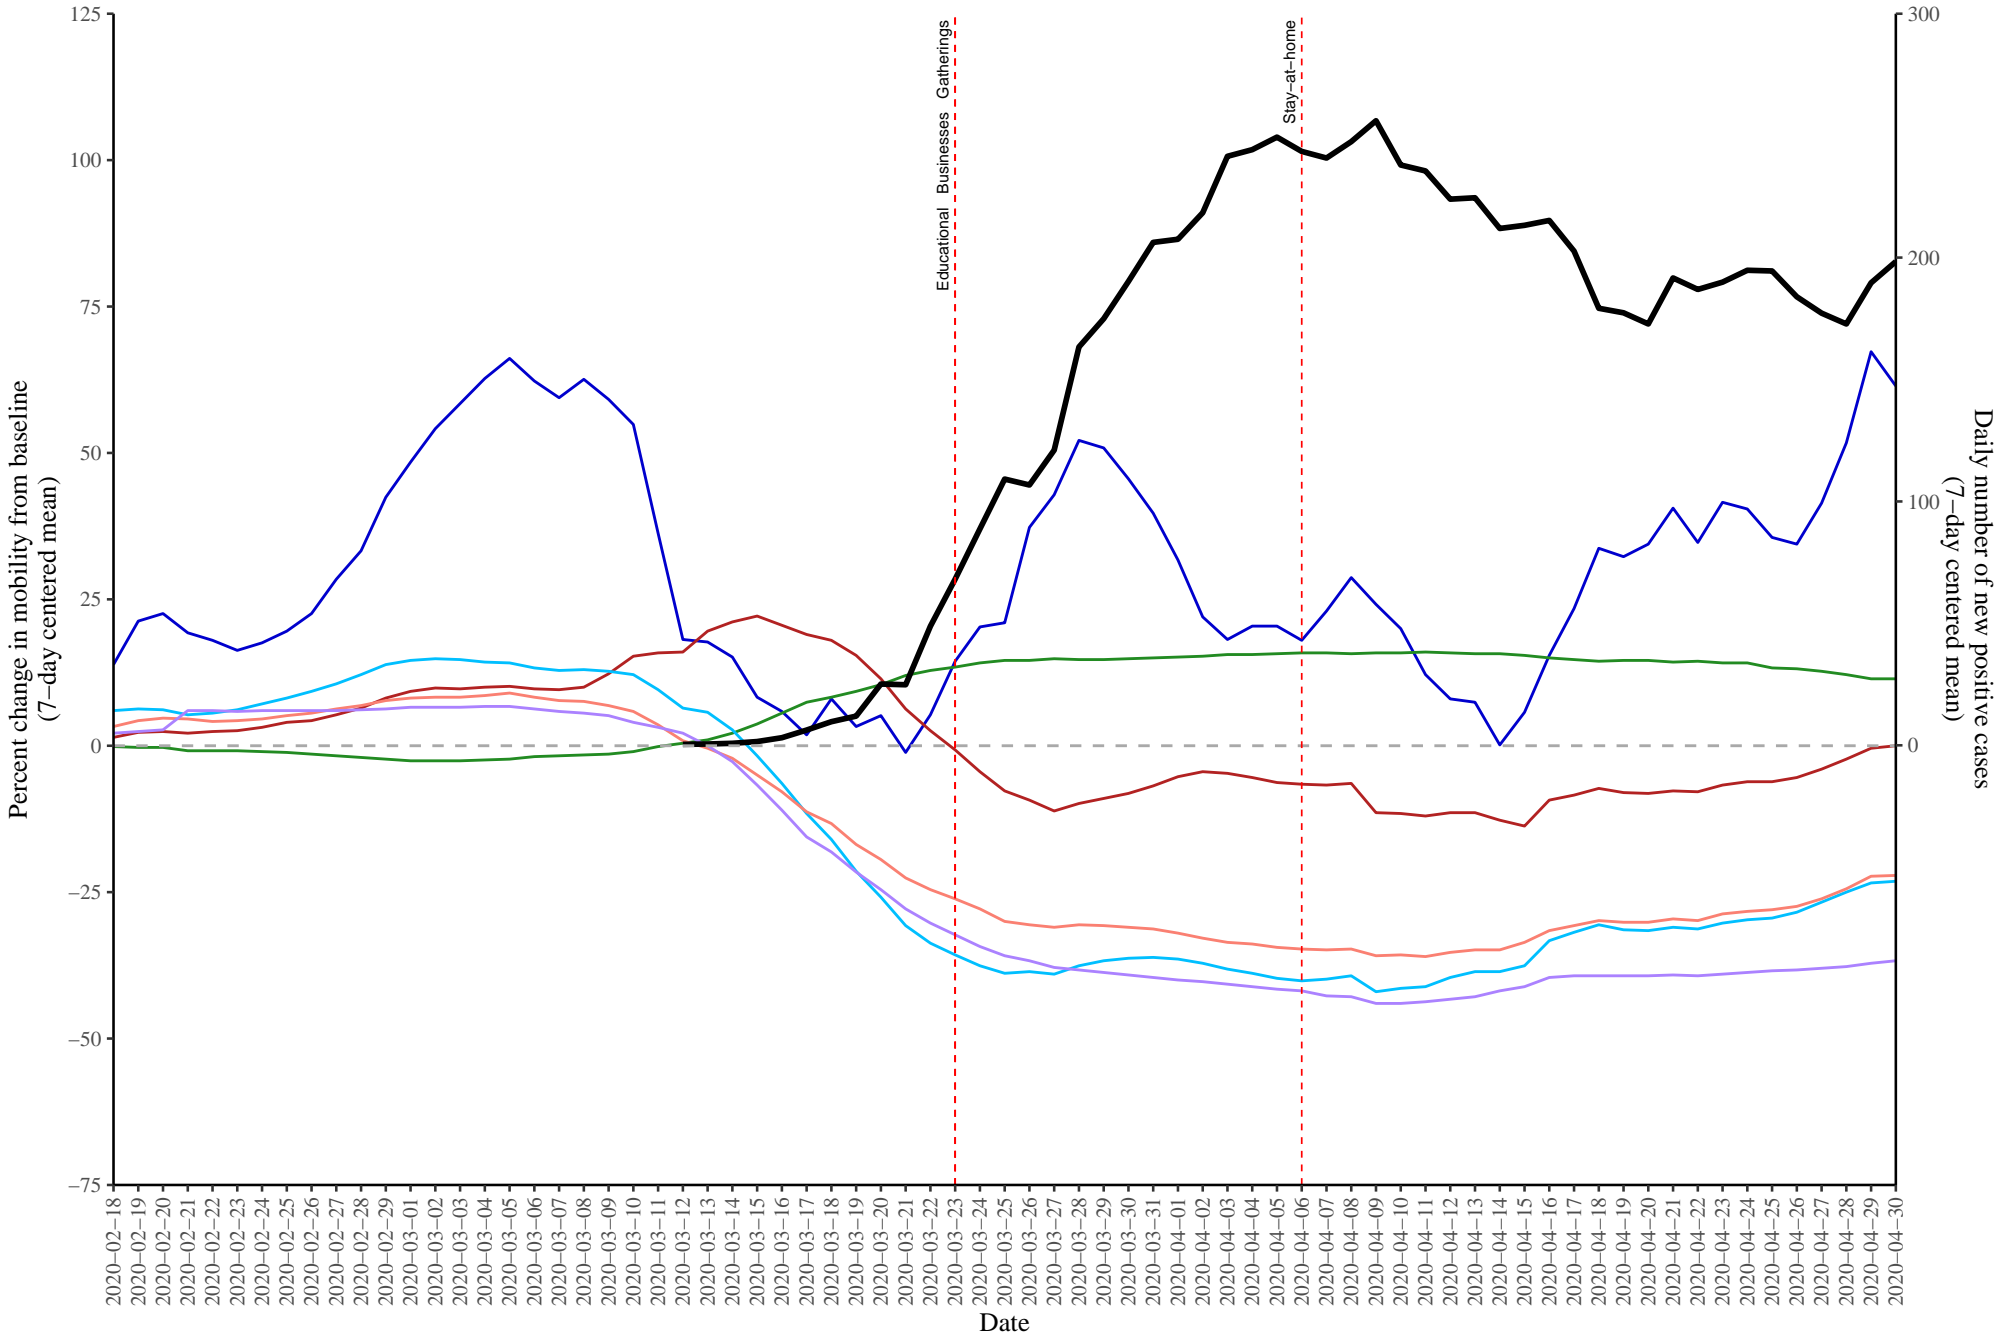

- Parks mobility
- Residential mobility
- Transit stations mobility
- SARS-CoV-2 Cases
- Grocery and pharmacy mobility
- Retail and recreation mobility
- Workplace mobility

# Montana

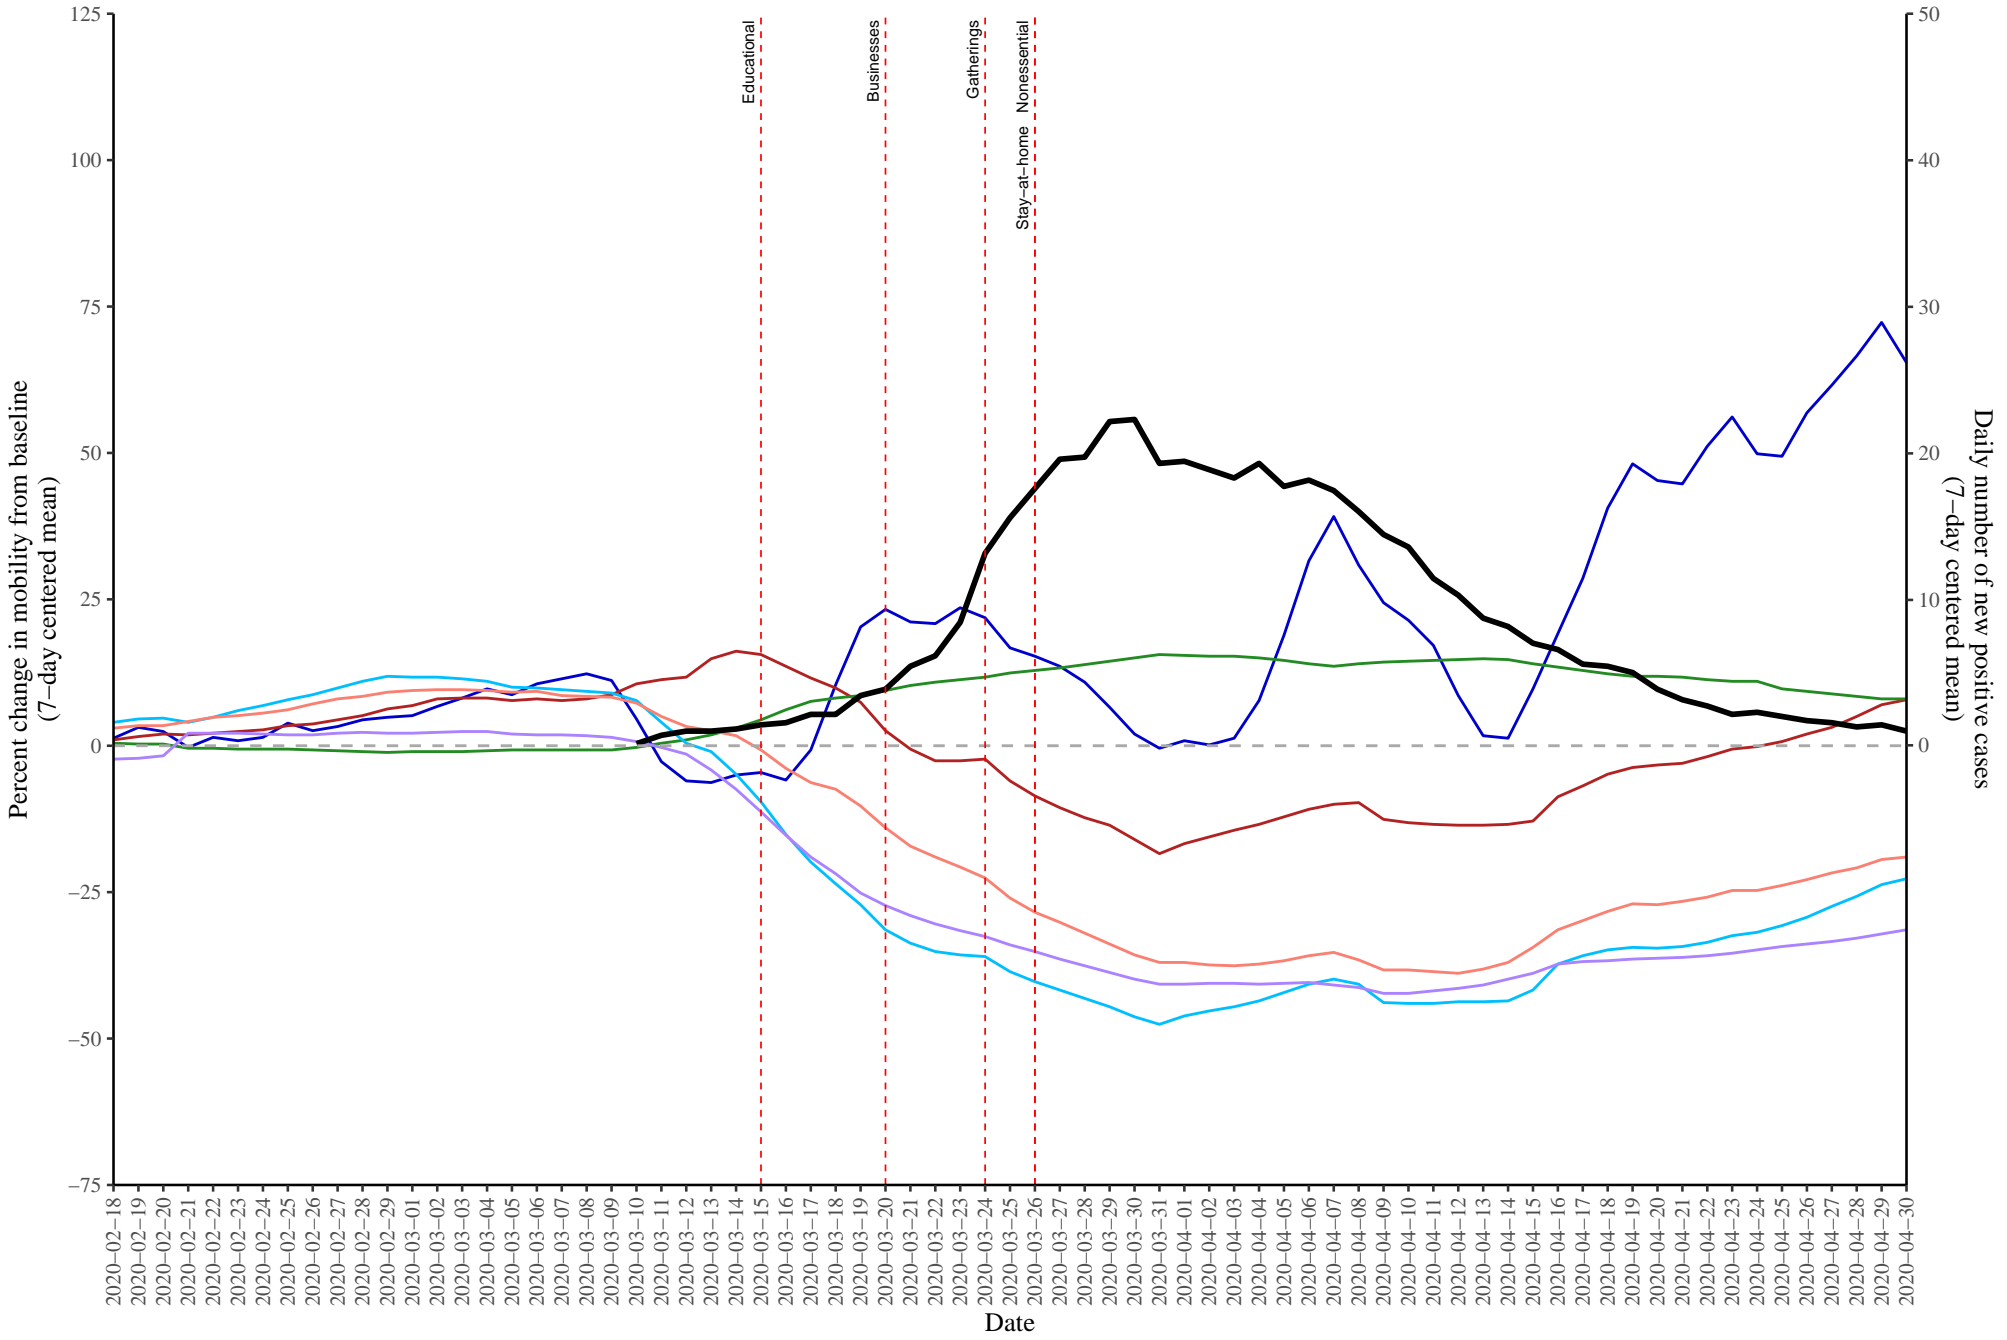

- Parks mobility
- Residential mobility
- Transit stations mobility
- SARS-CoV-2 Cases
- Grocery and pharmacy mobility
- Retail and recreation mobility
- Workplace mobility

# Nebraska

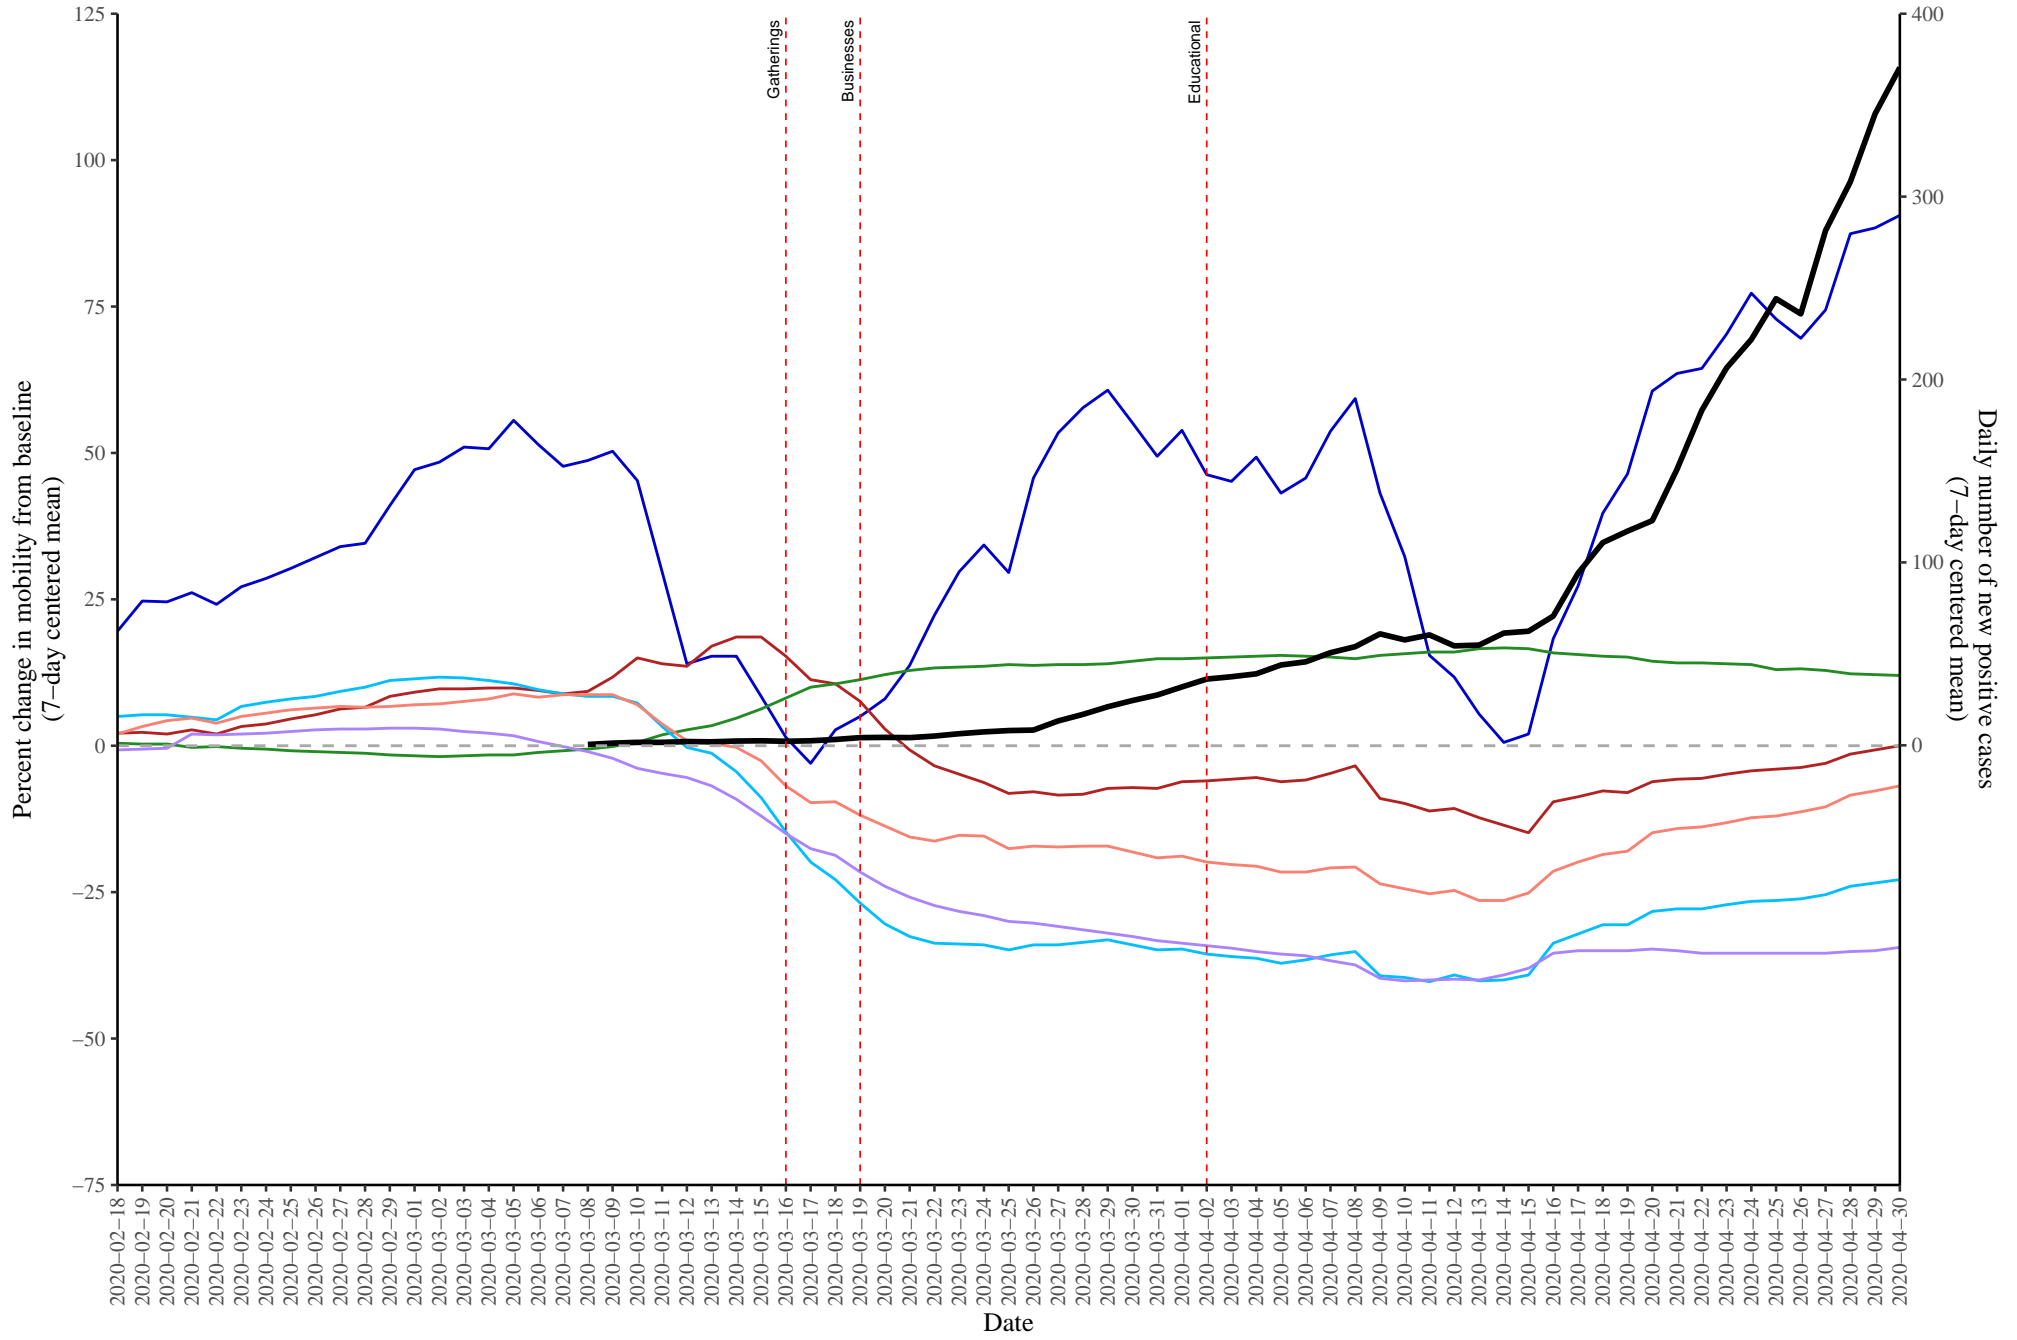

- Parks mobility
- Residential mobility
- Transit stations mobility
- SARS-CoV-2 Cases
- Grocery and pharmacy mobility
- Retail and recreation mobility
- Workplace mobility

# Nevada

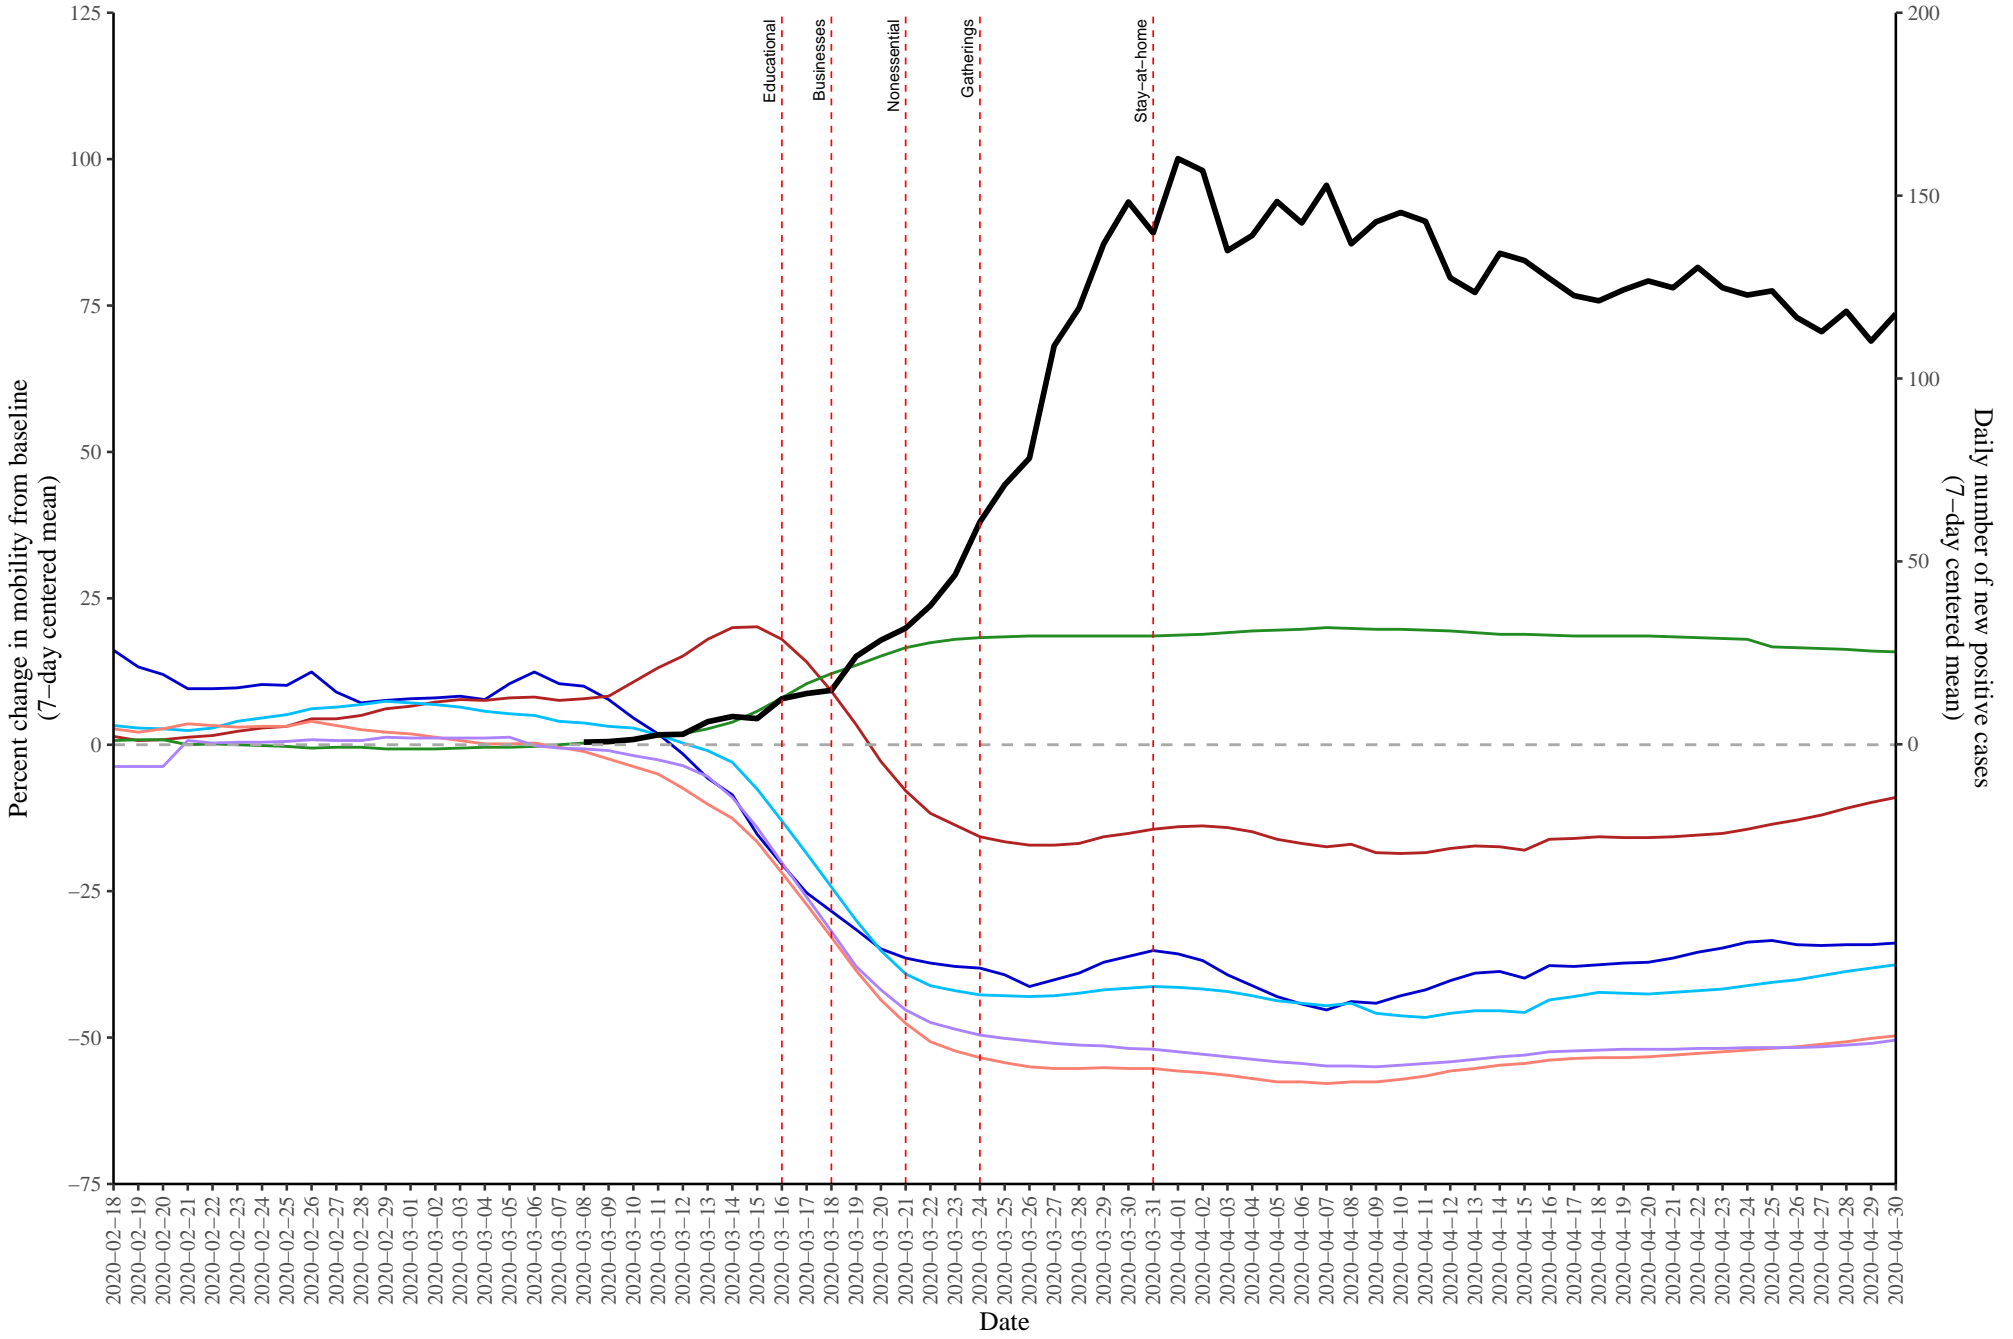

- Parks mobility
- Residential mobility
- Transit stations mobility
- SARS-CoV-2 Cases
- Grocery and pharmacy mobility
- Retail and recreation mobility
- Workplace mobility

# New\_Hampshire

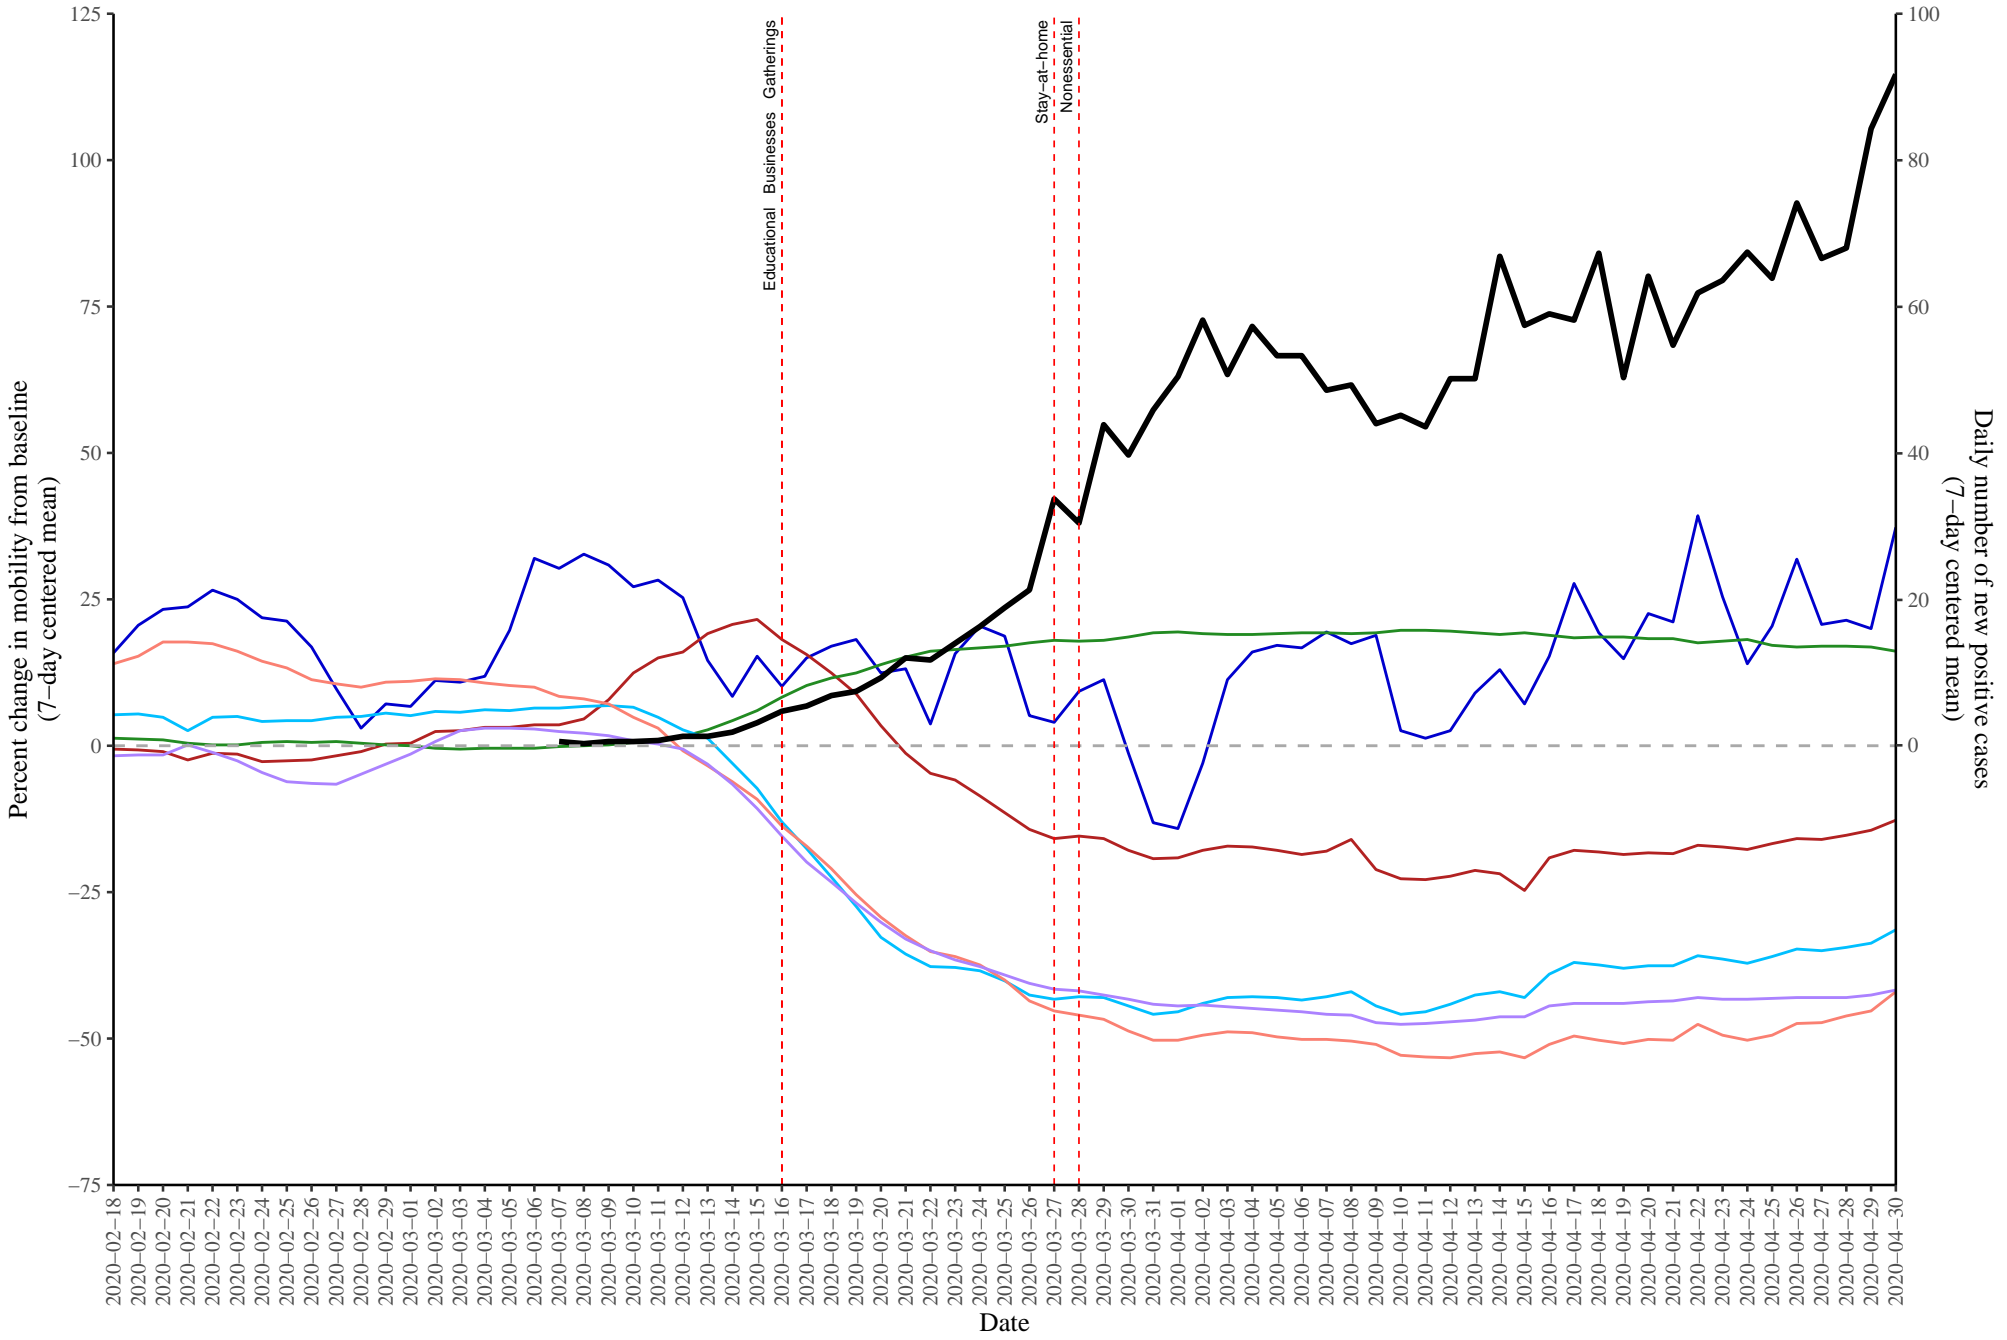

- Parks mobility
- Residential mobility
- Transit stations mobility
- SARS-CoV-2 Cases
- Grocery and pharmacy mobility
- Retail and recreation mobility
- Workplace mobility

# New\_Jersey

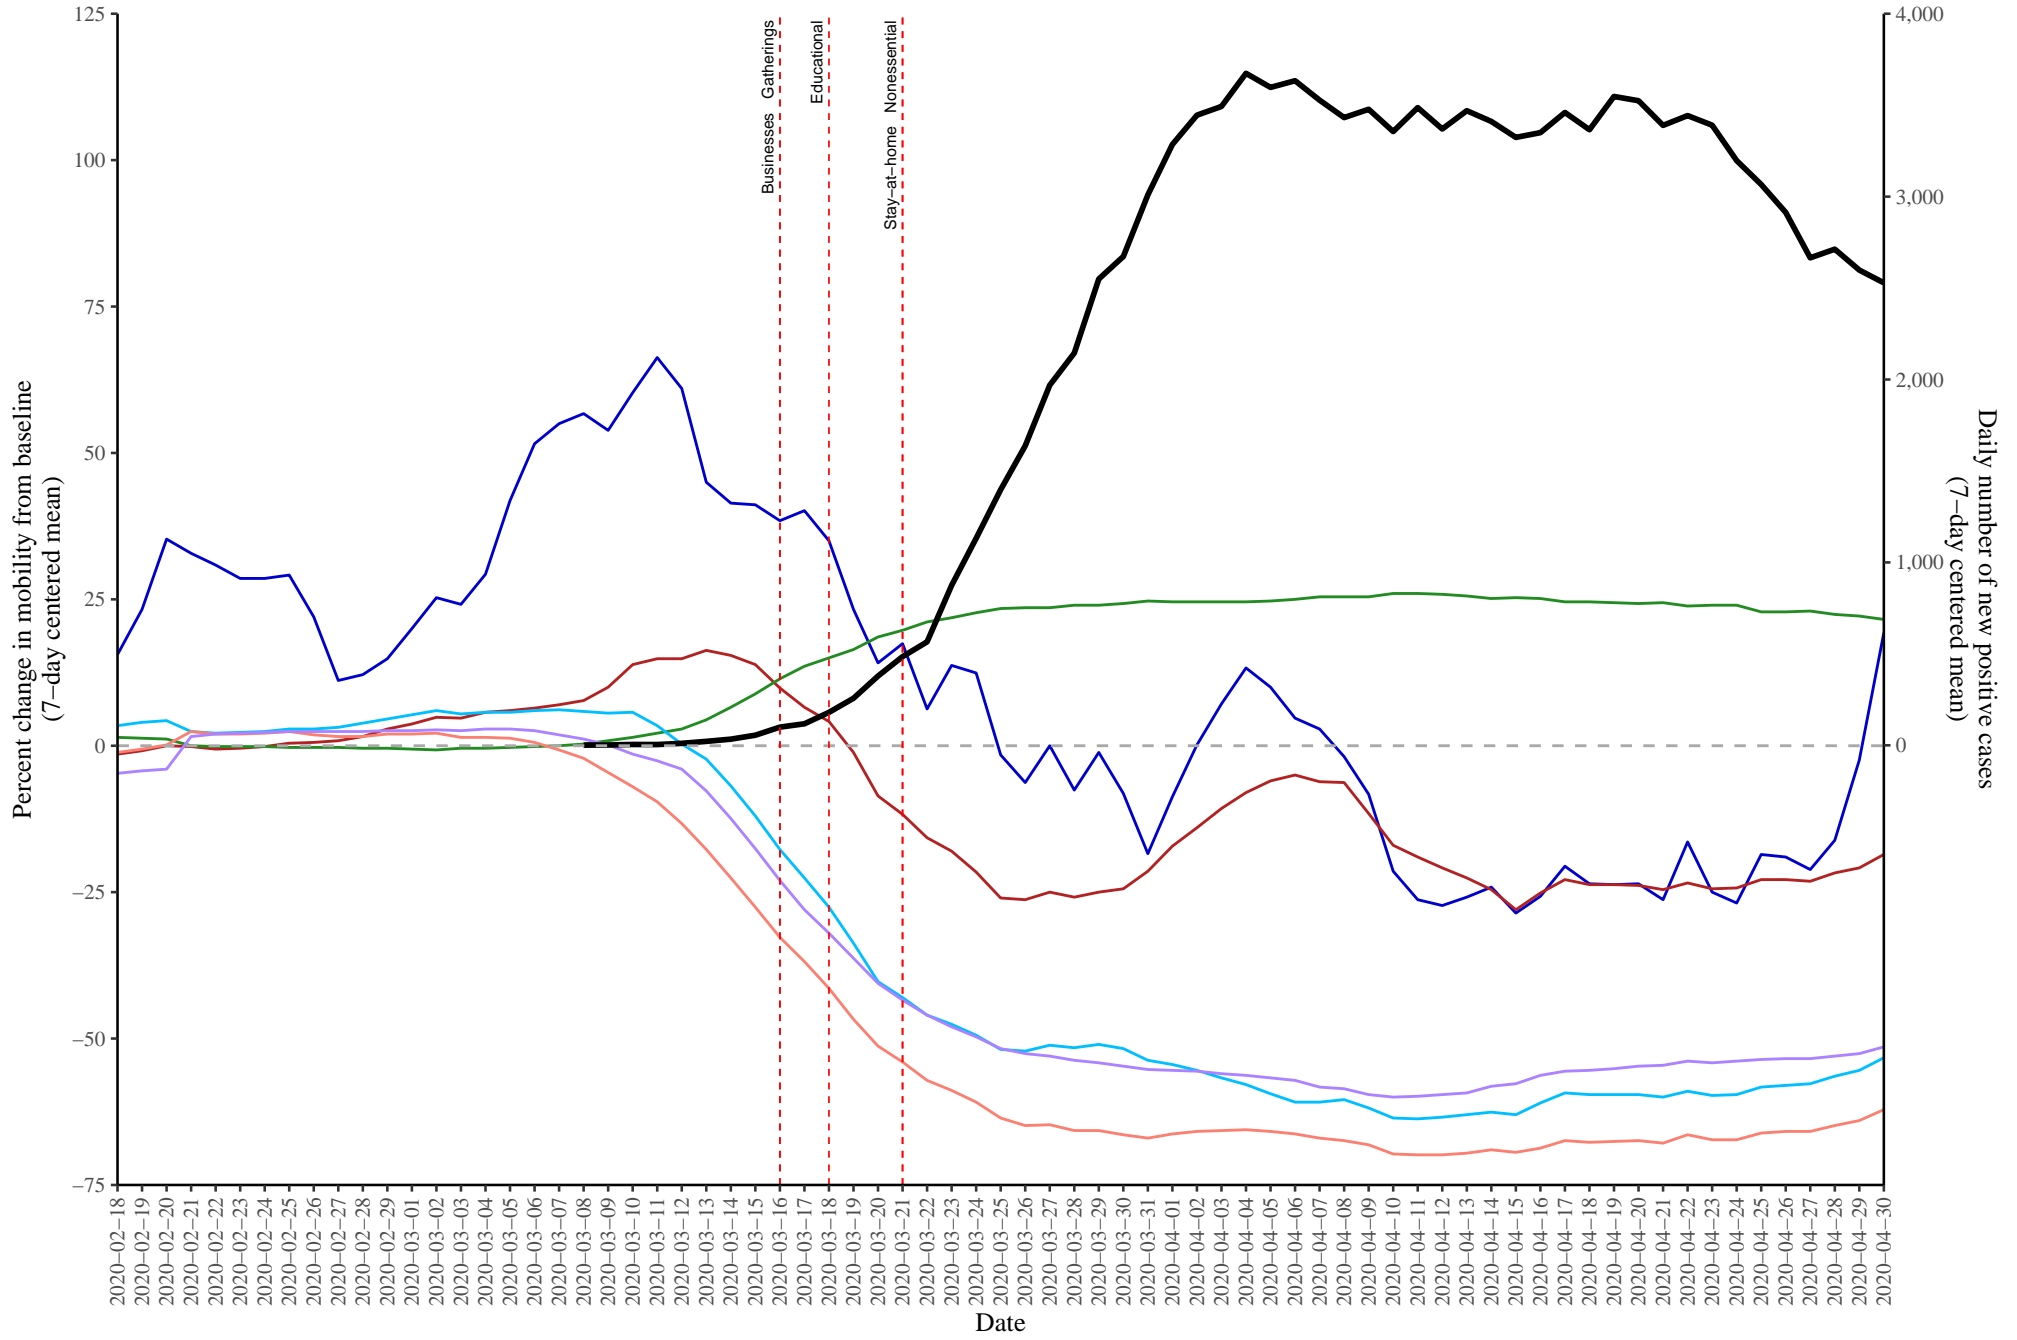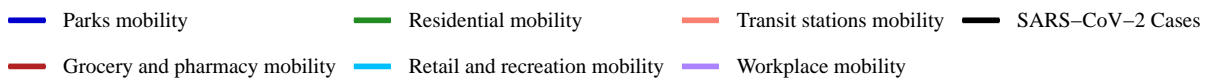



# New\_Mexico

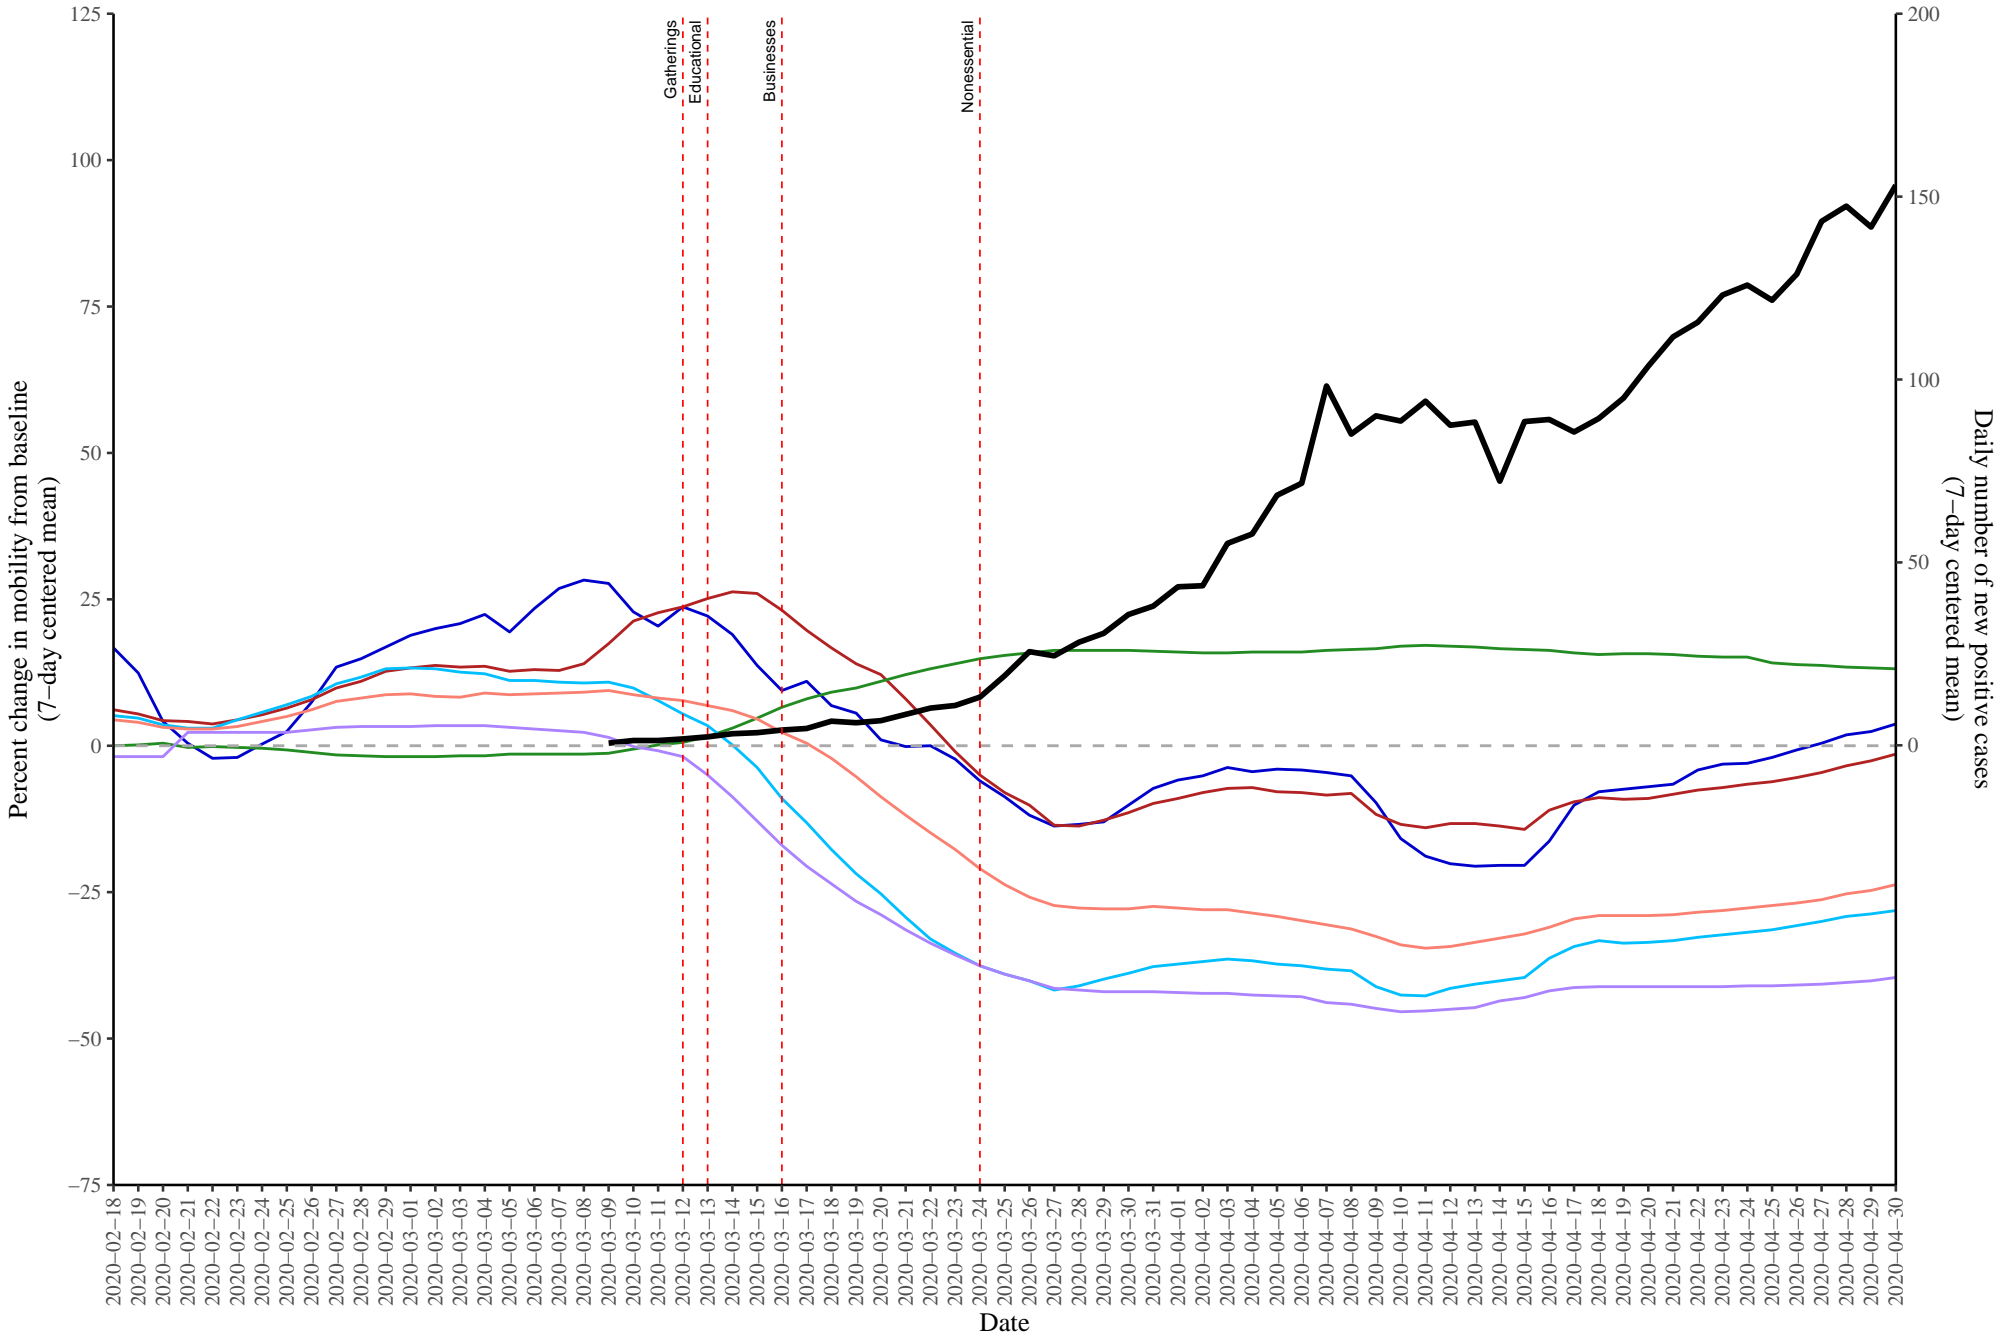

- Parks mobility
- Residential mobility
- Transit stations mobility
- SARS-CoV-2 Cases
- Grocery and pharmacy mobility
- Retail and recreation mobility
- Workplace mobility

# New\_York

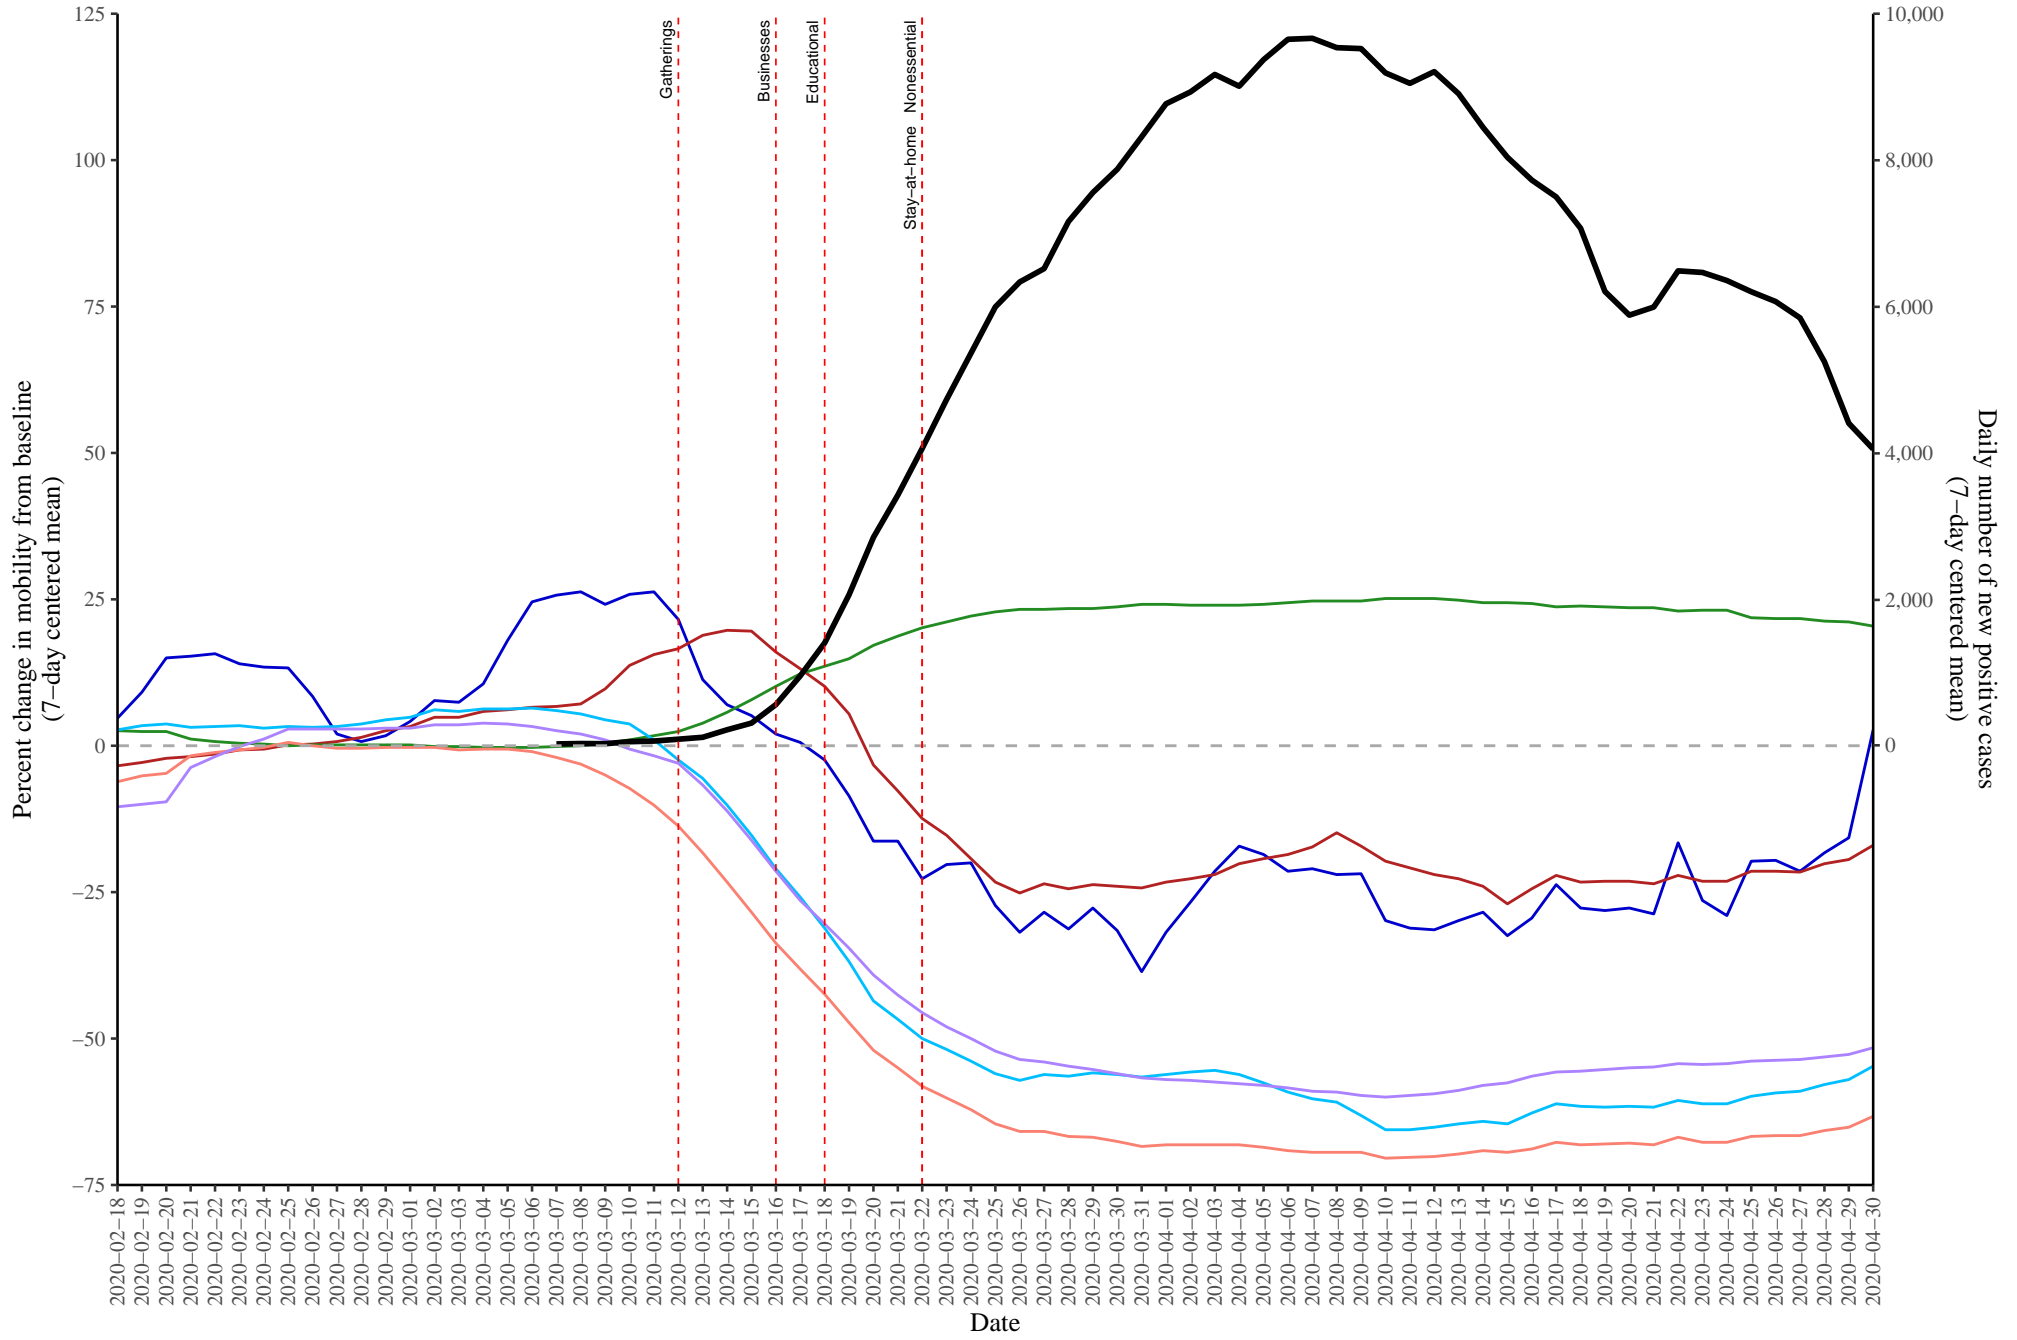

- Parks mobility
- Residential mobility
- Transit stations mobility
- SARS-CoV-2 Cases
- Grocery and pharmacy mobility
- Retail and recreation mobility
- Workplace mobility

# North\_Carolina

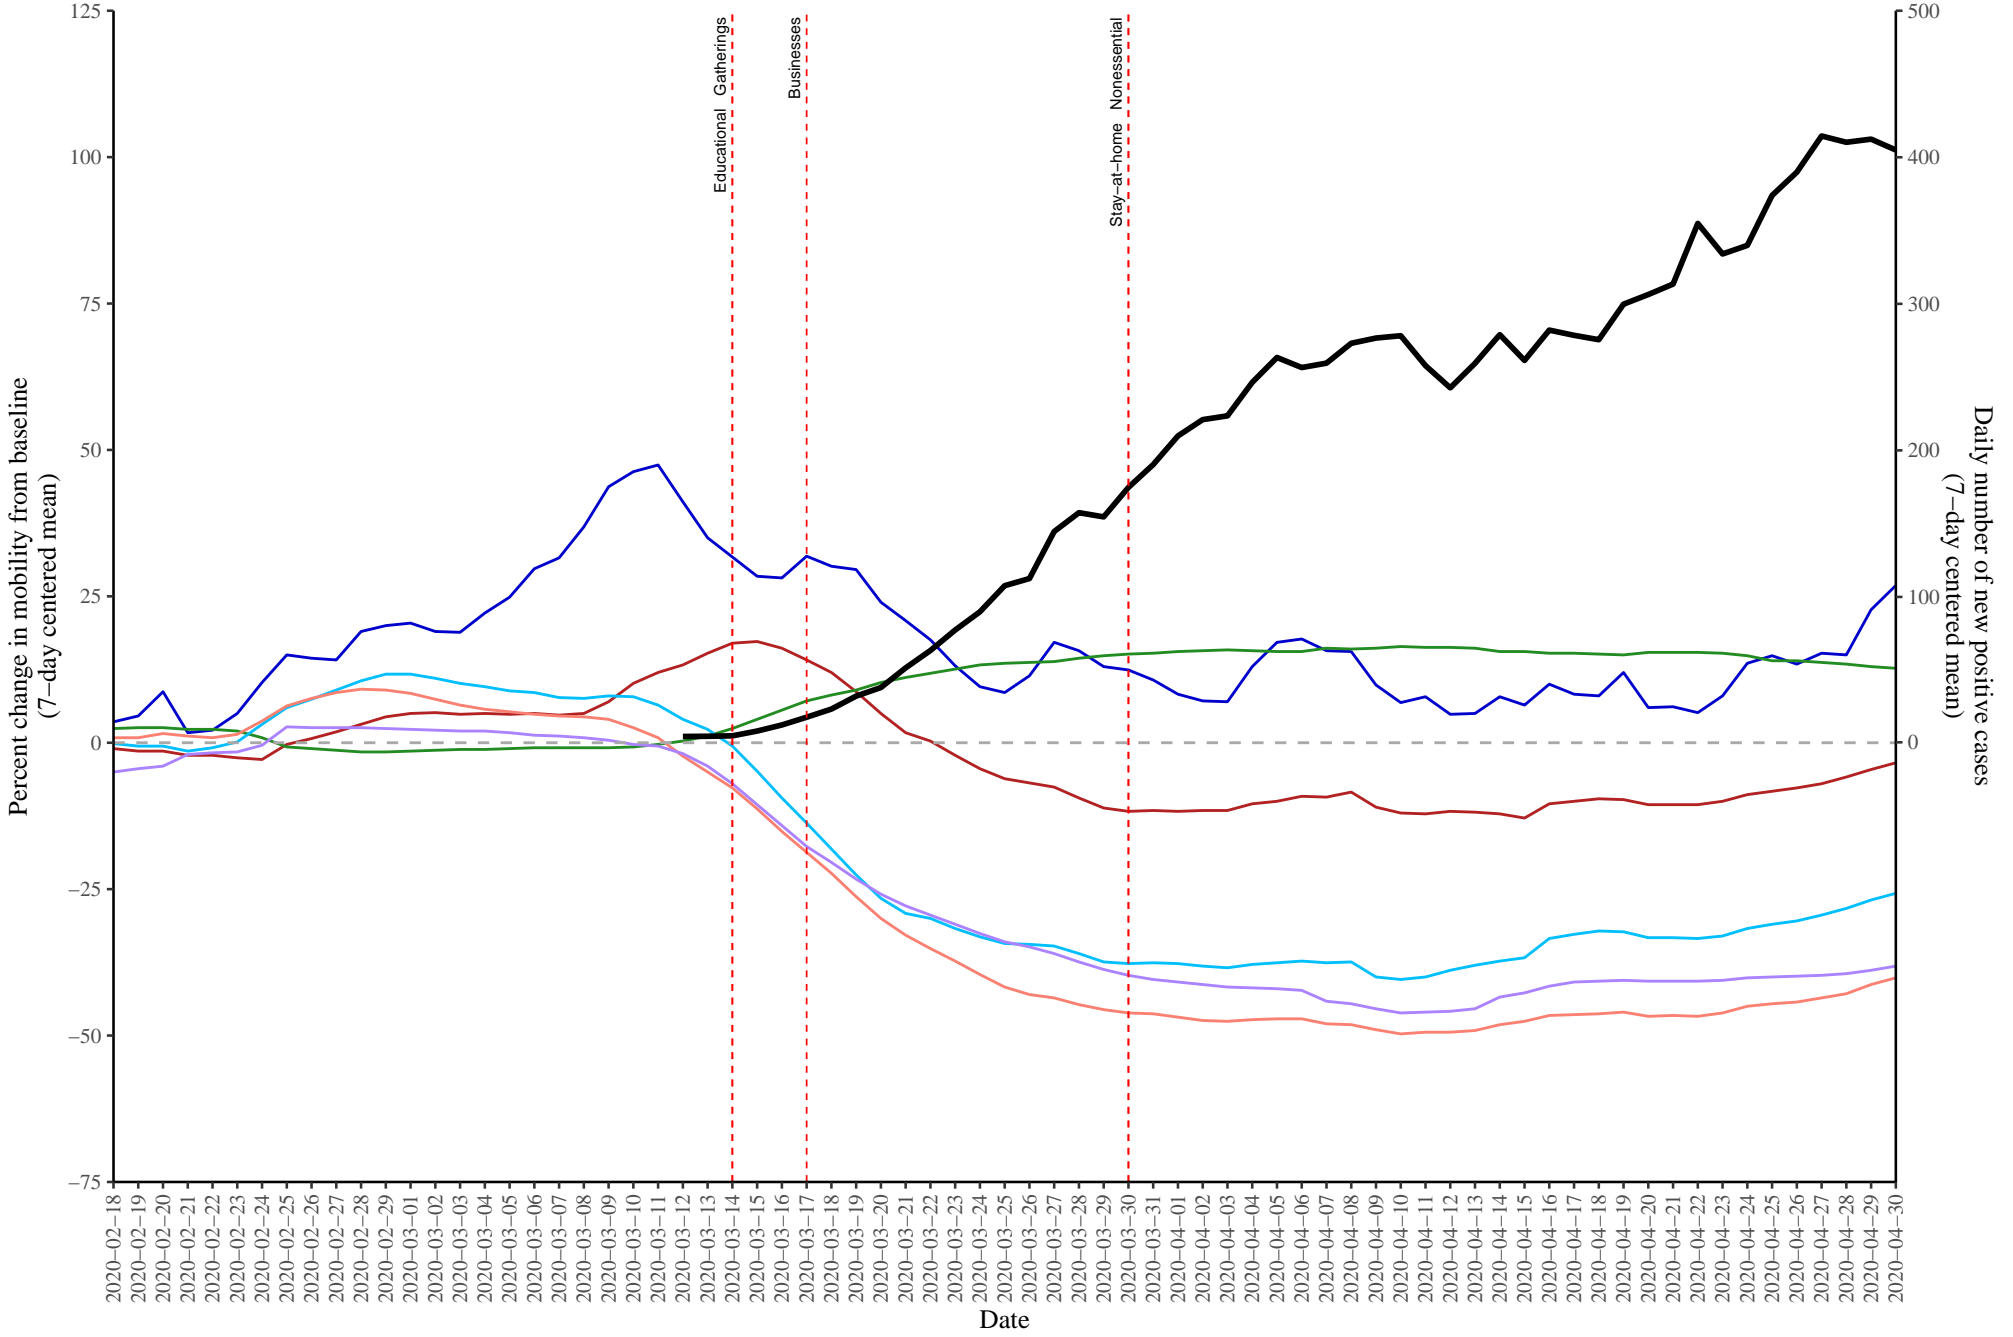

- Parks mobility
- Residential mobility
- Transit stations mobility
- SARS-CoV-2 Cases
- Grocery and pharmacy mobility
- Retail and recreation mobility
- Workplace mobility

# North\_Dakota

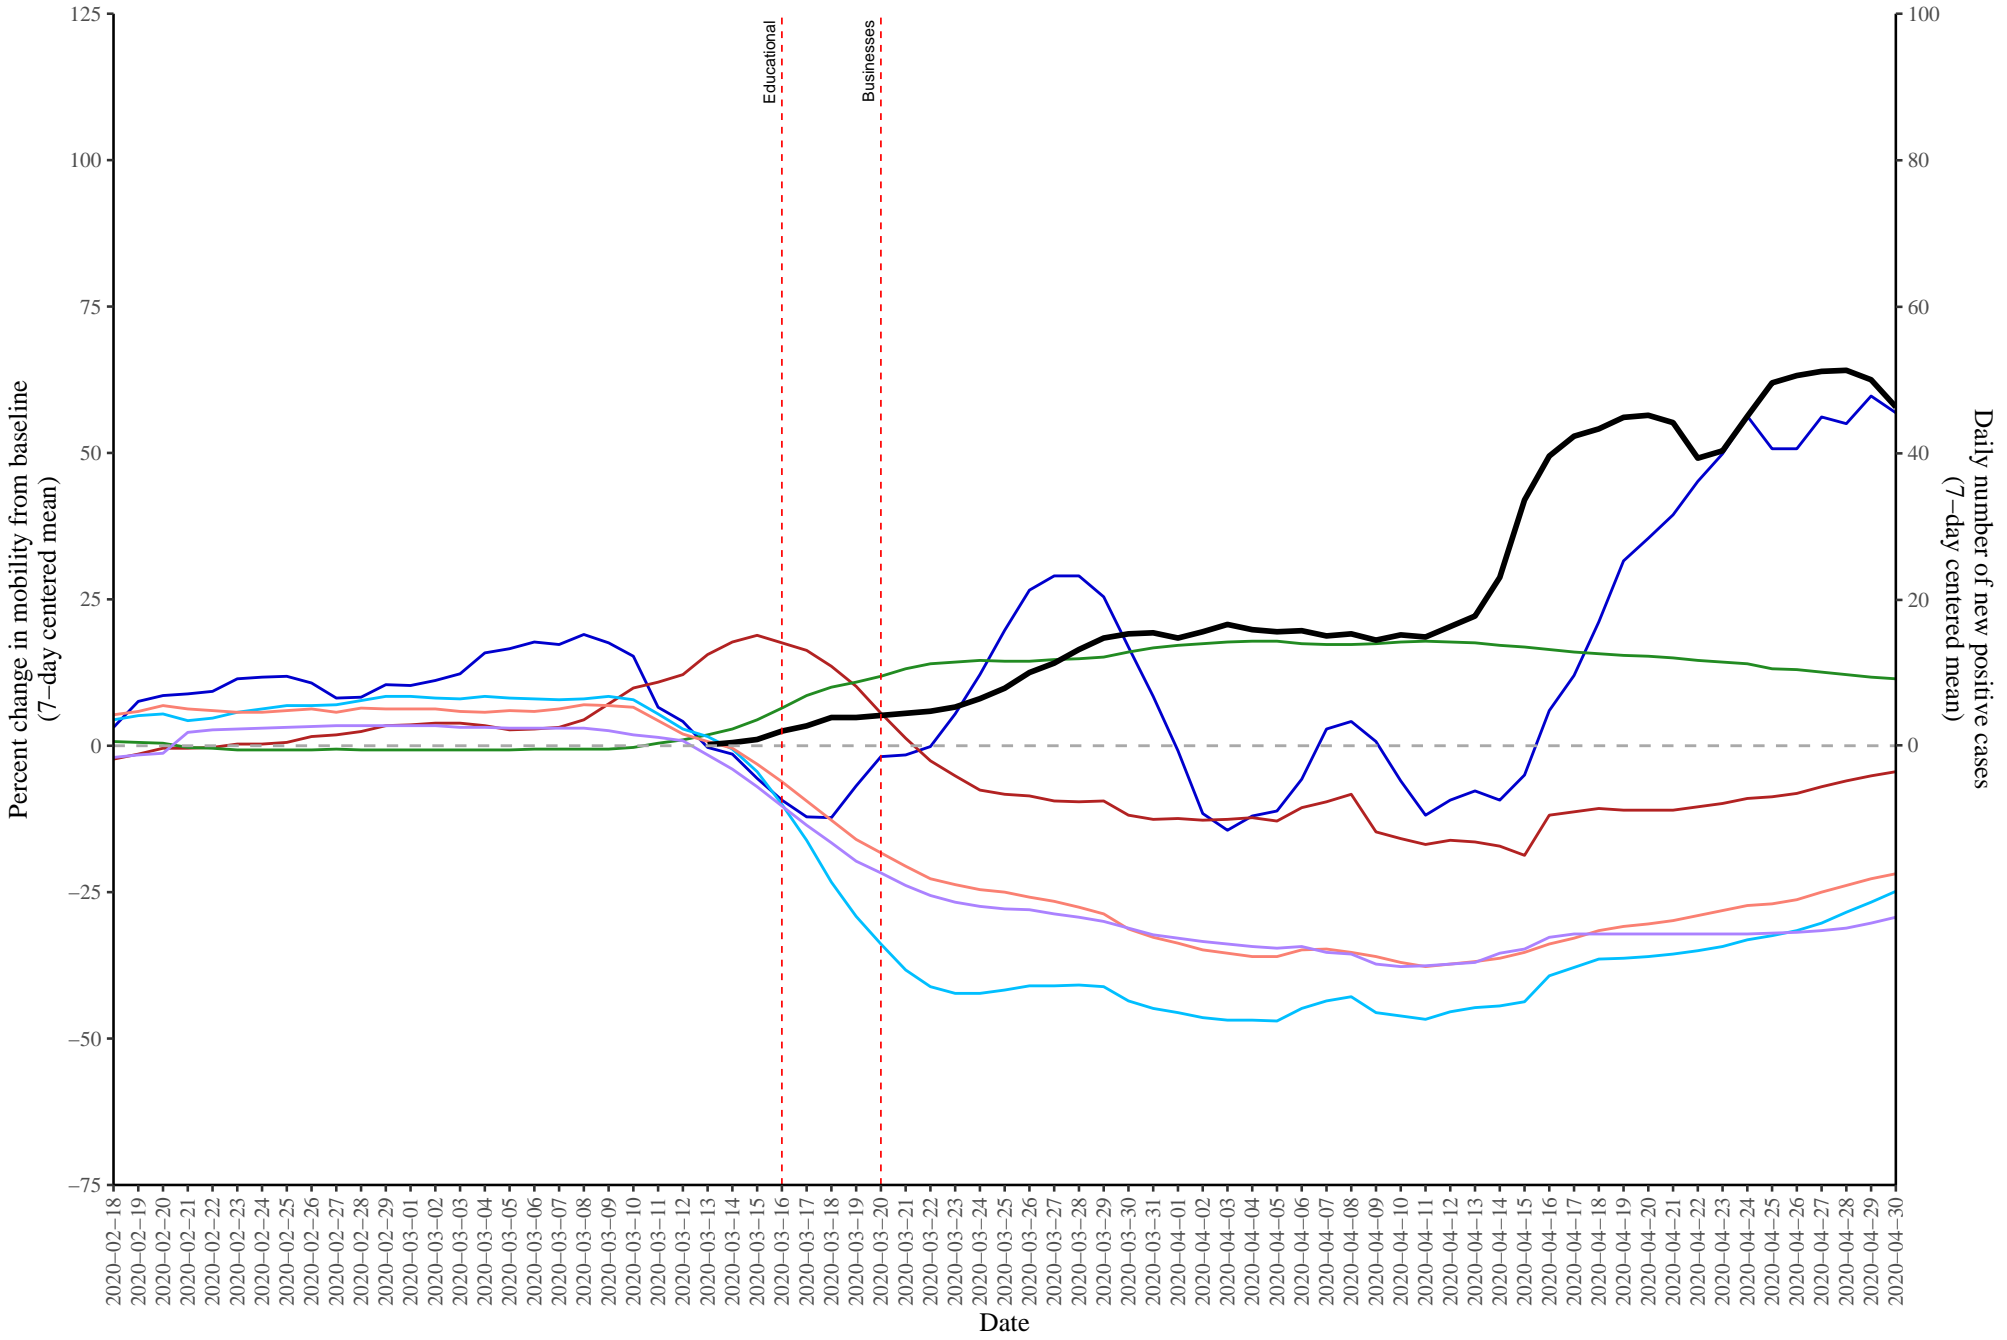

- Parks mobility
- Residential mobility
- Transit stations mobility
- SARS-CoV-2 Cases
- Grocery and pharmacy mobility
- Retail and recreation mobility
- Workplace mobility

# Ohio

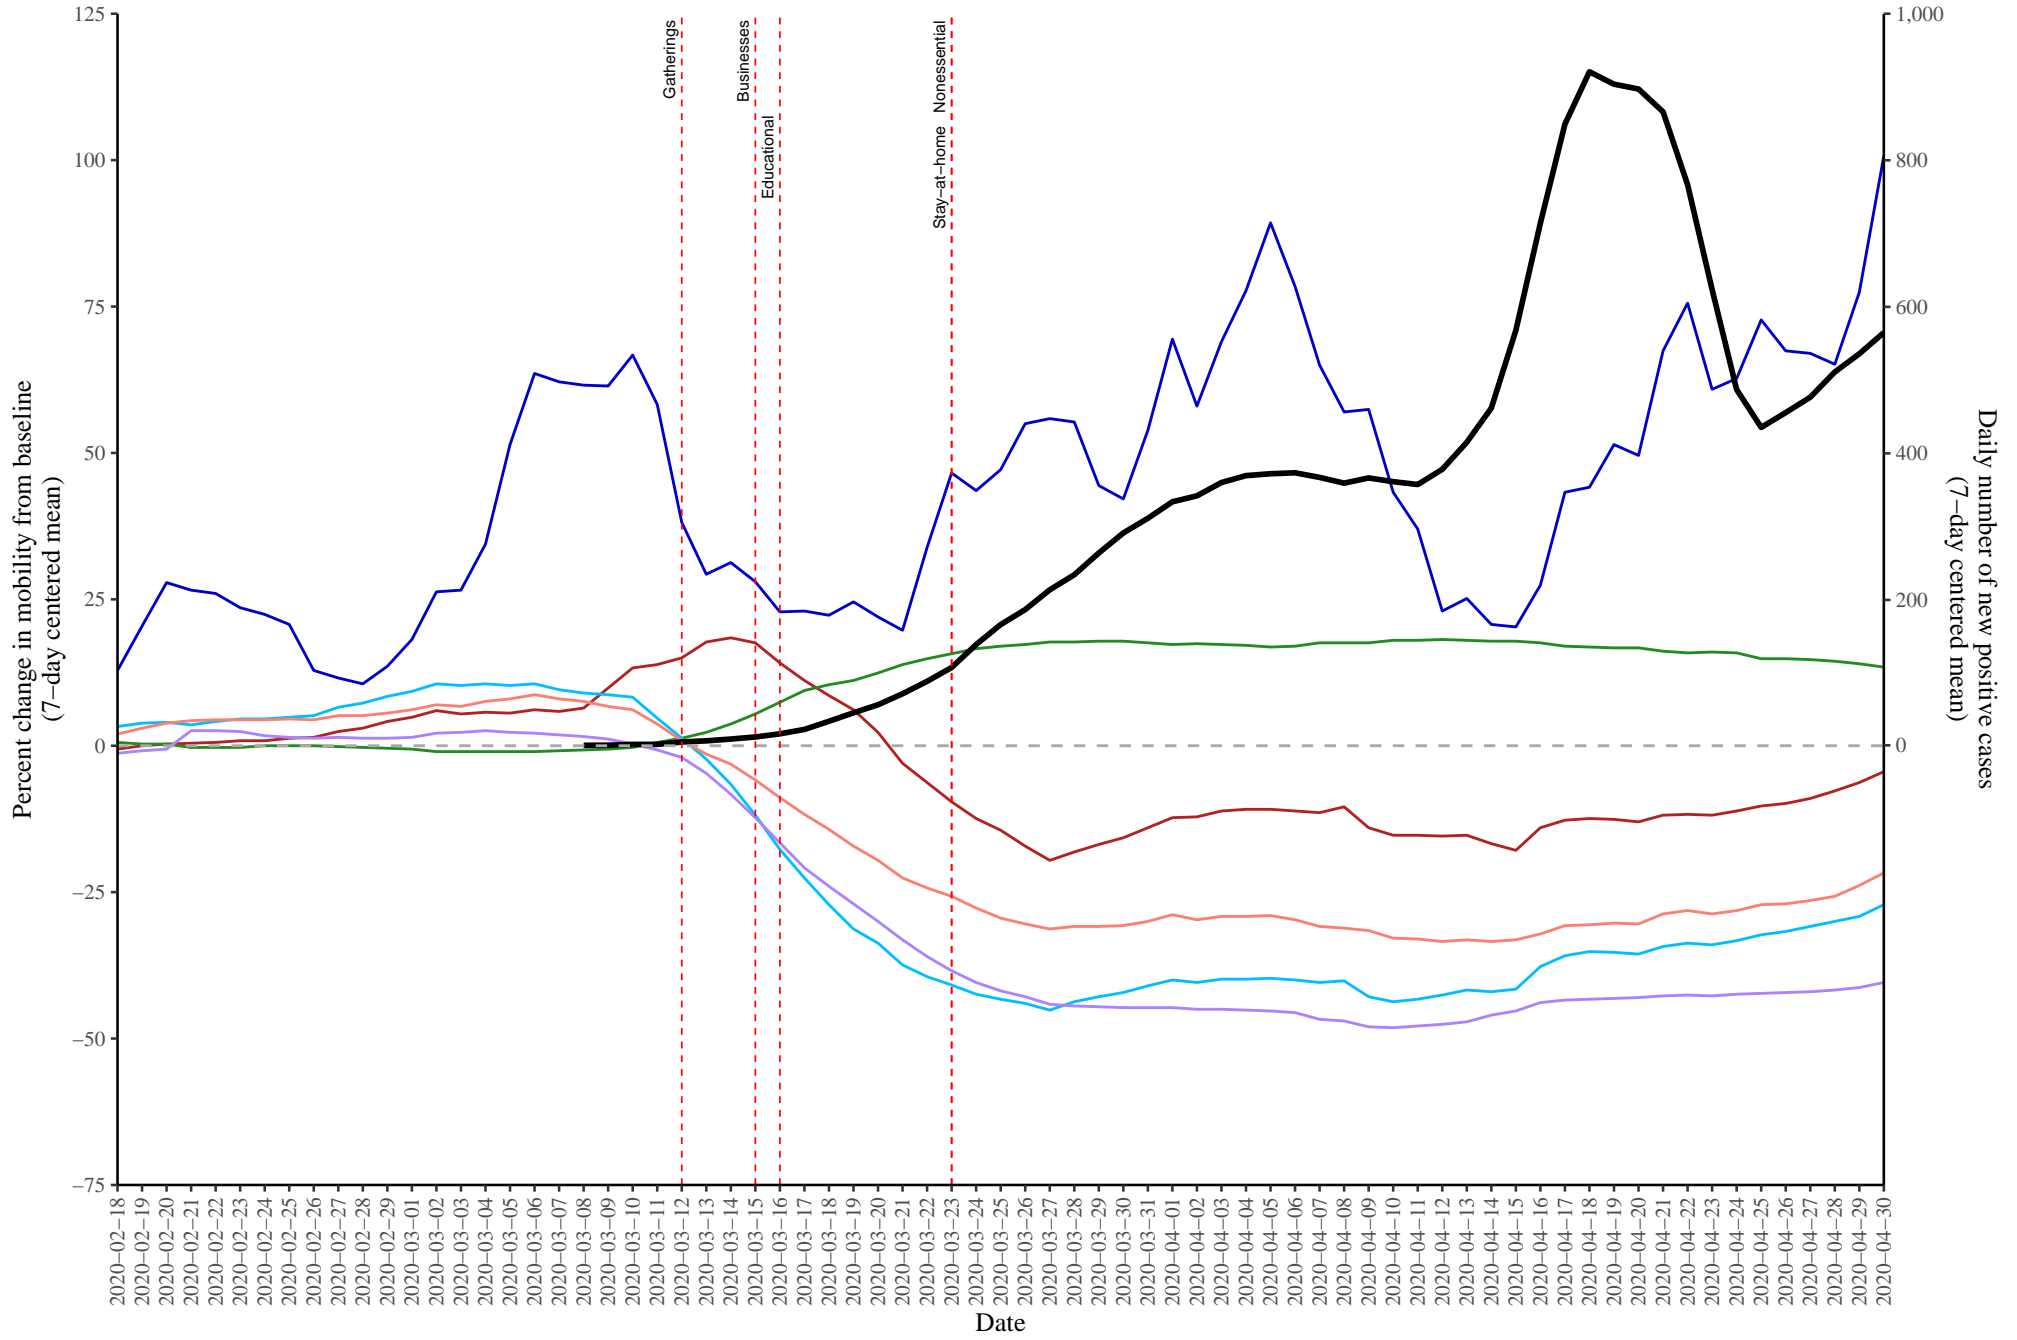

# Oklahoma

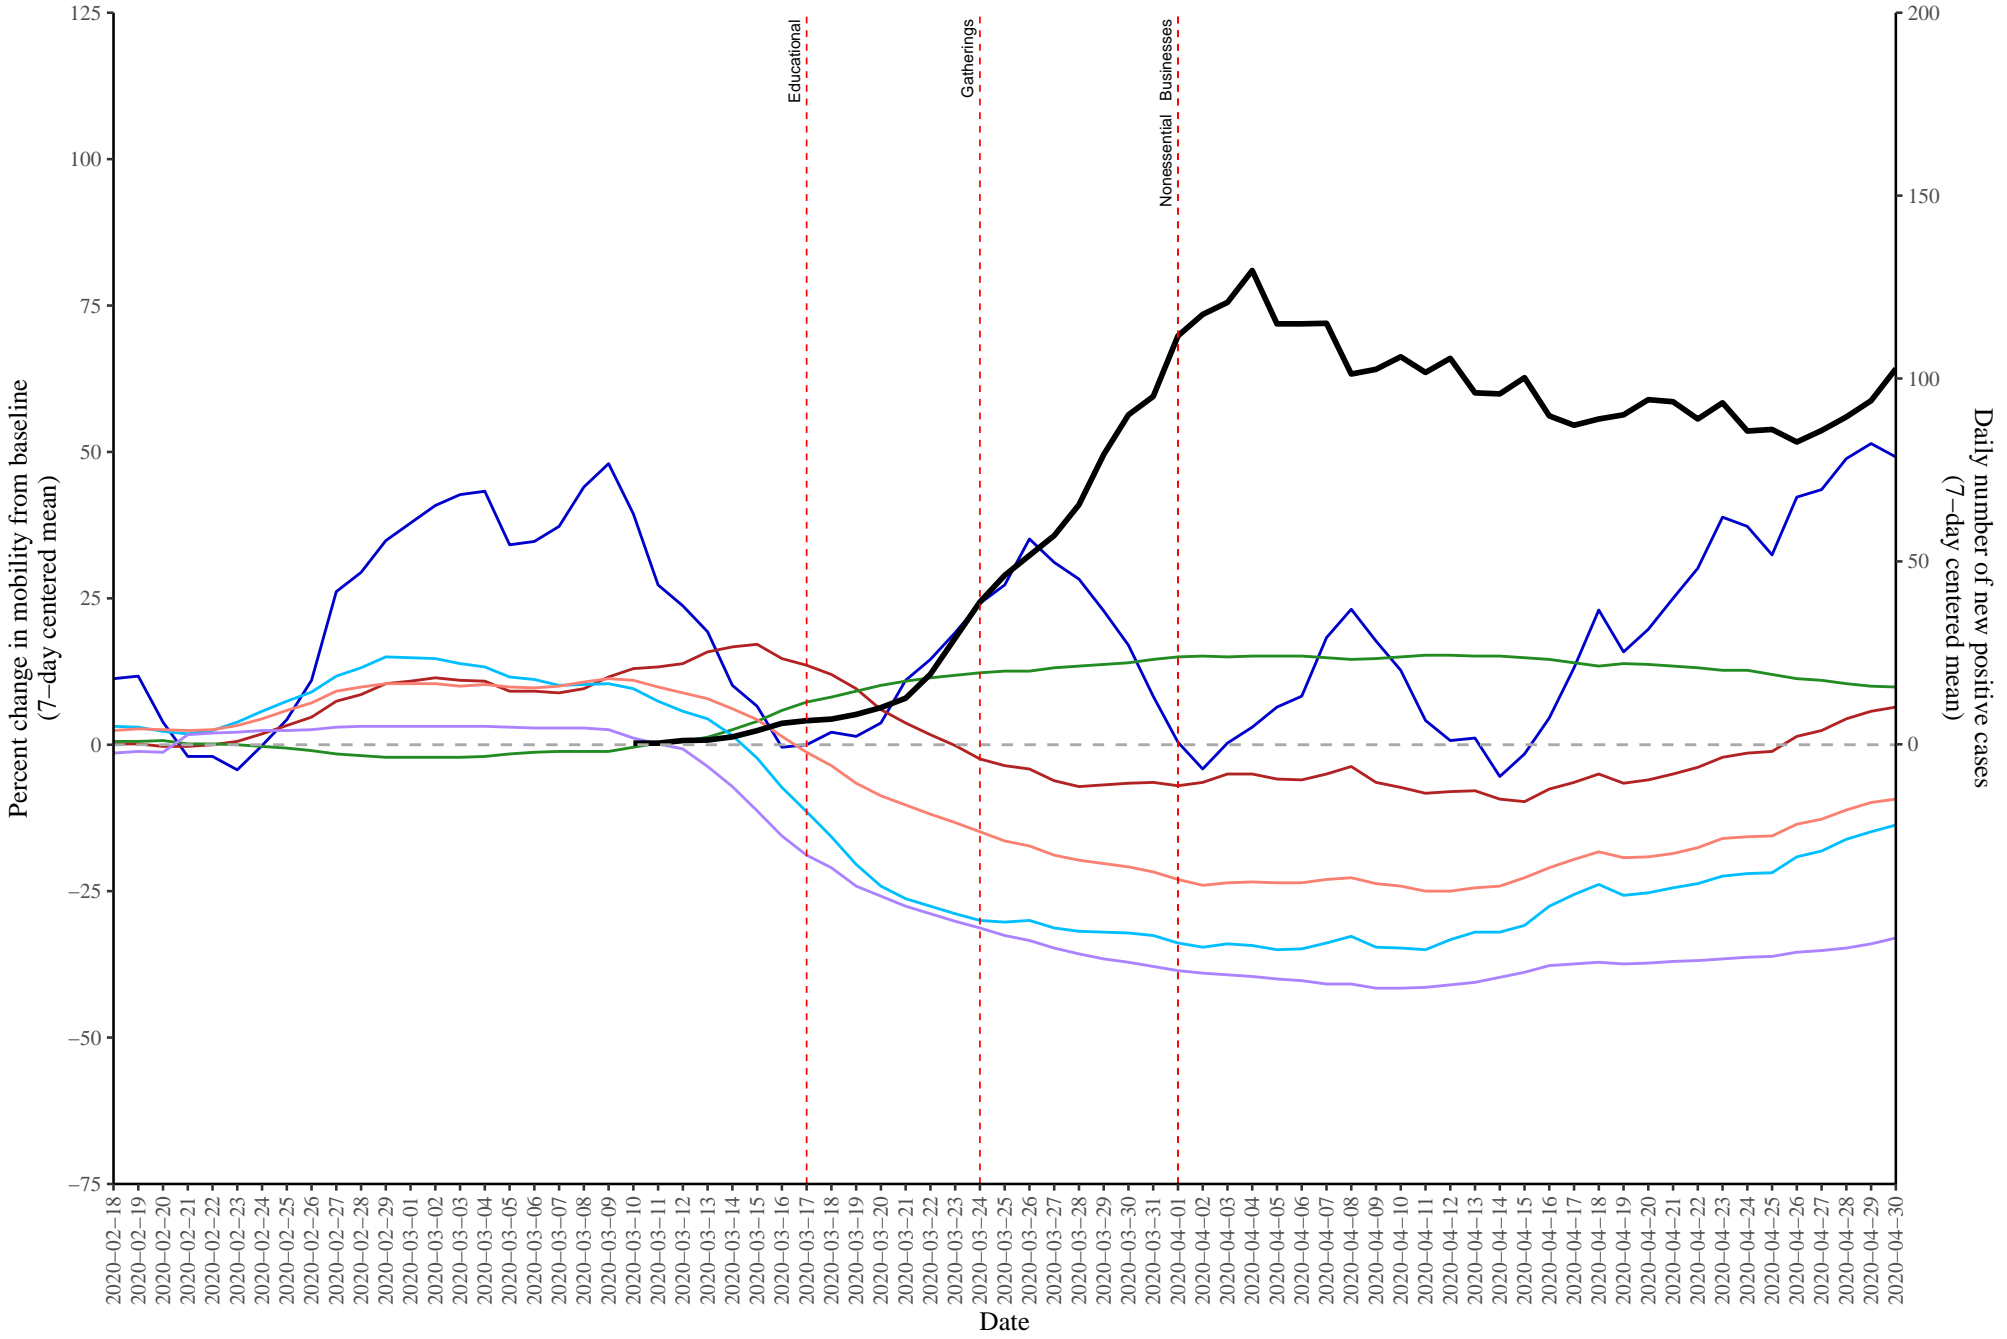

- Parks mobility
- Residential mobility
- Transit stations mobility
- SARS-CoV-2 Cases
- Grocery and pharmacy mobility
- Retail and recreation mobility
- Workplace mobility

# Oregon

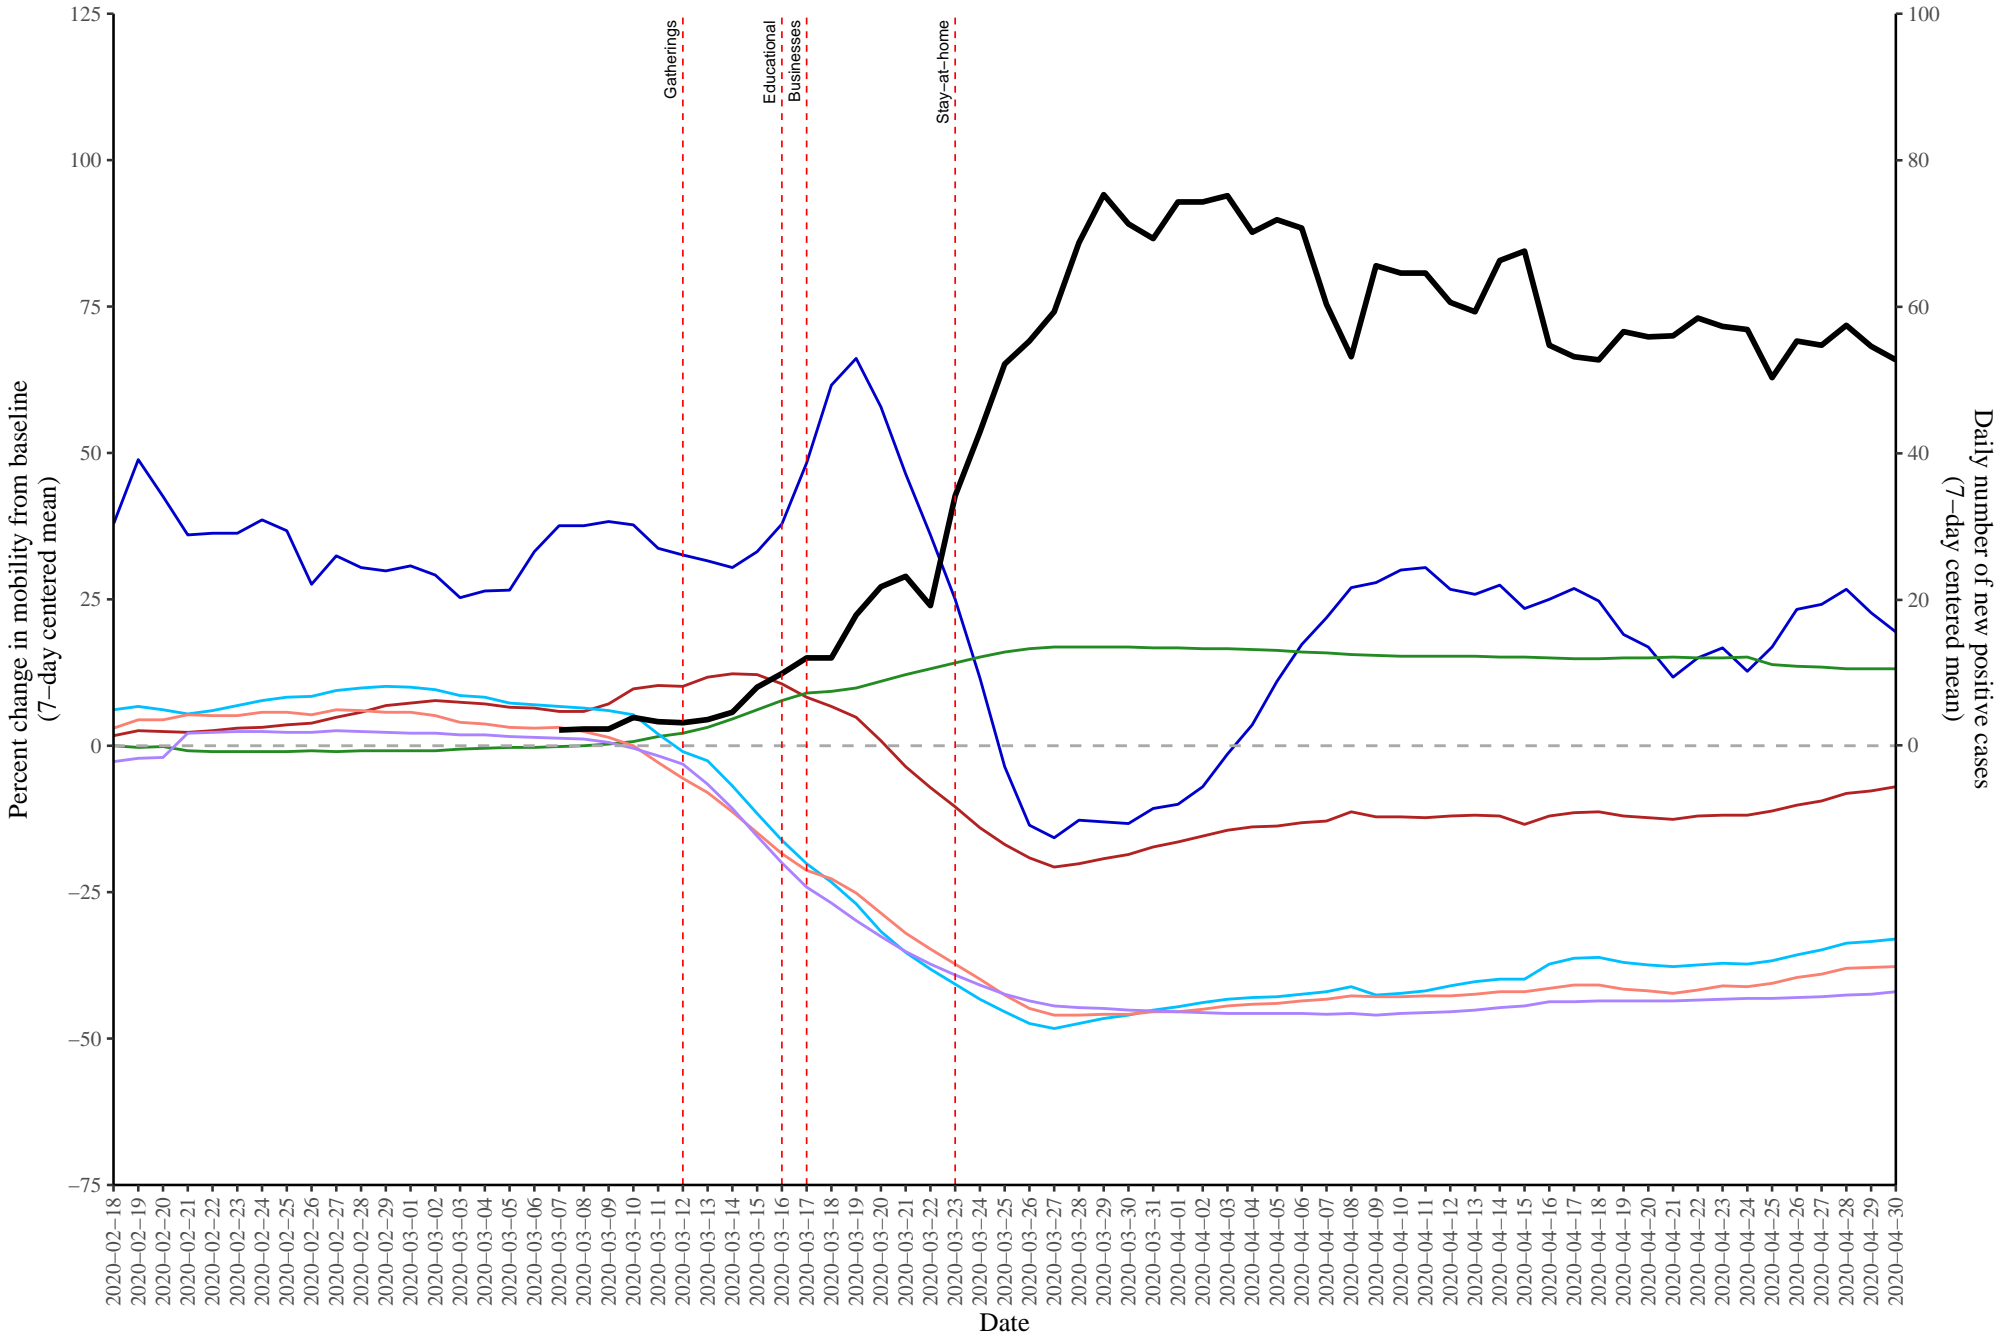

- Parks mobility
- Residential mobility
- Transit stations mobility
- SARS-CoV-2 Cases
- Grocery and pharmacy mobility
- Retail and recreation mobility
- Workplace mobility

# Pennsylvania

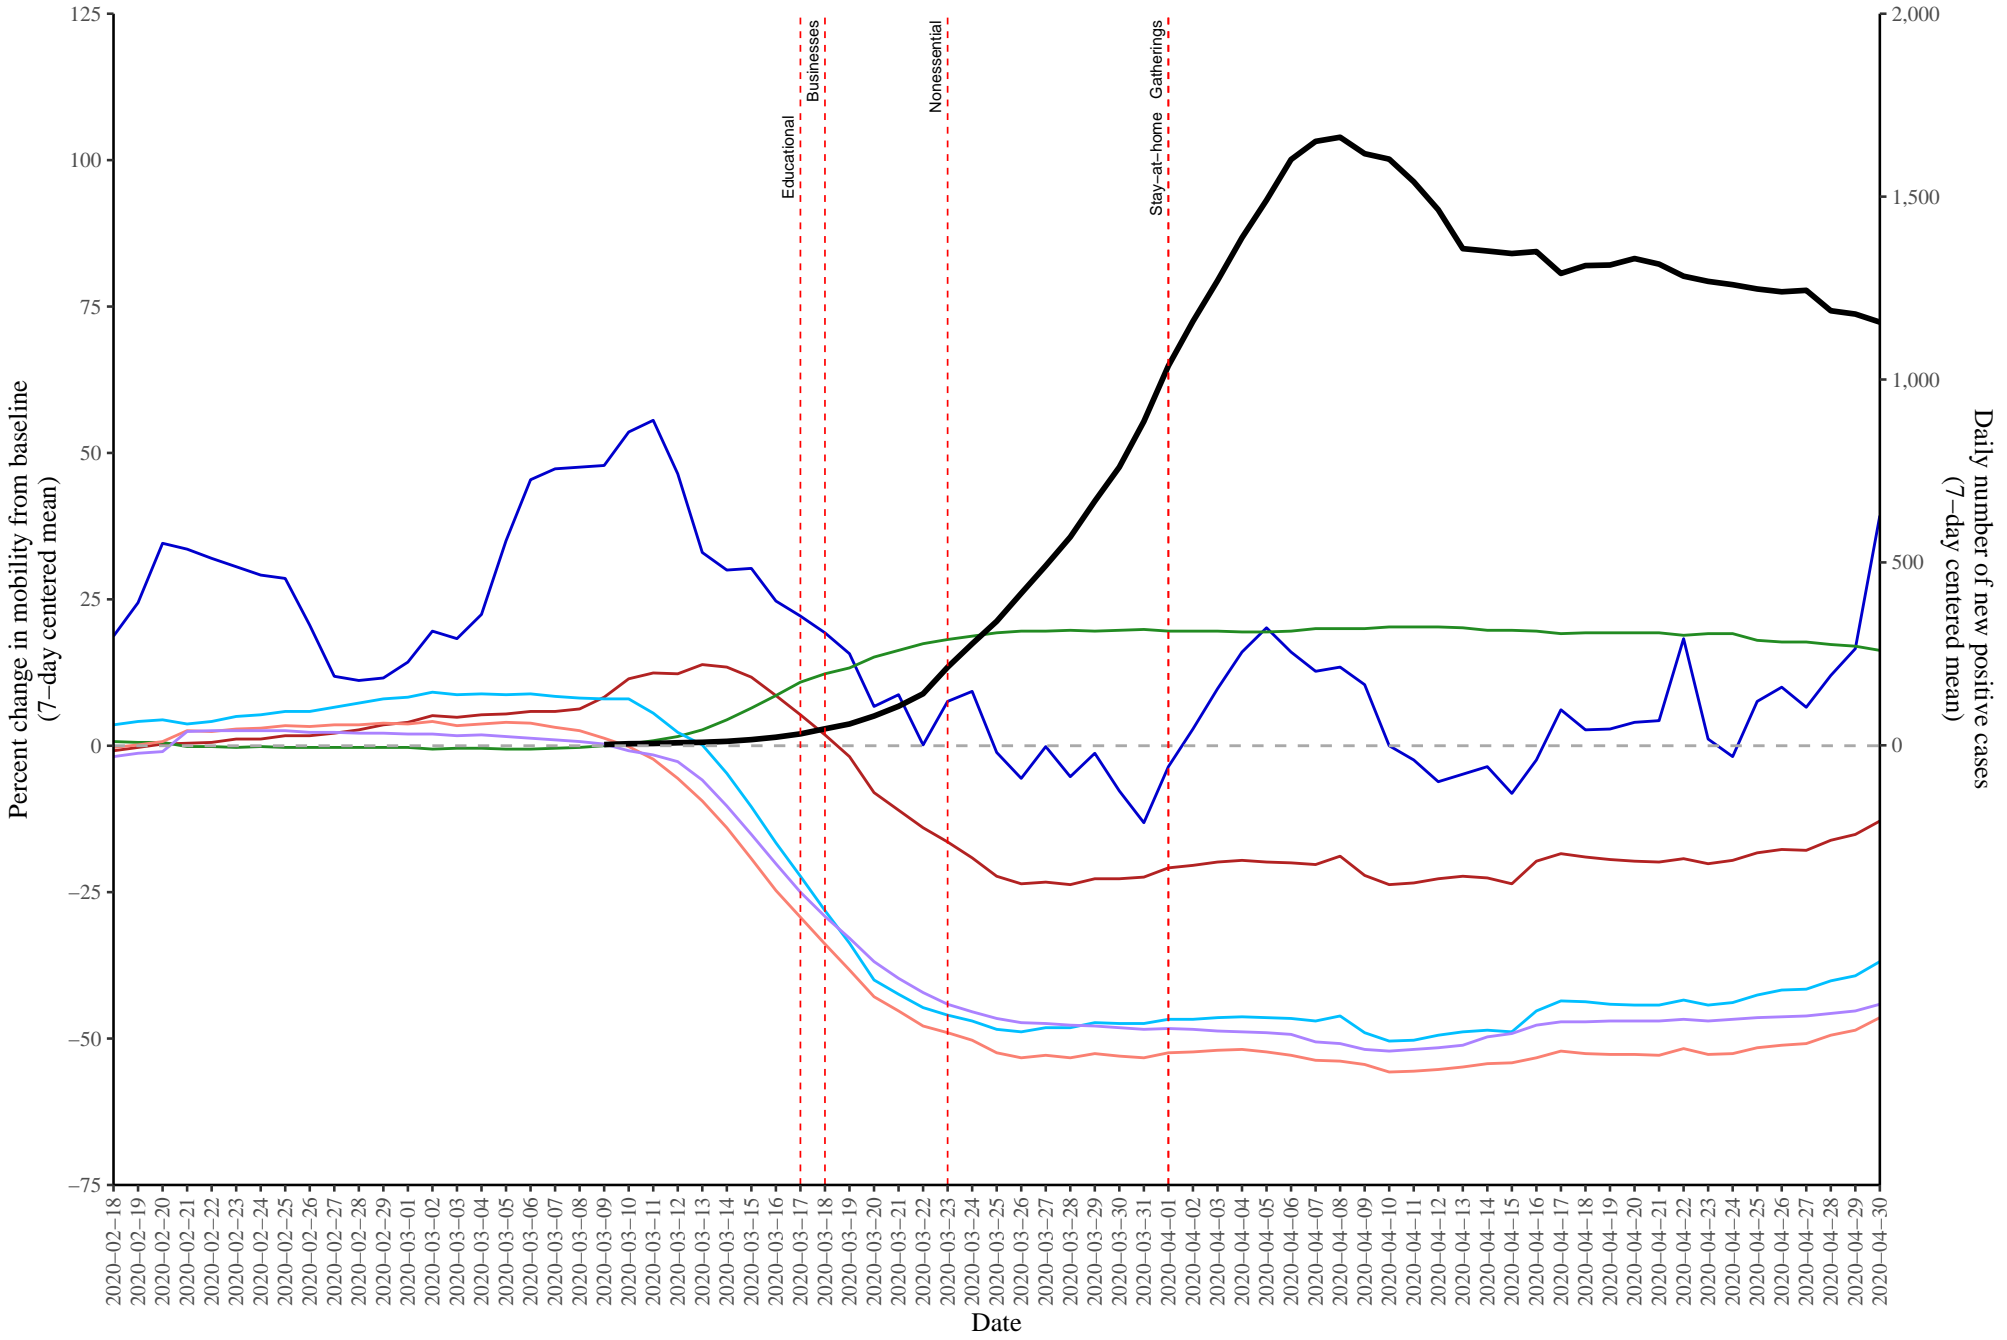

- Parks mobility
- Residential mobility
- Transit stations mobility
- SARS-CoV-2 Cases
- Grocery and pharmacy mobility
- Retail and recreation mobility
- Workplace mobility



# Rhode\_Island

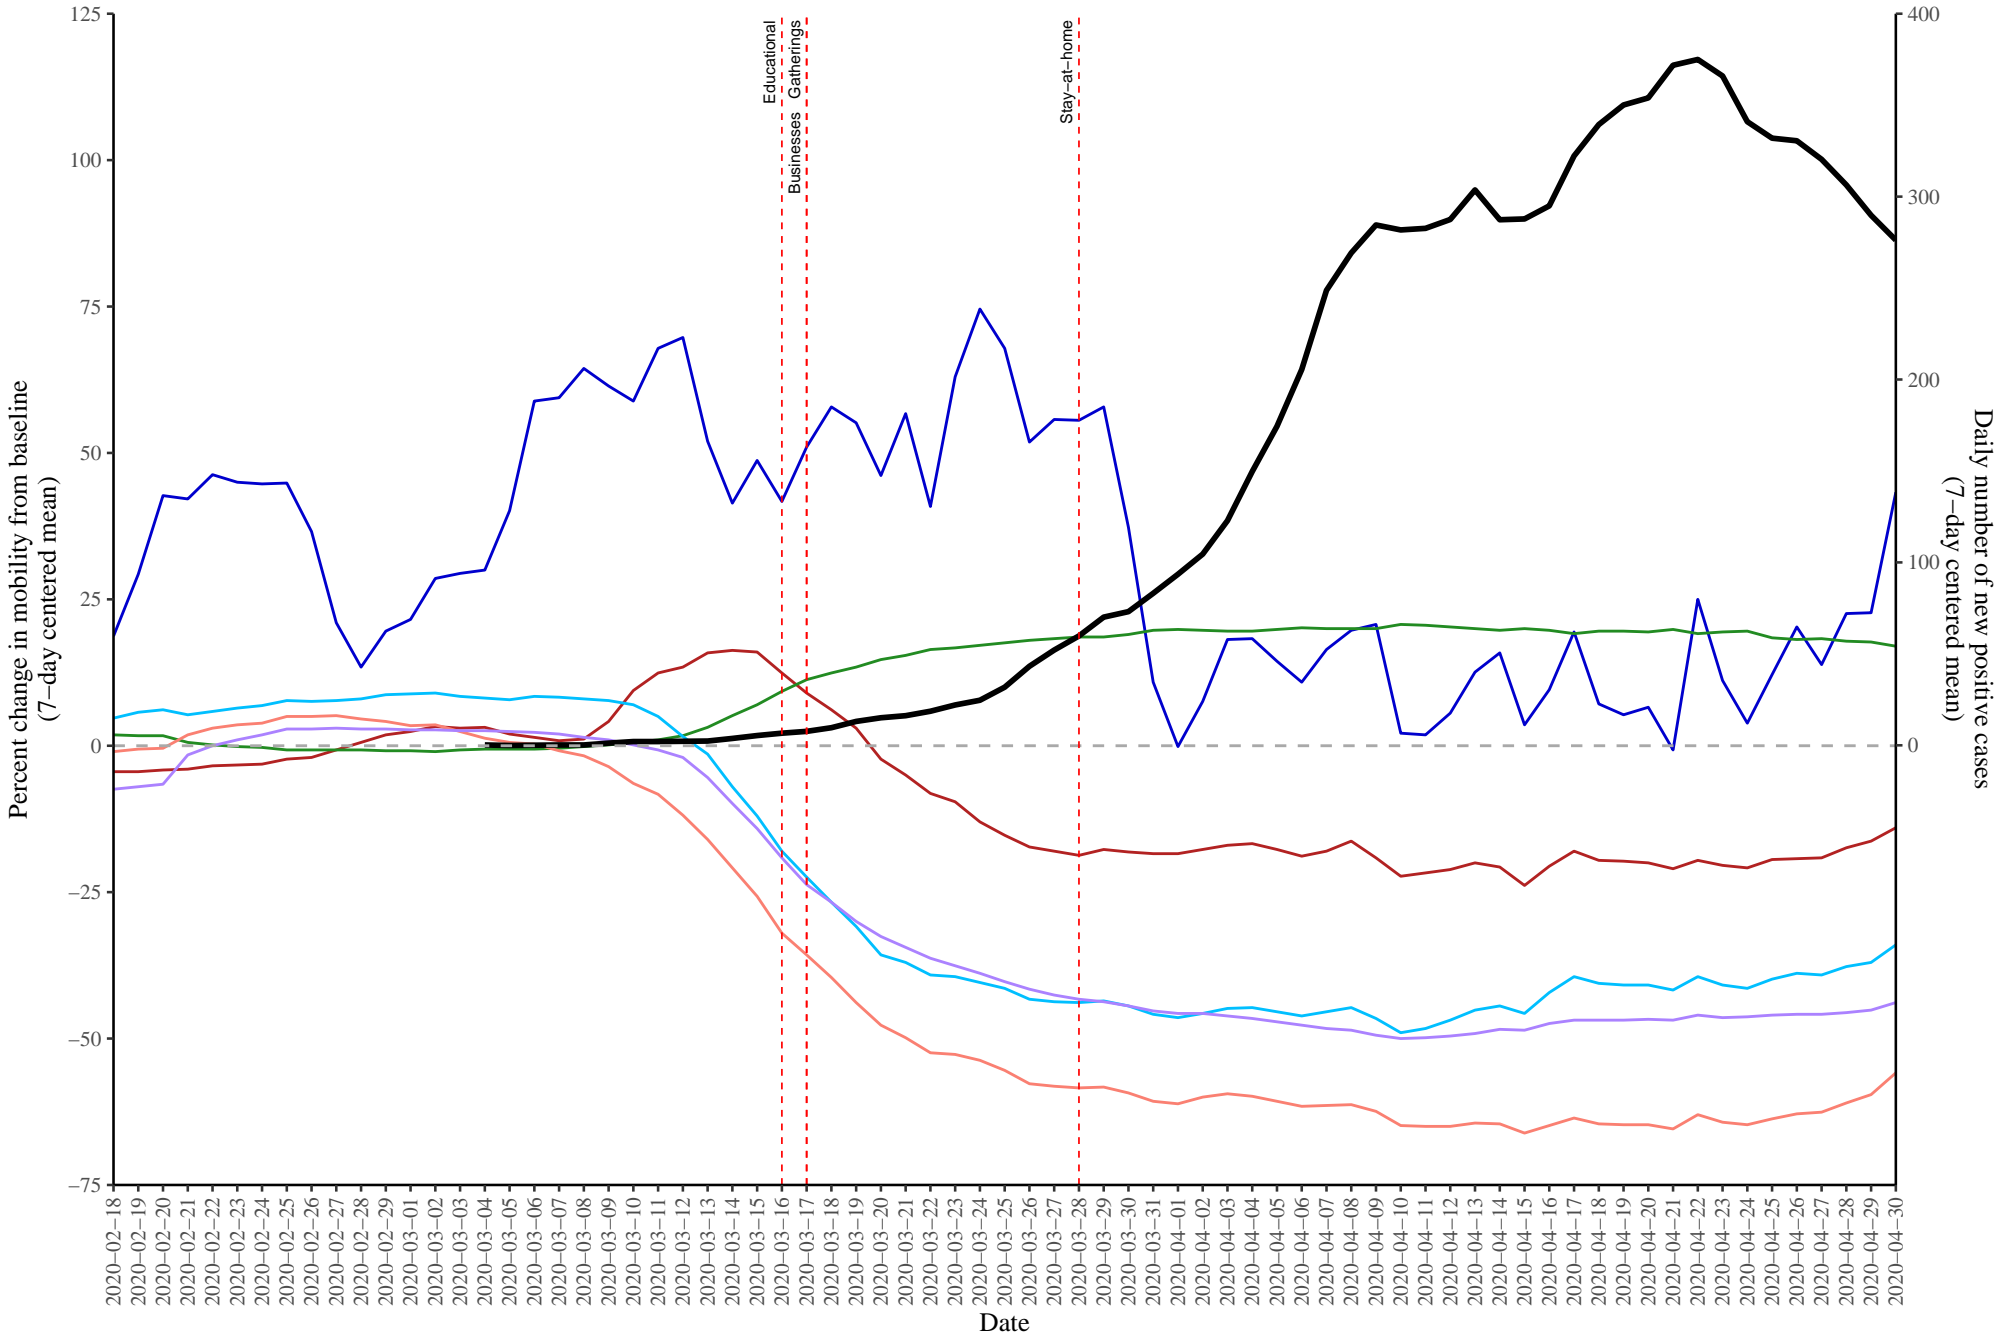

- Parks mobility
- Residential mobility
- Transit stations mobility
- SARS-CoV-2 Cases
- Grocery and pharmacy mobility
- Retail and recreation mobility
- Workplace mobility

# South\_Carolina

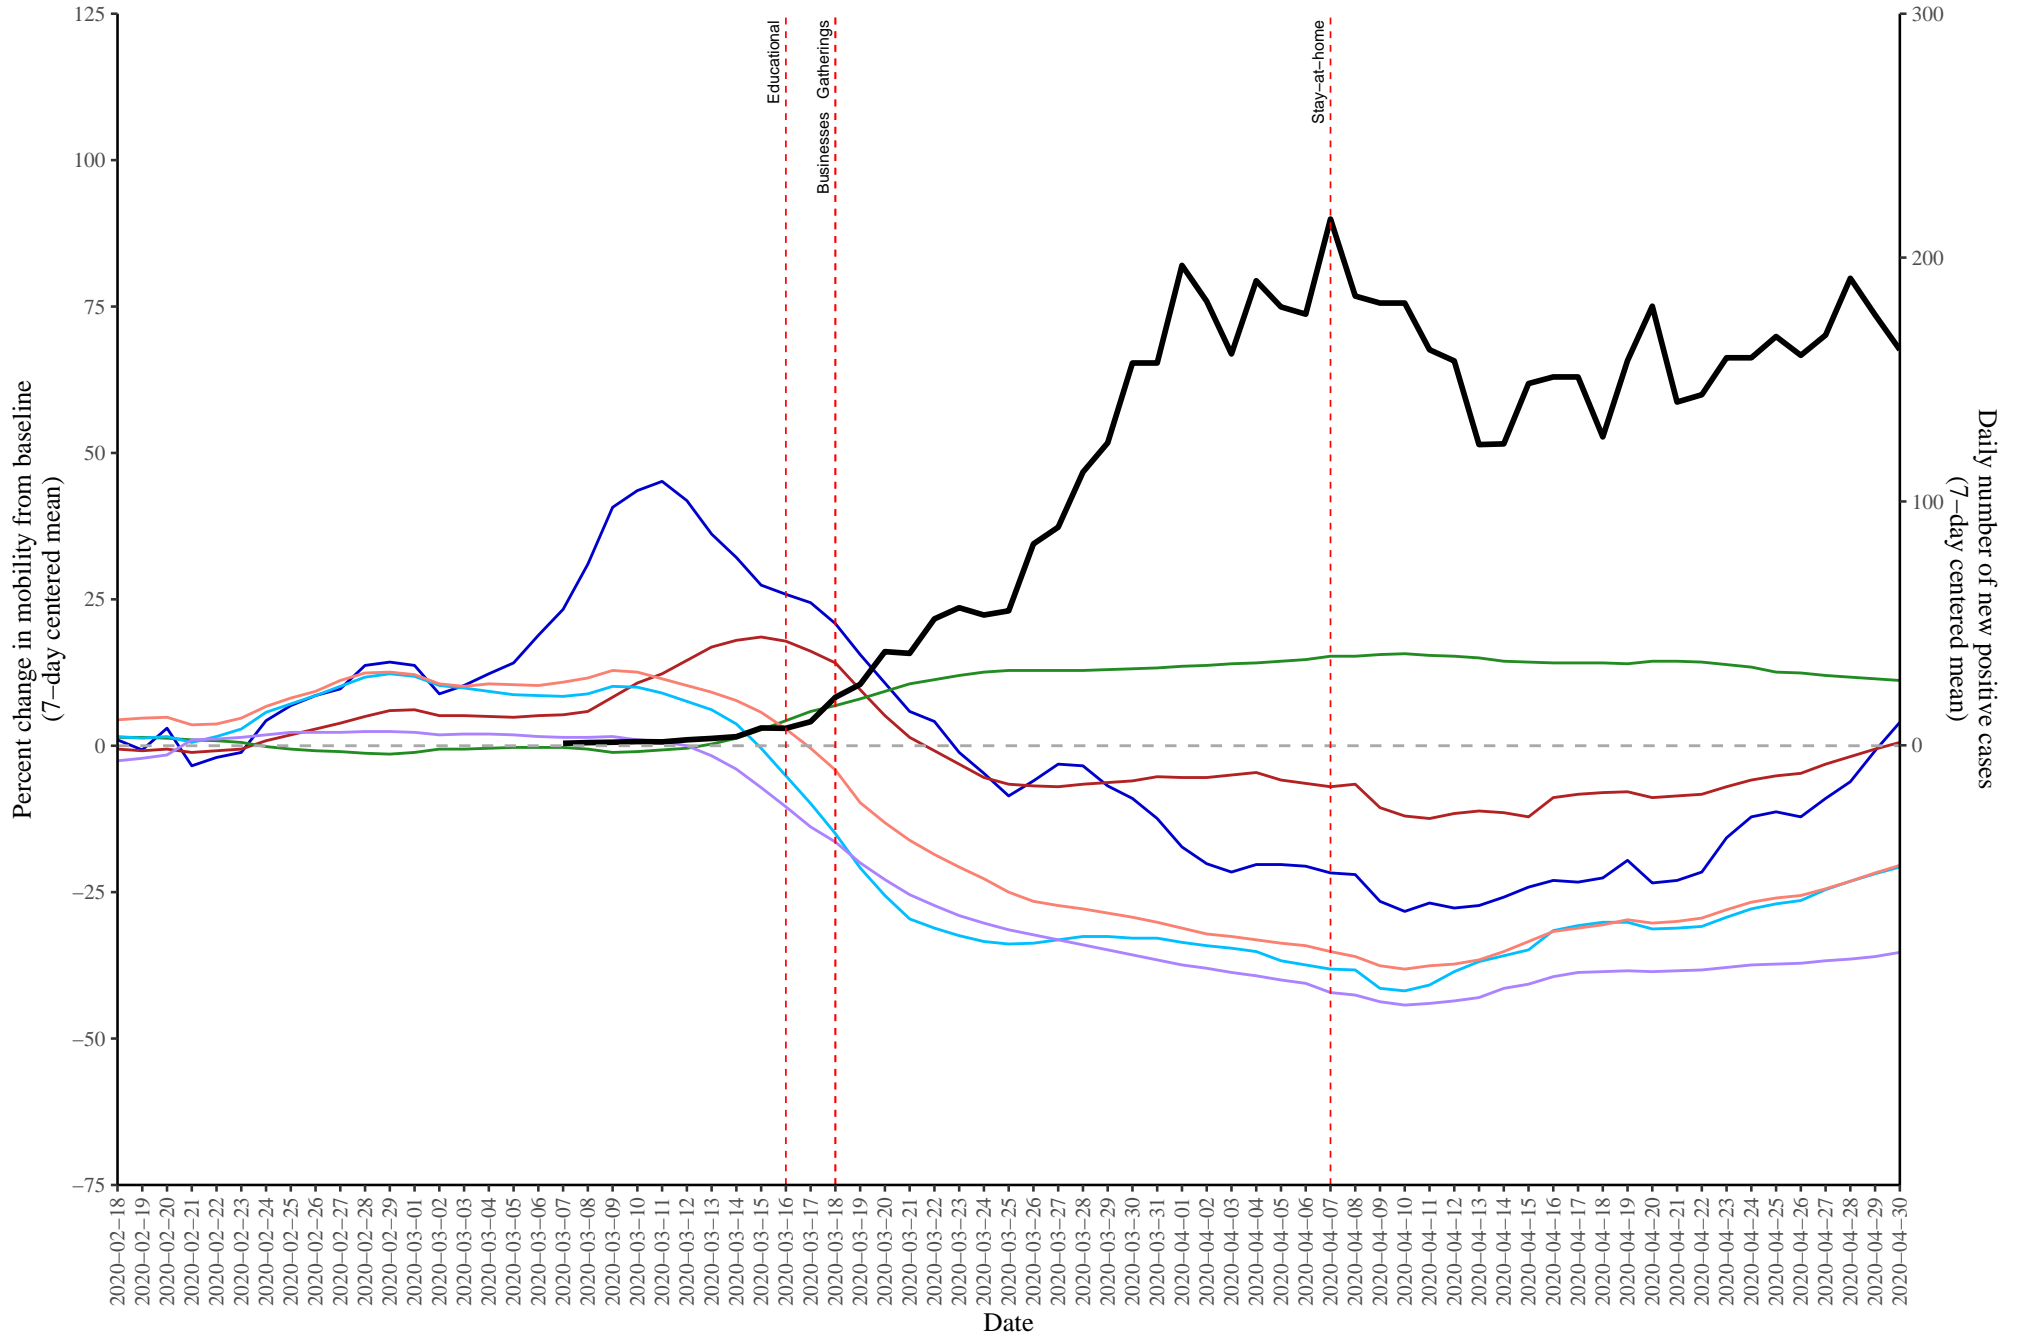

- Parks mobility
- Residential mobility
- Transit stations mobility
- SARS-CoV-2 Cases
- Grocery and pharmacy mobility
- Retail and recreation mobility
- Workplace mobility

# South\_Dakota

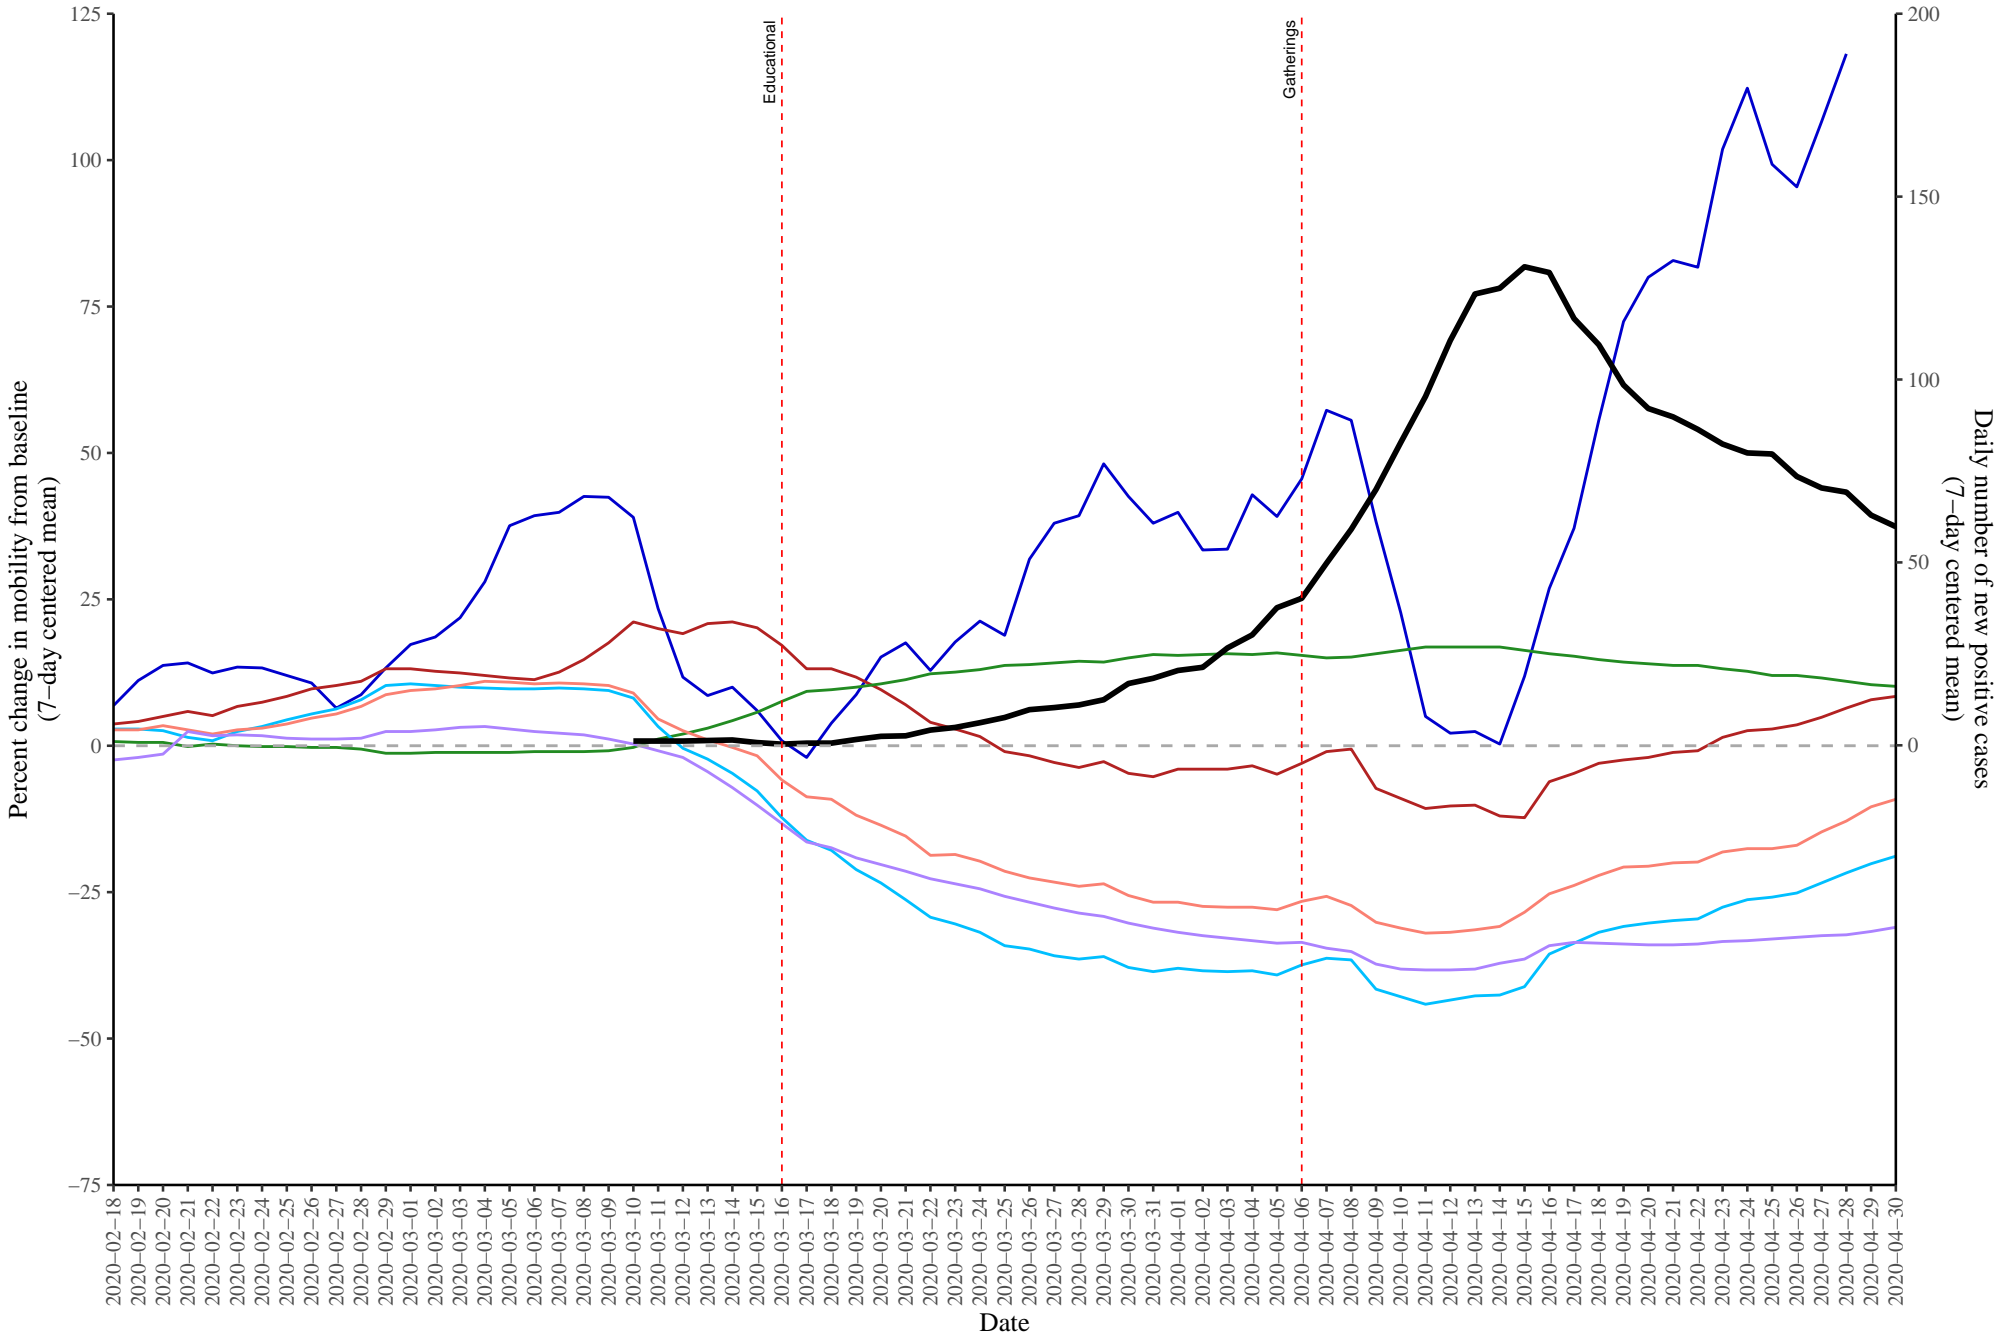

- Parks mobility
- Residential mobility
- Transit stations mobility
- SARS-CoV-2 Cases
- Grocery and pharmacy mobility
- Retail and recreation mobility
- Workplace mobility

# Tennessee

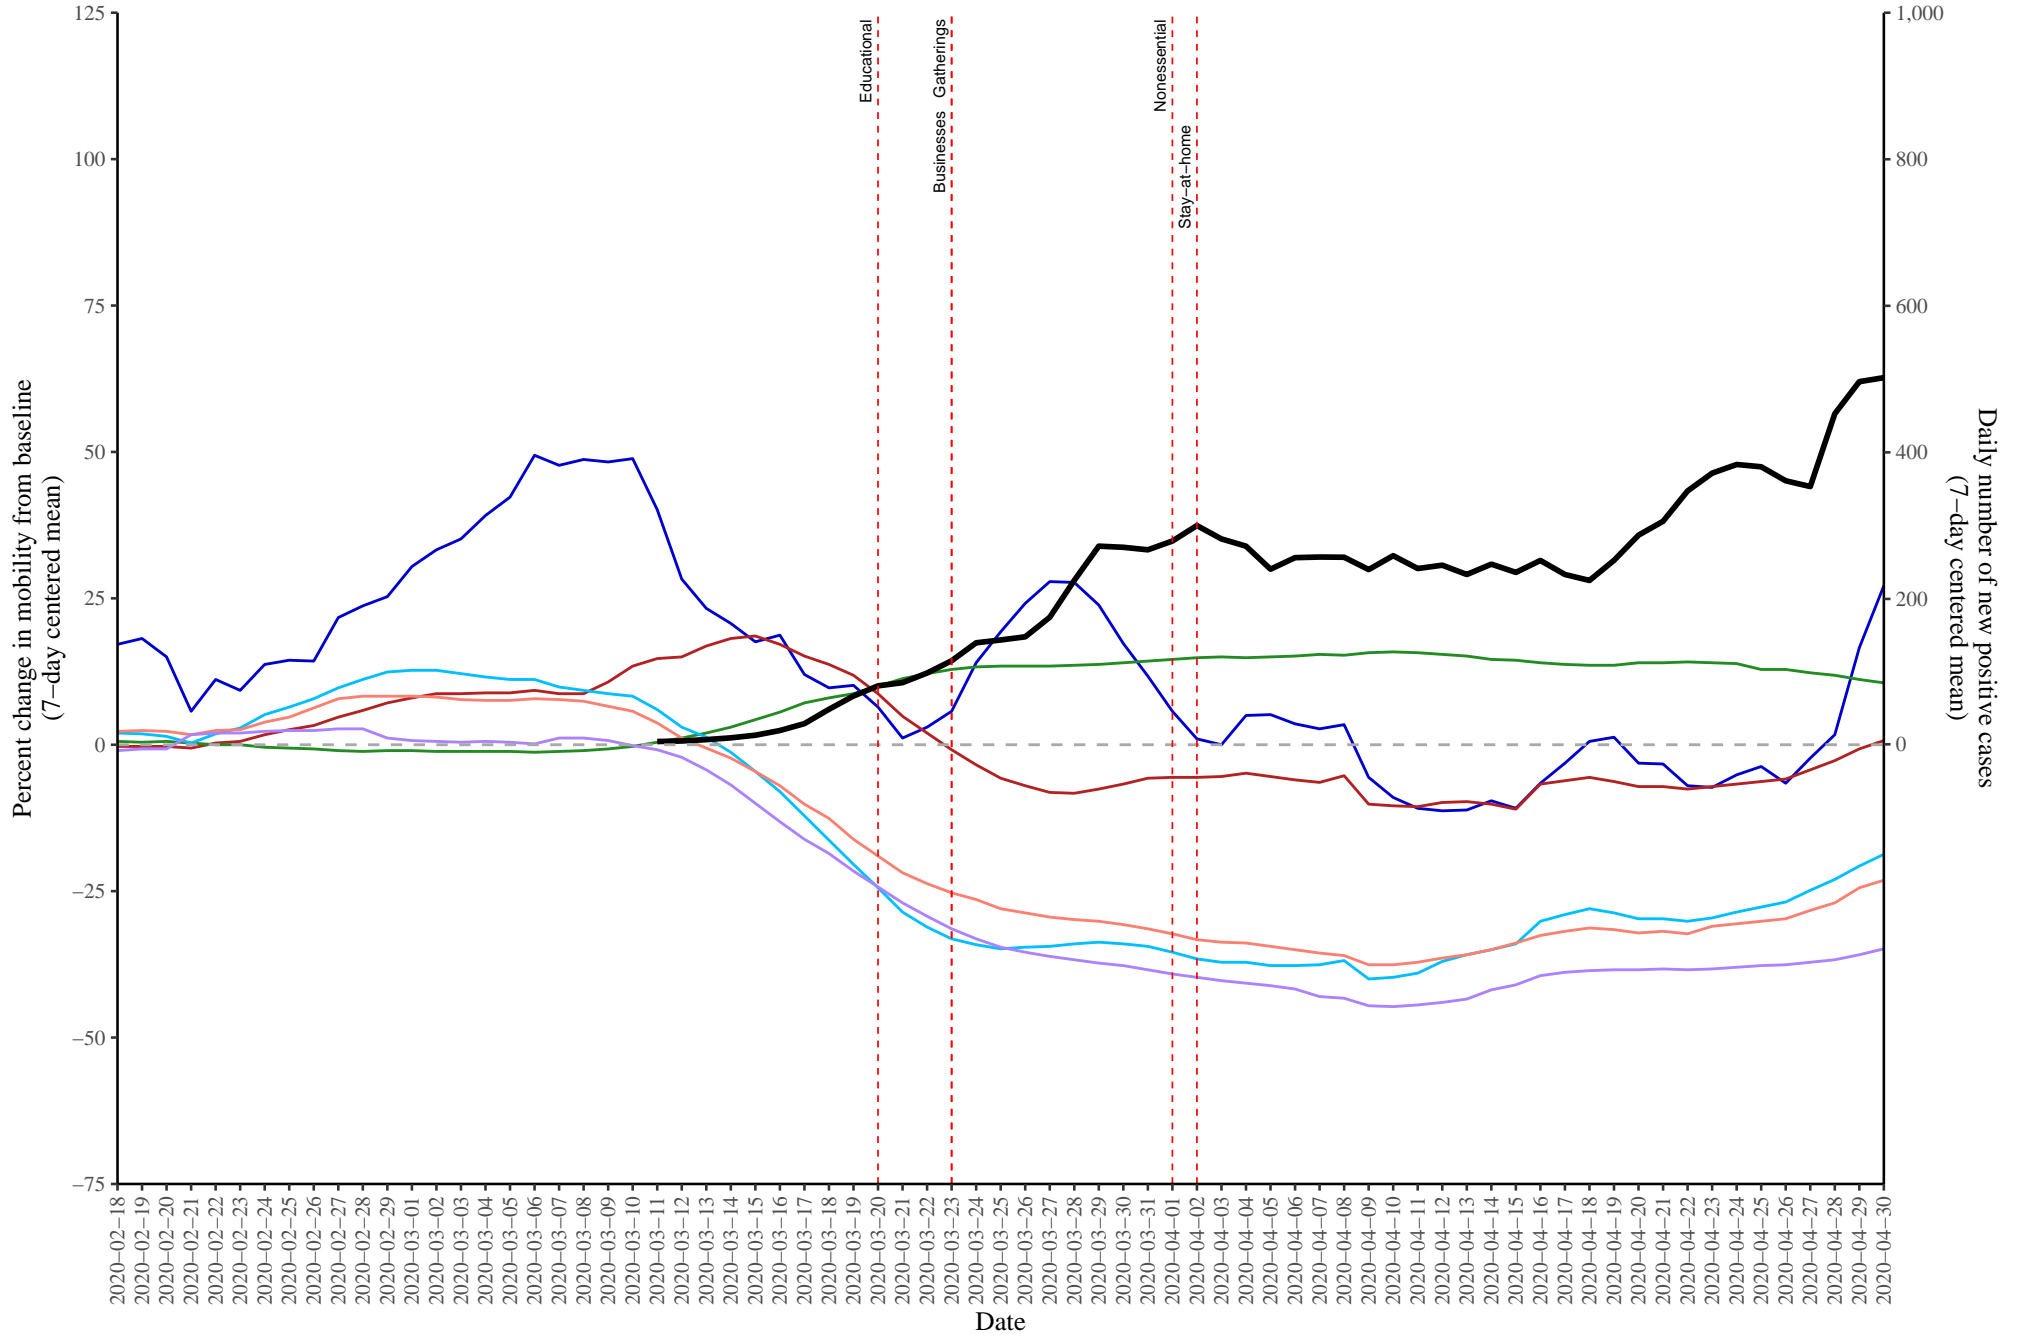

- Parks mobility
- Residential mobility
- Transit stations mobility
- SARS-CoV-2 Cases
- Grocery and pharmacy mobility
- Retail and recreation mobility
- Workplace mobility

# Texas

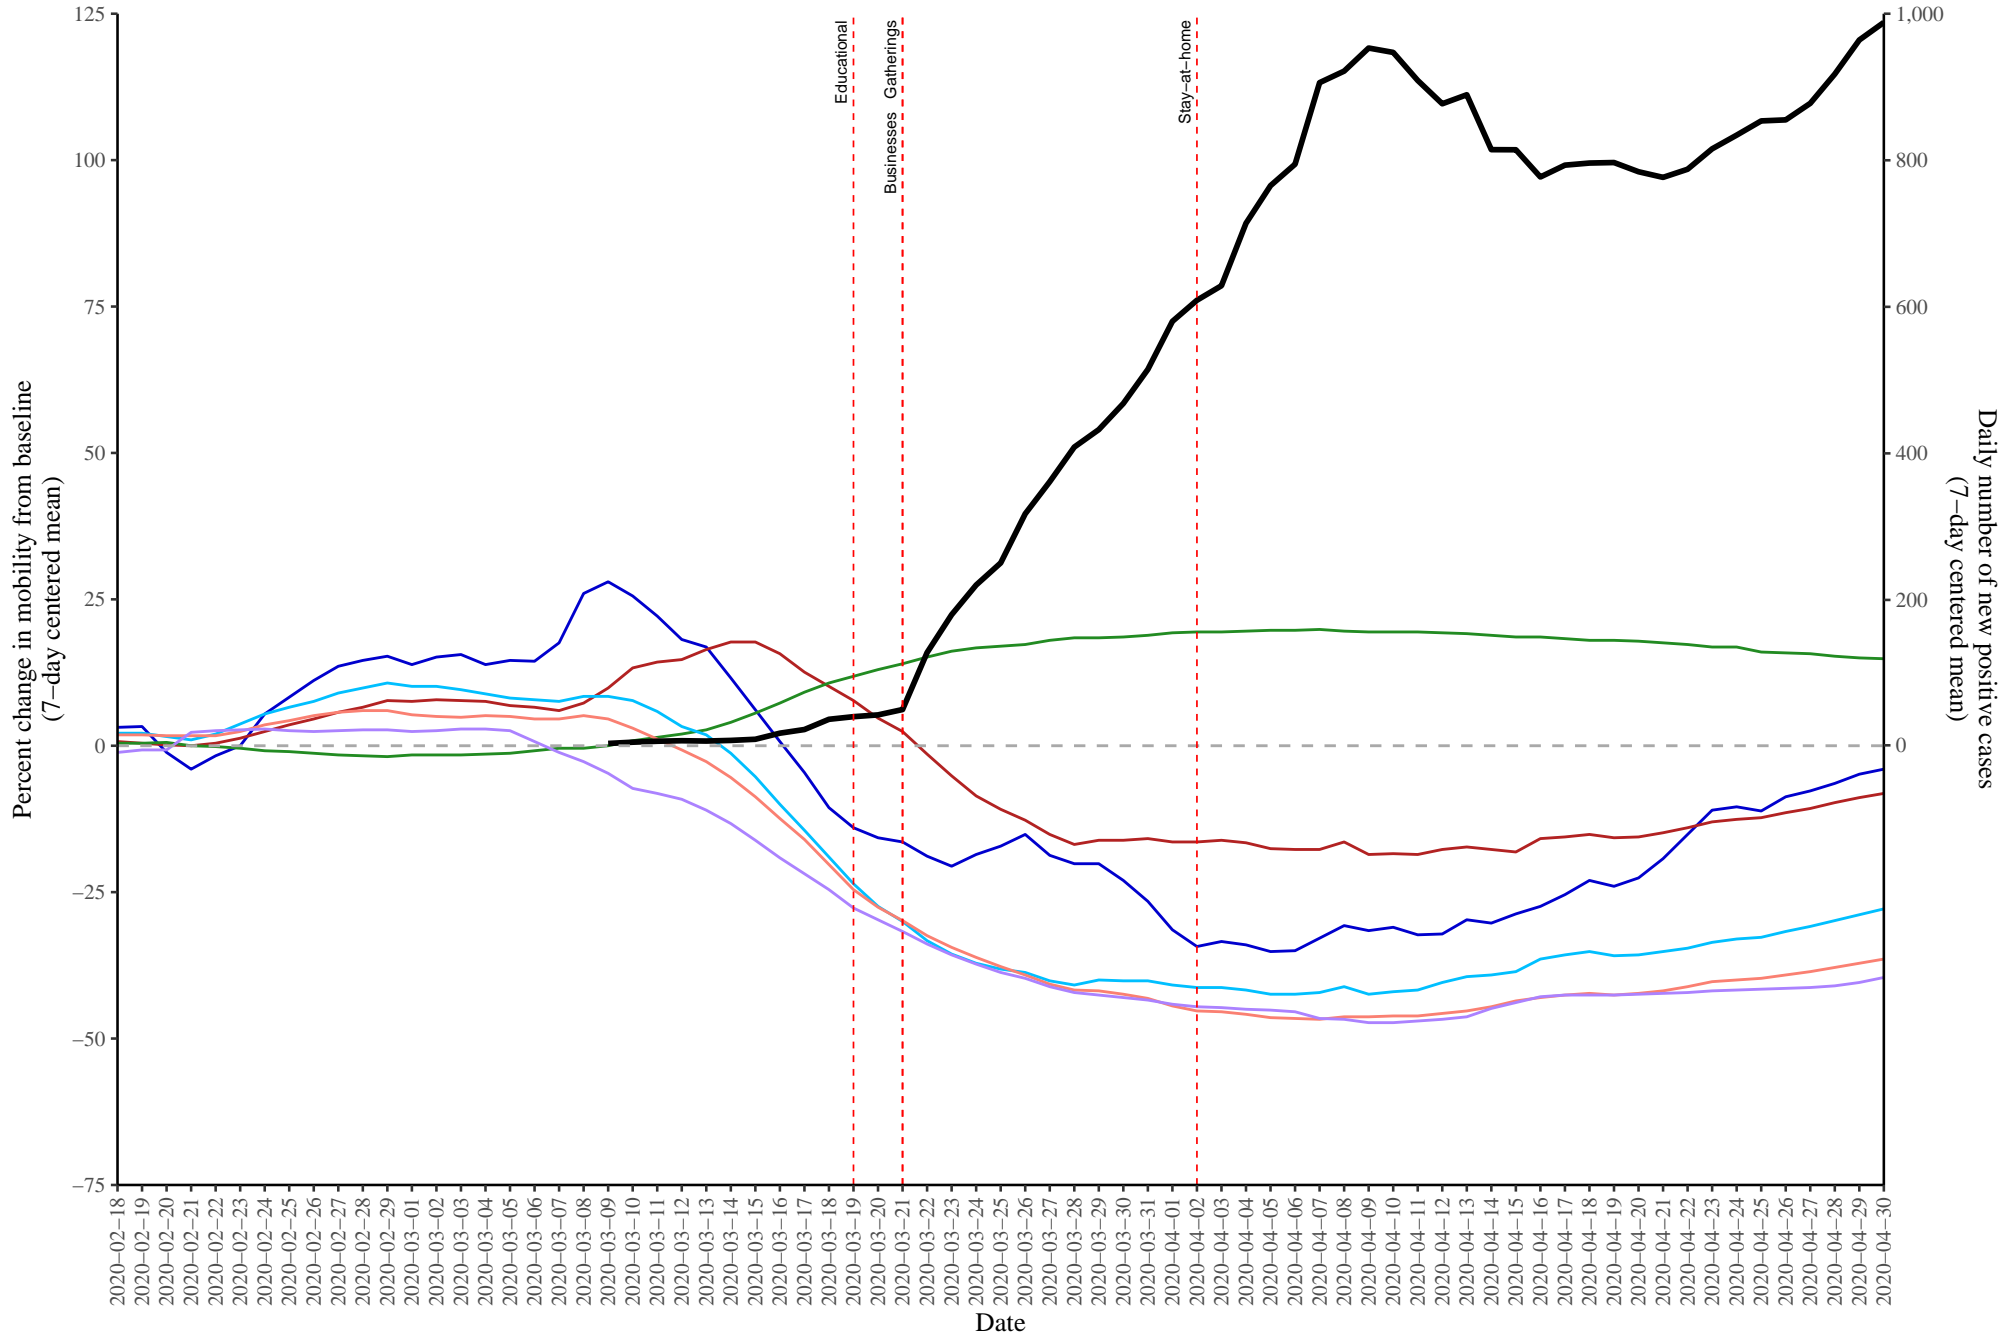

- Parks mobility
- Residential mobility
- Transit stations mobility
- SARS-CoV-2 Cases
- Grocery and pharmacy mobility
- Retail and recreation mobility
- Workplace mobility

# Utah

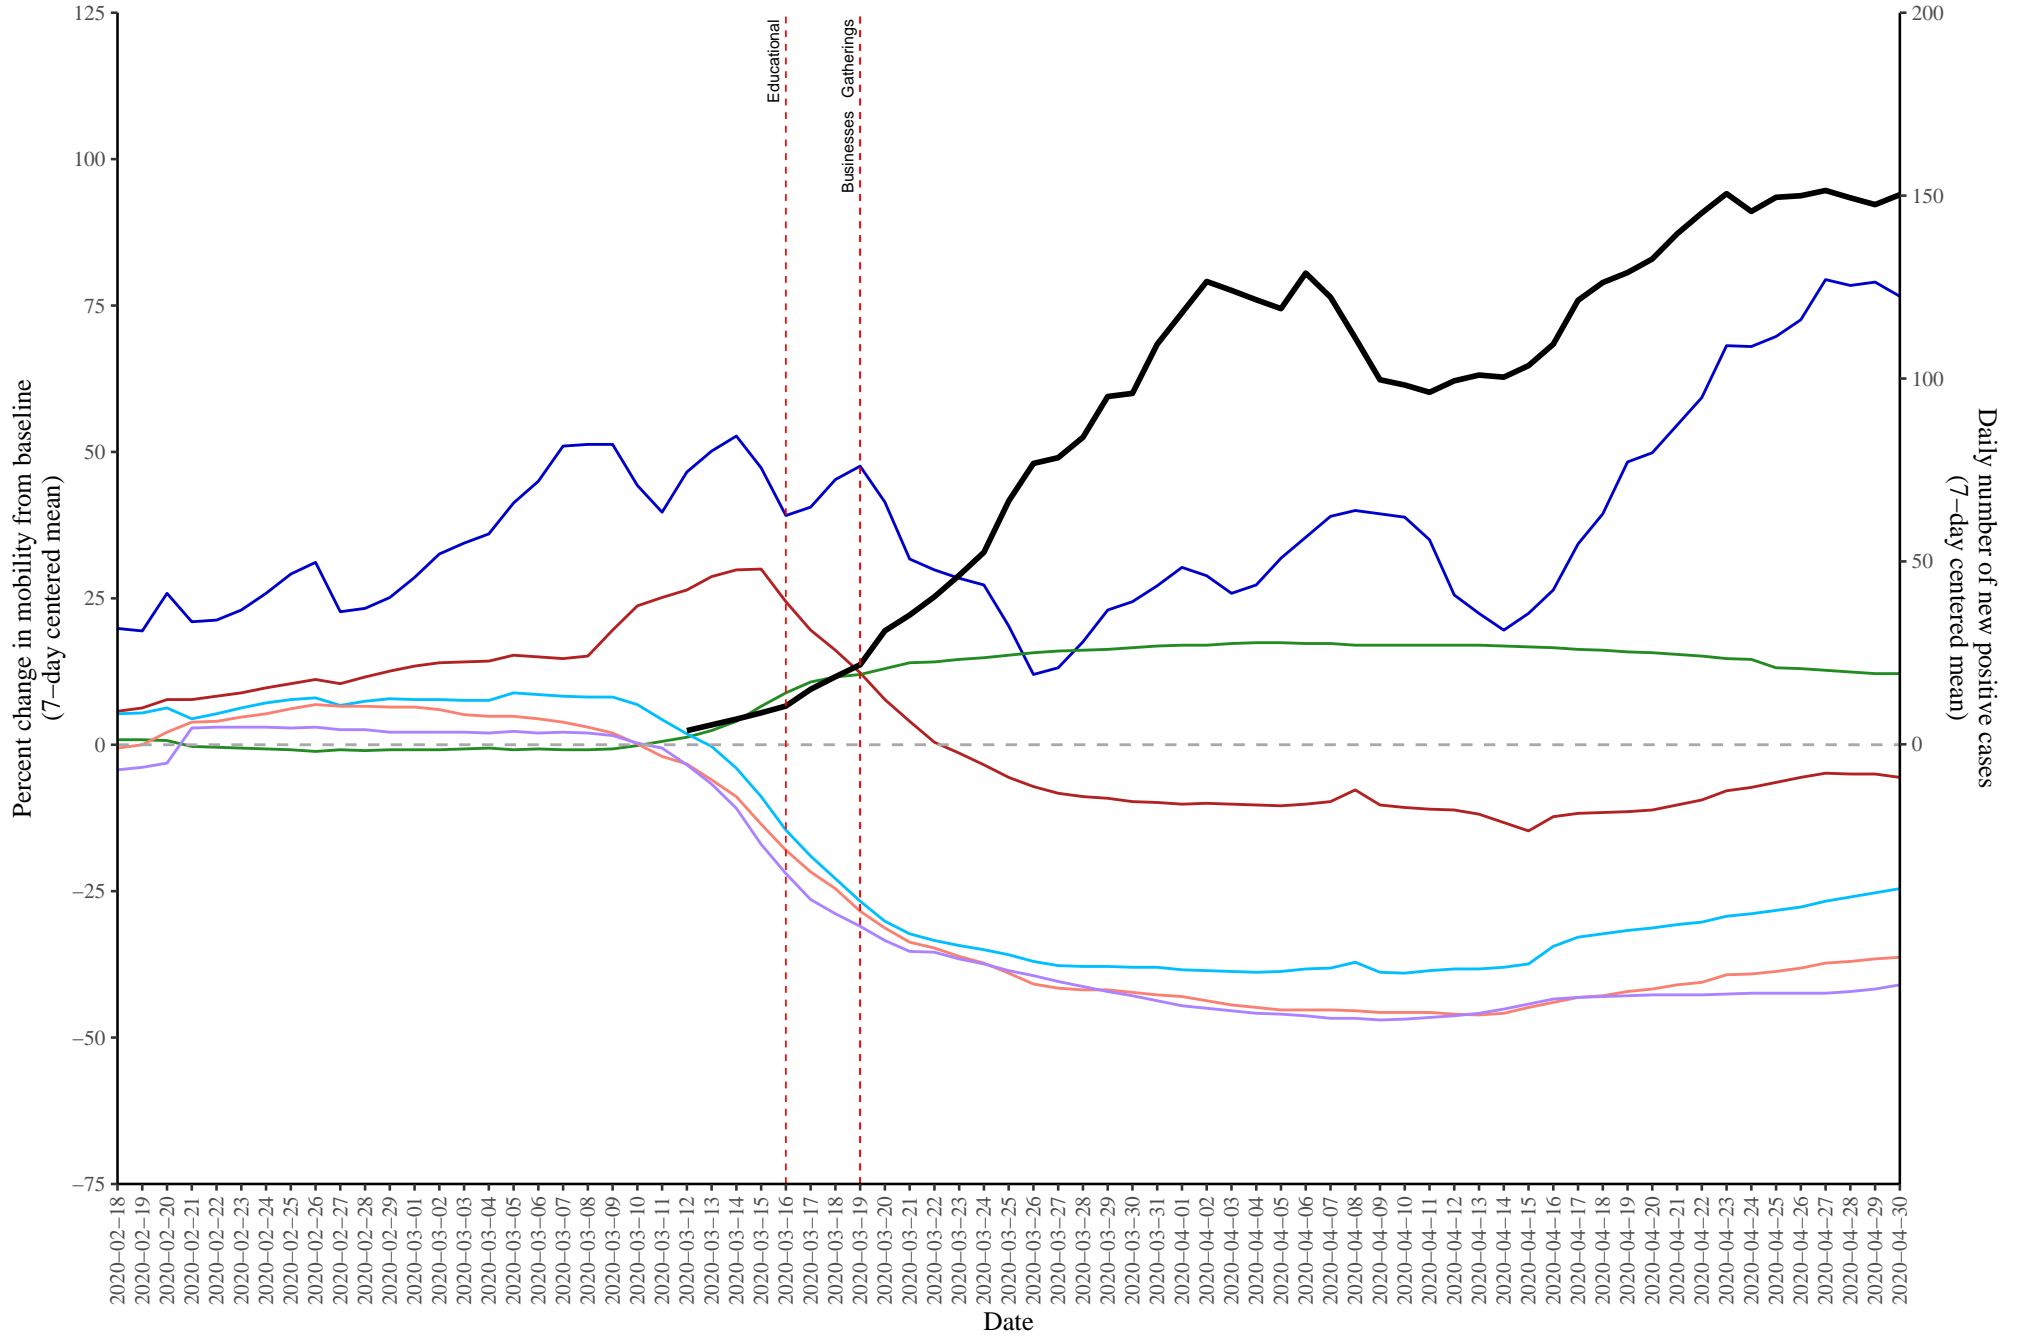

- Parks mobility
- Residential mobility
- Transit stations mobility
- SARS-CoV-2 Cases
- Grocery and pharmacy mobility
- Retail and recreation mobility
- Workplace mobility

# Vermont

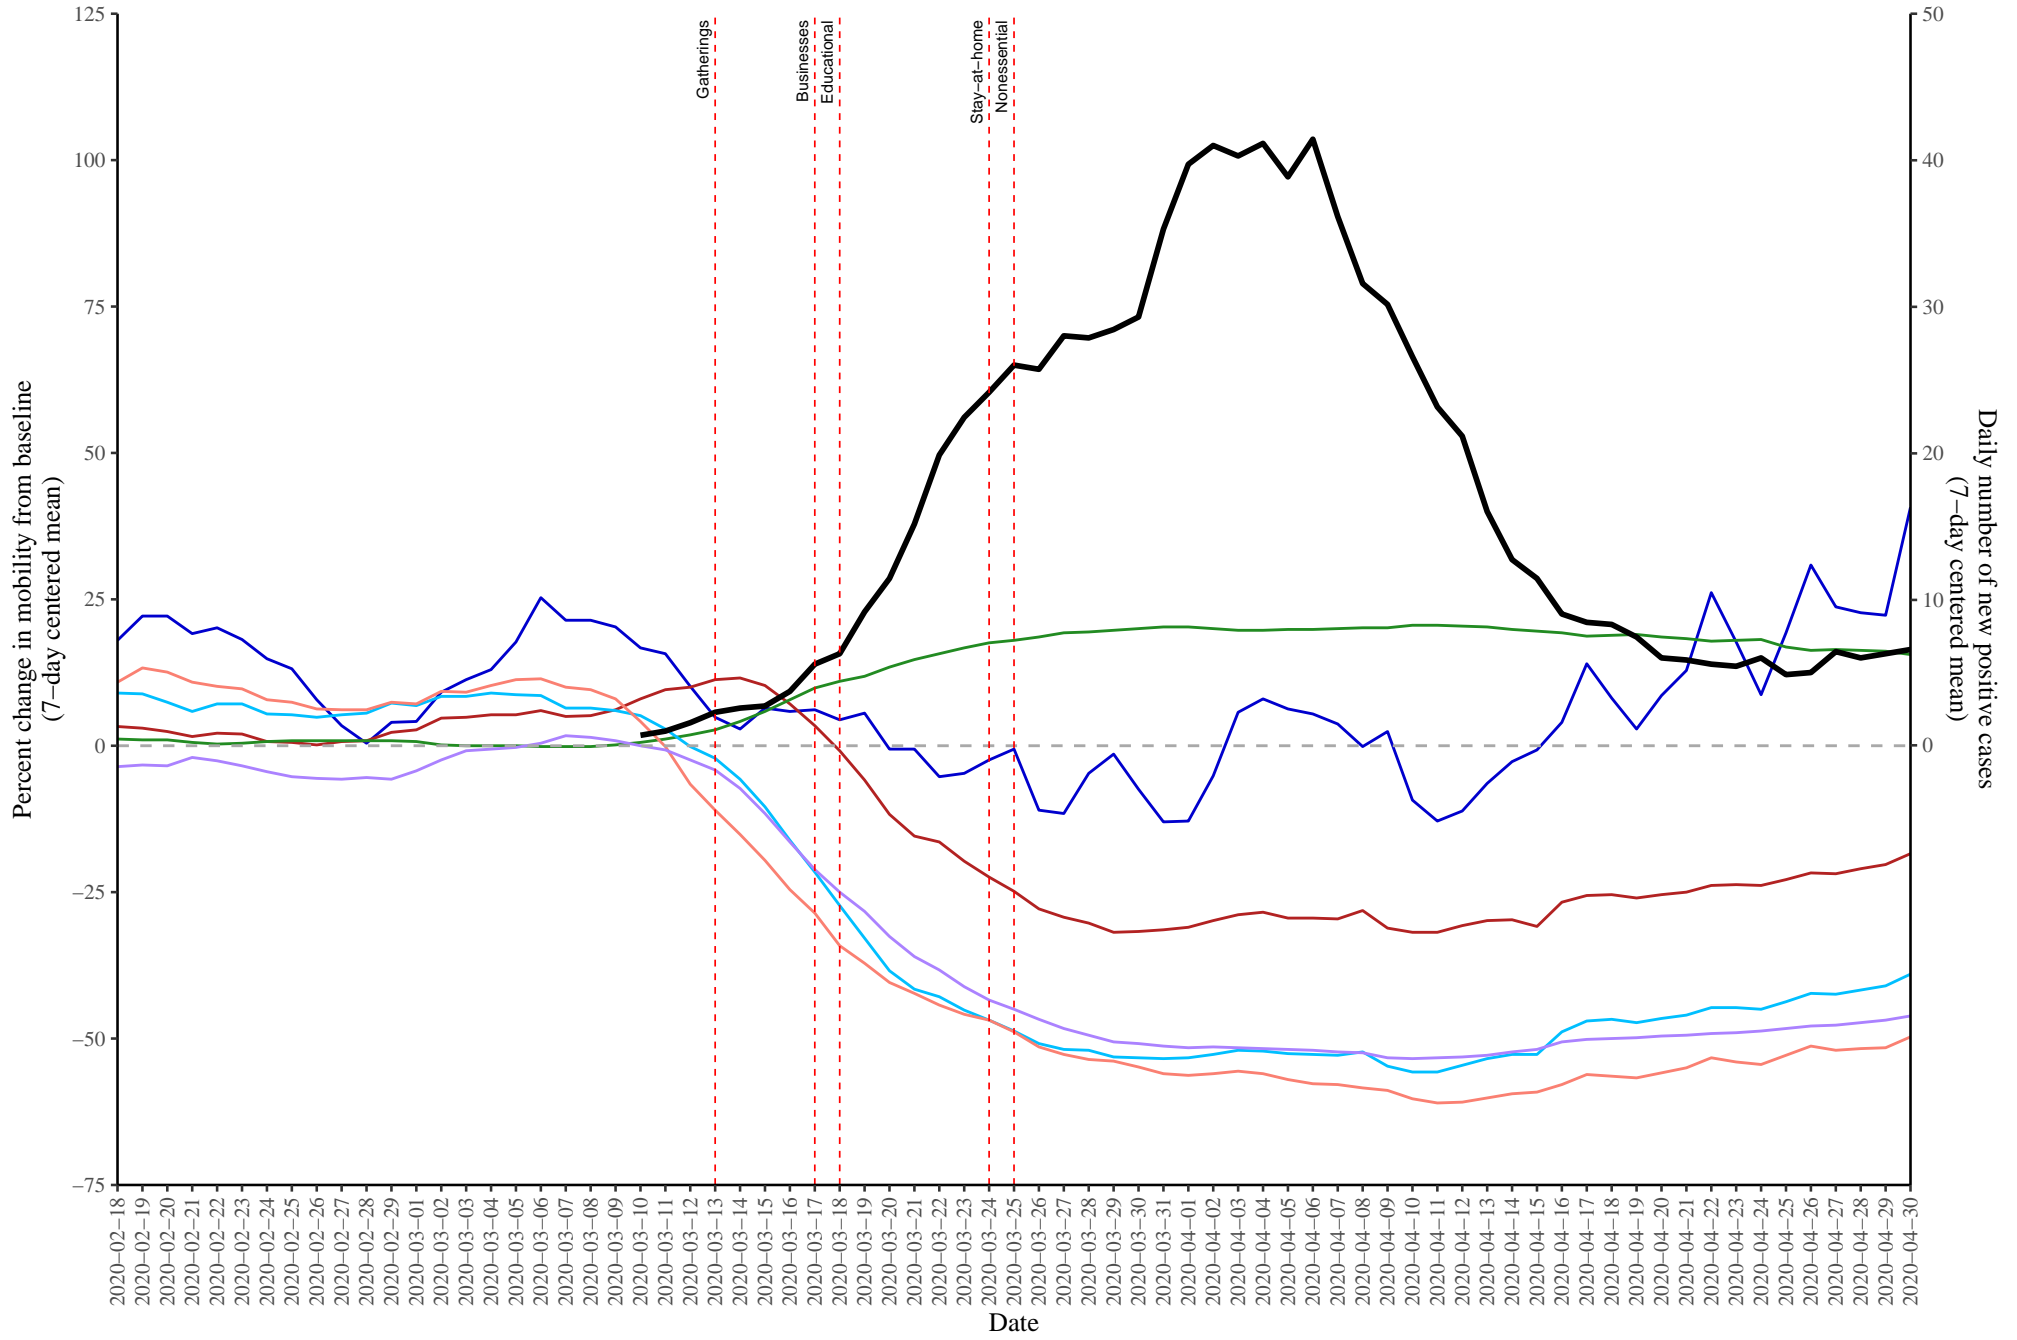

- Parks mobility
- Residential mobility
- Transit stations mobility
- SARS-CoV-2 Cases
- Grocery and pharmacy mobility
- Retail and recreation mobility
- Workplace mobility

# Virginia

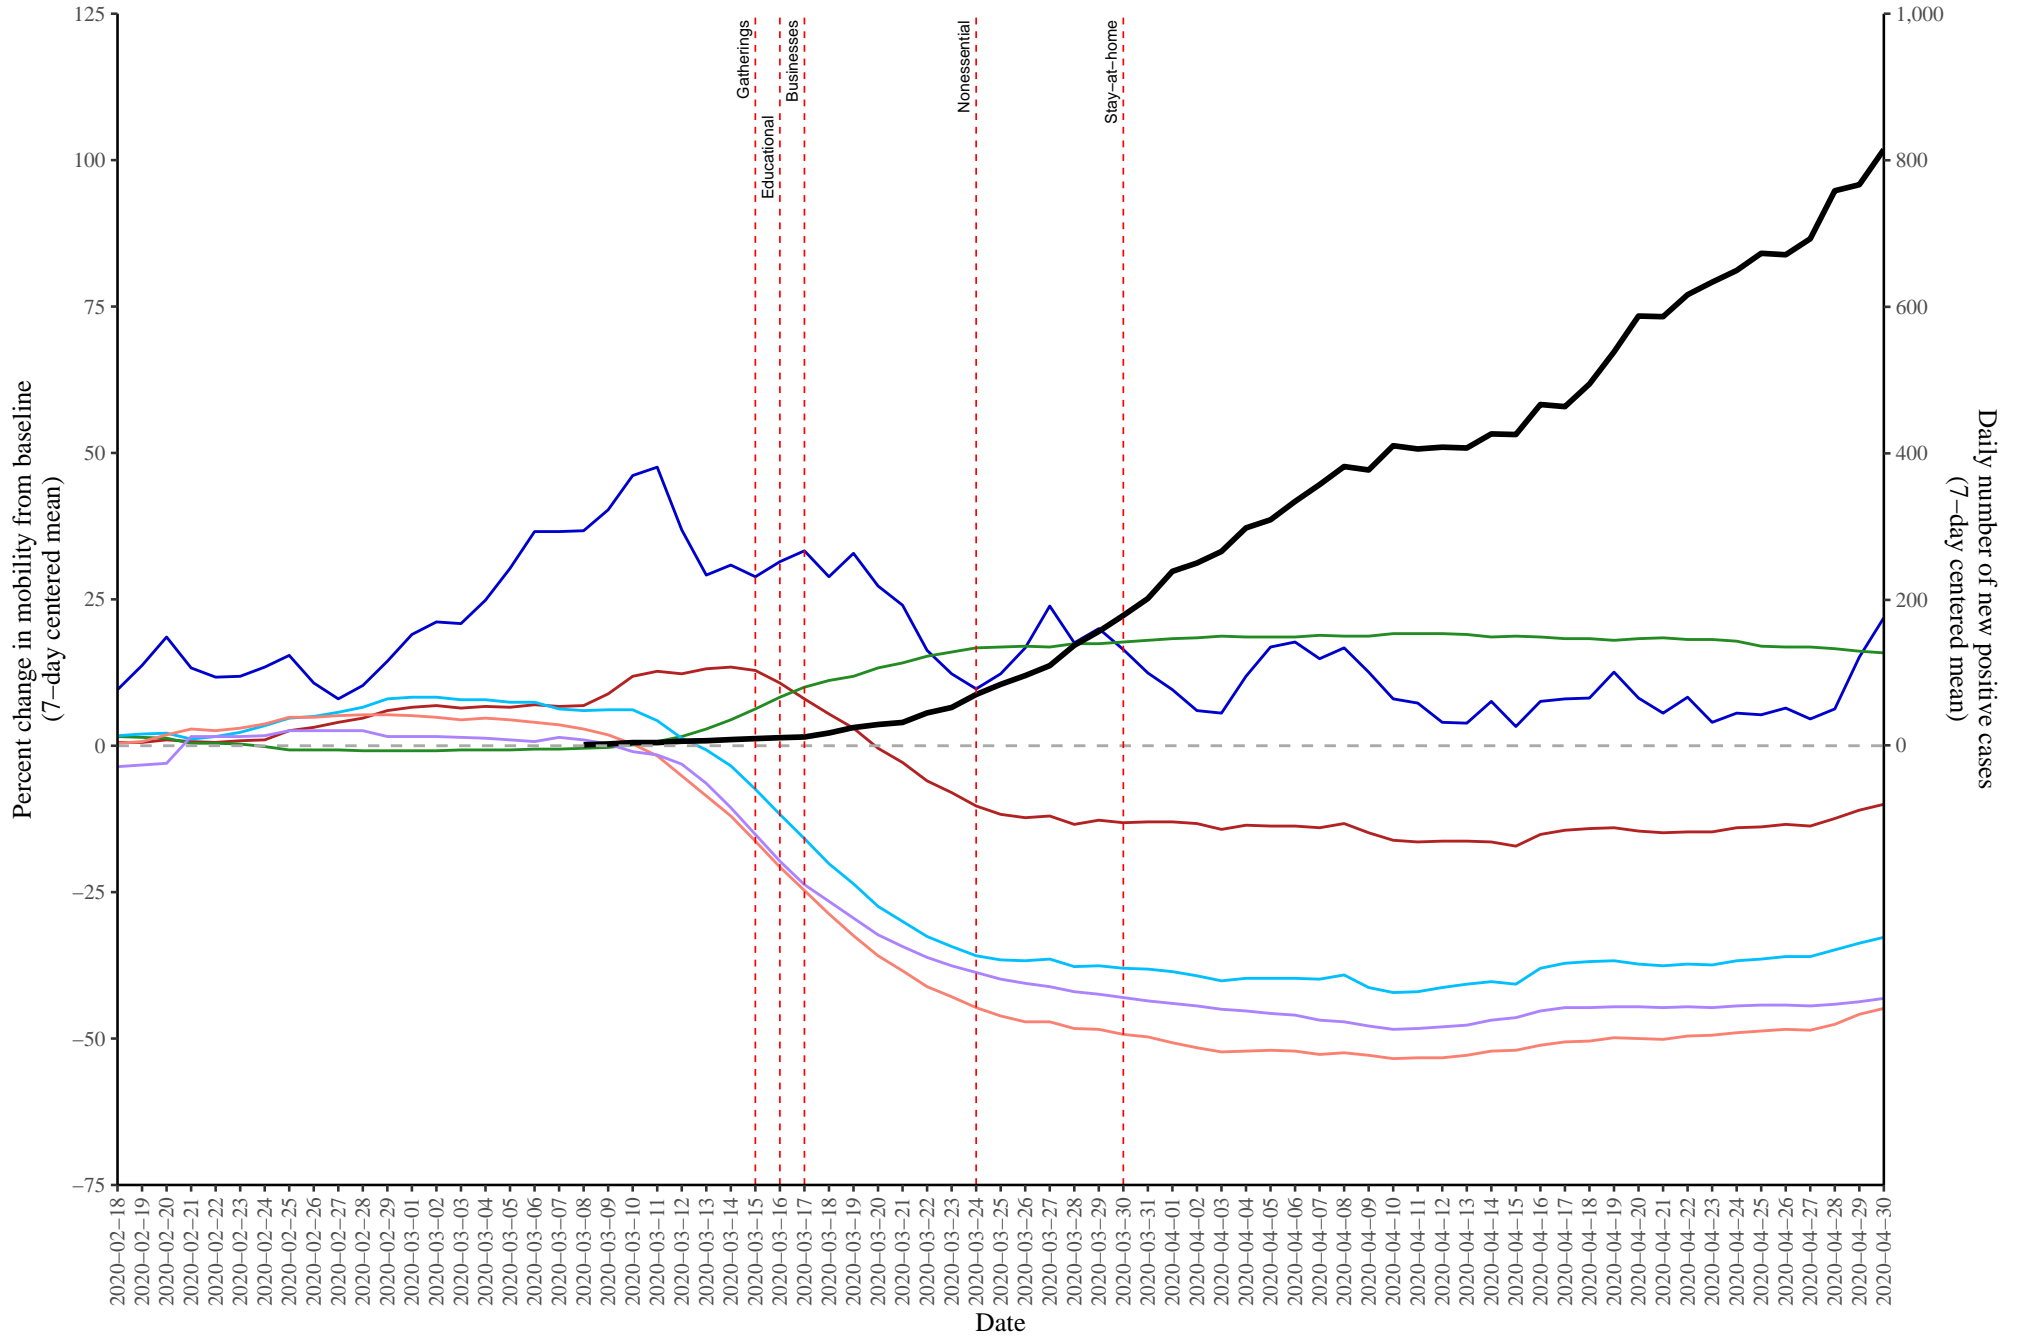

- Parks mobility
- Residential mobility
- Transit stations mobility
- SARS-CoV-2 Cases
- Grocery and pharmacy mobility
- Retail and recreation mobility
- Workplace mobility



# Washington

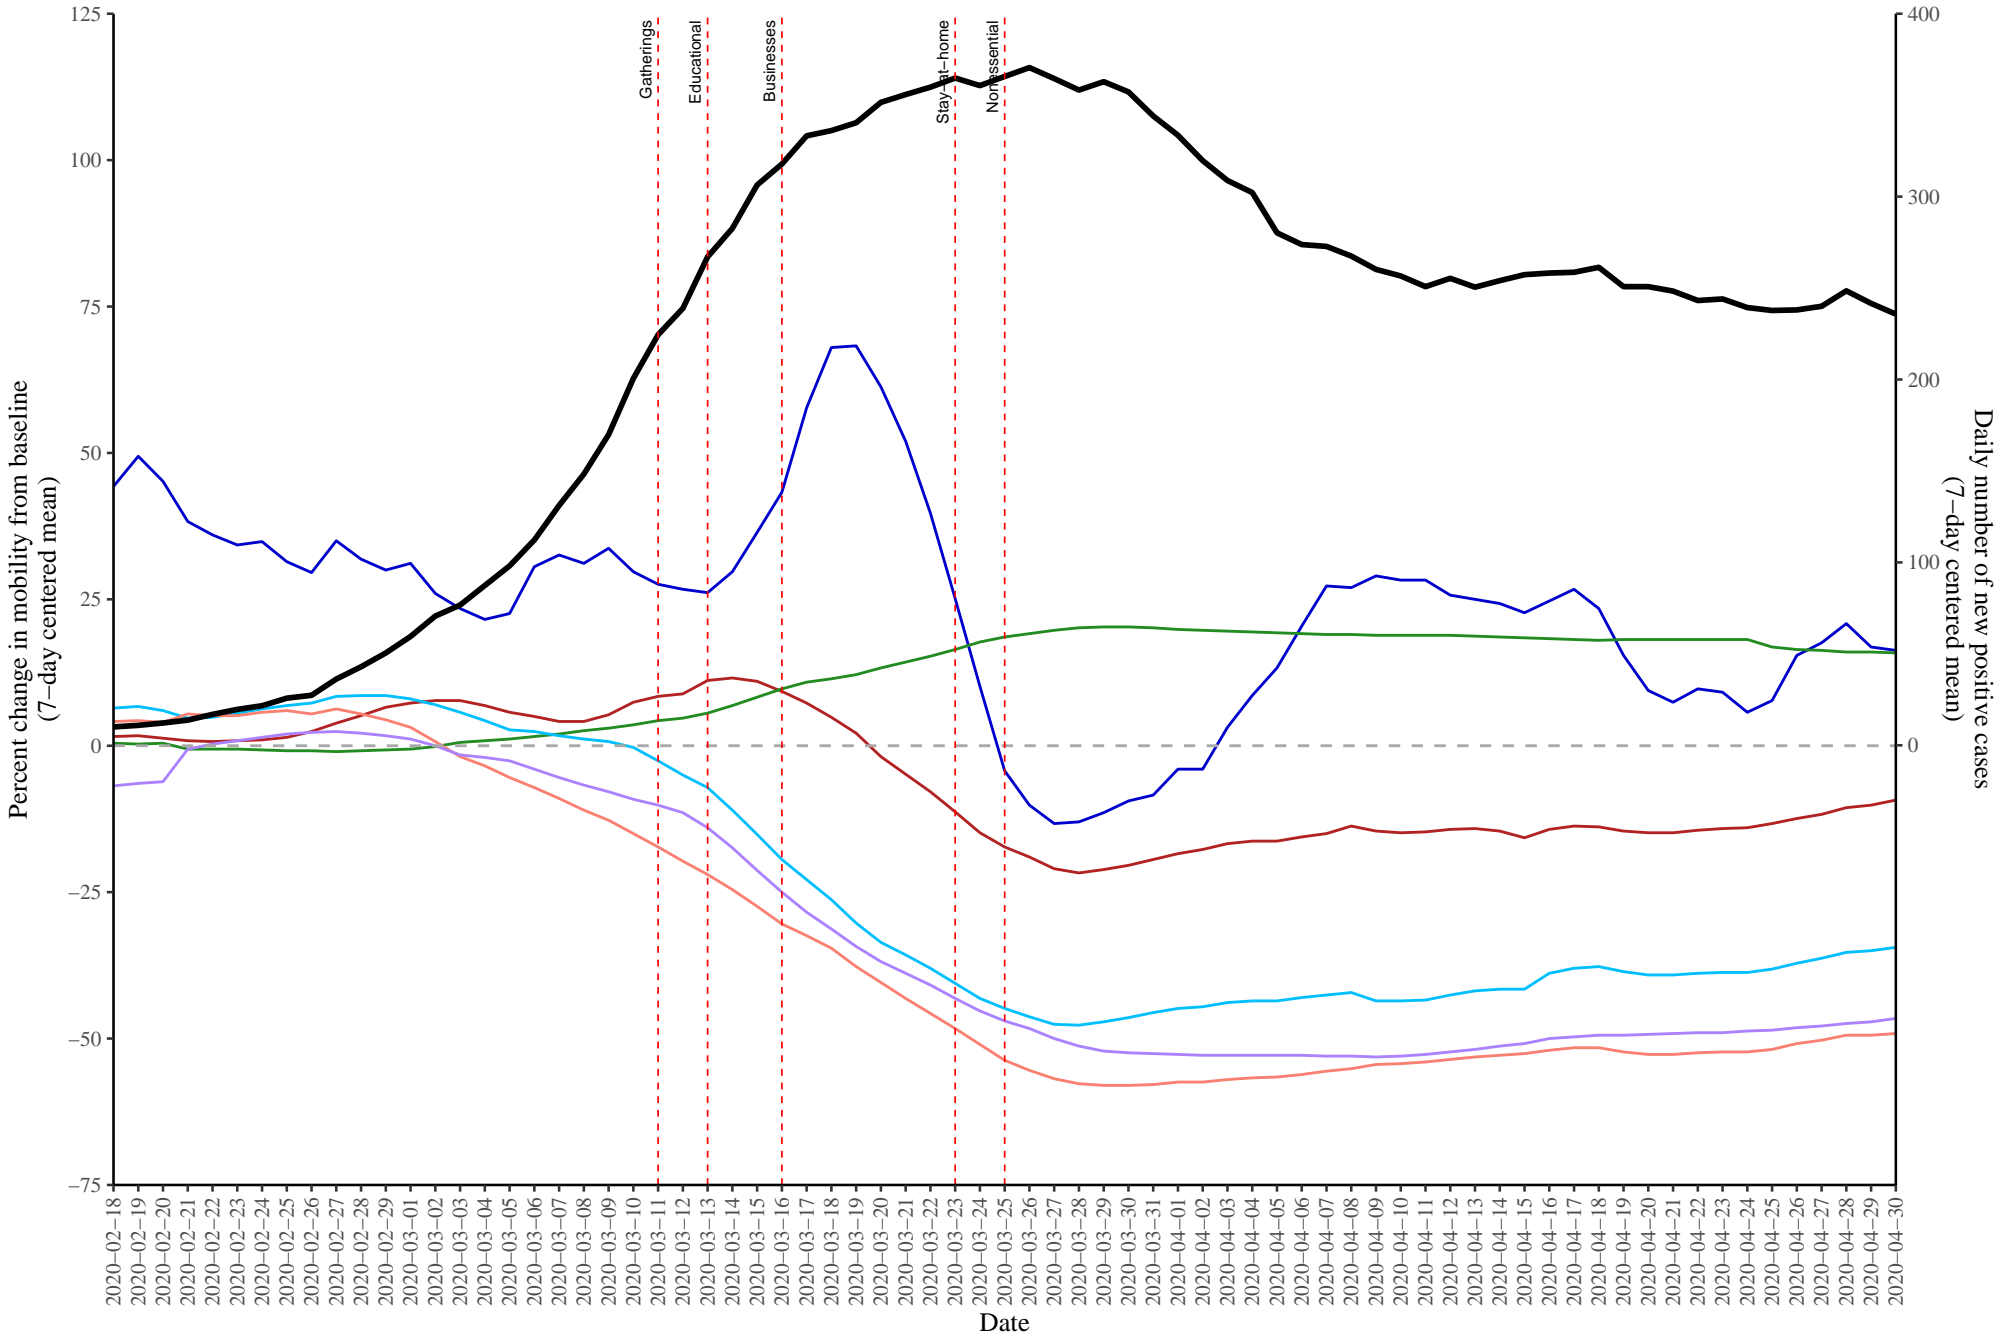

- Parks mobility
- Residential mobility
- Transit stations mobility
- SARS-CoV-2 Cases
- Grocery and pharmacy mobility
- Retail and recreation mobility
- Workplace mobility

# West\_Virginia

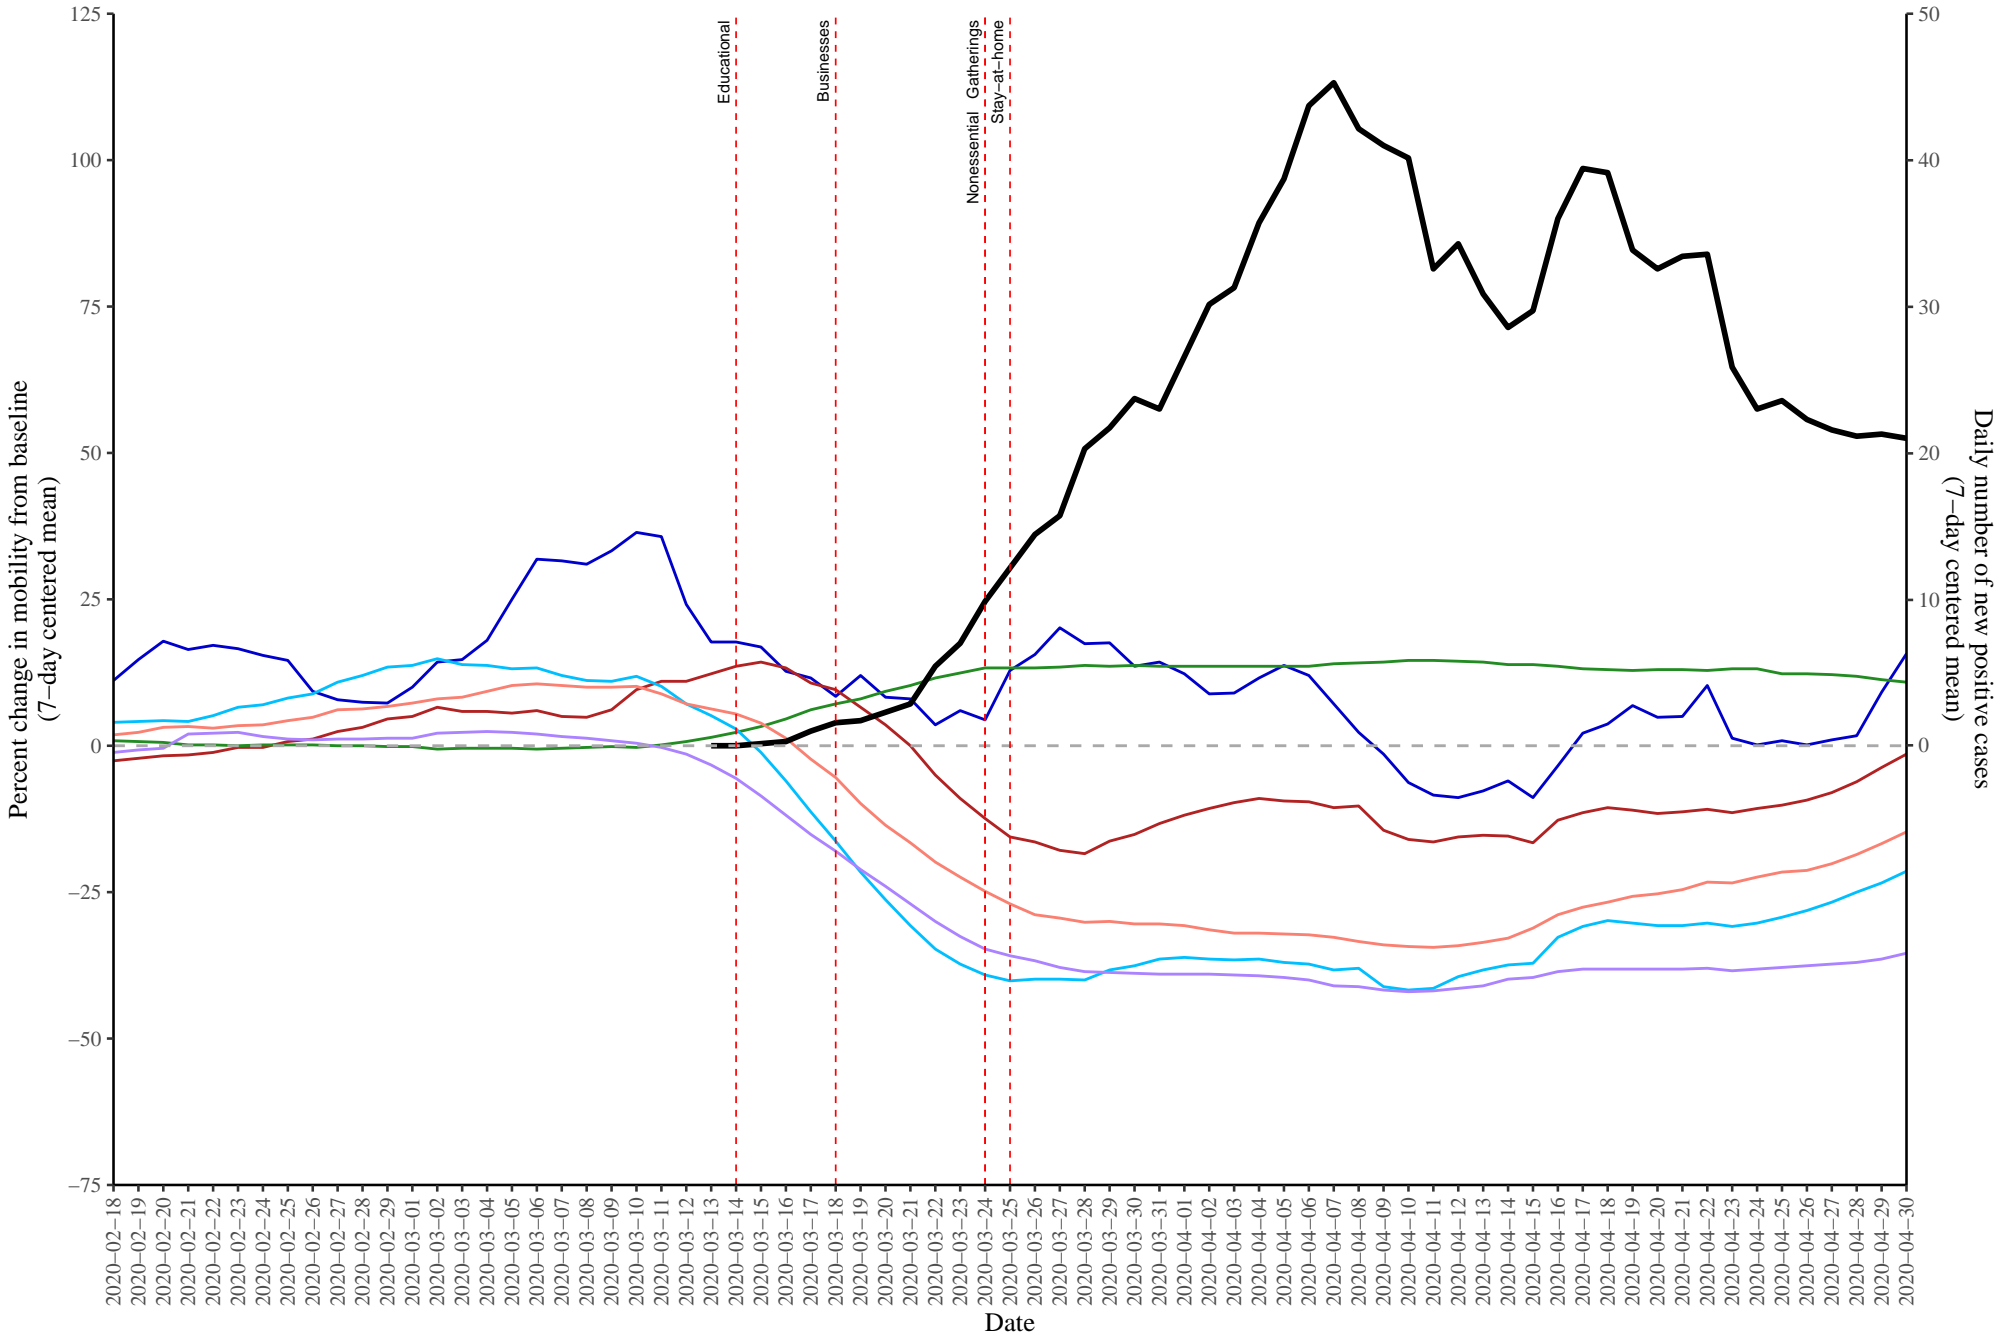

- Parks mobility
- Residential mobility
- Transit stations mobility
- SARS-CoV-2 Cases
- Grocery and pharmacy mobility
- Retail and recreation mobility
- Workplace mobility

# Wisconsin

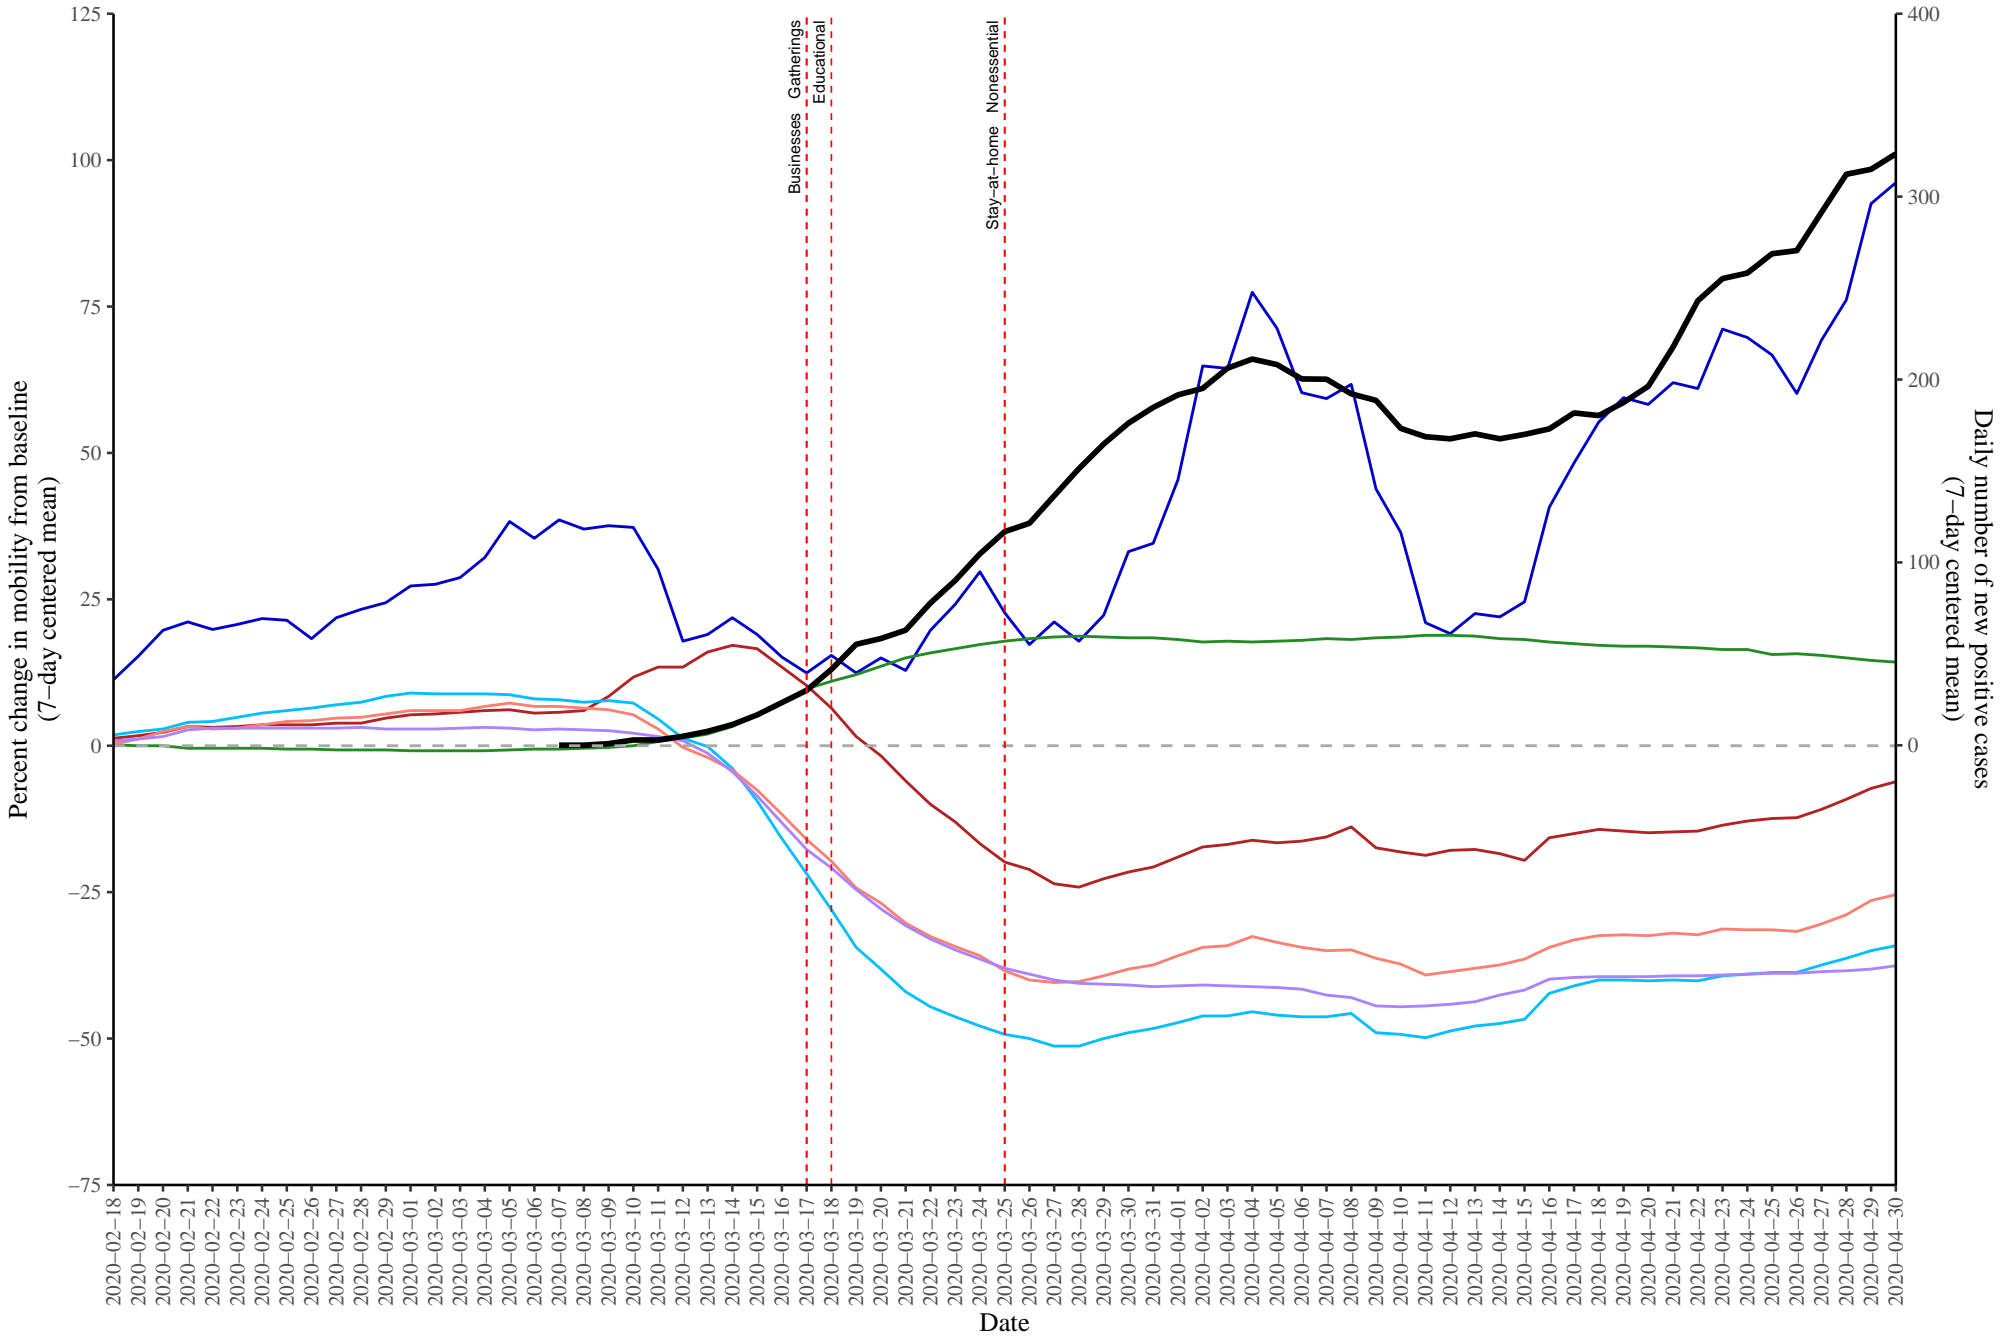

- Parks mobility
- Residential mobility
- Transit stations mobility
- SARS-CoV-2 Cases
- Grocery and pharmacy mobility
- Retail and recreation mobility
- Workplace mobility

# Wyoming

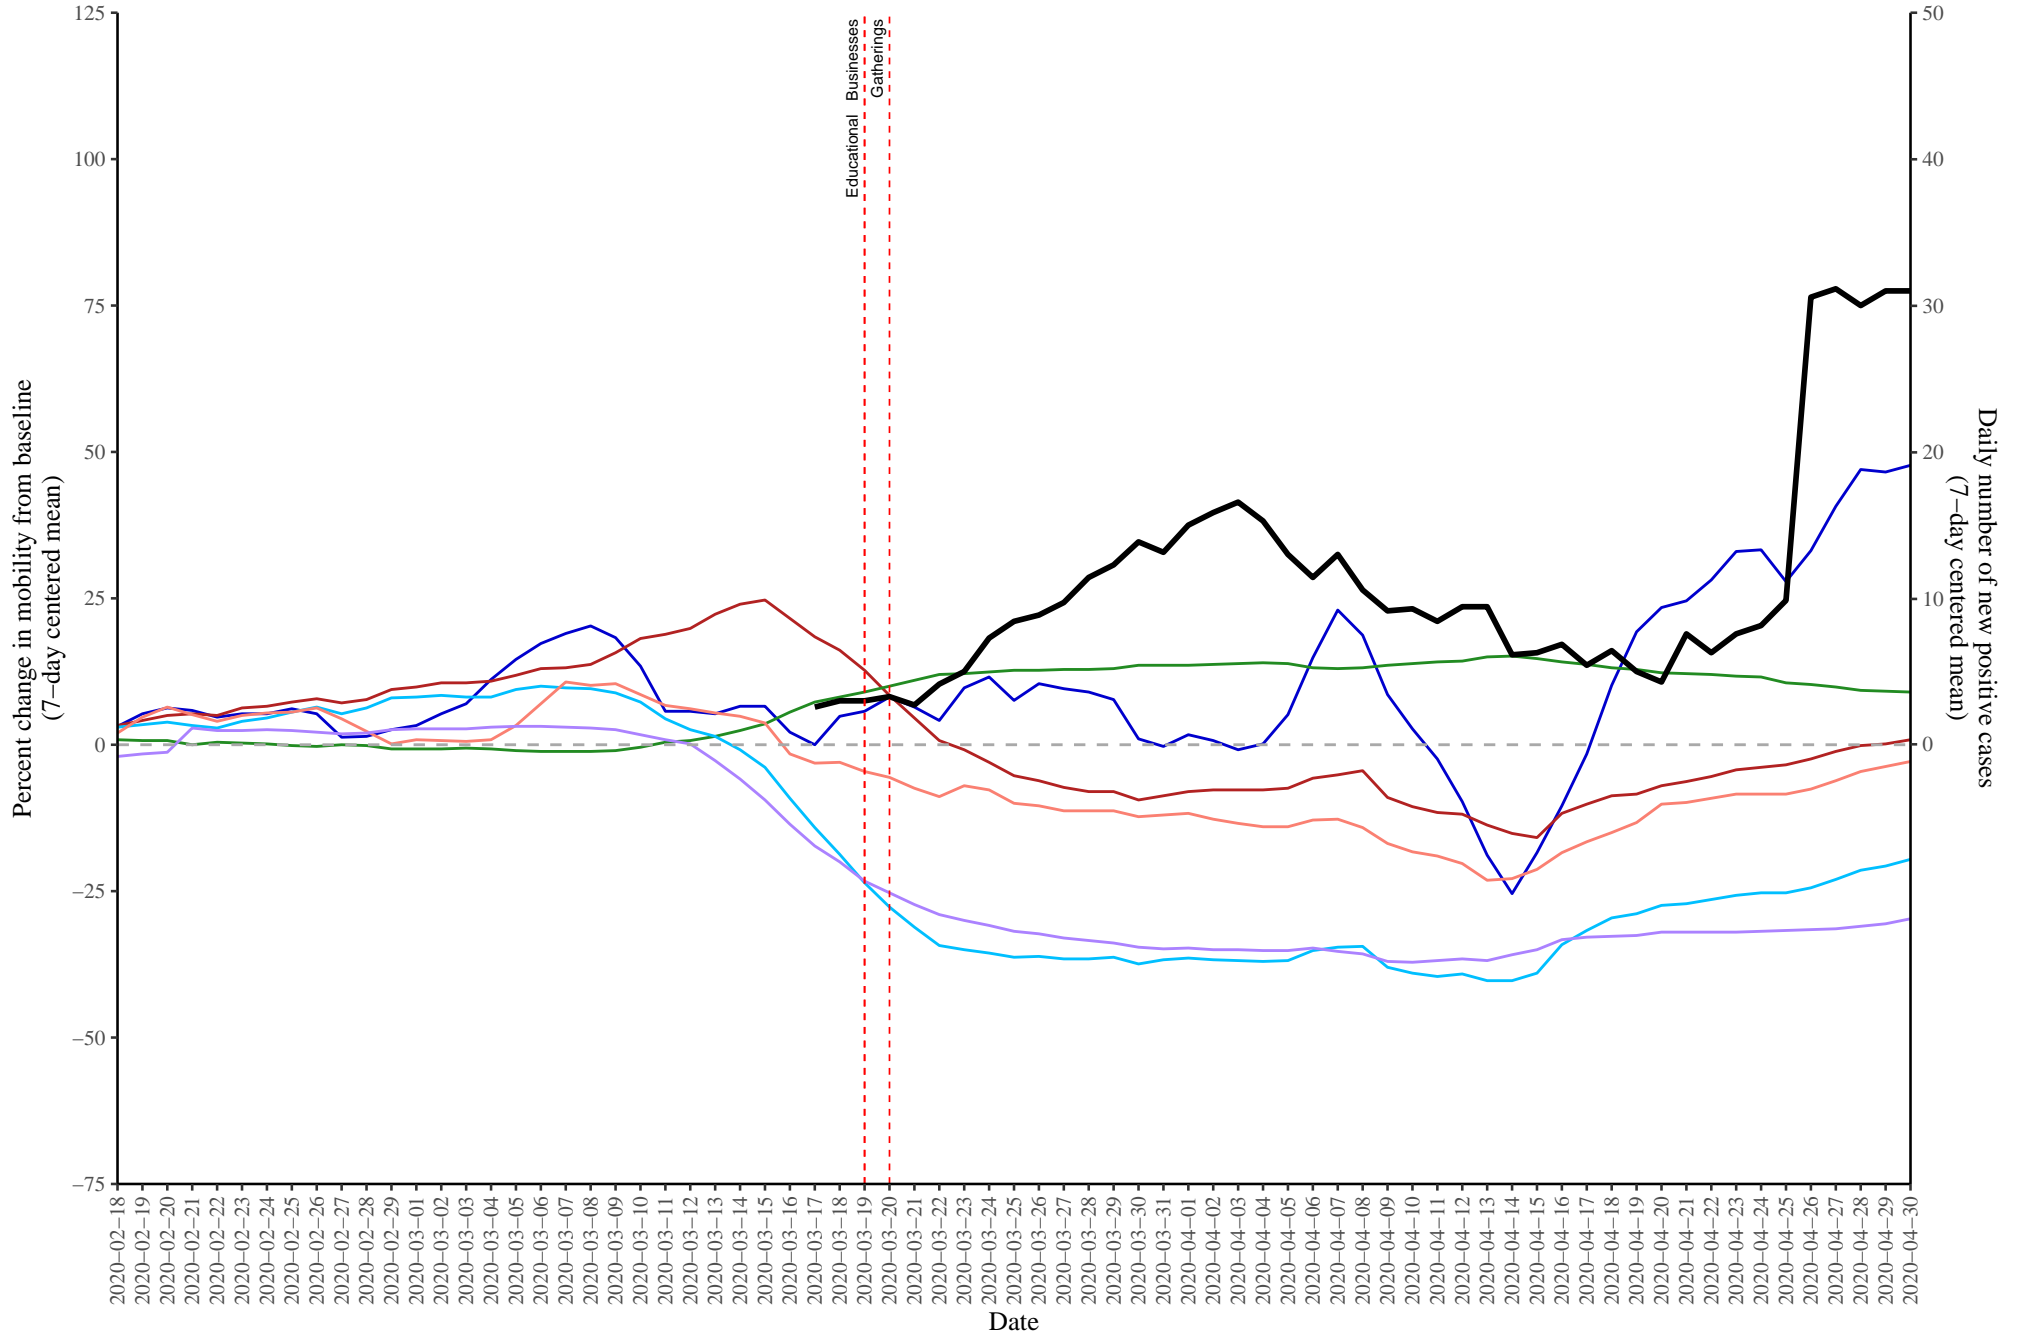

- Parks mobility
- Residential mobility
- Transit stations mobility
- SARS-CoV-2 Cases
- Grocery and pharmacy mobility
- Retail and recreation mobility
- Workplace mobility

**Supplemental Figure 2: Proportional change in mobility at the time of government-issued social distancing orders, relative to the maximum degree change over the study period**

Proportional change in mobility at the time various government-issued social distancing orders (SDOs) were put in place relative to the maximum change in mobility achieved in that state over the entire study period (February 29 – April 30, 2020. Mobility was measured as one of four categories based on the type of locations used by the public: residential areas (e.g. houses, apartments), retail and recreation locations, transit stations, and workplaces. Residential mobility increased over the course of the study period, while all other mobility categories decreased. Social distancing orders included: 1) closure of educational facilities, B) any restrictions on gatherings, C) closure of any businesses, D) closure of all nonessential businesses, and E) stay-at-home orders.

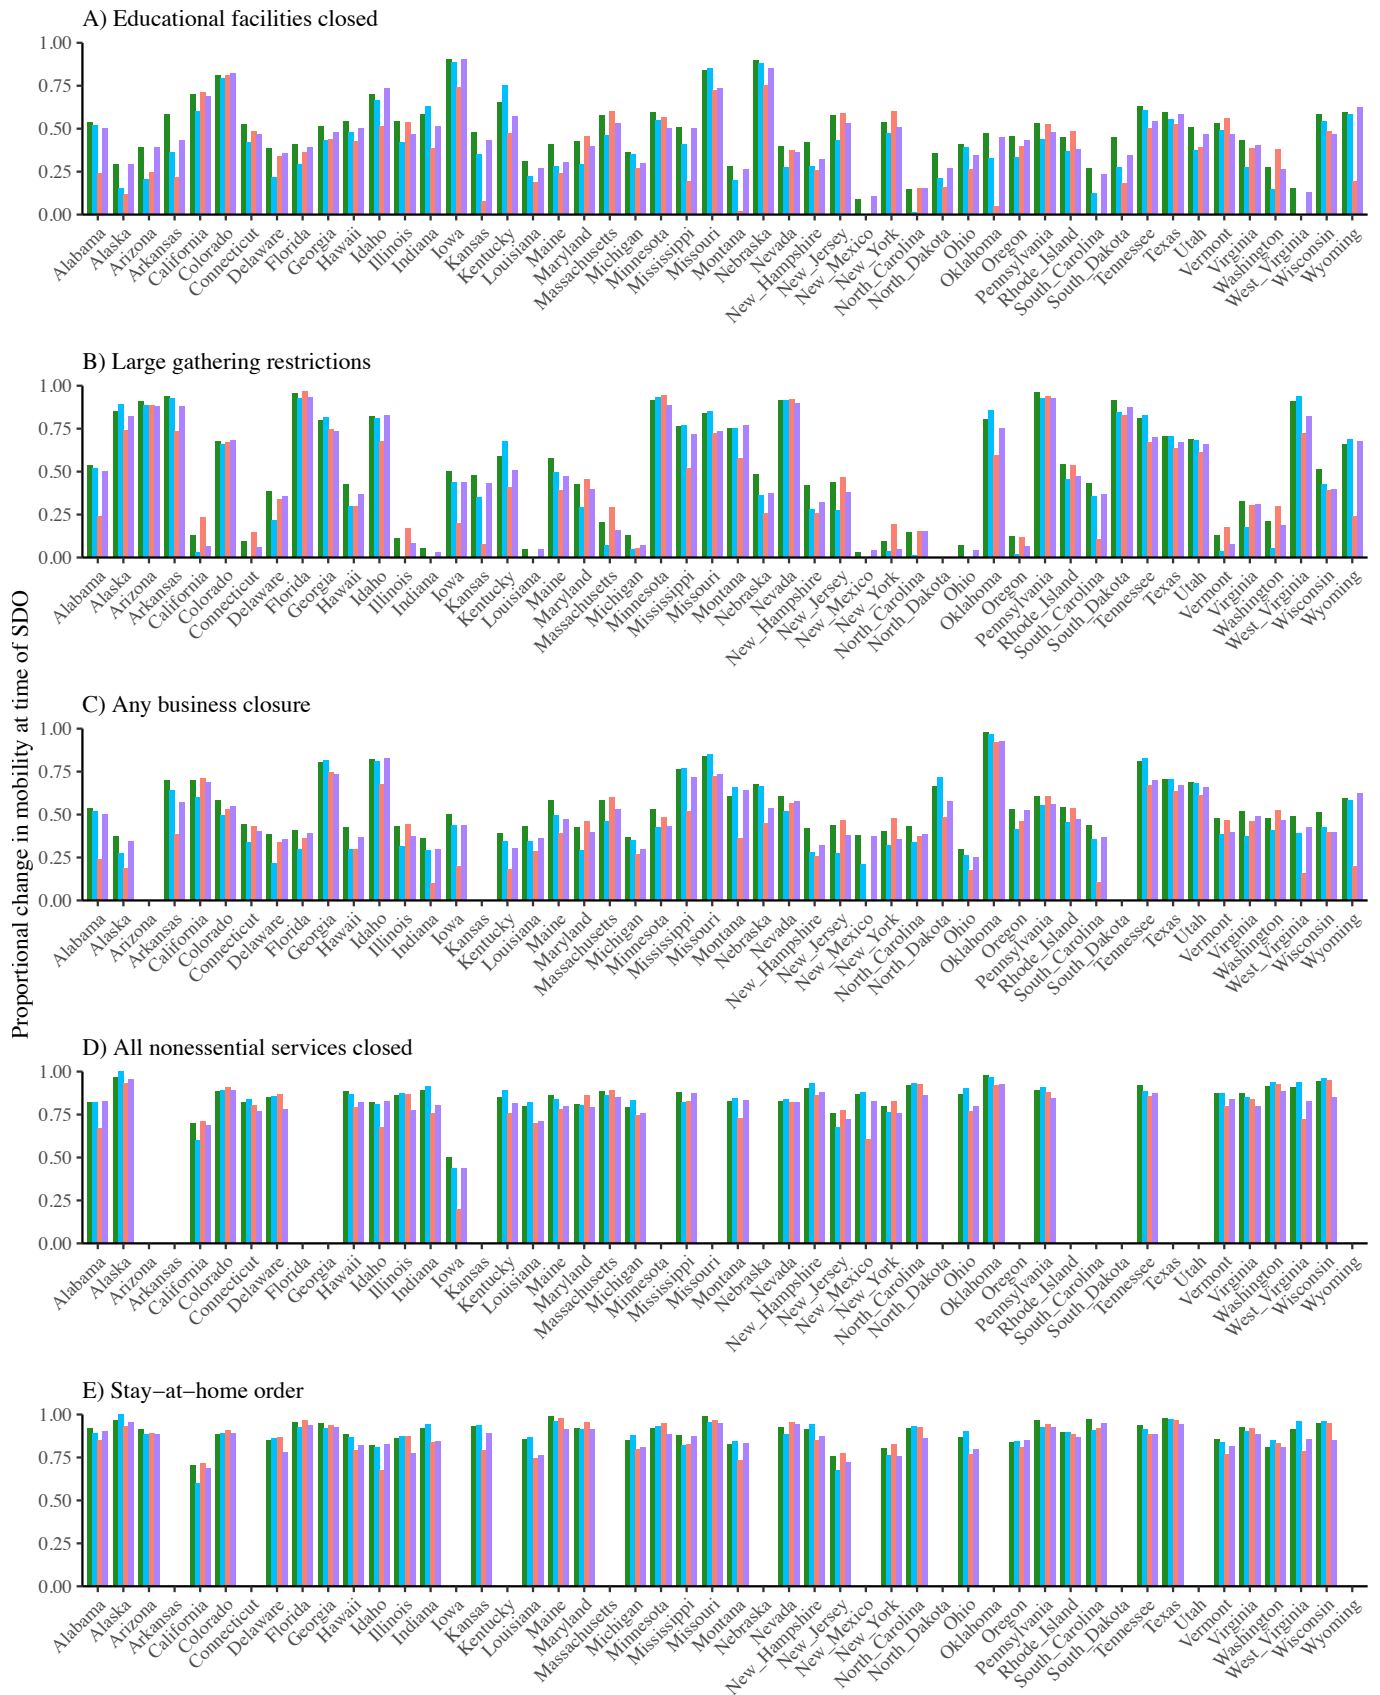

### **Supplemental Figure 3: Cross-correlation between daily SARS-CoV-2 cases and mobility**

Results of cross-correlation between the daily count of severe acute respiratory syndrome coronavirus 2 (SARS-CoV-2) cases and daily mobility metrics (proportional change compared to baseline) in the United States, from February 29 – April 30, 2020 (seven-day centered means used for both variables). Mobility was measured using anonymized location data aggregated from mobile phones and stratified by A) parks, B) residential locations, C) grocery stores and pharmacies, D) retail and recreation locations, E) transit stations, and F) workplaces. Lag values along the x-axis describe the number of days that mobility values were lagged to correlate with daily cases. For example, the correlation value on day “-5” corresponds to the correlation between the daily case count on  $day_t$  and the mobility value from  $day_{t-5}$ .

A) Grocery store and pharmacy

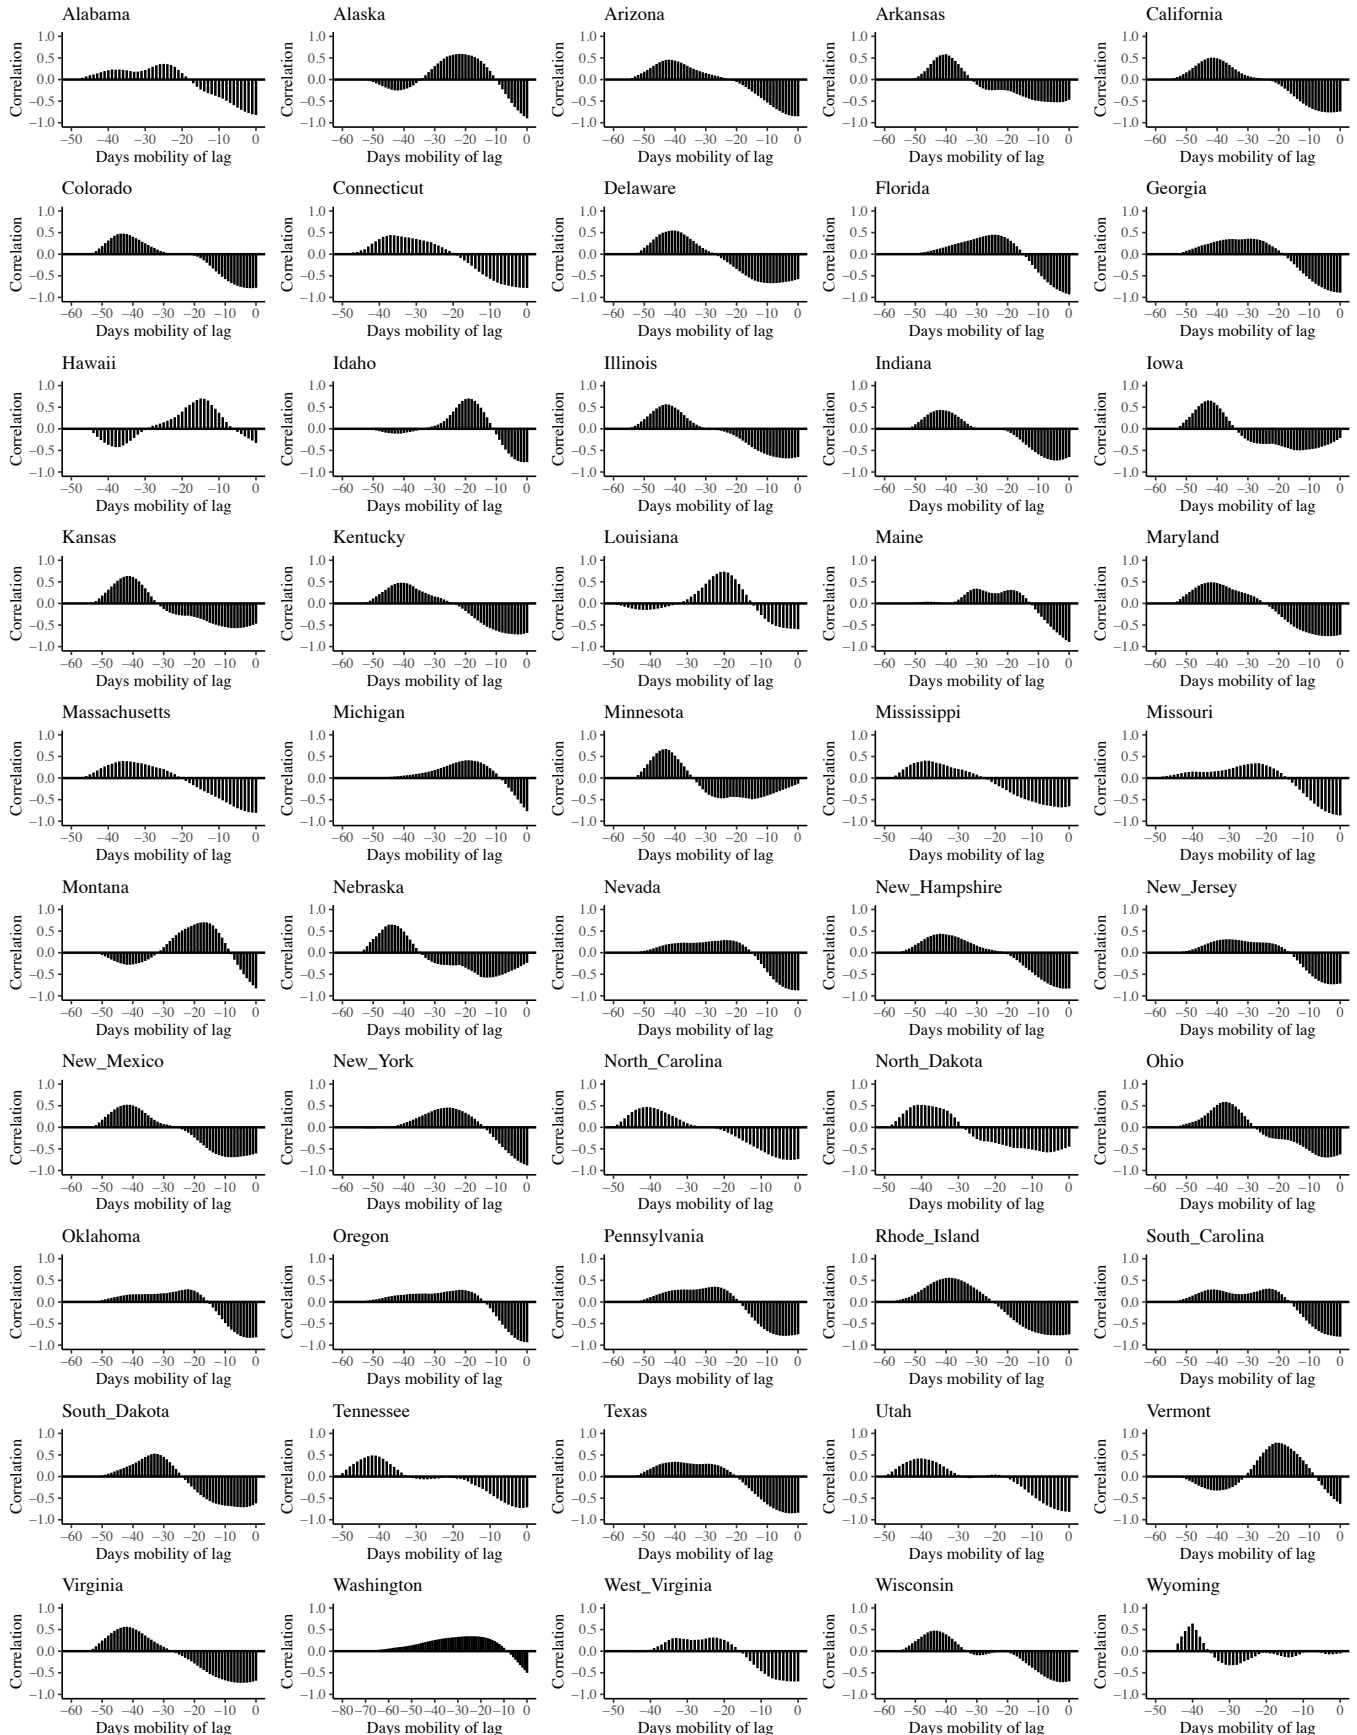



B) Retail and Recreation

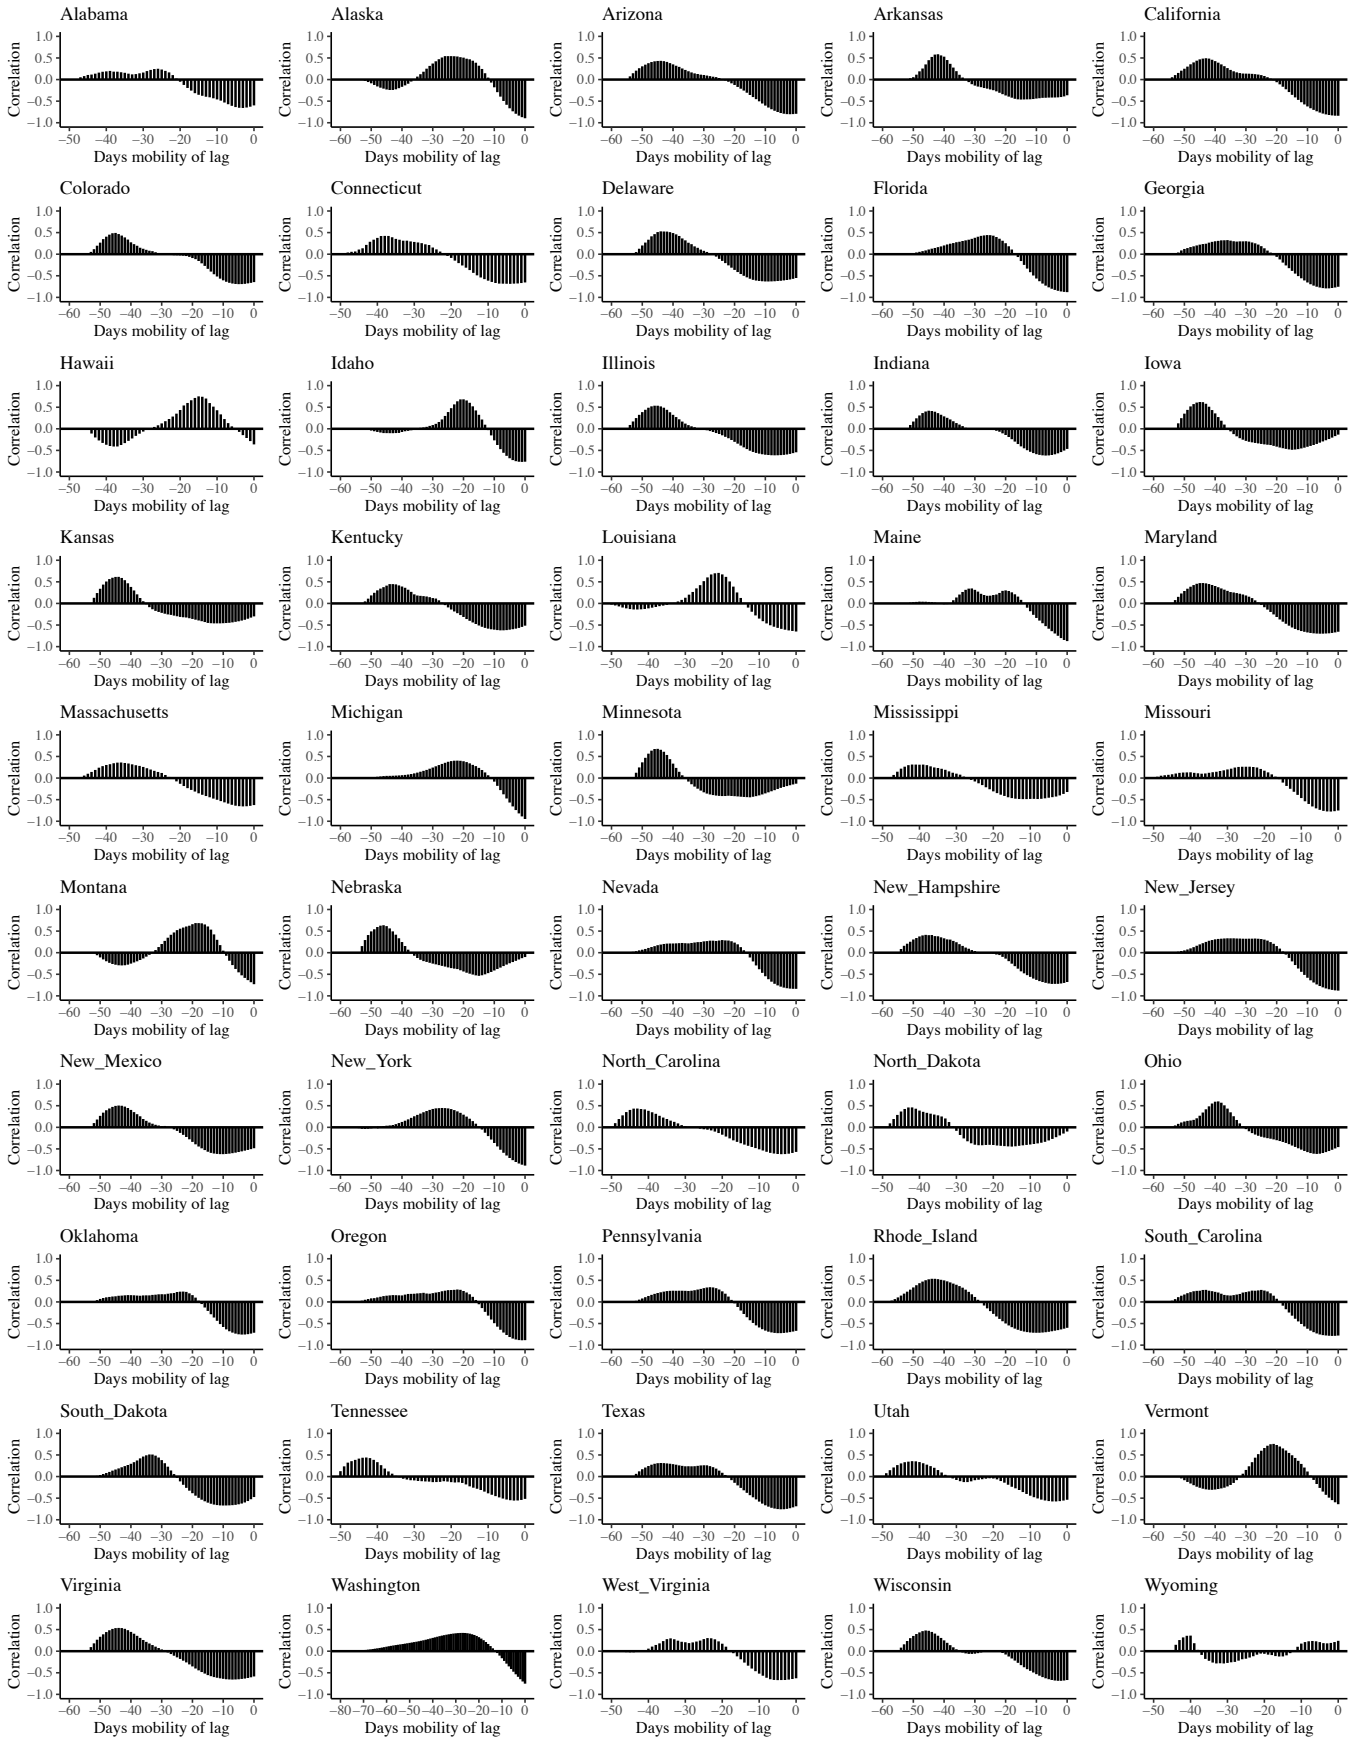

C) Transit stations

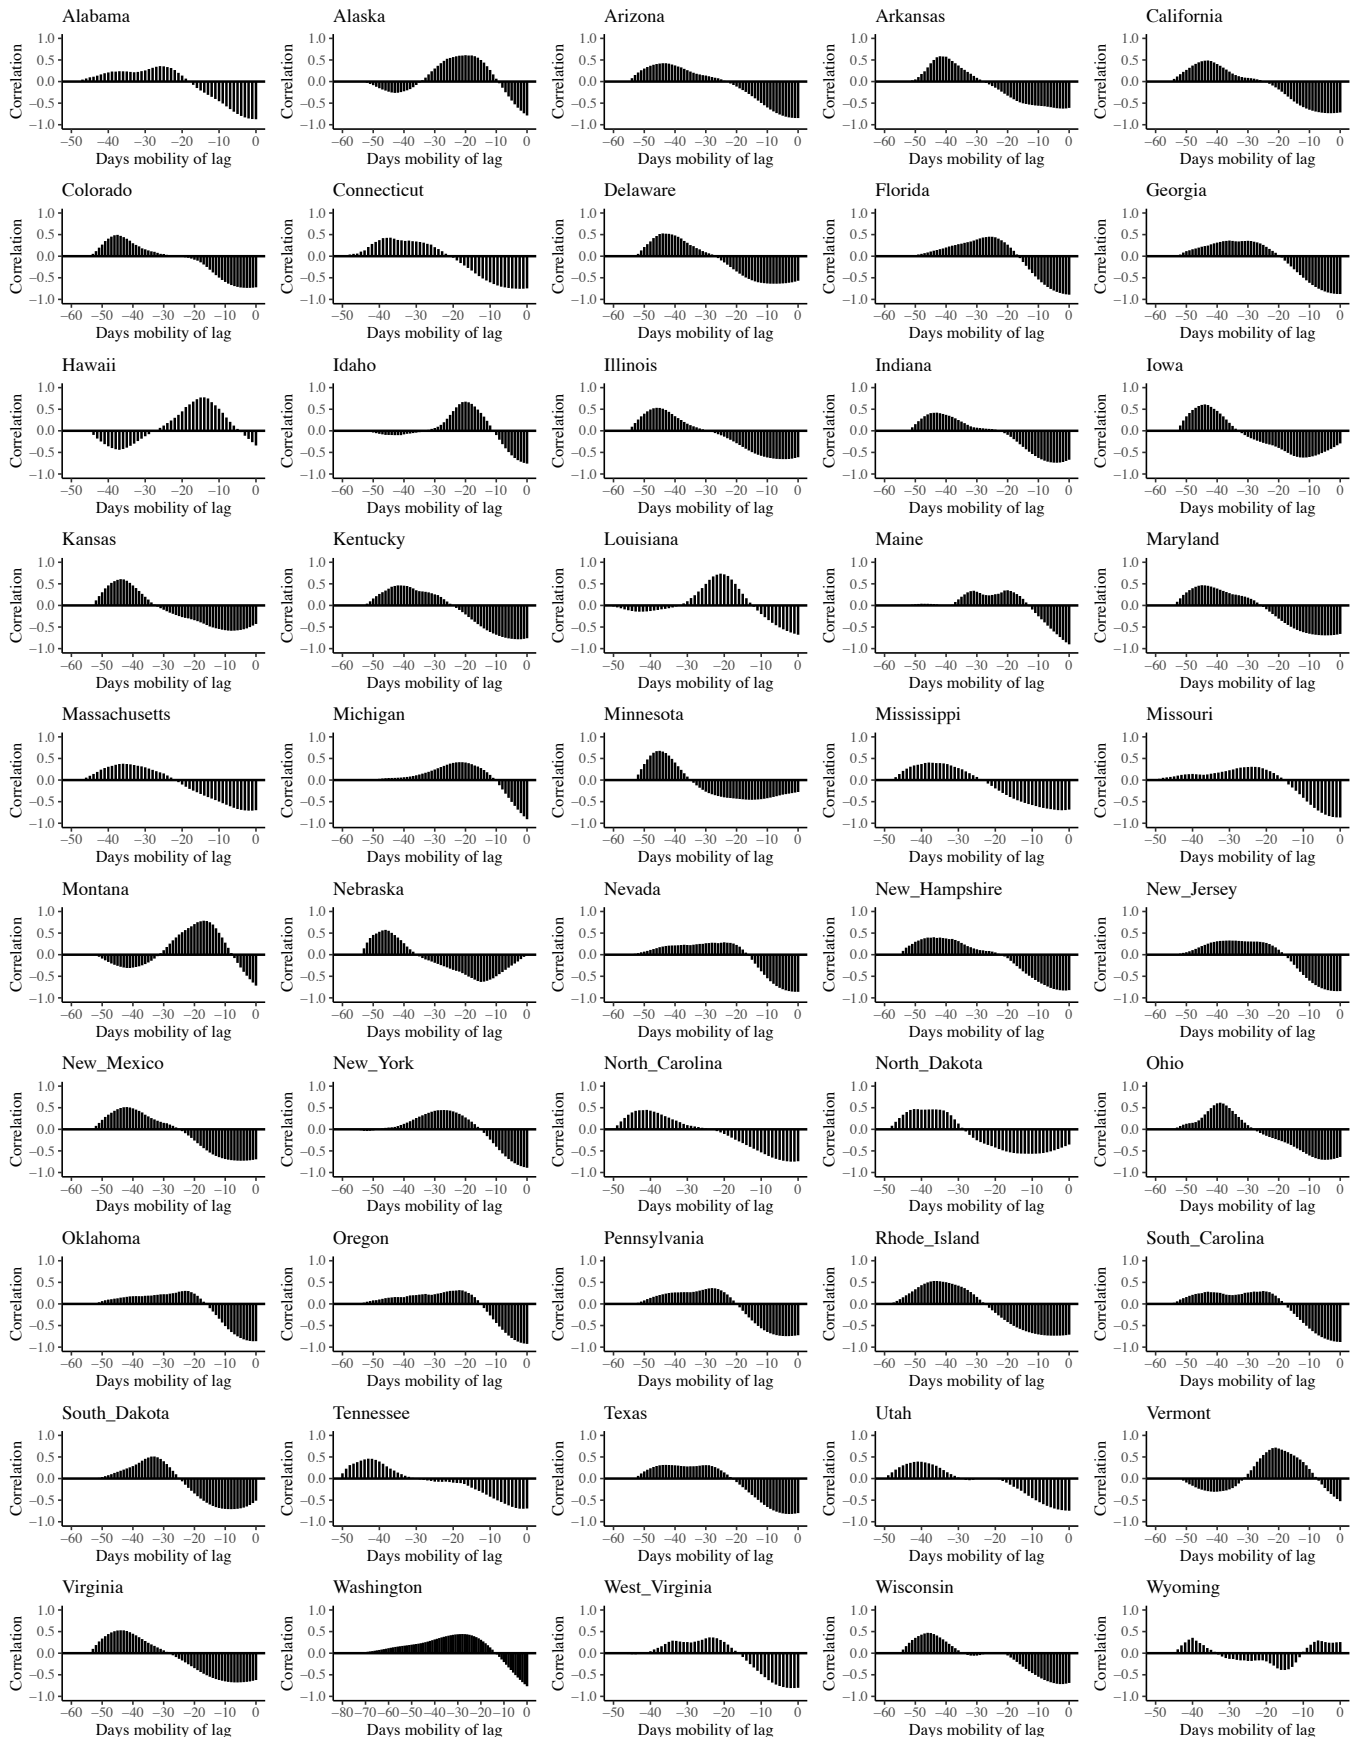

D) Workplace

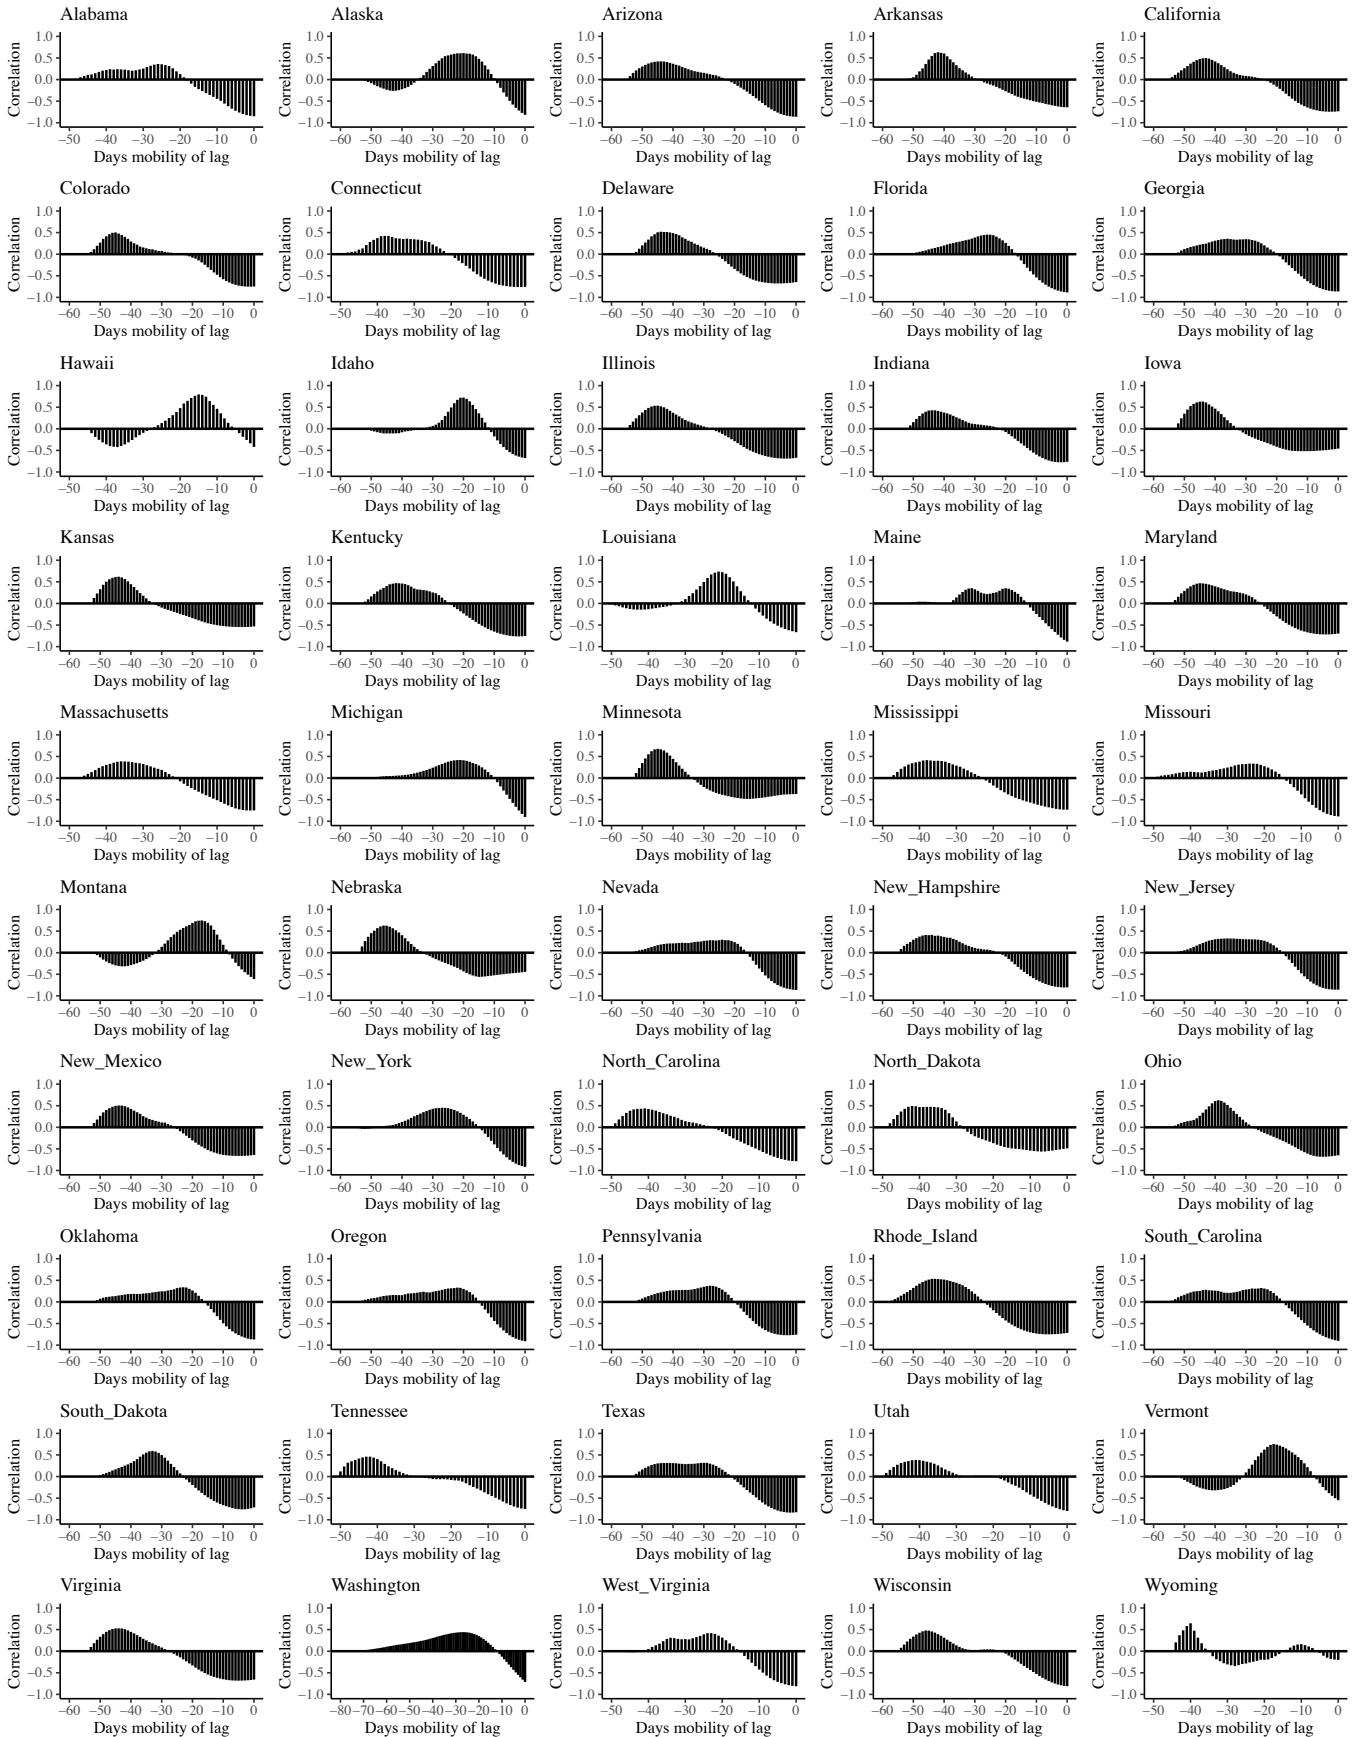

## E) Residential

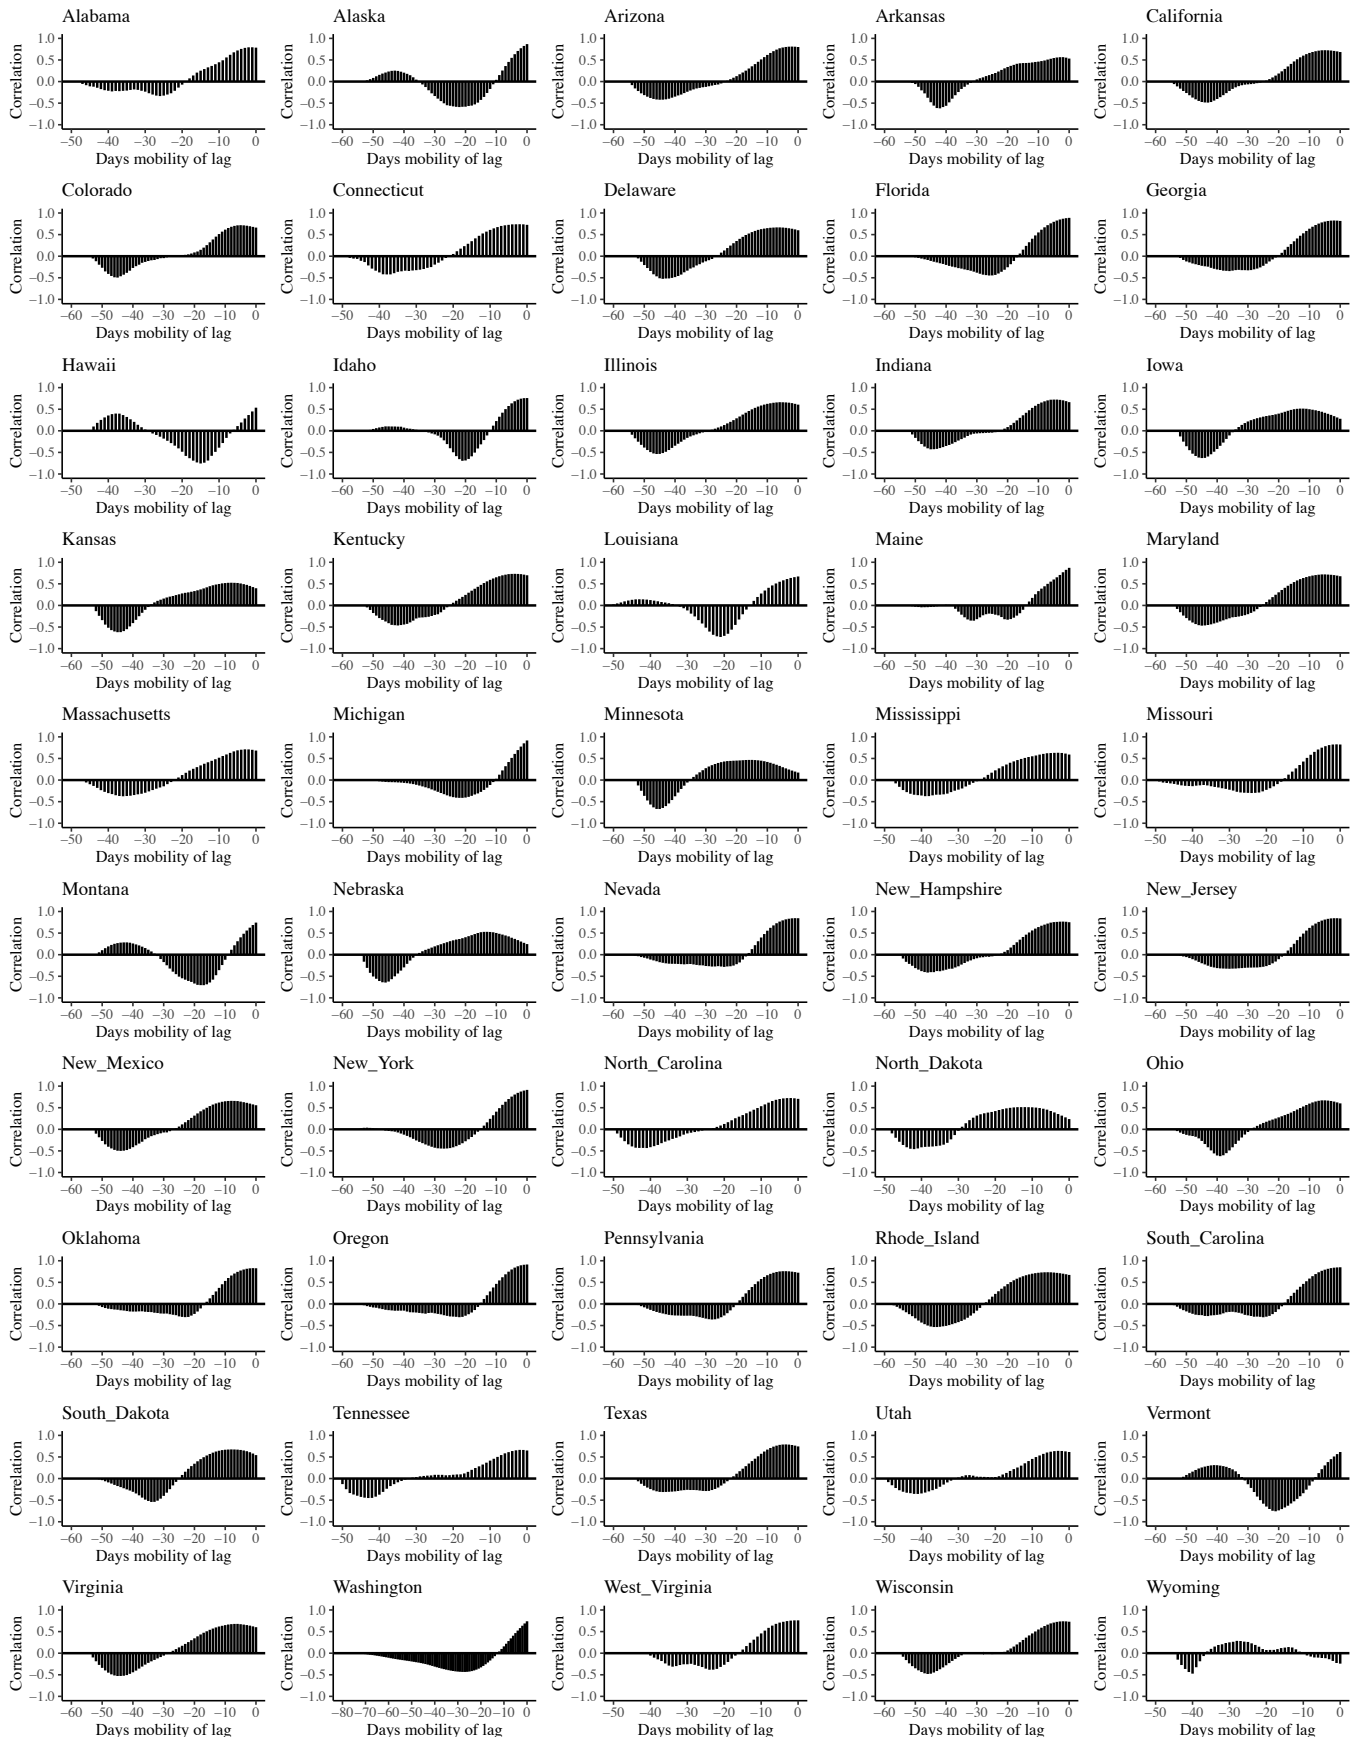

F) Parks

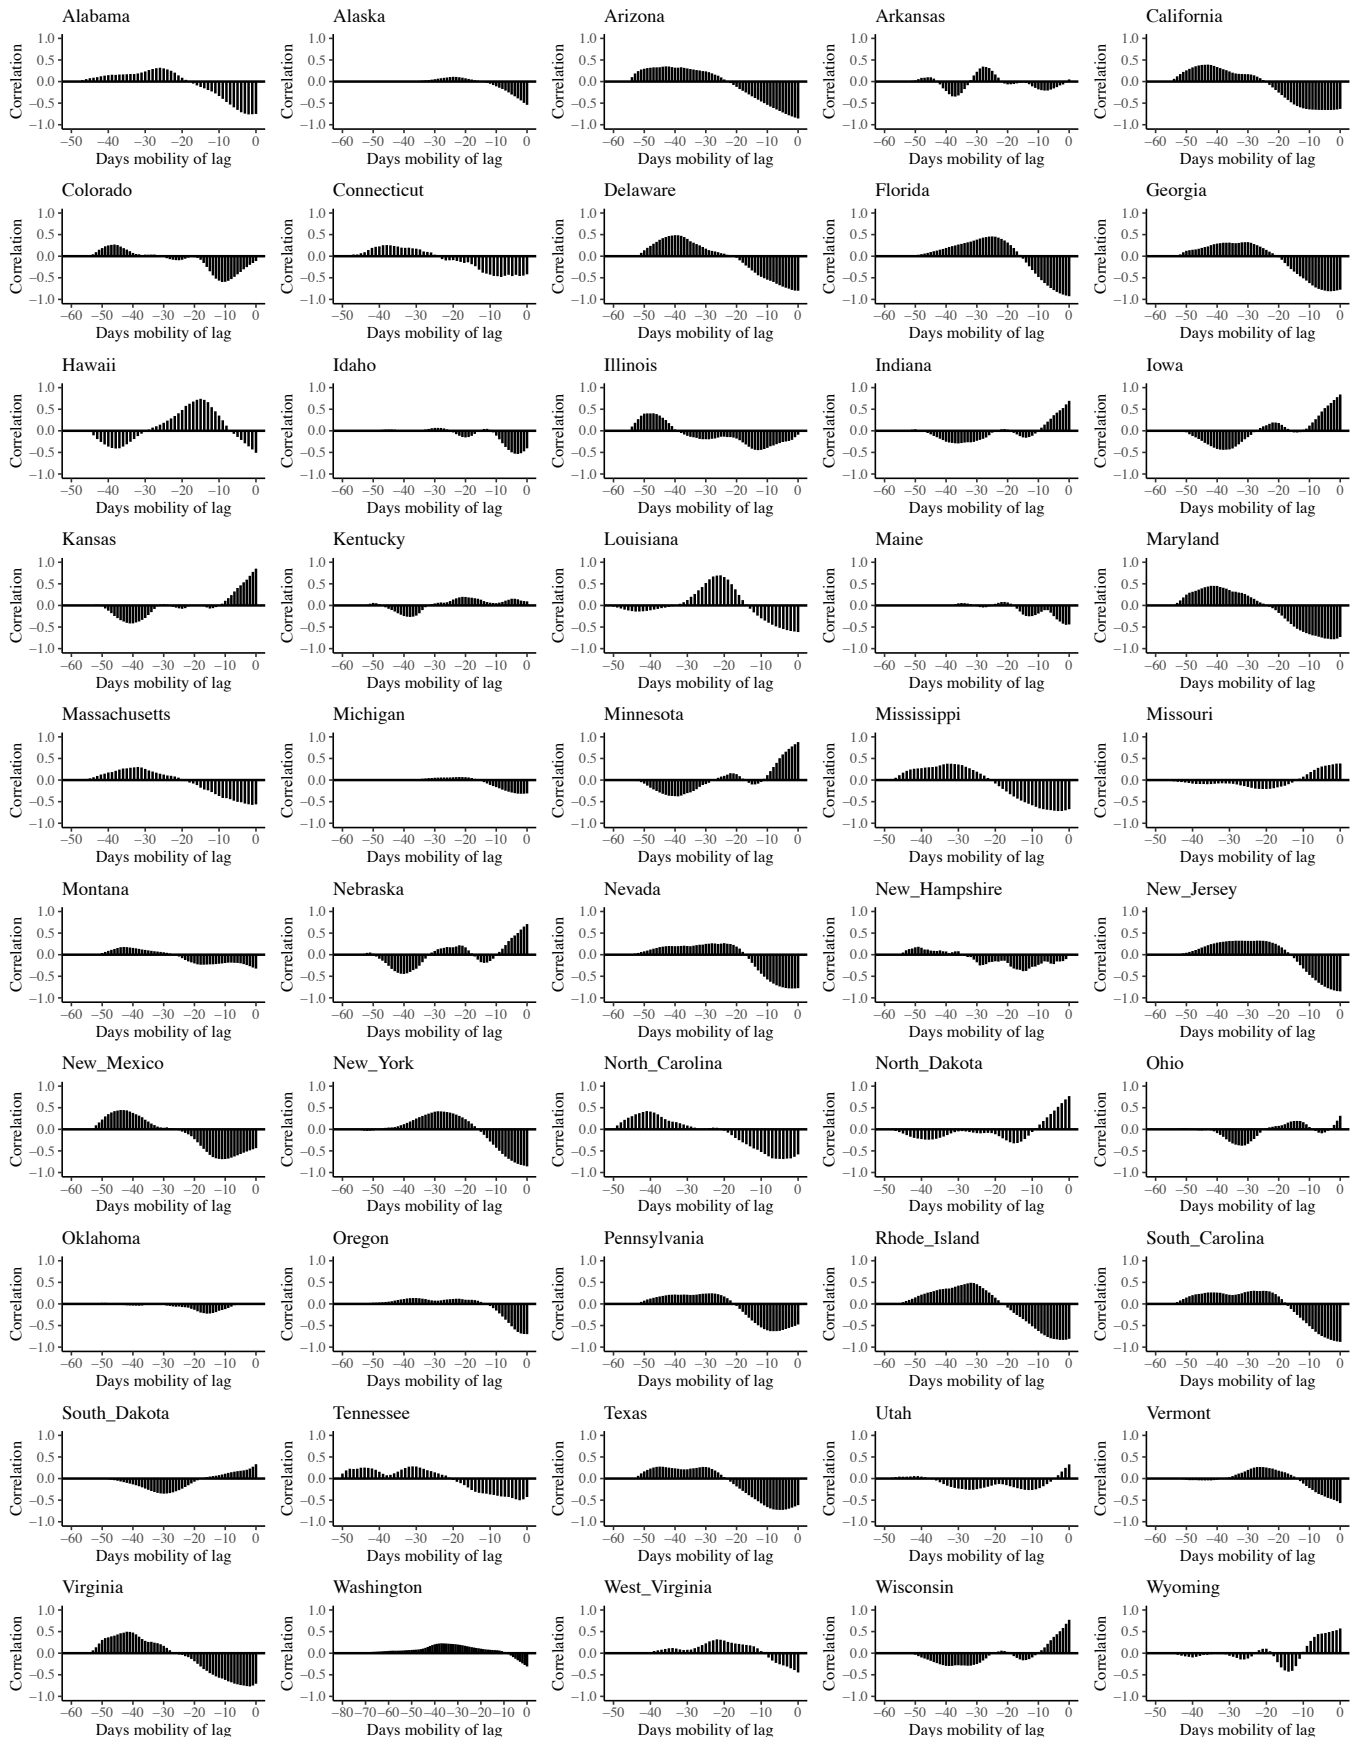

#### **Supplemental Figure 4: Plot of mobility model random effects**

Plots of random effects from Bayesian, negative binomial mixed effect regression models testing time-varying mobility measures as predictors of the daily count of total positive cases. Time invariant predictors included the proportion of the population living in an urban and the number of airports in each state. The state was used as a random intercept and the number of days since a state ran 10 tests was used as the random slope. Mobility (as measured by anonymized location data aggregated from mobile phones) was included in the model as one of six categories based on the type of locations used by the public: A) grocery stores and pharmacies, B) retail and recreation locations, C) transit stations, D) workplaces, E) residential, and F) parks.

A) Grocery and pharmacy

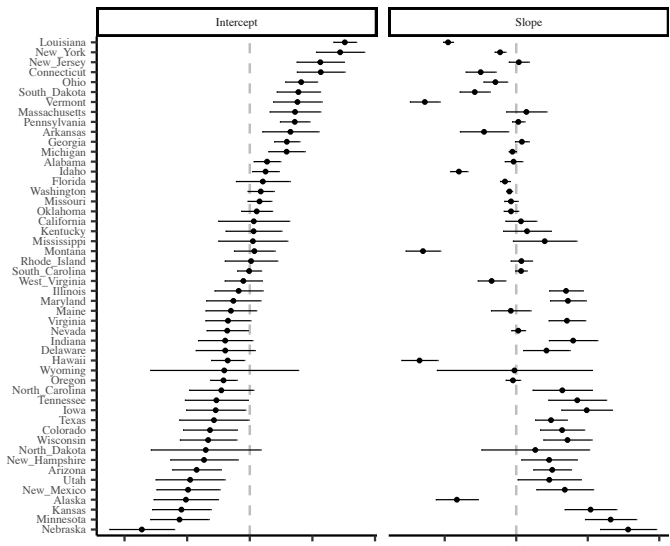

B) Retail and recreation

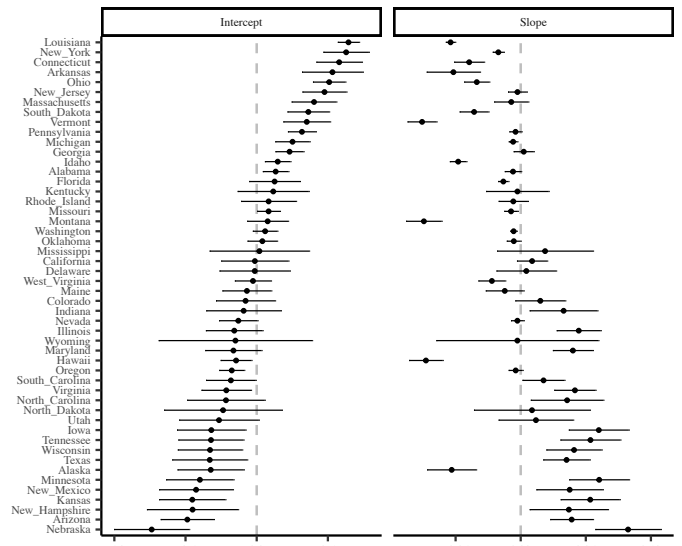

C) Transit stations

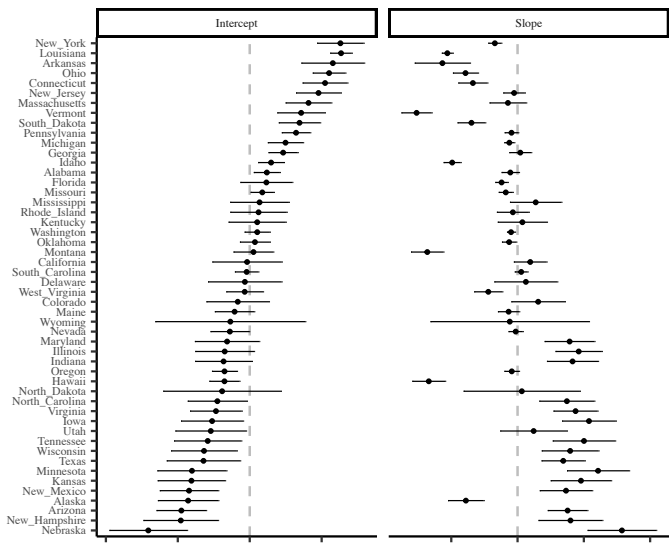

D) Workplace

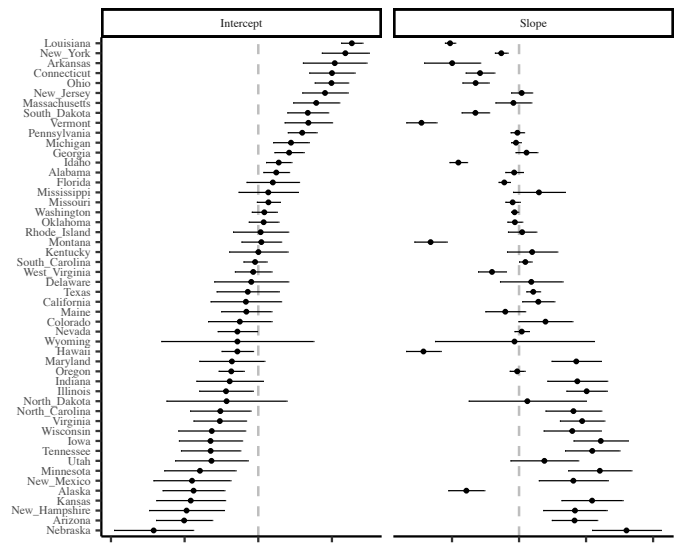

E) Residential

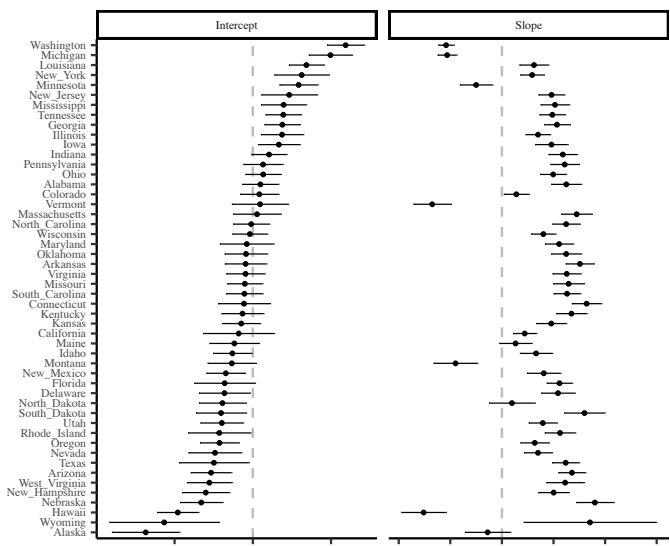

F) Parks

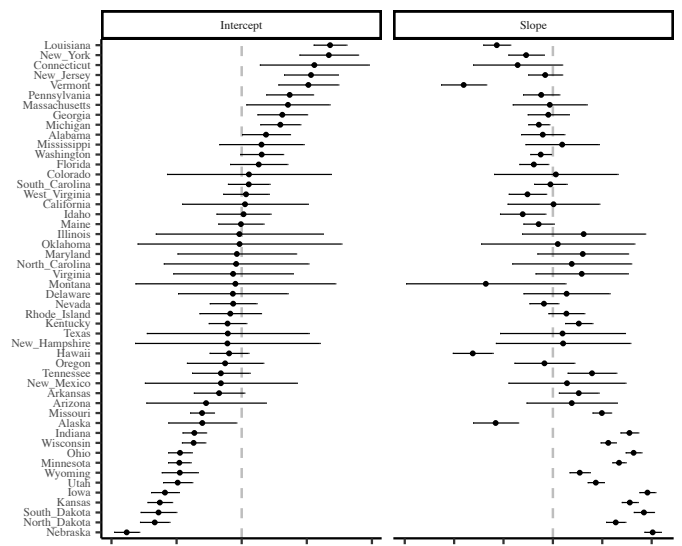

### **Supplemental Figure 5: Posterior predictive checks of mobility models**

Posterior predictive density plots from Bayesian, negative binomial mixed effect regression models testing time-varying mobility measures as predictors of the daily count of total positive SARS-CoV-2 cases. Time invariant predictors included the proportion of the population living in an urban and the number of airports in each state. The state was used as a random intercept and the number of days since a state ran 10 tests was used as the random slope. Mobility (as measured by anonymized location data aggregated from mobile phones) was included in the model as one of six categories based on the type of locations used by the public: A) grocery stores and pharmacies, B) retail and recreation locations, C) transit stations, D) workplaces, E) residential, and F) parks.  $y$  = empirical values of the outcome variable,  $y_{rep}$  = simulated replications ( $n = 1,000$ ) of the outcome drawn from the model's posterior predictive distribution.



A) Grocery and pharmacy

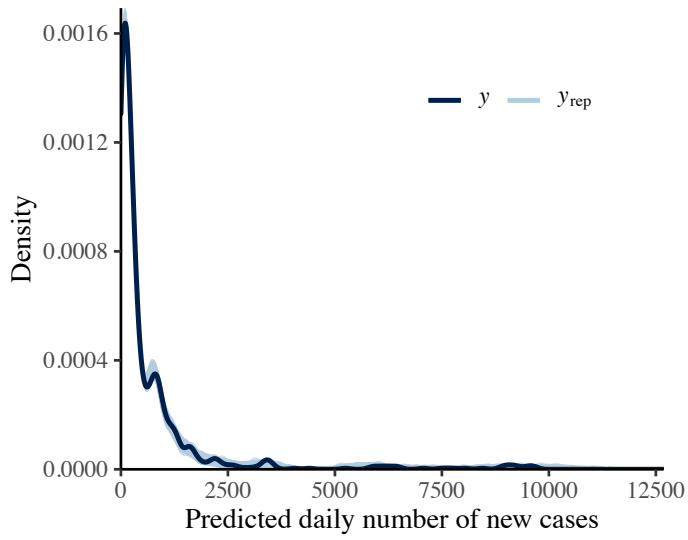

B) Retail and recreation

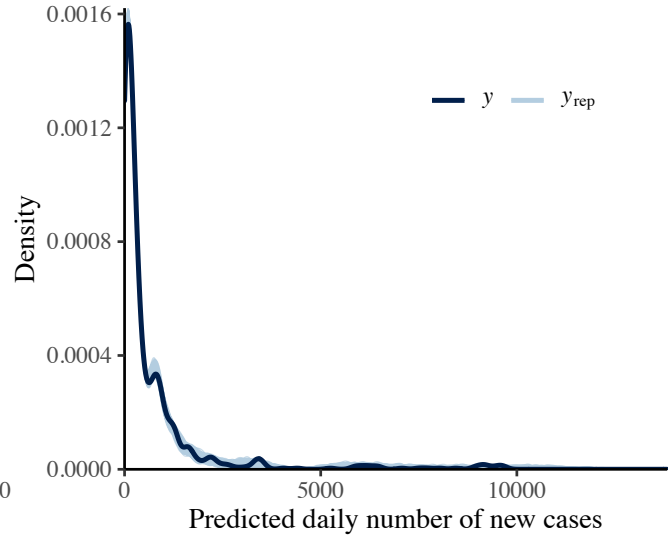

C) Transit stations

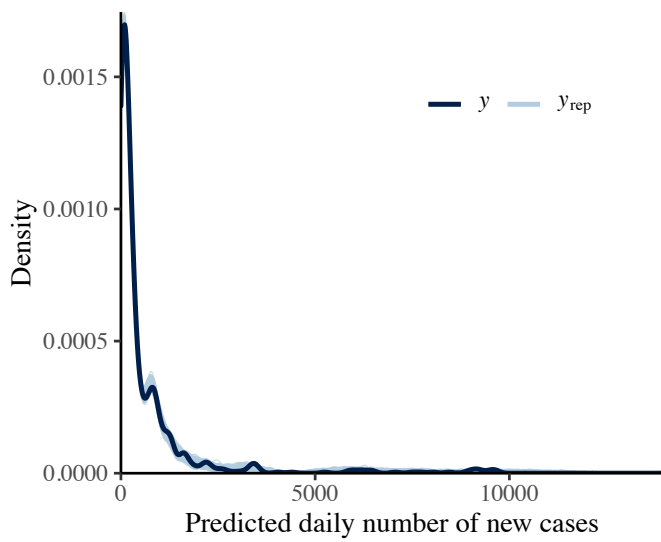

D) Workplace

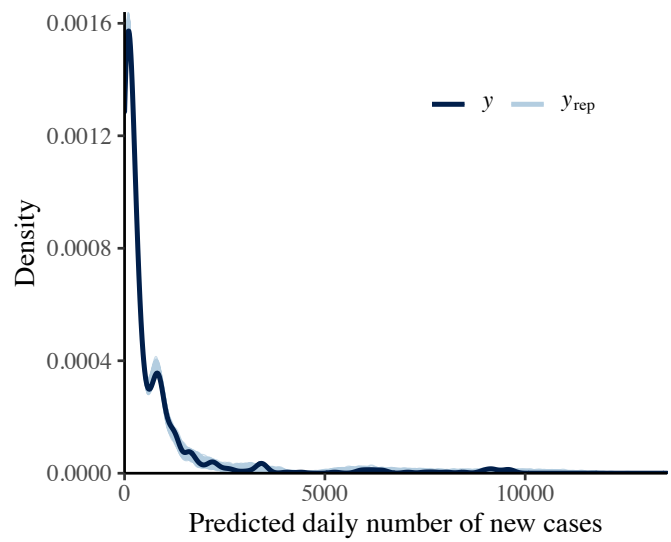

E) Residential

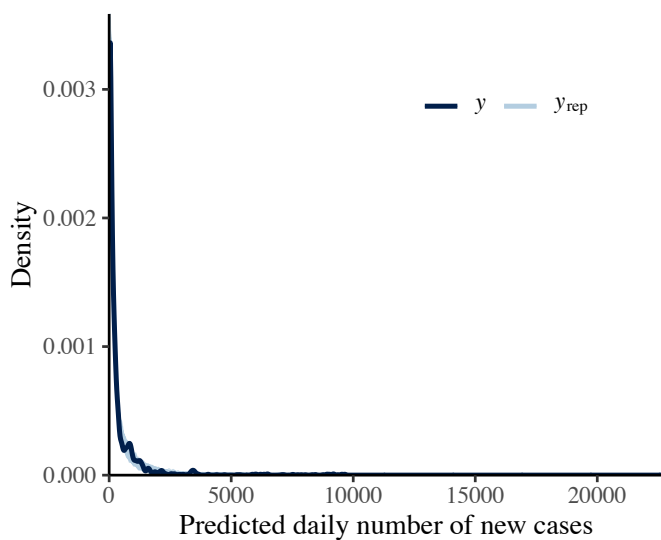

F) Parks

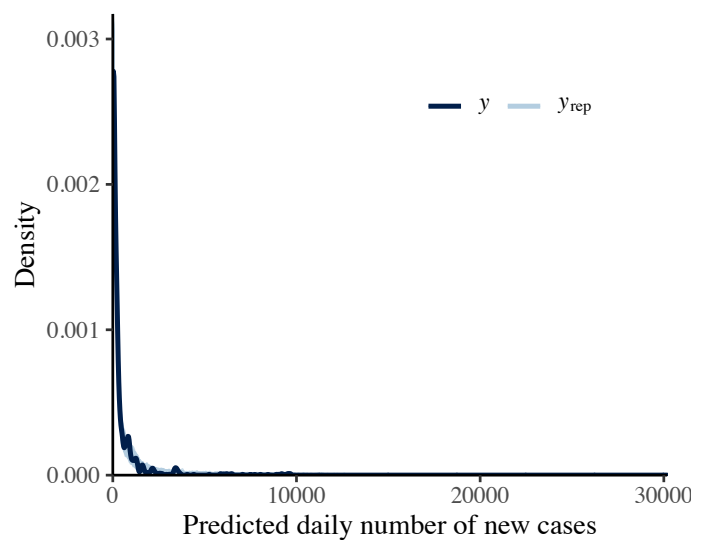

Supplement: NIHMS1799535-supplement-SI.pdf [file NIHMS1799535-supplement-SI.pdf]
